# Supplementary material for: The Two-years Immune Effect Between 0-1-2-months and 0-1-6-months of HBV Vaccination Schedule in Adults
Source: Research Square preprint supplement (doi:10.21203/rs.3.rs-665636/v1), 2021-07-26
Supplement: Supplementary file 1 [file e582e0d854a74c99488f6209.xlsx]

## Sheet: 1346人总表（原始数据）
是否剔除（0否，1剔1，2剔2，3剔3，4失访）	疫苗队列原始编码	VACCINATION_TYPE（1:016；2:012	VACCINATION_STATUS（打了几针）	随访状态：0.无随访；1.仅有一次随访（F1）；2.仅有一次随访（F2）；3.两次随访均有	c.DABH	ID_CARD_NO	sex赋值（1男2女）	AGE	age赋值（璇） 15-29; 30-49; 50-59	age赋值（娟） 15-29; 30-44; 45-59	age赋值（朋） 15-29; 30-49; 50-59	natinality赋值（1汉族2非汉族）	HISTORY_OF_VACCINATION（1: 无, 2: 有, 3: 不详）	MOTHER_HISTORY_OF_HB（1: 无, 2: 有, 3: 不详）	吸烟情况(1: 从不吸烟,2:现在吸烟, 3: 已戒烟,单选)	折合酒精量(1: 无, 2: <20g/天, 3: ≥20g/天,单选,【酒精含量（g）=饮酒量（ml）×乙醇含量（%）×0.8】)	既往史-高血压（1无2有3不详）	既往史-糖尿病（1无2有3不详）	身高(CM)	体重(KG)	腰围(CM)	BMI	收缩压	舒张压	ALT	HBsAb0（雅培）	HBsAb1	HBsAb2	HBcAb0（雅培）	HBcAb1	HBcAb2	HBsAg0（雅培）	HBsAb0（雅培）	HBeAg0（雅培）	HBeAb0（雅培）	HBcAb0（雅培）	HBsAg1	HBsAb1	HBeAg1	HBeAb1	HBcAb1	HBsAg2	HBsAb2	HBeAg2	HBeAb2	HBcAb2	DATE_BIRTHDAY	CITIZEN_NAME	ID_CARD_NO
0	1	2	3	3	103307310027	510502196003041922	2	53	3	3	3	1	1	3	-1	-1	2	2	160.0	58.0	75.0	22.6562	149	91	30	340.83	482.53	0.55	1.24	9.09	3.79	0	340.83	0.288	1.53	1.24	0	482.53	0.307	0.19	9.09	0	0.55	\N	\N	3.79	1960-03-04 00:00:00	钟洪玉	510502196003041922
0	2	2	3	3	103309220019	510703197603103121	2	37	2	2	2	1	1	3	1	1	1	1	150.0	50.0	72.0	22.2222	118	76	39	323.83	1001	1001	8.11	8.96	8.43	0	323.83	0.299	1.67	8.11	0	1001	0.34	1.37	8.96	0.01	1001	\N	\N	8.43	1976-03-10 00:00:00	李晓兰	510703197603103121
0	3	2	3	3	103307310026	51070219560606541X	1	57	3	3	3	1	3	3	1	2	1	1	171.0	63.1	75.1	21.5793	120	63	21	215.15	367.66	333.47	2.45	3.1	2.71	0	215.15	0.295	1.89	2.45	0	367.66	0.339	1.7	3.1	0	333.47	\N	\N	2.71	1956-06-06 00:00:00	刘兴枢	51070219560606541X
0	4	2	3	2	103308120018	510702195708275418	1	55	3	3	3	1	3	3	1	1	2	2	160.0	62.8	79.0	24.5312	142	92	77	10.54	\N	434.69	9.02	\N	8.48	0	10.54	0.302	0.73	9.02	\N	\N	\N	\N	\N	0	434.69	\N	\N	8.48	1957-08-27 00:00:00	刘兴贵	510702195708275418
0	5	2	3	2	103309190017	510702195412235441	2	58	3	3	3	1	1	3	1	1	1	1	145.0	57.2	81.0	27.2057	152	90	202	10.28	\N	61.01	7.21	\N	6.16	0	10.28	0.309	0.73	7.21	\N	\N	\N	\N	\N	0	61.01	\N	\N	6.16	1954-12-23 00:00:00	李华琼	510702195412235441
0	6	2	3	2	103308010037	510702197307045426	2	40	2	2	2	1	1	3	1	1	1	1	157.0	53.0	74.0	21.5019	138	87	18	25.03	\N	13.41	5.72	\N	5.13	0	25.03	0.294	0.79	5.72	\N	\N	\N	\N	\N	0	13.41	\N	\N	5.13	1973-07-04 00:00:00	贾琼蓉	510702197307045426
0	8	2	3	2	103308070003	510702195506305420	2	58	3	3	3	1	3	3	-1	-1	1	1	158.0	57.1	98.0	22.8729	134	84	29	1.64	\N	1.01	3.14	\N	2.52	0	1.64	0.312	0.62	3.14	\N	\N	\N	\N	\N	0	1.01	\N	\N	2.52	1955-06-30 00:00:00	梁琼珍	510702195506305420
0	9	2	3	3	103308270039	510702196807205444	2	45	2	3	2	1	3	3	1	1	1	1	150.0	54.9	76.0	24.4	103	64	26	1.9	12.97	116.13	0.56	0.53	0.51	0	1.9	0.323	1.58	0.56	0	12.97	0.3	1.68	0.53	0	116.13	\N	\N	0.51	1968-07-20 00:00:00	李元蓉	510702196807205444
0	10	2	3	3	103308030021	510702197205025416	1	41	2	2	2	1	1	3	2	1	1	1	164.0	49.6	66.0	18.4414	105	66	20	48.62	865.08	283.02	6.93	7.51	6.66	0	48.62	0.329	0.79	6.93	0	865.08	0.326	0.71	7.51	0	283.02	\N	\N	6.66	1972-05-02 00:00:00	杨勇	510702197205025416
0	11	2	3	3	103309270036	510703199108023123	2	22	1	1	1	1	1	3	1	1	1	1	155.0	49.0	70.0	20.3954	114	73	15	4.57	139.44	46.04	0.16	0.09	0.12	0	4.57	0.348	1.77	0.16	0	139.44	0.316	1.94	0.09	0	46.04	\N	\N	0.12	1991-08-02 00:00:00	赵萍	510703199108023123
0	13	2	3	2	103311020067	510702197704225420	2	36	2	2	2	1	1	3	1	1	1	1	150.0	50.2	74.0	22.3111	112	75	15	2.42	\N	1.47	0.18	\N	0.11	0	2.42	0.306	1.31	0.18	\N	\N	\N	\N	\N	0	1.47	\N	\N	0.11	1977-04-22 00:00:00	杨建	510702197704225420
0	14	2	3	2	103311030063	510921197507250213	1	38	2	2	2	1	1	3	1	1	1	1	165.0	65.7	73.0	24.1322	132	84	50	1.23	\N	3.67	0.14	\N	0.1	0	1.23	0.288	1.74	0.14	\N	\N	\N	\N	\N	0	3.67	\N	\N	0.1	1975-07-25 00:00:00	段正全	510921197507250213
0	15	2	3	3	103307310008	510702196508225445	2	47	2	3	2	1	1	3	1	1	1	1	156.0	47.0	66.0	19.313	137	73	23	221.21	1001	1001	2.17	2.81	1.86	0	221.21	0.309	1.33	2.17	0	1001	0.319	1.08	2.81	0.01	1001	\N	\N	1.86	1965-08-22 00:00:00	赵国碧	510702196508225445
0	16	2	3	3	103309200006	510525198001261132	1	33	2	2	1	1	1	3	1	1	1	1	170.0	67.0	75.0	23.1834	122	72	28	1.07	77.91	573.58	0.19	0.12	0.11	0	1.07	1.448	1.44	0.19	0	77.91	0.285	1.91	0.12	0	573.58	\N	\N	0.11	1980-01-26 00:00:00	杨帮金	510525198001261132
0	17	2	3	3	103310060024	51070319961220314X	2	16	1	1	1	1	1	3	1	1	1	1	160.0	53.4	70.0	20.8594	109	63	8	26.43	144.21	325.46	0.11	0.09	0.1	0	26.43	0.378	1.76	0.11	0	144.21	0.322	1.78	0.09	0	325.46	\N	\N	0.1	1996-12-20 00:00:00	郭欢欢	51070319961220314X
0	19	2	3	3	103310040063	51070219580205542X	2	55	3	3	3	1	2	3	1	1	1	1	145.0	53.0	88.0	25.2081	122	71	22	3.52	281.35	137.76	0.15	0.11	0.1	0	3.52	0.348	1.73	0.15	0	281.35	0.335	1.79	0.11	0	137.76	\N	\N	0.1	1958-02-05 00:00:00	徐明秀	51070219580205542X
0	20	2	3	3	103308160020	510703199707253115	1	16	1	1	1	1	1	3	1	1	1	1	180.0	55.2	60.0	17.037	125	79	30	0.19	197.29	20.61	0.06	0.16	7.35	0	0.19	0.279	1.66	0.06	0	197.29	0.304	1.92	0.16	0	20.61	\N	\N	7.35	1997-07-25 00:00:00	李栋	510703199707253115
0	21	2	3	3	103309020046	510702197307135421	2	40	2	2	2	1	1	3	1	1	1	1	152.0	59.9	80.0	25.9262	119	86	51	3.5	39.32	4.26	0.009	4.14	4.52	-2	3.5	\N	\N	0.009	0	39.32	0.32	1.04	4.14	0	4.26	\N	\N	4.52	1973-07-13 00:00:00	刘翠英	510702197307135421
0	22	2	3	3	103310150026	513437198311091928	2	29	1	1	1	1	1	3	1	1	1	1	152.0	51.5	74.0	22.2905	120	80	12	8.12	63.96	53.08	0.24	0.3	0.1	0	8.12	0.319	1.64	0.24	0	63.96	0.3	1.73	0.3	0	53.08	\N	\N	0.1	1983-11-09 00:00:00	周朝燕	513437198311091928
0	23	2	3	3	103311070044	513437195906106427	2	54	3	3	3	1	1	3	1	1	1	1	155.0	61.2	78.0	25.4735	140	83	22	0	1001	84.45	0.01	4.75	7.29	-2	0	\N	\N	0.01	0	1001	0.278	1.02	4.75	0.01	84.45	\N	\N	7.29	1959-06-10 00:00:00	刘仁定	513437195906106427
0	24	2	3	3	103308050052	510703199701153113	1	16	1	1	1	1	1	3	1	1	1	1	171.0	57.8	78.0	19.7668	99	51	35	28.19	747.2	389.63	0.13	0.07	0.08	0	28.19	0.266	1.31	0.13	0	747.2	0.32	1.67	0.07	0	389.63	\N	\N	0.08	1997-01-15 00:00:00	李俊杰	510703199701153113
0	25	2	3	3	103308040008	510727198507172747	2	28	1	1	1	1	1	3	1	1	1	1	164.0	56.1	70.0	20.8581	121	66	58	3.31	16.79	46.84	0.2	0.11	0.08	0	3.31	0.258	1.76	0.2	0	16.79	0.367	1.74	0.11	0	46.84	\N	\N	0.08	1985-07-17 00:00:00	李晴	510727198507172747
0	26	2	3	3	103308020023	510703198106073114	1	32	2	2	1	1	3	3	3	3	1	1	175.0	81.0	87.0	26.449	130	80	86	1.01	32.4	17.19	0.1	0.05	0.04	0.01	1.01	0.996	1.07	0.1	0	32.4	0.363	1.74	0.05	0	17.19	\N	\N	0.04	1981-06-07 00:00:00	周安	510703198106073114
0	27	2	3	3	103309240025	510702196310105421	2	49	2	3	2	1	1	3	1	3	1	1	155.0	49.1	74.0	20.437	98	64	33	19.05	11.85	26.65	4.85	4.37	5.21	0	19.05	0.311	1.5	4.85	0.21	11.85	1.334	1.26	4.37	0.01	26.65	\N	\N	5.21	1963-10-10 00:00:00	田玉兰	510702196310105421
0	29	2	3	3	103309270128	510703198907253123	2	24	1	1	1	1	2	3	1	1	1	1	156.0	51.2	70.0	21.0388	102	71	20	5.19	1001	232.25	0.15	0.19	0.27	0	5.19	0.301	1.83	0.15	0	1001	0.324	1.67	0.19	0	232.25	\N	\N	0.27	1989-07-25 00:00:00	郑晓蓉	510703198907253123
0	30	2	3	3	103310200033	510702197608185414	1	37	2	2	2	1	1	3	2	3	1	1	172.0	72.8	86.0	24.6079	147	77	32	0.72	3.57	22.98	0.54	0.7	0.18	0	0.72	0.2996	1.76	0.54	0	3.57	0.32	1.7	0.7	0	22.98	\N	\N	0.18	1976-08-18 00:00:00	刘荣发	510702197608185414
0	31	2	3	3	103309220059	510702196902155430	1	44	2	2	2	1	1	3	2	3	1	1	152.0	56.9	80.0	24.6278	120	71	22	9.29	283.29	20.62	0.77	0.84	0.58	0	9.29	0.302	1.74	0.77	0	283.29	0.326	1.62	0.84	0	20.62	\N	\N	0.58	1969-02-15 00:00:00	洪余银	510702196902155430
0	32	2	3	3	103308150043	510726197510090020	2	37	2	2	2	2	1	3	1	1	1	1	152.0	46.8	66.0	20.2562	101	69	35	1.32	27.06	74.51	0.15	0.1	0.08	0	1.32	0.349	1.58	0.15	0	27.06	0.345	1.71	0.1	0	74.51	\N	\N	0.08	1975-10-09 00:00:00	江利华	510726197510090020
0	34	2	3	3	103310030001	510703199411063136	1	18	1	1	1	1	2	3	-1	-1	1	1	170.2	60.5	70.0	20.8851	135	83	23	1.02	424.79	46.15	无	7.49	10.23	0	1.02	无	无	无	0	424.79	0.337	1.4	7.49	0	46.15	\N	\N	10.23	1994-11-06 00:00:00	谢锐	510703199411063136
0	35	2	3	2	103310290005	510703199703203129	2	16	1	1	1	1	1	3	-1	-1	1	1	153.0	50.0	76.0	21.3593	120	71	10	1.93	\N	27.34	0.44	\N	0.1	0	1.93	0.313	1.41	0.44	\N	\N	\N	\N	\N	0	27.34	\N	\N	0.1	1997-03-20 00:00:00	谢倩倩	510703199703203129
0	36	2	3	3	103310270026	510703199409063129	2	19	1	1	1	1	2	3	1	1	1	1	158.0	48.1	70.0	19.2677	105	60	6	2.29	42.91	4.6	2.07	0.33	0.12	0.01	2.29	0.38	1.6	2.07	0	42.91	0.298	1.77	0.33	0	4.6	\N	\N	0.12	1994-09-06 00:00:00	胡晓玲	510703199409063129
0	37	2	3	3	103310270025	510703198603133122	2	27	1	1	1	1	3	3	1	1	3	3	156.0	50.9	70.0	20.9155	108	70	24	0	1001	625.05	0.005	7.6	7.89	-2	0	\N	\N	0.005	0	1001	0.291	0.1	7.6	0	625.05	\N	\N	7.89	1986-03-13 00:00:00	胡利利	510703198603133122
0	38	2	3	3	103311100039	510703198108203111	1	32	2	2	1	1	1	3	2	2	1	1	170.0	58.9	72.0	20.3806	130	69	24	43.03	1001	136.07	8.42	7.97	7.6	0	43.03	0.436	0.55	8.42	0	1001	0.393	0.7	7.97	0	136.07	\N	\N	7.6	1981-08-20 00:00:00	李涛源	510703198108203111
0	40	2	3	3	103308010009	510702196307185424	2	50	3	3	3	1	1	3	1	1	1	1	151.0	54.5	83.0	23.9025	131	81	30	38.76	66.83	116.47	7.08	8.03	6.85	0	38.76	0.353	0.5	7.08	0	66.83	0.349	0.42	8.03	0	116.47	\N	\N	6.85	1963-07-18 00:00:00	马玉兰	510702196307185424
0	41	2	3	3	103309200069	510922197203031990	1	41	2	2	2	1	1	3	1	3	1	1	165.0	70.5	90.0	25.8953	158	110	38	56.88	301.01	67.34	6.47	6.02	5.83	0	56.88	0.297	1.35	6.47	0	301.01	0.289	1.38	6.02	0	67.34	\N	\N	5.83	1972-03-03 00:00:00	蒋军	510922197203031990
0	42	2	3	3	103309200071	510703198603213122	2	27	1	1	1	1	1	3	1	1	1	1	148.0	59.9	78.0	27.3466	101	52	11	0	14.95	9.84	0.2	0.16	0.11	0	0	0.328	1.72	0.2	0	14.95	0.321	1.39	0.16	0	9.84	\N	\N	0.11	1986-03-21 00:00:00	唐静	510703198603213122
0	43	2	3	3	103308260034	510702197612275420	2	36	2	2	2	1	1	3	1	1	1	1	150.0	57.3	78.0	25.4667	104	65	25	7.36	293.94	61.87	0.86	1.22	1.87	0	7.36	0.325	1.96	0.86	0	293.94	0.295	1.72	1.22	0	61.87	\N	\N	1.87	1976-12-27 00:00:00	胡燕	510702197612275420
0	45	2	3	3	103309040009	510702195810225433	1	54	3	3	3	1	1	3	1	2	2	2	155.0	56.7	78.0	23.6004	155	91	42	56.92	870.26	294.74	0.35	0.4	0.34	0	56.92	0.315	1.66	0.35	0	870.26	0.379	1.66	0.4	0	294.74	\N	\N	0.34	1958-10-22 00:00:00	王延银	510702195810225433
0	46	2	3	3	103308300053	510702196210175422	2	50	3	3	3	1	3	3	1	1	1	1	155.0	50.4	70.0	20.9781	112	67	69	5.9	13	4.2	0.423	0.36	0.25	0	5.9	0.311	1.5	0.423	0	13	0.339	1.64	0.36	0	4.2	\N	\N	0.25	1962-10-17 00:00:00	谭翠琼	510702196210175422
0	47	2	3	2	103309240185	510702195511205432	1	57	3	3	3	1	1	3	1	1	1	1	150.0	51.7	70.0	22.9778	115	72	20	52.9	\N	236.69	0.005	\N	4.58	0.01	52.9	\N	\N	0.005	\N	\N	\N	\N	\N	0	236.69	\N	\N	4.58	1955-11-20 00:00:00	谢申伯	510702195511205432
0	48	2	3	3	103309250062	510702196511295428	2	47	2	3	2	1	1	3	1	1	1	1	160.0	65.8	83.0	25.7031	118	75	27	7.96	27.47	13.46	2.32	3.33	1.75	0	7.96	6.52	0.9	2.32	0	27.47	0.329	1.29	3.33	0	13.46	\N	\N	1.75	1965-11-29 00:00:00	赖素英	510702196511295428
0	49	2	3	3	103308080037	510702197502085423	2	38	2	2	2	1	1	3	1	1	1	1	145.0	47.4	70.0	22.5446	138	70	24	0	0	105.01	1.73	0.09	2.23	0.02	0	\N	\N	1.73	0	0	0.319	1.85	0.09	0	105.01	\N	\N	2.23	1975-02-08 00:00:00	周秀苹	510702197502085423
0	50	2	3	3	103308220050	510702196409245424	2	48	2	3	2	1	1	3	1	1	1	1	154.0	51.2	68.0	21.5888	118	70	14	23.9	72.5	15.35	0.078	4.2	2.25	0.01	23.9	\N	\N	0.078	0	72.5	0.357	0.63	4.2	0	15.35	\N	\N	2.25	1964-09-24 00:00:00	魏银芳	510702196409245424
0	51	2	3	3	103309050021	510702197310105426	2	39	2	2	2	1	1	3	1	1	2	2	150.0	57.9	76.0	25.7333	146	100	17	0	259.58	257.58	0.982	1.18	0.84	-2	0	\N	\N	0.982	0	259.58	0.318	1.29	1.18	0	257.58	\N	\N	0.84	1973-10-10 00:00:00	赵宗碧	510702197310105426
0	52	2	3	3	103309250036	510823197404255043	2	39	2	2	2	1	1	3	2	1	1	1	156.0	55.4	78.0	22.7646	114	73	11	45.2	307.05	54.96	0.005	5.85	4.59	-2	45.2	\N	\N	0.005	0	307.05	0.306	1.41	5.85	0	54.96	\N	\N	4.59	1974-04-25 00:00:00	梁小红	510823197404255043
0	53	2	3	3	103309280088	510702195704145421	2	56	3	3	3	1	1	3	1	1	1	1	140.0	46.6	86.0	23.7755	163	76	9	0	388.97	737.77	0.292	2	2	-2	0	\N	\N	0.292	0	388.97	0.284	1.42	2	0	737.77	\N	\N	2	1957-04-14 00:00:00	田明华	510702195704145421
0	54	2	3	3	103309160077	510702195812295427	2	54	3	3	3	1	1	3	1	1	1	1	150.0	64.7	89.0	28.7556	146	86	33	0	144.52	3.24	1.64	0.09	0.17	-2	0	\N	\N	1.64	0	144.52	0.336	1.7	0.09	0	3.24	\N	\N	0.17	1958-12-29 00:00:00	唐定碧	510702195812295427
0	55	2	3	3	103308030041	510702197507245529	2	38	2	2	2	1	1	3	1	1	1	1	154.0	38.9	89.0	16.4024	103	64	13	63.9	923.51	691.5	0.005	0.04	5.95	0.02	63.9	\N	\N	0.005	0	923.51	0.327	1.45	0.04	0	691.5	\N	\N	5.95	1975-07-24 00:00:00	刘顺凤	510702197507245529
0	57	2	3	3	103309280073	510702196406105426	2	49	2	3	2	1	1	3	1	2	1	1	145.0	52.5	81.0	24.9703	126	80	42	3.5	111.89	139.4	1.8	5.92	5.28	0.02	3.5	\N	\N	1.8	0	111.89	0.394	0.99	5.92	0	139.4	\N	\N	5.28	1964-06-10 00:00:00	钟盛蓉	510702196406105426
0	58	2	3	3	103309240042	510702195510225458	1	57	3	3	3	1	1	3	2	3	1	1	155.0	47.1	78.0	19.6046	138	82	135	0	108.1	29.67	1.76	0.43	0.4	-2	0	\N	\N	1.76	0	108.1	0.309	1.63	0.43	0	29.67	\N	\N	0.4	1955-10-22 00:00:00	谢申常	510702195510225458
0	59	2	3	3	103309110012	510702196201205423	2	51	3	3	3	1	1	3	1	1	1	1	150.0	50.3	71.0	22.3556	122	69	24	75.2	188.84	87.52	1.37	1.33	5.8	0.01	75.2	\N	\N	1.37	0	188.84	0.326	1.76	1.33	0	87.52	\N	\N	5.8	1962-01-20 00:00:00	杨芳	510702196201205423
0	60	2	3	3	103309110011	510702196208095415	1	51	3	3	3	1	1	3	2	3	1	1	166.0	76.1	100.0	27.6165	124	77	34	10	1.5	2.26	0.005	9.95	8.62	-2	10	\N	\N	0.005	0	1.5	0.354	1.06	9.95	0	2.26	\N	\N	8.62	1962-08-09 00:00:00	李和武	510702196208095415
0	61	2	3	3	103308280037	510702197108045423	2	42	2	2	2	1	1	3	1	1	1	1	150.0	44.3	66.0	19.6889	107	71	21	0	24.65	19.37	1.78	9.31	9.06	0.02	0	\N	\N	1.78	0	24.65	0.359	0.17	9.31	0	19.37	\N	\N	9.06	1971-08-04 00:00:00	王申会	510702197108045423
0	63	2	3	3	103309240043	510702196102165411	1	52	3	3	3	1	1	3	2	1	1	1	165.0	65.0	85.0	23.8751	131	88	87	32.1	179.63	68.32	0.008	4.3	4.81	-2	32.1	\N	\N	0.008	0	179.63	0.311	0.73	4.3	0	68.32	\N	\N	4.81	1961-02-16 00:00:00	舒文金	510702196102165411
0	64	2	3	3	103308160017	510702196310075429	2	49	2	3	2	1	1	3	1	1	1	1	152.0	54.0	76.0	23.3726	113	70	14	0	179.14	35.87	1.92	4.07	3.55	-2	0	\N	\N	1.92	0	179.14	0.328	1.41	4.07	0	35.87	\N	\N	3.55	1963-10-07 00:00:00	余佩琼	510702196310075429
0	65	2	3	3	103309160123	51070219550106543X	1	58	3	3	3	1	1	3	2	2	1	1	155.0	53.2	78.0	22.1436	158	93	79	0	193.54	11.52	0.005	1.41	1.24	-2	0	\N	\N	0.005	0	193.54	0.332	1.49	1.41	0	11.52	\N	\N	1.24	1955-01-06 00:00:00	邓从寿	51070219550106543X
0	66	2	3	3	103309280077	51070219710117541X	1	42	2	2	2	1	1	3	2	2	1	1	161.0	56.8	77.0	21.9127	123	77	98	102.3	1001	1001	0.005	4.89	4.83	-2	102.3	\N	\N	0.005	0	1001	0.32	0.63	4.89	0	1001	\N	\N	4.83	1971-01-17 00:00:00	贾明先	51070219710117541X
0	67	2	3	2	103309060049	510702195605275423	2	57	3	3	3	1	1	3	1	1	2	2	152.0	71.5	90.0	30.947	145	91	42	0	\N	33	1.59	\N	0.16	0.01	0	\N	\N	1.59	\N	\N	\N	\N	\N	0	33	\N	\N	0.16	1956-05-27 00:00:00	李玉凤	510702195605275423
0	68	2	3	2	103309220052	510702195701195423	2	56	3	3	3	1	1	3	1	1	1	1	155.0	64.8	90.0	26.9719	142	63	50	222	\N	97.97	0.005	\N	4.08	-2	222	\N	\N	0.005	\N	\N	\N	\N	\N	0	97.97	\N	\N	4.08	1957-01-19 00:00:00	谢秀兰	510702195701195423
0	70	2	3	3	103310080024	513437198008266422	2	33	2	2	1	1	1	3	1	1	1	1	152.0	54.7	76.0	23.6756	100	69	23	11.7	152.94	0.76	0.903	8.09	0.13	0.02	11.7	\N	\N	0.903	0	152.94	0.32	0.68	8.09	0	0.76	\N	\N	0.13	1980-08-26 00:00:00	胡常容	513437198008266422
0	71	2	3	3	103309040019	51070219560810542X	2	57	3	3	3	1	1	3	1	1	2	2	150.0	50.3	80.0	22.3556	143	82	23	4	94.39	215.31	0.005	8.27	7.04	0.01	4	\N	\N	0.005	0	94.39	0.314	0.01	8.27	0	215.31	\N	\N	7.04	1956-08-10 00:00:00	谢碧英	51070219560810542X
0	72	2	3	3	103307310044	510702196810265421	2	44	2	2	2	1	3	3	1	1	1	1	150.0	47.1	67.0	20.9333	121	76	49	0	52.77	78.1	1.94	7.59	7.11	0.01	0	\N	\N	1.94	0	52.77	0.331	1.5	7.59	0	78.1	\N	\N	7.11	1968-10-26 00:00:00	陈晓清	510702196810265421
0	73	2	3	3	103310040186	512925197203043829	2	41	2	2	2	1	3	3	1	1	1	1	154.0	49.1	68.0	20.7033	123	79	19	6.4	564.48	32.43	0.005	3.48	3.98	0.01	6.4	\N	\N	0.005	0	564.48	0.353	1.4	3.48	0	32.43	\N	\N	3.98	1972-03-04 00:00:00	黄春芬	512925197203043829
0	74	2	3	1	103309020056	510725198911174514	1	23	1	1	1	1	1	3	2	2	1	1	166.0	63.0	80.6	22.8625	120	78	21	3.7	6.65	\N	0.005	0.05	\N	0.04	3.7	\N	\N	0.005	0	6.65	0.333	1.95	0.05	\N	\N	\N	\N	\N	1989-11-17 00:00:00	苏东	510725198911174514
0	75	2	3	3	103309230104	510702196703125423	2	46	2	3	2	1	1	3	1	1	1	1	155.0	49.8	72.0	20.7284	118	79	22	63.1	55.87	39.86	0.005	6.72	7.32	-2	63.1	\N	\N	0.005	0	55.87	0.3	0.63	6.72	0	39.86	\N	\N	7.32	1967-03-12 00:00:00	刘冬梅	510702196703125423
0	77	2	3	2	103311070014	510702196209275418	1	51	3	3	3	1	1	3	2	3	1	1	145.0	59.8	100.0	28.4423	175	96	32	26.9	\N	71.5	0.005	\N	3.65	-2	26.9	\N	\N	0.005	\N	\N	\N	\N	\N	0	71.5	\N	\N	3.65	1962-09-27 00:00:00	曾乐金	510702196209275418
0	78	2	3	3	103308060028	510702197504225418	1	38	2	2	2	1	1	3	1	1	1	1	166.0	62.0	86.0	22.4996	131	76	68	4.3	3.952	4.17	0.005	10.32	9.14	0.01	4.3	\N	\N	0.005	0	3.952	0.398	0.38	10.32	0	4.17	\N	\N	9.14	1975-04-22 00:00:00	李奎	510702197504225418
0	79	2	3	3	103308050058	510702197503145424	2	38	2	2	2	1	3	3	1	1	1	1	150.0	61.2	82.0	27.2	104	68	22	6.1	23.28	199.48	0.007	9.82	8.43	0.01	6.1	\N	\N	0.007	0	23.28	0.391	0.84	9.82	0	199.48	\N	\N	8.43	1975-03-14 00:00:00	周秀凤	510702197503145424
0	80	2	3	2	103309030023	510702197011115421	2	42	2	2	2	1	1	3	1	1	1	1	150	55.2	75.0	24.5333	125	66	53	2.3	\N	142.62	1.89	\N	0.09	-2	2.3	\N	\N	1.89	\N	\N	\N	\N	\N	0	142.62	\N	\N	0.09	1970-11-11 00:00:00	彭小兰	510702197011115421
0	81	2	3	3	103309030088	510702196608035411	1	47	2	3	2	1	1	3	2	2	1	1	165.0	71.1	92.0	26.1157	107	62	118	0	1001	303.97	0.005	5.87	5.16	0.01	0	\N	\N	0.005	0	1001	0.339	0.75	5.87	0	303.97	\N	\N	5.16	1966-08-03 00:00:00	郭诚	510702196608035411
0	82	2	3	3	103309170111	510702196503105428	2	48	2	3	2	1	1	3	1	1	1	1	148.0	46.2	70.0	21.092	108	62	49	0	5.57	3.99	1.74	0.07	0.07	0.01	0	\N	\N	1.74	0	5.57	0.358	1.78	0.07	0	3.99	\N	\N	0.07	1965-03-10 00:00:00	孙德琼	510702196503105428
0	83	2	3	3	103309110001	51070219761129542X	2	36	2	2	2	1	1	3	1	1	1	1	155.0	49.8	70.0	20.7284	121	79	30	0	32.42	4.14	0.005	7.74	6.87	0.02	0	\N	\N	0.005	0	32.42	0.287	0.99	7.74	0	4.14	\N	\N	6.87	1976-11-29 00:00:00	杨元惠	51070219761129542X
0	84	2	3	3	103308200012	510722198606192741	2	27	1	1	1	1	1	3	-1	-1	1	1	165.0	60.6	67.0	22.259	104	73	13	0	7.95	433.42	1.55	10.36	0.22	0.01	0	\N	\N	1.55	2.15	7.95	5.705	1.49	10.36	0	433.42	\N	\N	0.22	1986-06-19 00:00:00	黄艳	510722198606192741
0	86	2	3	3	103308100041	510702196704275423	2	46	2	3	2	1	1	3	1	1	1	1	154.0	69.7	100.0	29.3894	119	74	17	0	37.29	1001	1.73	9.86	1.81	-2	0	\N	\N	1.73	0	37.29	0.317	1.31	9.86	0	1001	\N	\N	1.81	1967-04-27 00:00:00	凌琼兰	510702196704275423
0	87	2	3	3	103309230039	510702197506075521	2	38	2	2	2	1	1	3	1	2	1	1	155.0	57.0	80.0	23.7253	108	75	17	9.7	45.19	106.5	0.005	8.67	7.66	0.01	9.7	\N	\N	0.005	0	45.19	0.371	0.85	8.67	0	106.5	\N	\N	7.66	1975-06-07 00:00:00	米英	510702197506075521
0	88	2	3	3	103311140003	510702196409055516	1	49	2	3	2	1	1	3	-1	-1	1	1	158.0	57.9	80.0	23.1934	125	80	22	11.3	1001	983.11	0.006	0.09	4.81	0.02	11.3	\N	\N	0.006	0	1001	0.334	1.39	0.09	0	983.11	\N	\N	4.81	1964-09-05 00:00:00	周尚玉	510702196409055516
0	89	2	3	3	103309240027	510702197204095420	2	41	2	2	2	1	1	3	1	1	1	1	160.0	60.2	84.0	23.5156	122	70	18	150.6	1001	657.17	1.7	0.14	0.13	-2	150.6	\N	\N	1.7	0	1001	0.334	1.55	0.14	0	657.17	\N	\N	0.13	1972-04-09 00:00:00	马秀英	510702197204095420
0	90	2	3	3	103308100025	510702196409235429	2	48	2	3	2	1	1	3	1	2	1	1	154.0	62.3	86.0	26.2692	124	74	77	0	10.08	23.86	1.58	0.11	0.18	0.01	0	\N	\N	1.58	0	10.08	0.323	1.93	0.11	0	23.86	\N	\N	0.18	1964-09-23 00:00:00	张蓉	510702196409235429
0	91	2	3	3	103307310047	51070319890409311X	1	24	1	1	1	1	3	3	-1	-1	1	1	164.0	48.1	62.0	17.8837	125	64	40	37.2	1001	1001	0.005	8.81	8.59	0.01	37.2	\N	\N	0.005	0	1001	0.292	0.07	8.81	0	1001	\N	\N	8.59	1989-04-09 00:00:00	何章	51070319890409311X
0	92	2	3	3	103308300010	51070219620422542X	2	51	3	3	3	1	1	3	1	1	1	1	150.0	59.2	78.0	26.3111	120	74	43	15.9	572.1	48.92	1.94	0.88	0.78	-2	15.9	\N	\N	1.94	0	572.1	0.329	1.06	0.88	0	48.92	\N	\N	0.78	1962-04-22 00:00:00	谢丽华	51070219620422542X
0	93	2	3	3	103311080017	51070219710301541X	1	42	2	2	2	1	1	3	2	3	1	1	170.0	62.5	80.0	21.6263	117	84	48	244.4	1001	1001	1.91	1.56	0.94	-2	244.4	\N	\N	1.91	0	1001	0.341	1.26	1.56	0	1001	\N	\N	0.94	1971-03-01 00:00:00	周斌	51070219710301541X
0	94	2	3	3	103310160002	511028197209167047	2	41	2	2	2	1	1	3	-1	-1	1	1	158.0	62.7	84.0	25.1162	112	72	23	812.1	210.36	385.39	0.006	0.19	4.68	0.01	812.1	\N	\N	0.006	0	210.36	0.325	1.82	0.19	0	385.39	\N	\N	4.68	1972-09-16 00:00:00	谢世群	511028197209167047
0	95	2	3	3	103309030029	510702197408215412	1	39	2	2	2	1	1	3	-1	-1	1	1	165.0	51.9	68.0	19.0634	111	74	20	56	1001	150.48	1.84	4.9	6.56	-2	56	\N	\N	1.84	0	1001	0.329	0.83	4.9	0.01	150.48	\N	\N	6.56	1974-08-21 00:00:00	李小军	510702197408215412
0	96	2	3	3	103311020055	510702196804115523	2	45	2	3	2	1	1	3	-1	-1	2	2	158.0	62.2	82.0	24.9159	188	113	8	0	322.7	224.39	1.96	0.34	0.34	-2	0	\N	\N	1.96	0	322.7	0.349	0.74	0.34	0.01	224.39	\N	\N	0.34	1968-04-11 00:00:00	肖青秀	510702196804115523
0	97	2	3	3	103311030065	510724198611232448	2	26	1	1	1	1	1	3	-1	-1	1	1	163.0	53.4	74.0	20.0986	116	57	4	0	396.74	5.01	0.848	10.13	7.76	-2	0	\N	\N	0.848	0	396.74	0.319	0.25	10.13	0	5.01	\N	\N	7.76	1986-11-23 00:00:00	魏杨荭	510724198611232448
0	99	2	3	3	103311020010	510702197601215529	2	37	2	2	2	1	1	3	-1	-1	1	1	152.0	63.3	86.0	27.3979	126	67	16	0	7.34	1.31	1.77	0.43	0.13	0.02	0	\N	\N	1.77	0	7.34	0.326	1.63	0.43	0.02	1.31	\N	\N	0.13	1976-01-21 00:00:00	蒋琼英	510702197601215529
0	100	2	3	3	103309050034	510702195810085418	1	54	3	3	3	1	1	3	2	3	1	1	155.0	55.3	76.0	23.0177	132	73	64	0	311.06	265.39	0.005	5.08	4.99	0.02	0	\N	\N	0.005	0	311.06	0.322	0.142	5.08	0	265.39	\N	\N	4.99	1958-10-08 00:00:00	吴代金	510702195810085418
0	101	2	3	3	103309170073	510702197105015421	2	42	2	2	2	1	1	3	1	1	1	1	157.0	59.3	80.0	24.0578	112	70	13	0	31.31	17.6	1.79	0.15	0.14	0.01	0	\N	\N	1.79	0	31.31	0.343	1.7	0.15	0	17.6	\N	\N	0.14	1971-05-01 00:00:00	李凤铭	510702197105015421
0	102	2	3	3	103310070016	510726196710292837	1	45	2	3	2	1	1	3	1	1	1	1	174.0	81.6	96.0	26.952	121	79	27	0	785.49	173.75	2.01	1.46	1.91	0.01	0	\N	\N	2.01	0	785.49	0.299	1.93	1.46	0	173.75	\N	\N	1.91	1967-10-29 00:00:00	王德斌	510726196710292837
0	103	2	3	3	103310050040	510702197206055529	2	41	2	2	2	1	1	3	1	1	1	1	153.0	66.2	88.0	28.2797	131	81	19	45.2	1001	50.84	1.89	4.53	4.14	0.01	45.2	\N	\N	1.89	0	1001	0.313	1.37	4.53	0	50.84	\N	\N	4.14	1972-06-05 00:00:00	王英	510702197206055529
0	104	2	3	3	103310060013	522321199606282827	2	17	1	1	1	1	1	3	-1	-1	1	1	173.0	59.0	72.0	19.7133	120	77	11	0	1001	959.92	1.82	0.19	7.31	0.01	0	\N	\N	1.82	0	1001	0.293	2.01	0.19	0.04	959.92	\N	\N	7.31	1996-06-28 00:00:00	卓华芬	522321199606282827
0	106	2	3	3	103311020035	510702196509295525	2	48	2	3	2	1	1	3	-1	-1	1	1	155.0	56.5	76.0	23.5172	142	81	13	69.3	0	89.09	0.005	3.11	2.47	0.01	69.3	\N	\N	0.005	0	0	0.309	1.4	3.11	0.01	89.09	\N	\N	2.47	1965-09-29 00:00:00	郭晓蓉	510702196509295525
0	107	2	3	3	103311030011	510702197006125529	2	43	2	2	2	1	1	3	-1	-1	1	1	155.0	62.7	86.0	26.0978	148	84	10	124.4	245.16	29.09	1.84	8.4	7.52	-2	124.4	\N	\N	1.84	0	245.16	0.311	0.77	8.4	0	29.09	\N	\N	7.52	1970-06-12 00:00:00	王用美	510702197006125529
0	108	2	3	3	103309200047	510702196411045421	2	48	2	3	2	1	1	3	1	1	1	1	150.0	45.5	75.0	20.2222	112	80	57	4.7	453.41	44.39	2.05	7.51	7	0.02	4.7	\N	\N	2.05	0	453.41	0.353	0.54	7.51	0	44.39	\N	\N	7	1964-11-04 00:00:00	李玉琼	510702196411045421
0	109	2	3	3	103309200046	510702196305145410	1	50	3	3	3	1	1	3	3	3	1	1	165.0	66.5	88.0	24.4261	89	72	32	8.8	1001	189.26	1.9	0.3	0.12	-2	8.8	\N	\N	1.9	0	1001	0.316	1.57	0.3	0	189.26	\N	\N	0.12	1963-05-14 00:00:00	程应全	510702196305145410
0	110	2	3	3	103309170006	510702196612155416	1	46	2	3	2	1	1	3	2	3	1	1	155.0	49.8	77.0	20.7284	103	70	19	3	16.73	3.54	1.8	0.07	0.1	0.02	3	\N	\N	1.8	0	16.73	0.315	1.8	0.07	0.04	3.54	\N	\N	0.1	1966-12-15 00:00:00	黄云坤	510702196612155416
0	111	2	3	3	103308020033	510702196304155414	1	50	3	3	3	1	1	3	2	3	1	1	165.0	71.5	90.0	26.2626	140	92	31	75.2	250.53	76.35	1.37	0.23	0.17	0.01	75.2	\N	\N	1.37	0	250.53	0.343	1.86	0.23	0	76.35	\N	\N	0.17	1963-04-15 00:00:00	周季春	510702196304155414
0	112	2	3	3	103309250004	510702196107285455	1	52	3	3	3	1	2	3	2	2	1	1	170.0	65.1	80.0	22.526	115	80	149	0	50.97	52.49	1.78	4.42	4.13	0.02	0	\N	\N	1.78	0	50.97	0.317	1.15	4.42	0	52.49	\N	\N	4.13	1961-07-28 00:00:00	赵德成	510702196107285455
0	113	2	3	3	103310040130	510703199005213127	2	23	1	1	1	1	2	3	1	1	1	1	155.0	48.0	68.0	19.9792	125	74	14	0	1.85	678.51	1.92	0.14	0.6	0.02	0	\N	\N	1.92	0	1.85	0.299	1.88	0.14	0	678.51	\N	\N	0.6	1990-05-21 00:00:00	杨佳佳	510703199005213127
0	114	2	3	3	103310040131	510702197102095024	2	42	2	2	2	1	1	3	1	1	1	1	150.0	58.8	86.0	26.1333	120	73	72	561.1	1001	598.99	0.005	8.09	7.57	0.02	561.1	\N	\N	0.005	0	1001	0.282	0.2	8.09	0	598.99	\N	\N	7.57	1971-02-09 00:00:00	曾方玉	510702197102095024
0	115	2	3	3	103309230021	510702196904205411	1	44	2	2	2	1	1	3	2	3	1	1	162.0	77.7	95.0	29.6068	154	109	196	8.4	1001	108.92	0.035	2.87	2.27	0.03	8.4	\N	\N	0.035	0.02	1001	0.31	1.36	2.87	0	108.92	\N	\N	2.27	1969-04-20 00:00:00	谢正地	510702196904205411
0	116	2	3	3	103308010083	510703198210293117	1	30	2	2	1	1	3	3	-1	-1	1	1	166.0	63.7	80.0	23.1166	125	77	26	0	17.49	10.69	1.92	0.09	0.12	-2	0	\N	\N	1.92	0	17.49	0.348	1.78	0.09	0	10.69	\N	\N	0.12	1982-10-29 00:00:00	范金	510703198210293117
0	118	2	3	3	103312210020	510702197001195421	2	43	2	2	2	1	1	3	-1	-1	1	1	155.0	53.5	76.0	22.2685	151	86	25	15.7	1001	256.37	1.78	5.94	4.24	0.01	15.7	\N	\N	1.78	0	1001	0.285	0.95	5.94	0	256.37	\N	\N	4.24	1970-01-19 00:00:00	周春兰	510702197001195421
0	119	2	3	3	103309110004	51070219701007543X	1	42	2	2	2	1	1	3	1	3	1	1	170.0	63.9	78.0	22.1107	106	72	10	10	63.69	26.41	0.005	7.35	5.94	-2	10	\N	\N	0.005	0	63.69	0.329	0.78	7.35	0	26.41	\N	\N	5.94	1970-10-07 00:00:00	李宏	51070219701007543X
0	120	2	3	3	103310040114	510703198002053127	2	33	2	2	1	1	3	3	1	1	1	1	152.0	49.5	66.0	21.4249	113	82	15	0	5.19	32.49	1.9	0.19		0.01	0	\N	\N	1.9	0	5.19	0.321	1.85	0.19	0	32.49	\N	\N		1980-02-05 00:00:00	周晓丽	510703198002053127
0	121	2	3	3	103310110017	510703198908083111	1	24	1	1	1	1	1	3	2	2	1	1	170.0	55.5	70.0	19.2042	118	81	32	280.9	1001	1001	0.005	0.17	0.15	-2	280.9	\N	\N	0.005	0	1001	0.318	1.61	0.17	0	1001	\N	\N	0.15	1989-08-08 00:00:00	钟健	510703198908083111
0	123	2	3	3	103309110086	510702196611035420	2	46	2	3	2	1	1	3	1	1	1	1	160.0	59.9	80.0	23.3984	125	86	26	0	27.91	77.54	1.96	7.15	6.59	0.01	0	\N	\N	1.96	0	27.91	0.296	1.21	7.15	0	77.54	\N	\N	6.59	1966-11-03 00:00:00	周翠云	510702196611035420
0	124	2	3	3	103310270029	510703198402282623	2	29	1	1	1	1	3	3	-1	-1	1	1	161.0	55.0	66.0	21.2183	120	69	14	0	1001	95.09	1.85	0.39	0.21	0.01	0	\N	\N	1.85	0	1001	0.334	1.86	0.39	0	95.09	\N	\N	0.21	1984-02-28 00:00:00	王丹丹	510703198402282623
0	126	2	3	3	103311030051	510702196208055528	2	51	3	3	3	1	1	3	1	1	1	1	145.0	61.2	98.0	29.1082	171	94	24	0	421.86	86.25	1.88	0.4	0.1	0.01	0	\N	\N	1.88	0	421.86	0.286	1.74	0.4	0	86.25	\N	\N	0.1	1962-08-05 00:00:00	王汝琼	510702196208055528
0	127	2	3	3	103310300015	510702196207185523	2	51	3	3	3	1	1	3	-1	-1	1	1	152.0	53.0	78.0	22.9398	144	86	16	296.6	121.93	75.94	0.005	9.06	8.64	0.02	296.6	\N	\N	0.005	0	121.93	0.311	1.28	9.06	0.69	75.94	\N	\N	8.64	1962-07-18 00:00:00	纪玉琼	510702196207185523
0	128	2	3	3	103309160072	510702196208025425	2	51	3	3	3	1	1	3	1	1	1	1	158.0	59.2	85.0	23.7141	136	85	51	0	38.42	15.09	1.86	0.11	0.13	-2	0	\N	\N	1.86	0	38.42	0.344	1.67	0.11	0	15.09	\N	\N	0.13	1962-08-02 00:00:00	罗兴凤	510702196208025425
0	129	2	3	3	103309030028	510702196206065423	2	51	3	3	3	1	1	3	1	1	1	1	155.0	54.8	73.0	22.8096	121	89	16	0	234.09	394.8	1.94	4.76	4.23	0.02	0	\N	\N	1.94	0	234.09	0.3	1.48	4.76	0	394.8	\N	\N	4.23	1962-06-06 00:00:00	赵宗英	510702196206065423
0	130	2	3	3	103309110058	510702195905145428	2	54	3	3	3	1	1	3	1	1	1	1	130.0	38.5	78.0	22.7811	129	69	29	1.36	6.51	2.69	8.08	9.45	8.51	0.02	1.36	0.338	0.73	8.08	0	6.51	0.388	0.76	9.45	0	2.69	\N	\N	8.51	1959-05-14 00:00:00	赖素华	510702195905145428
0	131	2	3	3	103310050053	510703199412093126	2	18	1	1	1	1	1	3	-1	-1	1	1	150.0	44.0	63.0	19.5556	113	74	5	2.3	419.78	106.91	1.64	0.14	0.11	-2	2.3	\N	\N	1.64	0	419.78	0.304	1.85	0.14	0	106.91	\N	\N	0.11	1994-12-09 00:00:00	李柯欣	510703199412093126
0	132	2	3	1	103308010069	510702197212055445	2	40	2	2	2	1	3	3	1	1	1	1	164.0	54.3	70.0	20.1889	123	77	62	0.89	156.31	\N	4.41	3.88	\N	0	0.89	0.386	1.37	4.41	0	156.31	0.301	1.62	3.88	\N	\N	\N	\N	\N	1972-12-05 00:00:00	郭述兰	510702197212055445
0	135	2	3	3	103308220030	510623198203077926	2	31	2	2	1	1	1	3	1	2	1	1	161.0	55.4	70.0	21.3726	120	87	24	7.69	115.1	99.52	0.41	0.302	0.3	0	7.69	0.366	1.66	0.41	0	115.1	0.302	1.42	0.302	0	99.52	\N	\N	0.3	1982-03-07 00:00:00	欧蓉	510623198203077926
0	137	2	3	3	103310060025	510703198708253286	2	26	1	1	1	1	1	3	1	1	1	1	160.0	57.2	72.0	22.3437	114	76	19	6.1	56.06	29.34	0.005	9.21	7.89	-2	6.1	\N	\N	0.005	0	56.06	0.325	0.31	9.21	0.02	29.34	\N	\N	7.89	1987-08-25 00:00:00	董晓丽	510703198708253286
0	138	2	3	3	103310270031	510702197505205427	2	38	2	2	2	1	1	3	1	1	1	1	160.0	69.0	81.0	26.9531	122	72	10	83.6	930.36	374.64	0.007	2.57	7.16	0.02	83.6	\N	\N	0.007	0	930.36	0.293	1.46	2.57	0.02	374.64	\N	\N	7.16	1975-05-20 00:00:00	谢春燕	510702197505205427
0	139	2	3	3	103310040123	510702195612215410	1	56	3	3	3	1	1	3	2	1	1	1	155.0	62.5	90.0	26.0146	139	76	51	35.2	40.59	44.95	1.69	0.08	0.1	0.01	35.2	\N	\N	1.69	0	40.59	0.332	1.69	0.08	0	44.95	\N	\N	0.1	1956-12-21 00:00:00	刘兴科	510702195612215410
0	140	2	3	3	103309030035	510702195602115424	2	57	3	3	3	1	1	3	1	1	1	1	160.0	60.6	74.0	23.6719	116	83	74	4.44	1001	34.3	6.79	7.66	7.41	0	4.44	0.321	0.78	6.79	0	1001	0.327	0.61	7.66	0	34.3	\N	\N	7.41	1956-02-11 00:00:00	李成静	510702195602115424
0	142	2	3	3	103309220031	510702196208125418	1	51	3	3	3	1	1	3	2	3	2	2	155.0	64.1	82.0	26.6805	149	101	33	4.4	4.31	6.51	2.8	4.28	2.28	0	4.4	0.274	1.26	2.8	0.53	4.31	2.121	0.05	4.28	0	6.51	\N	\N	2.28	1962-08-12 00:00:00	李正伦	510702196208125418
0	144	2	3	3	103308280054	510702196209125428	2	50	3	3	3	1	1	3	1	1	2	2	145.0	57.2	80.0	27.2057	152	90	169	6.12	880.24	15.73	7.83	7.73	7.34	0	6.12	0.28	1.3	7.83	0	880.24	0.303	1.69	7.73	0	15.73	\N	\N	7.34	1962-09-12 00:00:00	余琼珍	510702196209125428
0	145	2	3	3	103309040021	510702195804195426	2	55	3	3	3	1	1	3	1	1	1	1	150.0	64.7	88.0	28.7556	132	70	23	4.7	1.33	161.43	0.667	1.07	0.98	0.02	4.7	\N	\N	0.667	0	1.33	0.325	1.17	1.07	0	161.43	\N	\N	0.98	1958-04-19 00:00:00	林琼华	510702195804195426
0	146	2	3	3	103309020010	510702195803195416	1	55	3	3	3	1	1	3	1	2	1	1	164.0	56.1	72.0	20.8581	109	72	142	1.48	2.22	30.41	5.47	4.65	4.73	0	1.48	0.345	1.44	5.47	0.01	2.22	0.324	1.45	4.65	0.04	30.41	\N	\N	4.73	1958-03-19 00:00:00	谢申太	510702195803195416
0	147	2	3	2	103309300065	510702197701095413	1	36	2	2	2	1	1	3	1	1	1	1	156.0	69.4	92.0	28.5174	135	84	66	120.19	\N	413.48	9.56	\N	9.27	0	120.19	0.293	0.37	9.56	\N	\N	\N	\N	\N	0.01	413.48	\N	\N	9.27	1977-01-09 00:00:00	谢勇	510702197701095413
0	148	2	3	3	103311070021	510702197101075435	1	42	2	2	2	1	1	3	2	2	1	1	160.0	66.2	81.0	25.8594	134	88	25	3	114.28	5.62	0.006	5.57	4.52	0.01	3	\N	\N	0.006	0	114.28	0.335	0.89	5.57	0	5.62	\N	\N	4.52	1971-01-07 00:00:00	雷斌	510702197101075435
3	149	2	3	2	103309280148	510703198602263128	2	27	1	1	1	1	1	3	1	1	1	1	155.0	52.0	79.0	21.6441	105	75	15	0	\N	1.69	1.97	\N	0.09	-2	0	\N	\N	1.97	\N	\N	\N	\N	\N	0	1.69	\N	\N	0.09	1986-02-26 00:00:00	李丽	510703198602263128
0	150	2	3	3	103309060080	510702196206265425	2	51	3	3	3	1	1	3	1	1	1	1	154.0	69.1	90.0	29.1364	123	77	38	115.19	1001	188.52	4.84	4.41	3.36	0	115.19	0.328	0.95	4.84	0	1001	0.313	1.22	4.41	0	188.52	\N	\N	3.36	1962-06-26 00:00:00	郭凤珍	510702196206265425
0	151	2	3	3	103309230101	510702195606215414	1	57	3	3	3	1	1	3	2	1	1	1	155.0	60.0	82.0	24.974	134	82	48	1.63	0.82	93.74	4.5	4.7	0.16	0.04	1.63	0.351	1.35	4.5	0.01	0.82	0.359	1.4	4.7	0	93.74	\N	\N	0.16	1956-06-21 00:00:00	何远贵	510702195606215414
0	152	2	3	3	103309230100	510702195604065424	2	57	3	3	3	1	1	3	1	1	1	1	155.0	59.6	80.0	24.8075	124	82	23	11.84	65.16	29.66	4.41	4.76	4.21	0	11.84	0.323	0.65	4.41	0	65.16	0.293	0.69	4.76	0	29.66	\N	\N	4.21	1956-04-06 00:00:00	付桂英	510702195604065424
0	153	2	3	3	103309130032	51060219761013512X	2	36	2	2	2	1	1	3	1	1	1	1	150.0	45.2	70.0	20.0889	99	58	10	64.63	867.25	1001	2.39	4.7	2.46	0	64.63	0.295	1.42	2.39	0	867.25	0.29	1.34	4.7	0	1001	\N	\N	2.46	1976-10-13 00:00:00	谢家燕	51060219761013512X
0	154	2	3	3	103308290095	510703198501103117	1	28	1	1	1	1	1	3	2	1	1	1	172.0	76.7	89.0	25.9262	133	77	47	14.1	1001	136.45	5.69	6.38	6.27	0	14.1	0.322	0.77	5.69	0	1001	0.315	0.8	6.38	0	136.45	\N	\N	6.27	1985-01-10 00:00:00	郭明健	510703198501103117
0	155	2	3	2	103309200004	510702196811215522	2	44	2	2	2	1	1	3	1	1	1	1	155.0	54.4	77.0	22.6431	125	78	22	32.52	\N	1001	0.47	\N	0.23	0	32.52	0.281	0.65	0.47	\N	\N	\N	\N	\N	0	1001	\N	\N	0.23	1968-11-21 00:00:00	邓先英	510702196811215522
0	157	2	3	3	103309200003	510703198912053118	1	23	1	1	1	1	1	3	1	1	1	1	165.0	48.7	72.0	17.888	113	73	24	92.17	642.63	355.67	0.35	0.25	0.26	0	92.17	0.321	1.7	0.35	0	642.63	0.361	1.69	0.25	0	355.67	\N	\N	0.26	1989-12-05 00:00:00	崔平	510703198912053118
0	158	2	3	2	103312220005	510703198705053115	1	26	1	1	1	1	1	3	1	1	1	1	170.0	65.0	70.0	22.4913	146	78	26	1	\N	5.22	0.26	\N	0.24	0	1	0.304	1.5	0.26	\N	\N	\N	\N	\N	0	5.22	\N	\N	0.24	1987-05-05 00:00:00	李尚清	510703198705053115
3	159	2	3	2	103310120020	51070319881119312X	2	24	1	1	1	1	1	3	1	1	1	1	150.0	42.4	66.0	18.8444	112	72	12	0.43	\N	80.49	0.1	\N	0.23	0	0.43	0.278	1.06	0.1	\N	\N	\N	\N	\N	0	80.49	\N	\N	0.23	1988-11-19 00:00:00	邓雪琳	51070319881119312X
0	160	2	3	3	103308030084	510702196502275433	1	48	2	3	2	1	1	3	2	3	1	1	152.0	50.5	77.0	21.8577	134	80	74	3.7	78.11	18.16	0.007	4.53	3.86	0.01	3.7	\N	\N	0.007	0	78.11	0.306	1.38	4.53	0.01	18.16	\N	\N	3.86	1965-02-27 00:00:00	赖顺儒	510702196502275433
0	161	2	3	2	103311080019	510702197511155518	1	37	2	2	2	1	1	3	-1	-1	1	1	170.0	57.0	76.0	19.7232	132	89	13	27.05	\N	45.64	8.63	\N	7.77	0.02	27.05	0.301	1.56	8.63	\N	\N	\N	\N	\N	0	45.64	\N	\N	7.77	1975-11-15 00:00:00	周尚斌	510702197511155518
0	162	2	3	3	103309260104	510702196708035419	1	46	2	3	2	1	1	3	1	2	2	2	160.0	63.7	83.0	24.8828	176	100	46	6.5	137.22	31.74	0.575	1.32	1.2	0.01	6.5	\N	\N	0.575	0	137.22	0.311	1.51	1.32	0	31.74	\N	\N	1.2	1967-08-03 00:00:00	赖成保	510702196708035419
0	163	2	3	3	103309250042	510702196111255427	2	51	3	3	3	1	1	3	1	1	1	1	150.0	61.5	85.0	27.3333	125	64	23	5.87	7.84	3	6.59	7.3	5.28	0.01	5.87	0.316	0.72	6.59	0	7.84	0.361	0.63	7.3	0	3	\N	\N	5.28	1961-11-25 00:00:00	顾翠莲	510702196111255427
0	164	2	3	3	103311040043	510722198305127364	2	30	2	2	1	1	1	3	-1	-1	1	1	165.0	76.5	90.0	28.0992	126	83	23	31.66	477	86.92	4.73	5.66	7.09	0	31.66	0.331	1.45	4.73	0	477	0.309	1.44	5.66	0.04	86.92	\N	\N	7.09	1983-05-12 00:00:00	邓丽萍	510722198305127364
0	165	2	3	3	103311040044	510703198212173119	1	30	2	2	1	1	2	3	-1	-1	1	1	155.0	55.6	76.0	23.1426	137	96	63	85.82	901.08	281.5	6.41	7.63	8.05	0.02	85.82	0.388	0.36	6.41	0	901.08	0.271	0.21	7.63	0	281.5	\N	\N	8.05	1982-12-17 00:00:00	周斌	510703198212173119
0	167	2	3	3	103309210027	510702196103295410	1	52	3	3	3	1	1	3	2	1	1	1	170.0	62.3	82.0	21.5571	111	78	33	14.3	67	28.78	0.005	9.44	8.77	0.02	14.3	\N	\N	0.005	0	67	0.358	1.19	9.44	0	28.78	\N	\N	8.77	1961-03-29 00:00:00	廖绪光	510702196103295410
0	168	2	3	3	103311020054	510702197109015541	2	42	2	2	2	1	1	3	-1	-1	1	1	152.0	46.6	72.0	20.1697	106	76	6	83.4	1001	1001	5.93	6.9	5.68	0.02	83.4	0.367	1.5	5.93	0	1001	0.35	1.49	6.9	0	1001	\N	\N	5.68	1971-09-01 00:00:00	何会蓉	510702197109015541
0	170	2	3	3	103309200011	510703198502173125	2	28	1	1	1	1	1	3	1	1	1	1	162.0	55.6	68.0	21.1858	125	66	11	0	28.67	0.24	1.76	0.09	0.14	-2	0	\N	\N	1.76	0	28.67	0.269	1.8	0.09	0	0.24	\N	\N	0.14	1985-02-17 00:00:00	崔兴红	510703198502173125
0	171	2	3	2	103311080020	510703197904023125	2	34	2	2	1	1	1	3	-1	-1	1	1	156.0	43.3	66.0	17.7926	127	73	22	12.23	\N	1001	无	\N	3.03	0	12.23	无	无	无	\N	\N	\N	\N	\N	0	1001	\N	\N	3.03	1979-04-02 00:00:00	郭洪英	510703197904023125
0	172	2	3	2	103309250009	510702197305175438	1	40	2	2	2	1	3	3	2	3	1	1	165.0	65.3	82.0	23.9853	138	85	26	2.34	\N	165.17	0.08	\N	0.14	0	2.34	0.304	0.3	0.08	\N	\N	\N	\N	\N	0	165.17	\N	\N	0.14	1973-05-17 00:00:00	谢申林	510702197305175438
0	173	2	3	3	103309240080	51070219670112542X	2	46	2	3	2	1	1	3	1	1	1	1	145.0	51.5	84.0	24.4946	94	56	14	14.36	156.38	130.78	3.7	6.51	6.05	0	14.36	5.835	0.48	3.7	0	156.38	0.317	0.27	6.51	0	130.78	\N	\N	6.05	1967-01-12 00:00:00	毛秀琼	51070219670112542X
0	174	2	3	3	103309240172	510702196604065429	2	47	2	3	2	1	1	3	1	1	1	1	150.0	48.0	71.0	21.3333	110	68	22	15.59	230.27	167.41	0.13	0.09	0.1	0	15.59	1.172	1.92	0.13	0	230.27	0.291	1.71	0.09	0	167.41	\N	\N	0.1	1966-04-06 00:00:00	李本凤	510702196604065429
0	175	2	3	3	103309240173	510702196408155419	1	49	2	3	2	1	2	3	2	3	1	1	167.0	56.7	81.0	20.3306	127	82	104	25.7	45.92	13.98	0.005	8.91	8.7	0.04	25.7	\N	\N	0.005	0	45.92	0.337	0.47	8.91	0	13.98	\N	\N	8.7	1964-08-15 00:00:00	罗曙光	510702196408155419
0	177	2	3	3	103309020064	510702196101235422	2	52	3	3	3	1	1	3	1	1	1	1	155.0	52.9	80.0	22.0187	133	74	169	12.77	691.07	21.83	0.39	0.31	0.15	0	12.77	0.445	1.26	0.39	0	691.07	0.339	1.62	0.31	0	21.83	\N	\N	0.15	1961-01-23 00:00:00	郭秀祝	510702196101235422
0	178	2	3	3	103310040084	51070319850208312X	2	28	1	1	1	1	1	3	1	1	1	1	160.0	73.8	70.0	28.8281	130	82	29	21.1	115.41	1001	0.006	7.89	0.43	0.02	21.1	\N	\N	0.006	0	115.41	0.319	1.33	7.89	0	1001	\N	\N	0.43	1985-02-08 00:00:00	何春梅	51070319850208312X
0	179	2	3	3	103309030060	510702196010285416	1	52	3	3	3	1	1	3	2	2	1	1	162.0	70.2	88.0	26.749	162	90	43	36.98	165.53	101.44	2.06	1.95	1.77	0	36.98	0.385	1.15	2.06	0	165.53	0.294	1.38	1.95	0	101.44	\N	\N	1.77	1960-10-28 00:00:00	何远明	510702196010285416
0	181	2	3	3	103309030011	510702195503045424	2	58	3	3	3	1	1	3	1	1	1	1	148.0	59.5	83.0	27.164	133	66	21	29.79	498.08	6.29	7.89	7.85	4.59	0.01	29.79	0.324	1.41	7.89	0	498.08	0.34	1.55	7.85	0.01	6.29	\N	\N	4.59	1955-03-04 00:00:00	曾玉琼	510702195503045424
0	182	2	3	1	103309030012	522627195707110019	1	56	3	3	3	1	1	3	2	3	1	1	164.0	50.1	75.0	18.6273	117	73	16	82.3	262.19	\N	3.24	3.72	\N	0	82.3	0.411	1.26	3.24	0	262.19	0.327	1.31	3.72	\N	\N	\N	\N	\N	1957-07-11 00:00:00	何远跃	522627195707110019
0	183	2	3	3	103308150039	510702197106265430	1	42	2	2	2	1	1	3	1	2	1	1	169.0	70.0	89.0	24.5089	138	89	39	1.84	1.66	1.22	7.97	9.77	8.44	0.04	1.84	0.465	0.04	7.97	0.03	1.66	0.325	0.02	9.77	0	1.22	\N	\N	8.44	1971-06-26 00:00:00	杨国林	510702197106265430
0	184	2	3	3	103309270132	510703198906033129	2	24	1	1	1	1	1	3	1	1	1	1	152.0	43.5	70.0	18.8279	117	80	13	8.25	430.81	1.63	0.22	0.2	5.48	0.04	8.25	0.646	0.26	0.22	0	430.81	0.295	1.78	0.2	0	1.63	\N	\N	5.48	1989-06-03 00:00:00	周秀	510703198906033129
0	185	2	3	3	103309040127	510702196608265428	2	47	2	3	2	1	1	3	1	1	1	1	167.0	51.8	78.0	18.5736	141	97	24	0	659.7	330.88	0.16	0.95	0.49	0	0	0.293	1.78	0.16	0	659.7	0.364	1.7	0.95	0	330.88	\N	\N	0.49	1966-08-26 00:00:00	洪玉琼	510702196608265428
0	187	2	3	3	103308300073	510702197201205540	2	41	2	2	2	1	1	3	1	1	1	1	150.0	57.7	80.0	25.6444	101	59	16	>1000	17.8	17.25	3.8	6.43	6.42	0	>1000	0.319	1.01	3.8	0	17.8	0.317	1.45	6.43	0	17.25	\N	\N	6.42	1972-01-20 00:00:00	王琼华	510702197201205540
0	188	2	3	3	103309120043	510702197101025411	1	42	2	2	2	1	1	3	1	2	1	1	170.0	66.4	85.0	22.9758	95	55	38	120.62	1001	1001	8.57	8.56	7.82	0	120.62	0.29	1.32	8.57	0	1001	0.304	1.4	8.56	0	1001	\N	\N	7.82	1971-01-02 00:00:00	郭永龙	510702197101025411
0	190	2	3	3	103309280117	510702196304225427	2	50	3	3	3	1	1	3	1	1	1	1	155.0	58.4	80.0	24.308	110	65	13	23.48	46.66	17.57	4.17	3.76	3.01	0	23.48	0.296	1.31	4.17	0	46.66	0.316	1.44	3.76	0	17.57	\N	\N	3.01	1963-04-22 00:00:00	马素琼	510702196304225427
0	191	2	3	3	103309180103	51070219650525542X	2	48	2	3	2	1	1	3	1	1	1	1	155.0	62.5	83.0	26.0146	116	82	22	13.9	108.64	21.17	8.91	9.14	8.67	0	13.9	0.303	1.34	8.91	0	108.64	0.283	1.38	9.14	0	21.17	\N	\N	8.67	1965-05-25 00:00:00	唐蓉	51070219650525542X
0	193	2	3	3	103308260072	510703198102023128	2	32	2	2	1	1	1	3	-1	-1	1	1	150.0	44.4	62.0	19.7333	122	72	11	148.19	1001	17.5	7.7	7.52	4.34	0	148.19	0.291	1.28	7.7	0.01	1001	0.343	1.34	7.52	0	17.5	\N	\N	4.34	1981-02-02 00:00:00	李玉红	510703198102023128
0	194	2	3	3	103309230096	51070219570812541X	1	56	3	3	3	1	2	3	1	1	1	1	155.0	55.2	68.0	22.9761	113	87	23	>1000	78.1	35.58	8.36	9.27	8.51	0	>1000	0.344	1.25	8.36	0	78.1	0.343	0.28	9.27	0	35.58	\N	\N	8.51	1957-08-12 00:00:00	刘代清	51070219570812541X
0	195	2	3	3	103309160070	510702195507065449	2	58	3	3	3	1	1	3	1	1	1	1	150.0	90.6	123.0	40.2667	164	93	19	18.3	10.39	7.77	0.005	9.59	8.49	0.01	18.3	\N	\N	0.005	0	10.39	0.309	0.14	9.59	0	7.77	\N	\N	8.49	1955-07-06 00:00:00	黄秀珍	510702195507065449
0	198	2	3	2	103311190015	510702196312255415	1	49	2	3	2	1	1	3	-1	-1	1	1	168.0	76.2	100.0	26.9983	165	89	22	24.29	\N	37.21	8.94	\N	8.17	0	24.29	0.331	0.78	8.94	\N	\N	\N	\N	\N	0	37.21	\N	\N	8.17	1963-12-25 00:00:00	陈建军	510702196312255415
0	201	2	3	3	103309100079	51070219650905545X	1	48	2	3	2	1	1	3	1	1	1	1	155.0	58.1	79.0	24.1831	115	79	50	19.58	158.45	16.24	9.63	9.99	9.56	0.01	19.58	0.362	1.61	9.63	0	158.45	0.286	1.39	9.99	0	16.24	\N	\N	9.56	1965-09-05 00:00:00	陈光辉	51070219650905545X
0	202	2	3	3	103309270078	510702196808115424	2	45	2	3	2	1	1	3	1	2	1	1	155.0	68.0	90.0	28.3039	121	80	91	13.7	1001	49.33	1.02	0.34	0.78	-2	13.7	\N	\N	1.02	0	1001	0.313	1.86	0.34	0	49.33	\N	\N	0.78	1968-08-11 00:00:00	杨世英	510702196808115424
0	203	2	3	3	103309220017	510702197007275449	2	43	2	2	2	1	1	3	1	1	1	1	160.0	51.1	74.0	19.9609	107	66	19	66.54	302.38	249.48	6.33	6.53	6.84	0	66.54	0.303	1.39	6.33	0	302.38	0.306	1.19	6.53	0	249.48	\N	\N	6.84	1970-07-27 00:00:00	李碧珍	510702197007275449
0	204	2	3	3	103311030055	510702195402065522	2	59	3	3	3	1	1	3	-1	-1	1	1	150.0	59.6	86.0	26.4889	134	80	12	7.8	16.88	19.96	0.005	7.74	6.97	0.01	7.8	\N	\N	0.005	0	16.88	0.312	0.98	7.74	0	19.96	\N	\N	6.97	1954-02-06 00:00:00	张琼芳	510702195402065522
0	205	2	3	3	103309230016	510702196307185440	2	50	3	3	3	1	1	3	1	1	1	1	155.0	52.4	74.0	21.8106	128	72	29	5.7	87.04	85.08	0.005	0.29	9.03	0.01	5.7	\N	\N	0.005	0	87.04	0.307	1.24	0.29	0	85.08	\N	\N	9.03	1963-07-18 00:00:00	周奠凤	510702196307185440
0	207	2	3	3	103309170109	510702197404285421	2	39	2	2	2	1	1	3	1	1	1	1	152.0	47.9	60.0	20.7323	109	61	15	2.73	397.9	16.25	3.26	3.16	9.42	0	2.73	0.334	1.49	3.26	0	397.9	0.303	1.4	3.16	0	16.25	\N	\N	9.42	1974-04-28 00:00:00	谢术琼	510702197404285421
0	208	2	3	3	103308130044	510702196509135425	2	47	2	3	2	1	1	3	1	1	1	1	155.0	54.4	70.0	22.6431	138	95	25	0	28.63	11.52	1.67	0.26	0.28	-2	0	\N	\N	1.67	0	28.63	0.31	1.87	0.26	0	11.52	\N	\N	0.28	1965-09-13 00:00:00	谢秀明	510702196509135425
0	209	2	3	3	103309090038	510702196807266423	2	45	2	3	2	1	1	3	1	1	1	1	160.0	54.4	82.0	21.25	116	75	60	82.81	149.47	426.54	7.02	7.4	0.25	0	82.81	0.334	1.4	7.02	0	149.47	0.315	1.17	7.4	0	426.54	\N	\N	0.25	1968-07-26 00:00:00	马成容	510702196807266423
0	210	2	3	3	103309060037	510703198301013117	1	30	2	2	1	1	1	3	1	1	1	1	163.0	43.9	68.0	16.523	110	69	32	0.06	1001	738.94	0.17	0.11	0.06	0	0.06	0.302	2.08	0.17	0	1001	0.308	1.88	0.11	0	738.94	\N	\N	0.06	1983-01-01 00:00:00	刘刚	510703198301013117
0	211	2	3	3	103310270034	510703199704083122	2	16	1	1	1	1	2	3	1	1	1	1	158.0	53.4	66.0	21.3908	117	73	15	0	134.33	46.15	0.12	0.61	0.05	0	0	0.356	1.66	0.12	0	134.33	0.313	1.6	0.61	0.01	46.15	\N	\N	0.05	1997-04-08 00:00:00	郭晓凤	510703199704083122
0	212	2	3	3	103309280091	510703198103072626	2	32	2	2	1	1	1	3	-1	-1	1	1	161.0	54.3	74.0	20.9483	125	79	26	62.56	196.17	5.09	6.78	6.01	7.19	0	62.56	0.364	1.55	6.78	0	196.17	0.305	1.33	6.01	0	5.09	\N	\N	7.19	1981-03-07 00:00:00	李开春	510703198103072626
0	215	2	3	3	103309280112	510702195502175411	1	58	3	3	3	1	1	3	1	1	1	1	160.0	63.9	87.0	24.9609	148	90	93	0	0.17	0	10.86	10.91	0.19	0	0	0.317	0.05	10.86	2.71	0.17	0.304	0.05	10.91	0	0	\N	\N	0.19	1955-02-17 00:00:00	杨世武	510702195502175411
0	217	2	3	3	103309230133	510623197007111942	2	43	2	2	2	1	1	3	1	1	1	1	150.0	57.9	76.0	25.7333	109	49	19	17.26	114.65	250.05	9.51	10.5	1.54	0	17.26	0.335	1.05	9.51	0	114.65	0.334	1.02	10.5	0	250.05	\N	\N	1.54	1970-07-11 00:00:00	李春香	510623197007111942
0	218	2	3	3	103310050007	510702196602195414	1	47	2	3	2	1	1	3	2	1	1	1	157.0	59.4	80.0	24.0983	127	74	20	19.95	179.13	118.58	1.77	2.12	1.9	0	19.95	0.292	1.7	1.77	0	179.13	0.296	1.57	2.12	0	118.58	\N	\N	1.9	1966-02-19 00:00:00	邓从全	510702196602195414
0	219	2	3	3	103307310056	510702196606145422	2	47	2	3	2	1	3	3	1	1	1	1	158.0	63.8	76.0	25.5568	119	92	29	2.58	49	7.58	5.93	7.64	6.4	0	2.58	0.371	1.17	5.93	0	49	0.311	1.16	7.64	0	7.58	\N	\N	6.4	1966-06-14 00:00:00	李清华	510702196606145422
3	220	2	3	3	103309280164	51070319870713316X	2	26	1	1	1	1	1	3	-1	-1	1	1	155.0	47.4	64.0	19.7294	129	84	21	196.1	111.31	34.61	0.058	3.14	1.99	-2	196.1	\N	\N	0.058	0	111.31	0.338	1.35	3.14	0	34.61	\N	\N	1.99	1987-07-13 00:00:00	赵琼莲	51070319870713316X
0	221	2	3	3	103312220009	510702195506085421	2	58	3	3	3	1	1	3	1	1	1	1	154.0	62.5	80.0	26.3535	169	111	54	6.83	9.88	22.13	0.18	0.2	0.14	0	6.83	0.41	1.64	0.18	0	9.88	0.328	1.49	0.2	0	22.13	\N	\N	0.14	1955-06-08 00:00:00	曾全惠	510702195506085421
0	223	2	3	3	103309260169	510703197902193112	1	34	2	2	1	1	1	3	2	3	1	1	168.0	69.7	91.0	24.6953	128	75	50	15.06	1001	778.55	0.53	0.48	0.49	0	15.06	0.439	1.43	0.53	0	1001	0.286	1.71	0.48	0	778.55	\N	\N	0.49	1979-02-19 00:00:00	谢积刚	510703197902193112
0	224	2	3	3	103308030092	510702195709115416	1	55	3	3	3	1	1	3	1	1	1	1	155.0	56.6	80.0	23.5588	140	81	25	16.7	18.94	26.35	0.005	8.92	8.51	0.03	16.7	\N	\N	0.005	0	18.94	0.305	1.08	8.92	0	26.35	\N	\N	8.51	1957-09-11 00:00:00	赵学敏	510702195709115416
0	225	2	3	3	103312230015	510702196207105415	1	51	3	3	3	1	1	3	2	2	1	1	160.0	61.4	80.0	23.9844	149	80	20	20.9	1001	341.9	2.39	2.44	4.39	0	20.9	0.288	1.11	2.39	0	1001	0.292	1.18	2.44	0	341.9	\N	\N	4.39	1962-07-10 00:00:00	谢家严	510702196207105415
0	229	2	3	3	103311060026	510702196912125438	1	43	2	2	2	1	1	3	2	2	1	1	165.0	72.2	88.0	26.5197	139	92	20	3.7	95.04	76.43	0.009	4.18	3.7	0.03	3.7	\N	\N	0.009	0	95.04	0.327	1.41	4.18	0	76.43	\N	\N	3.7	1969-12-12 00:00:00	粟丰林	510702196912125438
0	230	2	3	3	103309270160	510702195609255438	1	57	3	3	3	1	1	3	-1	-1	2	2	165.0	56.8	72.0	20.8632	161	102	115	0.52	26.74	19.35	4.02	3.4	3.3	0	0.52	0.294	1.4	4.02	0	26.74	0.284	1.36	3.4	0	19.35	\N	\N	3.3	1956-09-25 00:00:00	李玉旭	510702195609255438
0	233	2	3	3	103310300045	510703198311263128	2	29	1	1	1	1	1	3	-1	-1	1	1	160.0	49.8	74.0	19.4531	126	93	13	16.51	470.47	74.89	2.78	0.09	2.61	0	16.51	0.3174	1.64	2.78	0	470.47	0.284	1.47	0.09	0	74.89	\N	\N	2.61	1983-11-26 00:00:00	谢燕	510703198311263128
0	234	2	3	3	103309240005	510702196305165438	1	50	3	3	3	1	1	3	2	3	1	1	155.0	73.6	98.0	30.6348	132	82	7	15.49	33.2	15.18	4.56	0.11	3.69	0	15.49	0.304	1.62	4.56	0	33.2	3.4	1.48	0.11	0	15.18	\N	\N	3.69	1963-05-16 00:00:00	赖成华	510702196305165438
0	238	2	3	3	103309020029	510702196809125421	2	44	2	2	2	1	1	3	1	1	1	1	155.0	61.5	78.0	25.5983	149	94	54	36.17	460.28	258.93	1.38	1.16	5.02	0	36.17	0.293	1.26	1.38	0	460.28	0.301	1.52	1.16	0	258.93	\N	\N	5.02	1968-09-12 00:00:00	胡用兰	510702196809125421
0	240	2	3	1	103310240041	510726197102051823	2	42	2	2	2	2	1	3	1	1	1	1	155.0	59.9	76.0	24.9324	122	72	9	5.35	27.89	\N	6.3	7.76	\N	0.01	5.35	0.299	0.97	6.3	0	27.89	0.327	0.98	7.76	\N	\N	\N	\N	\N	1971-02-05 00:00:00	魏国琼	510726197102051823
0	242	2	3	3	103308300065	510702196501035446	2	48	2	3	2	1	1	3	1	1	1	1	146.0	50.7	72.0	23.785	109	47	12	2.01	56.08	2.55	3.7	2.87	3.19	0	2.01	0.294	0.16	3.7	0	56.08	0.304	0.11	2.87	0	2.55	\N	\N	3.19	1965-01-03 00:00:00	谢秀芳	510702196501035446
0	244	2	3	3	103310090021	510602197204085489	2	41	2	2	2	1	1	3	1	1	1	1	145.0	48.0	76.0	22.83	114	75	164	1.56	1.39	0.08	6.63	9.29	8.63	0	1.56	0.349	0.37	6.63	0	1.39	0.306	0.68	9.29	0	0.08	\N	\N	8.63	1972-04-08 00:00:00	黄秀华	510602197204085489
3	245	2	3	2	103311160011	510626198805214421	2	25	1	1	1	1	1	3	1	1	1	1	162.0	48.3	66.0	18.4042	120	78	24	3.53	\N	37.19	9.67	\N	8.82	0	3.53	0.328	1.19	9.67	\N	\N	\N	\N	\N	0	37.19	\N	\N	8.82	1988-05-21 00:00:00	李维芳	510626198805214421
0	248	2	3	2	103312180009	510703198009023123	2	33	2	2	1	1	1	3	1	1	1	1	162.0	54.0	76.0	20.5761	108	66	15	13.7	\N	894.42	5.83	\N	4.32	0	13.7	0.282	1.67	5.83	\N	\N	\N	\N	\N	0	894.42	\N	\N	4.32	1980-09-02 00:00:00	赵紫红	510703198009023123
0	249	2	3	3	103309020074	510702195710155415	1	55	3	3	3	1	1	3	2	3	1	1	155.0	55.8	84.0	23.2258	132	89	35	0.8	15.07	134.54	0.25	10.11	9.12	0	0.8	0.301	1.34	0.25	0	15.07	0.321	0.05	10.11	0	134.54	\N	\N	9.12	1957-10-15 00:00:00	郭永恩	510702195710155415
0	250	2	3	3	103309020075	510702195711215424	2	55	3	3	3	1	1	3	1	1	2	2	146.0	57.8	83.0	27.1158	165	98	33	73.51	32.86	63.96	9.26	9.16	9.23	0	73.51	0.302	3.01	9.26	0.09	32.86	0.36	0.01	9.16	0	63.96	\N	\N	9.23	1957-11-21 00:00:00	周安会	510702195711215424
0	251	2	3	3	103311060062	510702197205225418	1	41	2	2	2	1	2	3	1	1	1	1	155.0	71.1	89.0	29.5942	136	120	48	1.32	5.17	29.66	8.89	9.16	5.37	0	1.32	0.331	0.15	8.89	0	5.17	0.351	0.12	9.16	0	29.66	\N	\N	5.37	1972-05-22 00:00:00	刘勇	510702197205225418
0	255	2	3	3	103309030084	510702197105055415	1	42	2	2	2	1	1	3	1	1	1	1	170.0	59.8	81.0	20.692	125	66	17	21.81	1001	1001	5.13	2.28	1.08	0	21.81	0.458	1.19	5.13	0	1001	0.324	1.31	2.28	0	1001	\N	\N	1.08	1971-05-05 00:00:00	谢龙	510702197105055415
0	256	2	3	3	103308140055	510602196808144449	2	44	2	2	2	1	1	3	1	1	1	1	160.0	53.3	82.0	20.8203	179	113	62	18.6	49.75	9.29	5.15	4.65	4.84	0	18.6	0.308	1.27	5.15	0	49.75	0.289	1.48	4.65	0	9.29	\N	\N	4.84	1968-08-14 00:00:00	李维秀	510602196808144449
0	258	2	3	3	103312200008	510702196803055426	2	45	2	3	2	1	1	3	1	1	1	1	155.0	66.0	80.0	27.4714	136	84	17	4.84	245.96	89.74	4.87	1.69	4.43	0	4.84	0.329	0.68	4.87	0	245.96	0.351	1.12	1.69	0	89.74	\N	\N	4.43	1968-03-05 00:00:00	米运秀	510702196803055426
0	259	2	3	3	103309020066	510702196307115418	1	50	3	3	3	1	1	3	1	1	1	1	174.0	72.0	84.0	23.7812	105	74	47	12.21	610.44	200.09	0.23	1.9	5.06	0	12.21	0.313	1.62	0.23	0	610.44	0.293	1.47	1.9	0	200.09	\N	\N	5.06	1963-07-11 00:00:00	郭义	510702196307115418
0	260	2	3	3	103310040081	510702195703255426	2	56	3	3	3	1	1	3	1	1	1	1	145.0	60.8	78.0	28.918	150	86	15	7.28	87.57	118.32	1.67	1.83	1.64	0	7.28	0.311	1.52	1.67	0	87.57	0.317	1.47	1.83	0	118.32	\N	\N	1.64	1957-03-25 00:00:00	谢碧琼	510702195703255426
0	261	2	3	2	103311170014	510702197102265417	1	42	2	2	2	1	1	3	-1	-1	1	1	166.0	64.5	76.0	23.4069	159	96	25	0	\N	1001	0.727	\N	0.69	-2	0	\N	\N	0.727	\N	\N	\N	\N	\N	0.02	1001	\N	\N	0.69	1971-02-26 00:00:00	王燕	510702197102265417
0	262	2	3	3	103309270074	510702196207035410	1	51	3	3	3	1	1	3	2	3	1	1	160.0	64.8	90.6	25.3125	171	92	20	2.27	0.63	2.16	8.54	70.78	9.99	0.01	2.27	0.459	0.03	8.54	0.02	0.63	0.31	0.04	70.78	0	2.16	\N	\N	9.99	1962-07-03 00:00:00	赵宗友	510702196207035410
0	263	2	3	3	103311210001	510702196608115462	2	47	2	3	2	2	1	3	1	1	2	2	162.0	81.7	96.0	31.1309	123	63	15	48.3	0.5	85.58	0.23	9.49	0.09	0	48.3	0.537	1.33	0.23	0.54	0.5	0.32	0.01	9.49	0	85.58	\N	\N	0.09	1966-08-11 00:00:00	何秀英	510702196608115462
0	264	2	3	3	103309030007	510702196812105421	2	44	2	2	2	1	1	3	1	1	1	1	156.0	50.0	74.0	20.5457	136	84	27	0	5.38	9.28	0.005	7.65	7.7	0.02	0	\N	\N	0.005	0	5.38	0.313	0.86	7.65	0	9.28	\N	\N	7.7	1968-12-10 00:00:00	谢志英	510702196812105421
0	265	2	3	2	103308130019	510702197112105417	1	41	2	2	2	1	3	3	2	3	1	1	161.0	61.1	80.0	23.5716	123	85	22	4.76	\N	5.31	5.5	\N	7.73	0	4.76	0.806	0.49	5.5	\N	\N	\N	\N	\N	0	5.31	\N	\N	7.73	1971-12-10 00:00:00	谢纯燕	510702197112105417
0	266	2	3	3	103309050046	510702196704145434	1	46	2	3	2	1	1	3	2	2	1	1	165.0	69.1	87.0	25.3811	128	77	26	248.63	648.77	387.56	3.05	4.92	3.54	0	248.63	0.36	1.15	3.05	0	648.77	0.351	0.9	4.92	0.03	387.56	\N	\N	3.54	1967-04-14 00:00:00	谢军	510702196704145434
0	267	2	3	3	103309050045	51062319710423432X	2	42	2	2	2	1	1	3	1	1	1	1	146.0	50.5	76.0	23.6911	114	71	17	13.31	26.29	613.55	2.12	2.71	1.69	0	13.31	0.319	1.49	2.12	0	26.29	0.343	1.22	2.71	0.02	613.55	\N	\N	1.69	1971-04-23 00:00:00	王小华	51062319710423432X
0	268	2	3	3	103309090033	51070219651003543X	1	47	2	3	2	1	1	3	2	2	1	1	168.0	73.8	86.0	26.148	142	94	24	42.34	225	108.92	0.55	0.53	0.39	0	42.34	0.354	1.3	0.55	0	225	0.322	1.44	0.53	0	108.92	\N	\N	0.39	1965-10-03 00:00:00	何勇	51070219651003543X
0	269	2	3	3	103309090034	510702196507175423	2	48	2	3	2	1	1	3	1	1	1	1	155.0	69.6	84.0	28.9698	112	63	87	545.52	556.77	630.22	3.09	0.08	3.21	0	545.52	0.328	1.19	3.09	0	556.77	0.334	1.41	0.08	0	630.22	\N	\N	3.21	1965-07-17 00:00:00	谢琼茹	510702196507175423
0	271	2	3	2	103309180031	51072719730815084X	2	40	2	2	2	1	1	3	1	1	1	1	152.0	55.3	76.0	23.9352	109	71	32	23.94	\N	49.52	4.69	\N	4.72	0.01	23.94	0.372	0.72	4.69	\N	\N	\N	\N	\N	0	49.52	\N	\N	4.72	1973-08-15 00:00:00	鲜玉	51072719730815084X
0	272	2	3	3	103309040120	510702196605295429	2	47	2	3	2	1	1	3	1	1	2	2	158.0	61.6	80.0	24.6755	167	102	32	0	19.27	1001	1.67	0.17	0.13	0.02	0	\N	\N	1.67	0	19.27	0.34	1.59	0.17	0	1001	\N	\N	0.13	1966-05-29 00:00:00	谢龙英	510702196605295429
0	273	2	3	3	103311020037	510702196411105543	2	48	2	3	2	1	1	3	1	1	1	1	150.0	85.0	100.0	37.7778	175	101	30	2.48	7.81	1.71	6.45	8.02	7.99	0	2.48	0.487	0.17	6.45	0	7.81	0.316	1.06	8.02	0	1.71	\N	\N	7.99	1964-11-10 00:00:00	刘秀琼	510702196411105543
0	274	2	3	3	103311010025	510702196512165510	1	47	2	3	2	1	1	3	-1	-1	1	1	155.0	62.5	84.0	26.0146	132	82	19	18.92	913.06	313.69	6.93	6.68	6.55	0	18.92	0.312	0.13	6.93	0	913.06	0.287	0.12	6.68	0	313.69	\N	\N	6.55	1965-12-16 00:00:00	王用卫	510702196512165510
0	275	2	3	3	103312250002	51070219690301543X	1	44	2	2	2	1	1	3	2	3	1	1	160.0	49.9	74.0	19.4922	119	78	15	28.16	408.99	84	1.38	1.79	1.74	0	28.16	0.519	0.63	1.38	0	408.99	0.32	1.51	1.79	0	84	\N	\N	1.74	1969-03-01 00:00:00	邓益全	51070219690301543X
0	276	2	3	3	103309030074	510702195410275423	2	58	3	3	3	1	1	3	1	1	1	1	150.0	50.0	81.0	22.2222	153	91	25	2.84	176.72	34.41	3.5	4.14	2.1	0	2.84	0.366	1.07	3.5	0.03	176.72	0.343	0.89	4.14	0	34.41	\N	\N	2.1	1954-10-27 00:00:00	曾桂琼	510702195410275423
0	278	2	3	3	103308190010	510702195611095429	2	56	3	3	3	1	1	3	1	1	1	1	145.0	63.1	93.0	30.0119	146	85	20	0	1.66	1.93	0.13	0.16	0.12	0	0	0.301	1.29	0.13	0	1.66	0.321	1.49	0.16	0	1.93	\N	\N	0.12	1956-11-09 00:00:00	程世兰	510702195611095429
0	279	2	3	3	103308100009	510702196310055436	1	49	2	3	2	1	1	3	2	3	1	1	153.0	69.9	93.0	29.8603	132	81	43	0	5.56	1001	0.12	0.18	6.45	0	0	0.283	1.76	0.12	0	5.56	0.344	1.71	0.18	0	1001	\N	\N	6.45	1963-10-05 00:00:00	谢文国	510702196310055436
0	280	2	3	2	103310220055	510721197311064389	2	39	2	2	2	1	1	3	1	1	1	1	152.0	53.2	78.0	23.0263	112	70	90	0	\N	0.3	1.7	\N	0.28	-2	0	\N	\N	1.7	\N	\N	\N	\N	\N	0	0.3	\N	\N	0.28	1973-11-06 00:00:00	唐志会	510721197311064389
0	281	2	3	3	103309260097	510702195503155412	1	58	3	3	3	1	1	3	2	1	1	1	154.0	52.8	77.0	22.2635	127	80	28	158.6	346.28	51.71	0.005	6.76	5.65	0.01	158.6	\N	\N	0.005	0	346.28	0.356	1.04	6.76	0	51.71	\N	\N	5.65	1955-03-15 00:00:00	赵宗义	510702195503155412
0	282	2	3	2	103309060076	510702195712305421	2	55	3	3	3	1	1	3	1	1	1	1	142.0	45.0	76.0	22.317	161	76	35	4.75	\N	16.99	9.37	\N	9.24	0.01	4.75	0.345	1.03	9.37	\N	\N	\N	\N	\N	0	16.99	\N	\N	9.24	1957-12-30 00:00:00	李素琼	510702195712305421
0	283	2	3	2	103309240178	510703198603163137	1	27	1	1	1	1	1	3	2	1	1	1	166.0	100.3	105.0	36.3986	143	86	73	4.67	\N	25.9	5.15	\N	4.54	0	4.67	0.368	0.29	5.15	\N	\N	\N	\N	\N	0	25.9	\N	\N	4.54	1986-03-16 00:00:00	李刚	510703198603163137
0	284	2	3	3	103309100044	510702196304115447	2	50	3	3	3	1	1	3	1	1	1	1	155.0	58.2	84.0	24.2248	115	80	81	1.41	28.88	137.64	8.07	9.45	8.44	0	1.41	0.347	0.16	8.07	0	28.88	0.303	0.17	9.45	0	137.64	\N	\N	8.44	1963-04-11 00:00:00	唐福会	510702196304115447
0	285	2	3	2	103308200045	51072619750418264X	2	38	2	2	2	2	1	3	1	1	1	1	156.0	59.5	72.0	24.4494	108	43	11	0	\N	6.31	1.87	\N	0.08	-2	0	\N	\N	1.87	\N	\N	\N	\N	\N	0	6.31	\N	\N	0.08	1975-04-18 00:00:00	冯志秀	51072619750418264X
0	286	2	3	3	103308230050	510702197309265027	2	39	2	2	2	1	1	3	1	1	1	1	152.0	42.8	62.0	18.5249	136	92	13	0.13	40.78	166.32	7.33	7.47	0.51	0	0.13	0.31	1.39	7.33	0	40.78	0.298	1.38	7.47	0.01	166.32	\N	\N	0.51	1973-09-26 00:00:00	徐明英	510702197309265027
0	287	2	3	3	103309200129	510703199807213110	1	15	1	1	1	1	1	3	-1	-1	1	1	165.0	50.4	64.0	18.5124	100	55	9	6.021	587.84	35.9	0.36	0.09	7.55	0	6.021	0.297	1.89	0.36	0	587.84	0.307	1.8	0.09	0	35.9	\N	\N	7.55	1998-07-21 00:00:00	李沁	510703199807213110
0	288	2	3	3	103308020036	51060219641115514X	2	48	2	3	2	1	1	3	-1	-1	1	1	153.0	50.2	66.5	21.4447	110	70	39	0	122.44	676.08	1.8	0.29	0.16	-2	0	\N	\N	1.8	0.05	122.44	0.369	1.49	0.29	0	676.08	\N	\N	0.16	1964-11-15 00:00:00	杨述琼	51060219641115514X
0	289	2	3	2	103309100056	510702197511255025	2	37	2	2	2	1	1	3	1	1	1	1	151.0	54.5	76.0	23.9025	95	62	18	1.68	\N	5.29	0.11	\N	0.1	0.02	1.68	0.354	1.63	0.11	\N	\N	\N	\N	\N	0	5.29	\N	\N	0.1	1975-11-25 00:00:00	王东兰	510702197511255025
0	290	2	3	3	103309030059	510726197708160223	2	36	2	2	2	1	1	3	-1	-1	1	1	158.0	48.4	70.0	19.3879	92	64	40	8.4	388.2	135.46	0.571	0.94	0.5	0.01	8.4	\N	\N	0.571	0.04	388.2	0.429	1.39	0.94	0	135.46	\N	\N	0.5	1977-08-16 00:00:00	王霞	510726197708160223
0	291	2	3	3	103309160109	510702196102045428	2	52	3	3	3	1	1	3	1	1	1	1	158.0	62.0	85.0	24.8358	140	91	159	7.2	205.29	16.25	0.005	1.16	9.42	0.01	7.2	\N	\N	0.005	0	205.29	0.492	0.16	1.16	0	16.25	\N	\N	9.42	1961-02-04 00:00:00	唐定春	510702196102045428
0	292	2	3	3	103309260069	51070219660524543X	1	47	2	3	2	1	1	3	2	2	1	1	160.0	65.1	81.0	25.4297	131	79	45	11.05	372.15	15.89	5.23	6.31	9.94	0.01	11.05	0.46	0.53	5.23	0	372.15	0.34	0.59	6.31	0	15.89	\N	\N	9.94	1966-05-24 00:00:00	赵学古	51070219660524543X
0	293	2	3	3	103308210047	510702196604276429	2	47	2	3	2	1	1	3	1	3	1	1	152.0	54.3	74.0	23.5024	103	61	34	140.7	1001	305.46	2.94	2.6	2.76	0	140.7	0.289	1.04	2.94	0	1001	0.308	1.1	2.6	0	305.46	\N	\N	2.76	1966-04-27 00:00:00	陈必芳	510702196604276429
0	294	2	3	3	103309230128	510626199002287402	2	23	1	1	1	1	1	3	-1	-1	1	1	152.0	54.2	78.0	23.4591	108	69	17	0	13.81	0.68	1.92	0.14	0.11	-2	0	\N	\N	1.92	0	13.81	0.325	1.79	0.14	0	0.68	\N	\N	0.11	1990-02-28 00:00:00	朱春梅	510626199002287402
0	296	2	3	3	103310150021	510702196309185428	2	50	3	3	3	1	1	3	-1	-1	1	1	150.0	52.3	76.0	23.2444	131	58	58	16.1	1001	91.37	1.68	0.15	0.11	0.01	16.1	\N	\N	1.68	0	1001	0.314	1.58	0.15	0	91.37	\N	\N	0.11	1963-09-18 00:00:00	孙红宇	510702196309185428
0	297	2	3	3	103309110053	510702195708155416	1	56	3	3	3	1	1	3	1	1	1	1	165.0	63.4	77.0	23.2874	124	77	36	3.3	236.48	7.92	7.83	8.03	7.32	0	3.3	0.313	0.35	7.83	0	236.48	0.298	0.14	8.03	0	7.92	\N	\N	7.32	1957-08-15 00:00:00	任万发	510702195708155416
0	299	2	3	3	103310040022	510703199506153126	2	18	1	1	1	1	2	3	1	1	1	1	150.0	40.3	60.0	17.9111	108	71	22	2.87	578.7	29.91	0.13	0.12	0.21	0	2.87	0.318	2.03	0.13	0	578.7	0.296	1.86	0.12	0	29.91	\N	\N	0.21	1995-06-15 00:00:00	邓玲	510703199506153126
0	301	2	3	3	103310180080	51060219640801512X	2	49	2	3	2	1	1	3	-1	-1	1	1	156.0	62.2	76.0	25.5588	112	68	16	97	1001	364.12	0.005	8.1	7.58	-2	97	\N	\N	0.005	0	1001	0.336	0.76	8.1	0	364.12	\N	\N	7.58	1964-08-01 00:00:00	邓德凤	51060219640801512X
0	302	2	3	3	103310060064	510702196207225441	2	51	3	3	3	1	1	3	-1	-1	1	1	158.0	56.5	76.0	22.6326	149	88	29	9.33	182.36	78.34	8.13	7.12	5.94	0	9.33	0.31	1.17	8.13	0	182.36	0.337	1.41	7.12	0.01	78.34	\N	\N	5.94	1962-07-22 00:00:00	林桂琼	510702196207225441
0	303	2	3	3	103310060063	510602195706025110	1	56	3	3	3	1	1	3	-1	-1	1	1	155.0	60.2	86.0	25.0572	141	83	34	47.89	33.84	46.95	0.91	0.91	0.81	0	47.89	0.308	1.82	0.91	0	33.84	0.284	1.76	0.91	0	46.95	\N	\N	0.81	1957-06-02 00:00:00	何奉生	510602195706025110
0	309	2	3	3	103308300023	510702195503165426	2	58	3	3	3	1	1	3	1	1	1	1	152.0	63.4	84.0	27.4411	146	76	21	3.7	511.39	27.41	0.005	9.49	8.95	0.04	3.7	\N	\N	0.005	0	511.39	0.324	0.42	9.49	0	27.41	\N	\N	8.95	1955-03-16 00:00:00	刘世斌	510702195503165426
0	310	2	3	3	103309020067	510703198609273118	1	26	1	1	1	1	2	3	-1	-1	1	1	176.0	87.1	90.0	28.1185	129	93	61	63.1	31.7	25.54	0.005	6.85	9.09	-2	63.1	\N	\N	0.005	0.06	31.7	0.586	0.61	6.85	0	25.54	\N	\N	9.09	1986-09-27 00:00:00	郭永虎	510703198609273118
0	311	2	3	3	103309030013	510823198406177063	2	29	1	1	1	1	1	3	-1	-1	1	1	155.0	47.0	66.0	19.563	101	62	23	51.5	601.62	134.72	0.004	0.05	7.91	-2	51.5	\N	\N	0.004	0	601.62	0.331	1.84	0.05	0	134.72	\N	\N	7.91	1984-06-17 00:00:00	杨雪蓉	510823198406177063
0	312	2	3	3	103310070007	510702196301185415	1	50	3	3	3	1	3	3	1	2	1	1	156.0	62.3	90.0	25.5999	114	73	20	26.9	85.5	29.57	0.005	6.73	5.21	-2	26.9	\N	\N	0.005	0	85.5	0.398	1.37	6.73	0	29.57	\N	\N	5.21	1963-01-18 00:00:00	周永远	510702196301185415
0	313	2	3	3	103309260012	510702196311065425	2	49	2	3	2	1	1	3	1	1	1	1	153.0	56.5	74.0	24.136	127	68	35	26	48.21	46.3	0.083	2.83	2.42	-2	26	\N	\N	0.083	0	48.21	0.372	1.6	2.83	0	46.3	\N	\N	2.42	1963-11-06 00:00:00	李琼芳	510702196311065425
0	314	2	3	3	103311040057	510702196603215544	2	47	2	3	2	1	1	3	-1	-1	1	1	155.0	61.4	78.0	25.5567	134	82	15	6.1	64.65	5	0.007	6.82	5.59	0.01	6.1	\N	\N	0.007	0	64.65	0.284	1.3	6.82	0	5	\N	\N	5.59	1966-03-21 00:00:00	孙德凤	510702196603215544
0	315	2	3	3	103308230030	51070219610415541X	1	52	3	3	3	1	1	3	1	1	2	2	164.0	67.9	92.0	25.2454	144	77	66	13.2	70.62	17.01	0.005	7.66	7.08	0.01	13.2	\N	\N	0.005	0.29	70.62	0.305	0.32	7.66	0	17.01	\N	\N	7.08	1961-04-15 00:00:00	孙德育	51070219610415541X
0	316	2	3	3	103308230031	510702196406045427	2	49	2	3	2	1	1	3	1	1	1	1	156.0	64.0	78.0	26.2985	156	116	17	0	1001	1001	0.005	6.16	5.96	0.01	0	\N	\N	0.005	0	1001	0.312	0.03	6.16	0	1001	\N	\N	5.96	1964-06-04 00:00:00	陈显述	510702196406045427
0	317	2	3	3	103310180025	510702197010065020	2	43	2	2	2	1	1	3	1	1	1	1	150.0	54.3	82.0	24.1333	116	79	20	146.9	83.78	502.46	0.005	1.51	5.82	0.01	146.9	\N	\N	0.005	0.8	83.78	2.384	0.01	1.51	0	502.46	\N	\N	5.82	1970-10-06 00:00:00	王银芳	510702197010065020
0	319	2	3	3	103310090020	510922199108235206	2	22	1	1	1	1	1	3	-1	-1	1	1	155.0	64.2	80.0	26.7222	136	79	22	85.6	375.42	43.04	0.005	0.17	0.1	0.02	85.6	\N	\N	0.005	0	375.42	0.3	1.77	0.17	0	43.04	\N	\N	0.1	1991-08-23 00:00:00	王彩霞	510922199108235206
0	320	2	3	3	103308260011	510702195811025433	1	54	3	3	3	1	1	3	1	1	1	1	160.0	45.0	70.0	17.5781	143	92	110	2.4	30.46	4.92	0.005	8.71	8.06	0.03	2.4	\N	\N	0.005	0	30.46	0.282	0.04	8.71	0	4.92	\N	\N	8.06	1958-11-02 00:00:00	马成文	510702195811025433
0	321	2	3	3	103308120032	51060219731009512X	2	39	2	2	2	1	1	3	1	1	1	1	146.0	44.9	65.0	21.064	114	61	11	0	10.53	18.1	1.73	0.14	4.78	-2	0	\N	\N	1.73	0	10.53	0.326	1.57	0.14	0	18.1	\N	\N	4.78	1973-10-09 00:00:00	米晓娟	51060219731009512X
0	323	2	3	3	103309290076	510602197002275284	2	43	2	2	2	1	1	3	1	1	1	1	155.0	68.8	92.0	28.6368	134	85	80	39.5	17.65	21.73	0.005	8.21	7.3	-2	39.5	\N	\N	0.005	0	17.65	0.288	0.15	8.21	0	21.73	\N	\N	7.3	1970-02-27 00:00:00	蒋彩英	510602197002275284
0	324	2	3	3	103309060051	510702195610075426	2	56	3	3	3	1	1	3	1	1	1	1	145.0	46.3	76.0	22.0214	108	64	40	0	161.01	23.79	0.11	8.63	7.68	0	0	0.327	1.8	0.11	0	161.01	0.323	0.83	8.63	0	23.79	\N	\N	7.68	1956-10-07 00:00:00	郭清莲	510702195610075426
0	325	2	3	3	103309130036	51070219650912542X	2	48	2	3	2	1	1	3	1	1	1	1	145.0	44.1	70.0	20.975	111	58	16	8.88	362.84	146.65	7.5	0.39	0.36	0	8.88	0.292	1.51	7.5	0	362.84	0.349	1.66	0.39	0	146.65	\N	\N	0.36	1965-09-12 00:00:00	肖哓蓉	51070219650912542X
0	326	2	3	3	103308060053	510703198710283118	1	25	1	1	1	1	2	3	2	3	1	1	174.0	87.0	95.0	28.7356	172	90	134	0.05	370.46	150.08	9.56	0.07	7.29	0	0.05	0.292	0.01	9.56	0	370.46	0.319	1.79	0.07	0.19	150.08	\N	\N	7.29	1987-10-28 00:00:00	周强	510703198710283118
0	327	2	3	3	103310040144	510702197803235421	2	35	2	2	2	1	1	3	-1	-1	1	1	156.0	52.7	70.0	21.6552	103	67	18	21.19	72.62	7.87	8.98	9.02	8.03	0	21.19	0.297	0.17	8.98	0	72.62	0.289	0.49	9.02	0	7.87	\N	\N	8.03	1978-03-23 00:00:00	谢晓莉	510702197803235421
0	328	2	3	3	103308270024	510702195708285421	2	55	3	3	3	1	1	3	1	1	1	1	148.0	47.5	70.0	21.6855	119	64	26	7.62	51.12	4.05	4.16	9.25	7.8	0	7.62	0.33	1.28	4.16	0	51.12	0.304	1.03	9.25	0	4.05	\N	\N	7.8	1957-08-28 00:00:00	赵礼蓉	510702195708285421
0	330	2	3	3	103309200079	510702196407065411	1	49	2	3	2	1	1	3	1	2	2	2	160.0	64.3	82.0	25.1172	166	110	69	1.57	1001	276.59	0.11	0.1	0.11	0	1.57	0.413	1.71	0.11	0	1001	0.301	1.76	0.1	0	276.59	\N	\N	0.11	1964-07-06 00:00:00	谢家康	510702196407065411
0	331	2	3	3	103308220035	510702195406295421	2	59	3	3	3	1	1	3	1	2	1	1	146.0	48.9	73.0	22.9405	132	86	73	42.9	339.17	129.64	0.2	0.07	0.16	0	42.9	0.355	1.67	0.2	0	339.17	0.32	1.87	0.07	0	129.64	\N	\N	0.16	1954-06-29 00:00:00	王聪	510702195406295421
0	332	2	3	3	103310040184	510702196011205529	2	52	3	3	3	1	1	3	-1	-1	1	1	148.0	52.6	76.0	24.0139	118	67	19	14.51	223.84	175.16	0.95	0.82	6.52	0	14.51	0.307	1.29	0.95	0	223.84	0.302	1.64	0.82	0	175.16	\N	\N	6.52	1960-11-20 00:00:00	杨琼英	510702196011205529
0	333	2	3	3	103310050057	510702195409145445	2	59	3	3	3	1	1	3	1	3	1	1	150.0	44.9	86.0	19.9556	116	77	20	28.42	8.25	1001	1.24	7.1	7.64	0.02	28.42	0.366	1.47	1.24	0	8.25	0.326	1.46	7.1	0.03	1001	\N	\N	7.64	1954-09-14 00:00:00	田兴琼	510702195409145445
0	335	2	3	3	103308300042	510702197001065416	1	43	2	2	2	1	1	3	2	2	2	2	164.0	51.7	66.0	19.2222	140	100	30	20.61	1001	108.85	1.12	1	0.11	0	20.61	0.303	1.66	1.12	0	1001	0.297	1.6	1	0	108.85	\N	\N	0.11	1970-01-06 00:00:00	谢忠华	510702197001065416
0	337	2	3	3	103309130052	510703199104093116	1	22	1	1	1	1	1	3	-1	-1	1	1	182.0	57.0	68.0	17.2081	114	74	29	0.5	1001	1001	9.42	7.76	7.62	0	0.5	0.326	0.85	9.42	0	1001	0.298	0.02	7.76	0.04	1001	\N	\N	7.62	1991-04-09 00:00:00	李超	510703199104093116
0	338	2	3	3	103309130051	51070219660615541X	1	47	2	3	2	1	1	3	2	2	1	1	165.0	58.6	80.0	21.5243	106	69	29	0	1001	945.62	0.005	5.23	4.92	0.02	0	\N	\N	0.005	0	1001	0.339	1.1	5.23	0	945.62	\N	\N	4.92	1966-06-15 00:00:00	李念华	51070219660615541X
0	339	2	3	3	103308120046	510702196812275447	2	44	2	2	2	1	1	3	1	1	1	1	152.0	52.2	68.0	22.5935	116	71	60	0	529.74	65.32	0.12	1.15	1.32	0	0	0.32	1.68	0.12	0	529.74	0.313	1.78	1.15	0	65.32	\N	\N	1.32	1968-12-27 00:00:00	郑素蓉	510702196812275447
0	340	2	3	3	103309230053	510821196805056320	2	45	2	3	2	1	1	3	1	1	1	1	155.0	61.4	80.0	25.5567	118	74	20	7.71	122.04	37.02	8.76	0.01	0.1	0	7.71	0.313	0.8	8.76	0	122.04	0.391	1.98	0.01	0	37.02	\N	\N	0.1	1968-05-05 00:00:00	杨荣华	510821196805056320
0	341	2	3	3	103308260071	510702197802175447	2	35	2	2	2	1	1	3	1	1	1	1	150.0	46.5	67.0	20.6667	115	76	15	63.68	89.26	47.54	8.41	7.95	5.21	0	63.68	0.292	1.36	8.41	0	89.26	0.319	1.38	7.95	0.02	47.54	\N	\N	5.21	1978-02-17 00:00:00	李红梅	510702197802175447
0	342	2	3	3	103309100046	510702197302175029	2	40	2	2	2	1	1	3	1	1	1	1	163.0	50.5	61.0	19.0071	107	69	13	1.58	187	224.02	0.11	5.16	3.59	0	1.58	0.307	1.85	0.11	0	187	0.343	1.27	5.16	0	224.02	\N	\N	3.59	1973-02-17 00:00:00	王小蓉	510702197302175029
0	343	2	3	3	103309260192	510702197002195415	1	43	2	2	2	1	1	3	2	2	1	1	176.0	78.6	92.0	25.3745	115	74	82	>1000	19.62	20.83	8.59	10.08	9.66	0	>1000	0.29	0.01	8.59	0	19.62	0.334	0.22	10.08	0	20.83	\N	\N	9.66	1970-02-19 00:00:00	李建	510702197002195415
0	344	2	3	3	103309180090	510703199408193124	2	19	1	1	1	1	2	3	1	1	1	1	165.0	45.5	65.0	16.7126	84	59	15	30.2	465.58	56.51	0.48	0.12	0.09	0	30.2	0.283	1.63	0.48	0	465.58	0.284	1.86	0.12	0	56.51	\N	\N	0.09	1994-08-19 00:00:00	崔云	510703199408193124
0	347	2	3	3	103308290105	510702197106105429	2	42	2	2	2	1	1	3	1	1	1	1	124.0	38.3	73.0	24.9089	108	70	26	0.08	7.6	176.78	0.13	0.12	0.08	0	0.08	0.298	1.85	0.13	0	7.6	0.304	1.88	0.12	0	176.78	\N	\N	0.08	1971-06-10 00:00:00	向万秀	510702197106105429
0	348	2	3	3	103309100004	510702196901035410	1	44	2	2	2	1	1	3	1	2	1	1	166.1	81.9	102.0	29.6855	137	79	15	7.18	379.47	54.34	1.1	0.89	0.73	0	7.18	0.295	0.97	1.1	0	379.47	0.336	0.97	0.89	0	54.34	\N	\N	0.73	1969-01-03 00:00:00	王安武	510702196901035410
0	349	2	3	3	103310090038	510703199407083126	2	19	1	1	1	1	2	3	1	1	1	1	165.0	49.0	68.0	17.9982	120	80	18	0	40.34	5.85	0.21	0.12	0.1	0	0	0.322	1.63	0.21	0	40.34	0.308	1.55	0.12	0	5.85	\N	\N	0.1	1994-07-08 00:00:00	王晓凤	510703199407083126
0	350	2	3	3	103310300016	510702196502265518	1	48	2	3	2	1	1	3	-1	-1	1	1	147.0	69.9	94.0	32.3476	134	90	104	7.82	1001	27.64	7.74	7.19	6.42	0	7.82	0.303	1.36	7.74	0	1001	0.308	1.55	7.19	0	27.64	\N	\N	6.42	1965-02-26 00:00:00	林子才	510702196502265518
0	351	2	3	3	103308070019	510702196207145417	1	51	3	3	3	1	1	3	3	1	1	1	167.0	57.6	73.0	20.6533	121	73	41	0	9.81	6.69	0.22	0.11	0.1	0	0	0.349	1.64	0.22	0	9.81	0.335	1.69	0.11	0	6.69	\N	\N	0.1	1962-07-14 00:00:00	阳清华	510702196207145417
0	353	2	3	3	103309050015	510702195606155423	2	57	3	3	3	1	1	3	1	1	2	2	155.0	66.3	87.0	27.5963	146	86	44	160.89	1001	226.4	9.11	9.51	8.97	0	160.89	0.29	1.3	9.11	0	1001	0.305	1.38	9.51	0	226.4	\N	\N	8.97	1956-06-15 00:00:00	杨玉琼	510702195606155423
0	355	2	3	3	103310070011	510702196503255418	1	48	2	3	2	1	1	3	2	3	1	1	162.0	65.1	88.0	24.8057	127	82	18	3.81	5.81	5.29	7.41	7.81	6.27	0	3.81	0.318	0.55	7.41	0.01	5.81	0.313	0.61	7.81	0	5.29	\N	\N	6.27	1965-03-25 00:00:00	向能甫	510702196503255418
0	356	2	3	3	103309290061	510703199001273122	2	23	1	1	1	1	2	3	-1	-1	1	1	168.0	58.2	72.0	20.6207	124	85	61	0	11.24	0.62	0.34	0.1	6.1	0	0	0.304	1.77	0.34	0	11.24	0.337	1.74	0.1	0.02	0.62	\N	\N	6.1	1990-01-27 00:00:00	邓木兰	510703199001273122
0	357	2	3	3	103311080058	510702195403215529	2	59	3	3	3	1	1	3	-1	-1	2	2	145.0	47.6	70.0	22.6397	167	88	11	85.77	1001	105.12	2.66	3.27	5.91	0	85.77	0.337	1.58	2.66	0	1001	0.323	1.2	3.27	0	105.12	\N	\N	5.91	1954-03-21 00:00:00	贾述兰	510702195403215529
0	358	2	3	3	103309130012	510702196109195429	2	51	3	3	3	1	1	3	1	1	1	1	150.0	64.6	95.0	28.7111	142	101	109	204.38	1001	2.82	0.91	0.96	0.99	0	204.38	0.317	0.84	0.91	0	1001	0.294	0.91	0.96	0	2.82	\N	\N	0.99	1961-09-19 00:00:00	蓝玉芳	510702196109195429
0	359	2	3	3	103309270012	510702197610095047	2	36	2	2	2	1	1	3	1	1	1	1	165	67.5	78.0	24.7934	136	90	24	51.3	294.58	227.76	8.35	8.81	7.56	0	51.3	0.319	1.38	8.35	0	294.58	0.351	1.17	8.81	0	227.76	\N	\N	7.56	1976-10-09 00:00:00	李明琼	510702197610095047
0	360	2	3	3	103309280002	510702197110275412	1	41	2	2	2	1	1	3	2	3	1	1	170.0	61.0	79.0	21.1073	143	87	121	281.47	881.18	525.3	9.07	8.86	8.38	0	281.47	0.294	0.25	9.07	0	881.18	0.298	0.3	8.86	0	525.3	\N	\N	8.38	1971-10-27 00:00:00	赵宗泽	510702197110275412
0	361	2	3	3	103309280001	510702197303195427	2	40	2	2	2	1	1	3	1	1	2	2	145.0	62.8	90.0	29.8692	195	124	18	0	1001	7.28	0.14	0.19	0.09	0	0	0.301	1.89	0.14	0	1001	0.316	1.75	0.19	0	7.28	\N	\N	0.09	1973-03-19 00:00:00	杨桂梅	510702197303195427
0	362	2	3	3	103309280032	510702195505255468	2	58	3	3	3	1	1	3	1	1	1	1	155.0	50.6	83.0	21.0614	143	76	181	720.73	1001	831.09	5	4.87	4.87	0	720.73	0.404	1.59	5	0	1001	0.295	1.57	4.87	0	831.09	\N	\N	4.87	1955-05-25 00:00:00	赖述琼	510702195505255468
0	364	2	3	3	103309280111	510702197302105418	1	40	2	2	2	1	1	3	2	3	1	1	163.0	56.2	74.0	21.1525	78	63	23	197.86	1001	647.64	8.46	8.8	8.2	0	197.86	9.604	0.73	8.46	0	1001	0.311	0.01	8.8	0	647.64	\N	\N	8.2	1973-02-10 00:00:00	杨其刚	510702197302105418
2	365	2	3	3	103310090015	532126199909020325	2	14	0	0	0	1	3	3	1	1	1	1	145.0	33.6	60.0	15.981	118	70	13	0.47	305.12	21.85	0.11	0.17	0.15	0	0.47	0.337	1.3	0.11	0	305.12	0.316	1.42	0.17	0	21.85	\N	\N	0.15	1999-09-02 00:00:00	李安春	532126199909020325
0	366	2	3	3	103309260117	510702196602205424	2	47	2	3	2	1	1	3	1	1	1	1	161.0	82.1	98.0	31.6732	136	82	40	2.05	14.45	3.18	7.7	9.95	8.85	0	2.05	0.466	0.84	7.7	0	14.45	0.301	0.61	9.95	0	3.18	\N	\N	8.85	1966-02-20 00:00:00	米琼茹	510702196602205424
0	367	2	3	3	103309170124	510702195505185439	1	58	3	3	3	1	1	3	2	3	1	1	155.0	58.7	88.0	24.4329	127	66	65	0.58	13.15	2.97	4.21	3.94	3.3	0	0.58	0.319	1.28	4.21	0	13.15	0.329	1.44	3.94	0	2.97	\N	\N	3.3	1955-05-18 00:00:00	李科泉	510702195505185439
0	369	2	3	3	103309220040	510602197210124448	2	40	2	2	2	1	1	3	1	1	1	1	155.0	47.0	64.0	19.563	116	73	23	1.01	323.98	105.84	0.11	0.22	0.11	0	1.01	0.351	1.89	0.11	0	323.98	0.302	1.86	0.22	0	105.84	\N	\N	0.11	1972-10-12 00:00:00	米述平	510602197210124448
0	370	2	3	3	103310040197	510702197510225449	2	37	2	2	2	1	1	3	-1	-1	1	1	155.0	46.9	84.0	19.5213	108	70	15	2.65	114.99	103.02	8.56	8.06	8.47	0	2.65	0.318	0.33	8.56	0	114.99	0.305	0.41	8.06	0	103.02	\N	\N	8.47	1975-10-22 00:00:00	谢晓燕	510702197510225449
0	371	2	3	3	103310040065	510702195501105411	1	58	3	3	3	1	1	3	1	2	1	1	165.0	67.8	86.0	24.9036	144	95	46	20.54	449.27	65.1	1.2	1.89	1.1	0	20.54	0.332	1.62	1.2	0	449.27	0.298	1.24	1.89	0	65.1	\N	\N	1.1	1955-01-10 00:00:00	赵春昌	510702195501105411
0	373	2	3	3	103308140053	51070319851215311X	1	27	1	1	1	1	3	3	2	1	1	1	175.0	54.0	64.0	17.6327	97	57	32	0.12	15.97	354.41	0.08	0.6	0.06	0	0.12	0.366	2.01	0.08	0	15.97	0.331	1.92	0.6	0	354.41	\N	\N	0.06	1985-12-15 00:00:00	阳小虎	51070319851215311X
3	374	2	3	3	103308080058	510703198903213124	2	24	1	1	1	1	1	3	1	1	1	1	152.1	53.0	70.1	22.9096	98	71	18	149.39	1001	470.84	0.13	0.15	0.21	0	149.39	0.314	1.84	0.13	0	1001	0.319	1.76	0.15	0	470.84	\N	\N	0.21	1989-03-21 00:00:00	谢虹虹	510703198903213124
0	375	2	3	3	103310040044	510702197711295419	1	35	2	2	2	1	1	3	-1	-1	1	1	171.0	59.5	79.0	20.3481	108	71	27	28.27	1001	330.75	6.06	6.08	5.66	0	28.27	0.318	1.01	6.06	0	1001	0.316	0.89	6.08	0	330.75	\N	\N	5.66	1977-11-29 00:00:00	赵智勇	510702197711295419
0	376	2	3	3	103310040048	510781197710206002	2	35	2	2	2	1	1	3	-1	-1	1	1	165.0	57.9	76.0	21.2672	116	81	19	79.05	1001	450.93	3.69	4.37	3.26	0	79.05	0.524	0.03	3.69	0	1001	0.315	1.78	4.37	0.01	450.93	\N	\N	3.26	1977-10-20 00:00:00	胡自容	510781197710206002
0	377	2	3	3	103310240002	510702197103105415	1	42	2	2	2	1	1	3	1	1	1	1	166.0	83.8	100.0	30.4108	135	92	158	12.59	290.64	29.41	8.71	8.85	5.91	0	12.59	0.341	1.4	8.71	0	290.64	0.277	1.47	8.85	0	29.41	\N	\N	5.91	1971-03-10 00:00:00	李正远	510702197103105415
0	378	2	3	3	103310180070	510702196303015452	1	50	3	3	3	1	1	3	2	1	1	1	160.0	57.8	84.0	22.5781	164	100	125	8.66	5.84	89.99	8.34	3.26	8.73	0	8.66	0.304	0.78	8.34	0.43	5.84	1.68	0.08	3.26	0	89.99	\N	\N	8.73	1963-03-01 00:00:00	唐毅	510702196303015452
0	379	2	3	3	103310180069	510722197408157422	2	39	2	2	2	1	1	3	1	1	1	1	154.0	57.2	82.0	24.1187	142	91	14	0	14.47	408.04	0.08	4.93	2.24	0	0	0.337	1.97	0.08	1.52	14.47	3.83	0.03	4.93	0	408.04	\N	\N	2.24	1974-08-15 00:00:00	张红梅	510722197408157422
0	380	2	3	3	103310180043	510702195402085443	2	59	3	3	3	1	1	3	-1	-1	2	2	150.0	55.6	90.0	24.7111	154	87	17	37.95	828.16	3.63	2.35	2.99	0.24	0	37.95	0.336	1.37	2.35	0	828.16	0.327	1.36	2.99	0	3.63	\N	\N	0.24	1954-02-08 00:00:00	张秀英	510702195402085443
0	381	2	3	3	103310110015	510703197906303825	2	34	2	2	1	1	1	3	1	1	1	1	160.0	60.6	84.0	23.6719	112	67	29	31.85	119.94	1.64	0.68	0.76	7.25	0	31.85	0.326	1.52	0.68	0	119.94	0.323	1.61	0.76	0	1.64	\N	\N	7.25	1979-06-30 00:00:00	文容	510703197906303825
0	383	2	3	2	103309230114	510702196309085419	1	50	3	3	3	1	1	3	1	1	2	2	165.0	75.6	90.0	27.7686	130	76	48	18.1	\N	110.8	0.006	\N	5.09	0.03	18.1	\N	\N	0.006	\N	\N	\N	\N	\N	0	110.8	\N	\N	5.09	1963-09-08 00:00:00	詹章荣	510702196309085419
0	384	2	3	3	103309060079	510702195408265410	1	59	3	3	3	1	1	3	2	1	2	2	156.0	60.9	87.0	25.0247	158	84	88	12.72	35.22	14.88	1.34	1.34	1.49	0	12.72	0.326	1.44	1.34	0	35.22	0.346	1.65	1.34	0	14.88	\N	\N	1.49	1954-08-26 00:00:00	谢志友	510702195408265410
0	385	2	3	3	103308270033	510626199106255122	2	22	1	1	1	1	2	3	1	1	1	1	160.0	60.8	73.0	23.75	121	66	13	4.61	303.68	808.48	0.12	0.08	0.05	0.03	4.61	1.168	1.28	0.12	0	303.68	0.362	1.69	0.08	0.01	808.48	\N	\N	0.05	1991-06-25 00:00:00	代敏	510626199106255122
0	387	2	3	3	103312230001	513026197212125680	2	41	2	2	2	1	1	3	1	1	1	1	160.0	48.5	72.0	18.9453	137	84	14	5.08	20.84	7.28	6.75	9.02	8.55	0.01	5.08	0.94	0.18	6.75	0	20.84	0.306	0.14	9.02	0	7.28	\N	\N	8.55	1972-12-12 00:00:00	李春芳	513026197212125680
0	388	2	3	1	103309220078	510802197505022204	2	38	2	2	2	1	1	3	1	1	1	1	158.0	55.1	78.0	22.0718	130	83	33	1.56	68.88	\N	0.09	0.09	\N	0	1.56	0.385	0.3	0.09	0.01	68.88	0.334	1.86	0.09	\N	\N	\N	\N	\N	1975-05-02 00:00:00	张秀蓉	510802197505022204
0	389	2	3	3	103310200017	510703199509293116	1	18	1	1	1	1	1	3	-1	-1	1	1	173.0	53.5	72.0	17.8756	105	68	40	0	1001	35.68	1.5	0.09	7.27	-2	0	\N	\N	1.5	0	1001	0.354	1.88	0.09	0	35.68	\N	\N	7.27	1995-09-29 00:00:00	廖磊	510703199509293116
0	390	2	3	3	103309200065	510703198012273115	1	32	2	2	1	1	1	3	3	2	1	1	165.0	65.6	78.0	24.0955	120	83	24	4.51	17.41	140.53	0.07	0.05	1.39	0	4.51	0.761	1.22	0.07	0	17.41	0.303	1.89	0.05	0.02	140.53	\N	\N	1.39	1980-12-27 00:00:00	赵宗治	510703198012273115
0	391	2	3	3	103308140024	510702196111095419	1	51	3	3	3	1	3	3	2	1	1	1	169.0	71.3	86.0	24.9641	133	86	147	0.13	5.17	0.8	6.59	6.29	6.79	0	0.13	0.288	0.2	6.59	0	5.17	0.324	0.37	6.29	0	0.8	\N	\N	6.79	1961-11-09 00:00:00	王申玉	510702196111095419
0	393	2	3	3	103310280035	510702195710185526	2	56	3	3	3	1	1	3	1	1	1	1	152.0	46.7	72.0	20.213	120	66	14	0	136.57	1001	0.005	6.95	5.75	0.01	0	\N	\N	0.005	0	136.57	0.343	1.45	6.95	0	1001	\N	\N	5.75	1957-10-18 00:00:00	龙顺琼	510702195710185526
0	395	2	3	3	103310040167	510703199508083117	1	18	1	1	1	1	2	3	-1	-1	1	1	170.0	57.4	68.0	19.8616	98	48	17	31.75	1001	2.22	0.14	1.26	0.12	0	31.75	0.325	1.85	0.14	0	1001	0.304	0.71	1.26	0	2.22	\N	\N	0.12	1995-08-08 00:00:00	秦秋平	510703199508083117
0	397	2	3	3	103309200063	511121197904258523	2	34	2	2	1	1	1	3	1	1	1	1	150.0	46.8	70.0	20.8	117	71	48	47.9	97.7	18.96	0.065	3.14	8.16	0.01	47.9	\N	\N	0.065	0	97.7	0.291	0.73	3.14	0	18.96	\N	\N	8.16	1979-04-25 00:00:00	王正英	511121197904258523
0	398	2	3	3	103312270006	51070319860402311X	1	27	1	1	1	1	1	3	2	2	1	1	172.0	58.0	70.0	19.6052	134	82	26	27.61	1001	1001	9.49	9.39	8.74	0	27.61	0.323	0.03	9.49	0	1001	0.19	0.03	9.39	0	1001	\N	\N	8.74	1986-04-02 00:00:00	邓伟	51070319860402311X
0	400	2	3	3	103309120009	510702197206105426	2	41	2	2	2	1	1	3	1	1	1	1	158.0	61.1	80.0	24.4752	120	50	17	287.75	1001	269.74	1.96	1.82	0.09	0	287.75	0.36	1.54	1.96	0	1001	0.315	1.44	1.82	0	269.74	\N	\N	0.09	1972-06-10 00:00:00	谢素蓉	510702197206105426
3	401	2	3	3	103311020011	510703199701053286	2	16	1	1	1	1	1	3	-1	-1	1	1	155.0	48.6	64.0	20.2289	99	59	31	156.18	1001	83.74	0.15	0.21	4.93	0	156.18	0.347	1.8	0.15	0	1001	0.303	1.73	0.21	0	83.74	\N	\N	4.93	1997-01-05 00:00:00	田亚梅	510703199701053286
0	402	2	3	3	103309020085	510702197802105422	2	35	2	2	2	1	1	3	1	1	1	1	155.0	50.8	74.0	21.1446	110	69	20	25.72	57.34	3.38	3.07	2.44	1.58	0	25.72	0.296	0.75	3.07	0	57.34	0.2723	0.79	2.44	0	3.38	\N	\N	1.58	1978-02-10 00:00:00	傅玉琼	510702197802105422
0	403	2	3	3	103311170009	510702195707195424	2	56	3	3	3	1	1	3	1	1	1	1	152.0	63.4	89.0	27.4411	140	80	46	82.66	1001	30.52	1.3	1.21	7.93	0	82.66	0.303	1.8	1.3	0	1001	0.321	1.65	1.21	0	30.52	\N	\N	7.93	1957-07-19 00:00:00	贾翠环	510702195707195424
0	404	2	3	3	103309300082	510702196206185417	1	51	3	3	3	1	1	3	1	2	1	1	165.0	71.2	90.0	26.1524	136	89	60	>1000	1001	1001	7.57	7.23	6.53	0	>1000	0.314	0.34	7.57	0	1001	0.328	0.32	7.23	0	1001	\N	\N	6.53	1962-06-18 00:00:00	张兴华	510702196206185417
0	406	2	3	3	103309210011	510702195508185434	1	58	3	3	3	1	1	3	1	1	1	1	170.0	61.2	84.0	21.1765	135	75	30	6	46	253.22	3.03	3.44	8.65	0	6	0.304	1.42	3.03	0	46	0.285	1.37	3.44	0	253.22	\N	\N	8.65	1955-08-18 00:00:00	周昌华	510702195508185434
0	408	2	3	3	103312300009	510602196005033745	2	53	3	3	3	1	1	3	1	1	1	1	146.0	60.0	82.0	28.1479	107	64	26	8.6	5.38	1.1	2.44	1.42	1.32	0	8.6	0.291	1.47	2.44	0.01	5.38	0.452	1.15	1.42	0	1.1	\N	\N	1.32	1960-05-03 00:00:00	李念凤	510602196005033745
0	412	2	3	3	103309040125	510702197809295425	2	34	2	2	1	1	1	3	1	1	1	1	156.0	48.0	72.0	19.7239	102	59	19	18.43	12.69	168.74	7.95	8.18	7.19	0	18.43	0.304	0.1	7.95	0	12.69	0.308	0.1	8.18	0	168.74	\N	\N	7.19	1978-09-29 00:00:00	董见红	510702197809295425
0	413	2	3	3	103309040122	510702197407135410	1	39	2	2	2	1	1	3	2	2	1	1	168.0	62.7	78.0	22.2151	127	79	18	0	1001	946.07	1.48	0.3	0.29	-2	0	\N	\N	1.48	0	1001	0.342	1.54	0.3	0	946.07	\N	\N	0.29	1974-07-13 00:00:00	周祖洪	510702197407135410
0	414	2	3	3	103309190010	510703198708022621	2	26	1	1	1	1	1	3	1	1	1	1	165.0	56.1	83.0	20.6061	139	80	19	0.02	50.61	355.5	0.26	0.18	0.2	0	0.02	0.309	1.81	0.26	0	50.61	0.319	1.77	0.18	0	355.5	\N	\N	0.2	1987-08-02 00:00:00	邓丽娟	510703198708022621
0	415	2	3	3	103309160022	510702196306095427	2	50	3	3	3	1	1	3	1	3	1	1	162.0	68.0	88.0	25.9107	122	75	23	4.3	83.41	71.45	0.005	0.36	5.84	0.01	4.3	\N	\N	0.005	0	83.41	0.341	1.63	0.36	0	71.45	\N	\N	5.84	1963-06-09 00:00:00	谢桂琼	510702196306095427
0	416	2	3	3	103308010031	510702195412235468	2	58	3	3	3	1	1	3	1	1	1	1	147.0	49.0	71.0	22.6757	139	89	20	19.77	272.32	50.35	9.11	8.86	8.28	0	19.77	0.271	0.81	9.11	0	272.32	0.359	1.22	8.86	0	50.35	\N	\N	8.28	1954-12-23 00:00:00	李昌凤	510702195412235468
0	417	2	3	2	103309190012	510602197011204269	2	42	2	2	2	1	1	3	1	1	1	1	150.0	45.1	70.0	20.0444	104	70	22	0.79	\N	28.73	0.14	\N	0.12	0	0.79	0.286	1.78	0.14	\N	\N	\N	\N	\N	0	28.73	\N	\N	0.12	1970-11-20 00:00:00	余术华	510602197011204269
0	419	2	3	3	103310130012	510703197903133111	1	34	2	2	1	1	1	3	-1	-1	1	1	168.0	69.3	83.0	24.5536	130	73	36	0	11.14	534.86	0.11	0.32	1.53	0	0	0.297	1.82	0.11	0	11.14	0.339	1.78	0.32	0	534.86	\N	\N	1.53	1979-03-13 00:00:00	周代长	510703197903133111
0	420	2	3	2	103309190002	510602196911194807	2	43	2	2	2	1	1	3	1	1	1	1	150.0	60.3	91.0	26.8	114	77	21	48.47	\N	624.17	4.69	\N	7.44	0	48.47	1.578	0.36	4.69	\N	\N	\N	\N	\N	0	624.17	\N	\N	7.44	1969-11-19 00:00:00	谢桂芳	510602196911194807
0	426	2	3	3	103309250039	510702195309265423	2	59	3	3	3	1	1	3	1	1	1	1	140.0	52.5	86.0	26.7857	143	75	32	21.3	110.37	53.66	7.45	6.7	5.43	0	21.3	0.308	1.4	7.45	0	110.37	0.312	1.42	6.7	0.01	53.66	\N	\N	5.43	1953-09-26 00:00:00	邓会英	510702195309265423
0	427	2	3	2	103310240029	510702197106226327	2	42	2	2	2	1	1	3	1	1	1	1	152.0	42.2	77.0	18.2652	110	74	6	9.7	\N	28.36	0.005	\N	7.33	-2	9.7	\N	\N	0.005	\N	\N	\N	\N	\N	0	28.36	\N	\N	7.33	1971-06-22 00:00:00	甘云兰	510702197106226327
0	437	2	3	3	103309160092	510702197502095429	2	38	2	2	2	1	1	3	1	1	1	1	152.0	50.6	72.0	21.901	131	73	14	0	18.96	0.56	0.25	0.11	0.08	0	0	0.378	2.04	0.25	0	18.96	0.321	1.71	0.11	0	0.56	\N	\N	0.08	1975-02-09 00:00:00	白小春	510702197502095429
0	438	2	3	3	103309060036	510702196210165419	1	50	3	3	3	1	1	3	2	1	1	1	160.0	51.2	65.0	20	120	76	36	2.25	18.89	62.36	5.43	6.04	7.89	0	2.25	0.369	1.21	5.43	0	18.89	0.342	1.27	6.04	0	62.36	\N	\N	7.89	1962-10-16 00:00:00	杨兴成	510702196210165419
0	441	2	3	3	103310040079	510921198105158443	2	32	2	2	1	1	1	3	1	1	1	1	160.0	58.0	70.0	22.6562	113	71	14	2.35	26.07	29.56	7.05	8.62	7.84	0	2.35	0.279	1.07	7.05	0	26.07	0.338	1.18	8.62	0	29.56	\N	\N	7.84	1981-05-15 00:00:00	胡明英	510921198105158443
0	442	2	3	3	103310040078	510703198006183113	1	33	2	2	1	1	2	3	-1	-1	1	1	174.0	74.0	81.0	24.4418	136	81	21	6.95	105	253.37	6.1	6.1	1.3	0	6.95	0.311	1.11	6.1	0	105	0.339	1.24	6.1	0.04	253.37	\N	\N	1.3	1980-06-18 00:00:00	刘定胜	510703198006183113
0	443	2	3	3	103311160004	510702197502255410	1	38	2	2	2	1	1	3	1	3	1	1	165.0	82.2	94.0	30.1928	133	84	23	10.51	58.97	16.51	3.65	4.45	3.07	0	10.51	0.47	1.05	3.65	0.01	58.97	0.31	1.2	4.45	0	16.51	\N	\N	3.07	1975-02-25 00:00:00	郭永双	510702197502255410
0	444	2	3	3	103308230024	510702195404235425	2	59	3	3	3	1	3	3	1	1	2	2	155.0	63.7	90.0	26.514	178	95	35	20.26	97.33	19.96	0.29	0.27	0.14	0	20.26	0.645	1.7	0.29	0	97.33	0.35	1.96	0.27	0	19.96	\N	\N	0.14	1954-04-23 00:00:00	李秀琼	510702195404235425
0	445	2	3	3	103309120016	510702195908225423	2	54	3	3	3	1	1	3	1	1	1	1	147.0	42.9	64.0	19.8528	111	63	28	7.43	198.82	18.25	8.17	8.74	8.66	0	7.43	0.354	0.29	8.17	0	198.82	0.311	0.29	8.74	0.01	18.25	\N	\N	8.66	1959-08-22 00:00:00	李秀琼	510702195908225423
0	447	2	3	3	103309040094	510702197503025422	2	38	2	2	2	1	1	3	1	1	1	1	156.0	65.9	83.0	27.0792	121	82	38	0	12.62	55.33	0.005	6.89	8.85	-2	0	\N	\N	0.005	0	12.62	0.292	1.37	6.89	0	55.33	\N	\N	8.85	1975-03-02 00:00:00	郭燕	510702197503025422
0	448	2	3	3	103308270029	510702197808175421	2	35	2	2	2	1	2	3	1	1	1	1	165.0	53.3	62.0	19.5776	101	58	18	41.04	358.06	136.22	5.33	6.95	5.58	0.02	41.04	1.29	0.5	5.33	0	358.06	0.3273	0.39	6.95	0	136.22	\N	\N	5.58	1978-08-17 00:00:00	郑桂群	510702197808175421
0	449	2	3	3	103308010022	510702195507245415	1	58	3	3	3	1	1	3	1	1	1	1	164.0	63.0	86.0	23.4236	133	88	34	16.34	19.84	17.09	9.09	9.48	7.34	0	16.34	0.275	0.31	9.09	0	19.84	0.3	0.31	9.48	0	17.09	\N	\N	7.34	1955-07-24 00:00:00	谢代坤	510702195507245415
0	450	2	3	3	103307310028	510702196202105520	2	51	3	3	3	1	3	3	1	1	1	1	147.0	54.0	77.0	24.9896	117	75	39	205.13	617.69	264.1	5.07	6.2	5.15	0	205.13	0.312	1.15	5.07	0.01	617.69	0.31	1.05	6.2	0	264.1	\N	\N	5.15	1962-02-10 00:00:00	杨秀如	510702196202105520
0	452	2	3	3	103308270027	510702195405155427	2	59	3	3	3	1	1	3	1	1	1	1	160.0	53.8	68.0	21.0156	127	67	19	7.42	55.37	222.25	1.55	1.74	1.43	0	7.42	0.438	1.78	1.55	0	55.37	0.319	1.59	1.74	0	222.25	\N	\N	1.43	1954-05-15 00:00:00	周桂英	510702195405155427
0	453	2	3	3	103310070068	510702197310085429	2	39	2	2	2	1	1	3	1	1	1	1	161.0	57.2	72.0	22.067	115	66	16	34.18	666.85	108.75	5.11	0.82	4.65	0	34.18	0.62	1.09	5.11	0	666.85	0.362	1.52	0.82	0	108.75	\N	\N	4.65	1973-10-08 00:00:00	邓秀华	510702197310085429
0	455	2	3	3	103308040023	51070219570506544X	2	56	3	3	3	1	1	3	1	1	1	1	153.0	61.4	83.0	26.2292	155	102	62	0	0.57	0.43	0.005	10.37	9.73	0.02	0	\N	\N	0.005	0.31	0.57	0.378	0.01	10.37	0.45	0.43	\N	\N	9.73	1957-05-06 00:00:00	杨光惠	51070219570506544X
0	459	2	3	3	103309290008	510703199211273120	2	20	1	1	1	1	2	3	1	1	1	1	155.0	45.6	74.0	18.9802	104	57	12	22	49.66	37.29	1.47	0.19	4.9	-2	22	\N	\N	1.47	0	49.66	0.346	1.82	0.19	0	37.29	\N	\N	4.9	1992-11-27 00:00:00	刘蓉梅	510703199211273120
0	461	2	3	2	103309260020	510702195703015414	1	56	3	3	3	1	1	3	1	1	1	1	163.0	59.8	80.0	22.5074	109	73	18	0.1	\N	2.61	10.22	\N	7.02	0.04	0.1	0.296	0.38	10.22	\N	\N	\N	\N	\N	0.03	2.61	\N	\N	7.02	1957-03-01 00:00:00	周连开	510702195703015414
0	462	2	3	3	103308290032	510722198909108682	2	23	1	1	1	1	1	3	1	1	1	1	160.0	60.1	77.0	23.4766	108	68	25	40.22	412.34	197.59	9.45	9.18	8.66	0	40.22	0.301	0.34	9.45	0	412.34	0.293	0.37	9.18	0.01	197.59	\N	\N	8.66	1989-09-10 00:00:00	赵丹	510722198909108682
2	463	2	3	1	103308280020	510703199810293123	2	14	0	0	0	1	1	3	-1	-1	1	1	155.0	45.7	62.0	19.0219	109	63	37	14.65	410.64	\N	0.15	0.15	\N	0	14.65	0.32	1.23	0.15	0.43	410.64	0.337	1.24	0.15	\N	\N	\N	\N	\N	1998-10-29 00:00:00	廖映雪	510703199810293123
0	464	2	3	3	103309270094	51072219871216586X	2	25	1	1	1	1	1	3	1	1	1	1	150.0	57.2	78.0	25.4222	135	74	40	157.65	233.65	109	2.05	2.18	9.04	0	157.65	0.501	1.06	2.05	0	233.65	0.325	1.3	2.18	0	109	\N	\N	9.04	1987-12-16 00:00:00	唐小春	51072219871216586X
0	465	2	3	3	103311100013	510702196304225419	1	50	3	3	3	1	1	3	1	1	1	1	160.0	73.7	94.0	28.7891	164	94	20	7.51	14.63	41.16	10.11	0.23	4.75	0	7.51	0.297	0.1	10.11	0	14.63	0.364	1.25	0.23	0	41.16	\N	\N	4.75	1963-04-22 00:00:00	赖仁富	510702196304225419
0	466	2	3	3	103310040046	51070319851209202X	2	27	1	1	1	1	1	3	-1	-1	1	1	156.0	57.3	80.0	23.5454	114	77	32	0	20.2	3.41	0.12	0.01	0.05	0	0	0.309	1.89	0.12	0	20.2	1.89	0.06	0.01	0	3.41	\N	\N	0.05	1985-12-09 00:00:00	陈万芳	51070319851209202X
0	467	2	3	2	103310040045	510703198104223115	1	32	2	2	1	1	1	3	-1	-1	1	1	166.0	78.0	90.0	28.306	146	104	59	0	\N	7.42	0.11	\N	0.11	0	0	0.319	1.99	0.11	\N	\N	\N	\N	\N	0	7.42	\N	\N	0.11	1981-04-22 00:00:00	周健	510703198104223115
0	468	2	3	3	103309040121	510702196104145414	1	52	3	3	3	1	1	3	3	3	1	1	165.0	58.4	87.0	21.4509	114	73	55	34.52	660.33	173.81	0.21	1.02	0.51	0	34.52	0.314	1.55	0.21	0.28	660.33	1.15	1.39	1.02	0	173.81	\N	\N	0.51	1961-04-14 00:00:00	谭清元	510702196104145414
0	469	2	3	3	103310070020	510702196301145421	2	50	3	3	3	1	1	3	1	1	1	1	150.0	50.0	74.0	22.2222	123	69	45	1.23	119.21	4.91	4.38	4.72	4.13	0	1.23	0.305	1.25	4.38	0	119.21	0.312	1.1	4.72	0	4.91	\N	\N	4.13	1963-01-14 00:00:00	向光丽	510702196301145421
0	470	2	3	3	103308300047	510702196302155410	1	50	3	3	3	1	3	3	2	1	1	1	136.0	43.4	70.0	23.4645	93	61	40	5.31	45.61	73.06	7.36	8.26	7.52	0	5.31	0.362	1.14	7.36	0	45.61	0.333	1.15	8.26	0.04	73.06	\N	\N	7.52	1963-02-15 00:00:00	郑福国	510702196302155410
0	471	2	3	3	103309240169	510702197708075423	2	36	2	2	2	2	2	3	1	1	1	1	155.0	54.6	81.0	22.7263	114	71	27	56.26	699.08	17.75	0.68	0.96	8.53	0	56.26	0.822	1.32	0.68	0.45	699.08	0.545	1.34	0.96	0	17.75	\N	\N	8.53	1977-08-07 00:00:00	李红	510702197708075423
0	472	2	3	3	103309120054	510702197711055415	1	35	2	2	2	1	1	3	1	2	1	1	160.0	65.4	89.0	25.5469	110	59	33	5.29	72.94	537.88	8.95	9.8	8.29	0	5.29	0.315	0.95	8.95	0	72.94	0.378	0.88	9.8	0	537.88	\N	\N	8.29	1977-11-05 00:00:00	谢发志	510702197711055415
0	474	2	3	3	103308020013	510703199207123146	2	21	1	1	1	1	2	3	-1	-1	1	1	153.0	35.2	58.0	15.037	123	84	15	9.68	339.03	632.7	0.15	0.1	8.98	0	9.68	0.31	1.63	0.15	0	339.03	0.298	1.76	0.1	0	632.7	\N	\N	8.98	1992-07-12 00:00:00	雷婷婷	510703199207123146
0	476	2	3	1	103312250010	510702197508195420	2	38	2	2	2	1	1	3	1	1	1	1	154.0	52.5	78.0	22.137	130	82	13	23.28	257.7	\N	4.55	5.35	\N	0	23.28	0.291	1.27	4.55	0	257.7	0.337	1.2	5.35	\N	\N	\N	\N	\N	1975-08-19 00:00:00	杨顺蓉	510702197508195420
0	479	2	3	3	103310040153	510703199708053115	1	16	1	1	1	1	2	3	1	1	1	1	165.0	45.8	60.0	16.8228	108	70	10	1.53	950.63	1001	0.13	0.07	0.15	0.01	1.53	0.315	1.88	0.13	0	950.63	0.301	1.71	0.07	0	1001	\N	\N	0.15	1997-08-05 00:00:00	李锐	510703199708053115
0	480	2	3	2	103308130035	510703199806273111	1	15	1	1	1	1	1	3	1	1	1	1	161.0	41.8	64.0	16.1259	105	65	63	2.12	\N	377.48	0.15	\N	0.08	0	2.12	0.299	1.84	0.15	\N	\N	\N	\N	\N	0	377.48	\N	\N	0.08	1998-06-27 00:00:00	郭雨	510703199806273111
0	484	2	3	3	103308300100	510702197803255414	1	35	2	2	2	1	1	3	1	1	1	1	170.0	68.0	80.0	23.5294	131	80	43	0	74.54	10.35	1.71	0.23	3.47	0.04	0	\N	\N	1.71	0	74.54	0.319	1.65	0.23	0	10.35	\N	\N	3.47	1978-03-25 00:00:00	王坤	510702197803255414
0	485	2	3	3	103309030077	510722198208165641	2	31	2	2	1	1	1	3	1	1	1	1	160.0	49.8	67.0	19.4531	119	76	24	7.13	1001	176.7	6.05	5.93	7.85	0	7.13	0.296	0.49	6.05	0	1001	0.35	0.49	5.93	1.2	176.7	\N	\N	7.85	1982-08-16 00:00:00	张燕	510722198208165641
0	487	2	3	2	103309060040	510702197708115413	1	36	2	2	2	1	3	3	2	2	1	1	165.0	57.4	69.0	21.0836	101	49	20	33.67	\N	140.67	0.9	\N	7.6	0	33.67	0.37	8.58	0.9	\N	\N	\N	\N	\N	0.01	140.67	\N	\N	7.6	1977-08-11 00:00:00	邹能贵	510702197708115413
0	488	2	3	3	103309060043	510722197608107665	2	37	2	2	2	1	1	3	1	1	1	1	146.0	44.5	72.0	20.8763	120	74	14	14.136	278.18	99.23	3.77	3.67	3.79	0	14.136	0.328	1.53	3.77	0	278.18	0.426	1.58	3.67	0	99.23	\N	\N	3.79	1976-08-10 00:00:00	蒋琼芳	510722197608107665
0	490	2	3	2	103310180074	510702197502266427	2	38	2	2	2	1	1	3	1	1	1	1	155.0	46.0	65.0	19.1467	120	66	10	5.39	\N	825.82	5.33	\N	4.24	0	5.39	0.349	1.43	5.33	\N	\N	\N	\N	\N	0	825.82	\N	\N	4.24	1975-02-26 00:00:00	王桂兰	510702197502266427
0	491	2	3	3	103309020071	510703198206203115	1	31	2	2	1	1	1	3	2	2	1	1	166.0	55.0	72.0	19.9594	117	67	23	25.5	530.08	48.65	8.38	8.23	7.82	0	25.5	0.351	1.06	8.38	0	530.08	0.3	0.98	8.23	0	48.65	\N	\N	7.82	1982-06-20 00:00:00	郭永建	510703198206203115
0	492	2	3	2	103312260006	510703198906113110	1	24	1	1	1	1	1	3	-1	-1	1	1	170.0	86.0	88.0	29.7578	137	68	37	36.83	\N	686.6	0.93	\N	0.91	0	36.83	0.323	1.59	0.93	\N	\N	\N	\N	\N	0	686.6	\N	\N	0.91	1989-06-11 00:00:00	吴友刚	510703198906113110
0	493	2	3	3	103309030052	510726197609254822	2	36	2	2	2	1	1	3	1	1	1	1	160.0	76.3	93.0	29.8047	118	81	27	0.75	104.49	118.33	8.84	8.76	8.8	0	0.75	0.319	0.71	8.84	0	104.49	0.299	0.8	8.76	0	118.33	\N	\N	8.8	1976-09-25 00:00:00	徐位燕	510726197609254822
0	494	2	3	2	103308130003	510703199108183119	1	21	1	1	1	1	2	3	1	1	1	1	170.0	51.0	62.0	17.6471	119	76	16	0	\N	40.44	1.88	\N	0.14	0.01	0	\N	\N	1.88	\N	\N	\N	\N	\N	0	40.44	\N	\N	0.14	1991-08-18 00:00:00	李小明	510703199108183119
0	495	2	3	3	103309270145	510703198211223129	2	30	2	2	1	1	1	3	1	1	1	1	140.0	46.0	82.0	23.4694	125	73	30	0	3.89	0.81	0.11	0.06	0.06	0	0	0.306	1.85	0.11	0	3.89	0.292	1.72	0.06	0	0.81	\N	\N	0.06	1982-11-22 00:00:00	刘小兰	510703198211223129
0	497	2	3	3	103308300074	51070319870117311X	1	26	1	1	1	1	1	3	2	3	1	1	163.0	66.1	76.0	24.8786	122	62	95	0	89.7	366.77	0.04	0.03	2.42	0	0	0.327	1.93	0.04	0	89.7	0.349	1.82	0.03	0	366.77	\N	\N	2.42	1987-01-17 00:00:00	郭小虎	51070319870117311X
0	500	2	3	3	103309280027	152322197810271621	2	34	2	2	1	2	1	3	1	2	1	1	160.0	70.0	87.0	27.3437	123	71	17	11.01	237.12	391.13	8.92	9.54	8.56	0.01	11.01	0.319	1.27	8.92	0	237.12	0.296	1.2	9.54	0	391.13	\N	\N	8.56	1978-10-27 00:00:00	盖艳霞	152322197810271621
0	501	2	3	3	103310040021	511132198907101744	2	24	1	1	1	1	2	3	1	1	1	1	166.0	58.9	72.0	21.3747	118	74	13	0.5	26.27	39.33	0.23	0.2	0.12	0	0.5	0.298	1.9	0.23	0	26.27	0.301	1.89	0.2	0	39.33	\N	\N	0.12	1989-07-10 00:00:00	韩成玉	511132198907101744
0	502	2	3	3	103401200016	510702197705185416	1	36	2	2	2	1	1	3	2	2	1	1	155.0	59.0	80.0	24.5578	140	78	35	0	1.58	8.1	1.89	0.06	8.1	0.01	0	\N	\N	1.89	0	1.58	2.882	2.19	0.06	0	8.1	\N	\N	8.1	1977-05-18 00:00:00	詹勇	510702197705185416
0	503	2	3	3	103309040074	51070319920317312X	2	21	1	1	1	1	2	3	-1	-1	1	1	160.0	44.3	62.0	17.3047	112	89	22	60.33	1001	0.17	0.17	0.15	0.19	0	60.33	0.286	1.85	0.17	0	1001	0.324	1.58	0.15	0	0.17	\N	\N	0.19	1992-03-17 00:00:00	赖婷婷	51070319920317312X
0	504	2	3	3	103309060072	510602197912244268	2	33	2	2	1	1	1	3	1	1	1	1	160.0	53.5	72.0	20.8984	105	64	37	0	127	241.32	0.16	0.09	0.06	0	0	0.276	1.79	0.16	0	127	0.268	1.34	0.09	0	241.32	\N	\N	0.06	1979-12-24 00:00:00	金义娇	510602197912244268
0	505	2	3	3	103310260023	510703199707213113	1	16	1	1	1	1	1	3	-1	-1	1	1	156.0	52.2	76.0	21.4497	140	81	7	0.93	123.23	34.63	0.1	0.1	0.08	0	0.93	0.342	1.71	0.1	0	123.23	0.323	1.86	0.1	0	34.63	\N	\N	0.08	1997-07-21 00:00:00	李钊	510703199707213113
0	506	2	3	3	103309180095	510703198901093122	2	24	1	1	1	1	1	3	1	1	1	1	155.0	45.9	64.0	19.1051	114	79	17	30.84	1001	344.86	9.19	0.06	0.05	0	30.84	0.301	0.29	9.19	0	1001	0.29	1.68	0.06	0	344.86	\N	\N	0.05	1989-01-09 00:00:00	李春	510703198901093122
0	508	2	3	3	103308280062	51070319890605312X	2	24	1	1	1	1	1	3	-1	-1	1	1	155.0	43.0	63.0	17.898	104	58	21	0	108.13	37.77	0.14	0.13	0.11	0	0	0.316	1.86	0.14	0	108.13	0.319	1.73	0.13	0	37.77	\N	\N	0.11	1989-06-05 00:00:00	谢建红	51070319890605312X
0	510	2	3	3	103310040137	513029198506065787	2	28	1	1	1	1	3	3	1	1	1	1	156.0	47.3	66.0	19.4362	136	71	8	0.01	38.02	3.28	0.1	0.09	0.09	0.01	0.01	0.337	1.89	0.1	0	38.02	0.326	1.92	0.09	0	3.28	\N	\N	0.09	1985-06-06 00:00:00	邱启春	513029198506065787
0	512	2	3	3	103308130001	510702197709155521	2	35	2	2	2	1	1	3	1	1	1	1	155.0	63.0	78.0	26.2227	104	69	13	0.04	13.58	13.53	0.32	0.1	0.16	0	0.04	0.306	1.84	0.32	0	13.58	0.33	1.76	0.1	0	13.53	\N	\N	0.16	1977-09-15 00:00:00	刘碧英	510702197709155521
3	513	2	3	2	103309260067	510703198909123146	2	24	1	1	1	1	1	3	1	1	1	1	154.0	50.0	75.0	21.0828	126	81	28	0	\N	122.01	0.12	\N	0.09	0	0	0.299	1.87	0.12	\N	\N	\N	\N	\N	0.01	122.01	\N	\N	0.09	1989-09-12 00:00:00	赵丹丹	510703198909123146
0	516	2	3	3	103310310028	51070319930806312X	2	20	1	1	1	1	1	3	1	1	1	1	152.0	49.3	66.0	21.3383	119	76	6	2.1	1001	207.69	1.86	0.21	0.13	0.03	2.1	\N	\N	1.86	0	1001	0.295	1.68	0.21	0	207.69	\N	\N	0.13	1993-08-06 00:00:00	谢静	51070319930806312X
0	519	2	3	3	103311010027	510702197811225418	1	34	2	2	1	1	1	3	1	1	2	2	164.0	69.5	88.0	25.8403	134	92	58	15.9	910.25	7.46	1.94	2.52	8.7	-2	15.9	\N	\N	1.94	0	910.25	0.322	1.66	2.52	0.04	7.46	\N	\N	8.7	1978-11-22 00:00:00	廖绪林	510702197811225418
0	520	2	3	3	103308050055	510626198409085111	1	28	1	1	1	1	1	3	-1	-1	1	1	170.0	76.7	93.0	26.5398	125	84	56	0	38.28	64.68	0.19	0.318	0.17	0	0	0.284	1.94	0.19	0.03	38.28	0.533	1.73	0.318	0	64.68	\N	\N	0.17	1984-09-08 00:00:00	周奠斌	510626198409085111
0	521	2	3	3	103309130050	510703198106011335	1	32	2	2	1	1	1	3	2	1	1	1	176.0	90.5	96.0	29.2162	114	65	36	>1000	1001	1.89	2.61	2.48	6.37	0	>1000	0.312	1.53	2.61	0	1001	0.337	1.6	2.48	0	1.89	\N	\N	6.37	1981-06-01 00:00:00	苏刚	510703198106011335
0	523	2	3	3	103401250022	510703198204293129	2	31	2	2	1	1	1	3	1	1	1	1	150.0	60.0	76.0	26.6667	148	68	13	812.1	700.86	185.74	0.006	8.66	8.83	0.01	812.1	\N	\N	0.006	0	700.86	0.309	0.03	8.66	0	185.74	\N	\N	8.83	1982-04-29 00:00:00	曾礼萍	510703198204293129
0	524	2	3	2	103309280095	510703198212023110	1	30	2	2	1	1	1	3	1	1	1	1	165.0	55.8	70.0	20.4959	110	70	16	86.38	\N	183.31	8.07	\N	7.24	0	86.38	2.98	1	8.07	\N	\N	\N	\N	\N	0.01	183.31	\N	\N	7.24	1982-12-02 00:00:00	谢建辉	510703198212023110
3	525	2	3	2	103309280094	51070319870613382X	2	26	1	1	1	1	1	3	1	1	1	1	169.0	50.0	73.0	17.5064	102	62	23	56	\N	1001	1.84	\N	0.07	-2	56	\N	\N	1.84	\N	\N	\N	\N	\N	0	1001	\N	\N	0.07	1987-06-13 00:00:00	梅玲	51070319870613382X
3	527	2	3	2	103309290054	510722198608100820	2	27	1	1	1	1	1	3	1	1	1	1	170.0	58.3	76.0	20.173	136	68	78	0	\N	546.48	0.848	\N	1.23	-2	0	\N	\N	0.848	\N	\N	\N	\N	\N	0	546.48	\N	\N	1.23	1986-08-10 00:00:00	陈钱容	510722198608100820
0	530	2	3	3	103309230076	510703199308113123	2	20	1	1	1	1	2	3	-1	-1	1	1	165.0	50.0	61.0	18.3655	98	70	12	0.04	88.78	1.32	0.09	0.35	2.68	0	0.04	0.332	1.63	0.09	0	88.78	0.319	1.89	0.35	0.01	1.32	\N	\N	2.68	1993-08-11 00:00:00	李桂如	510703199308113123
0	531	2	3	3	103309160064	510703198412263119	1	28	1	1	1	1	1	3	-1	-1	1	1	174.0	78.9	86.0	26.0602	136	80	23	0	2.46	1.94	0.005	9.96	9.17	0.02	0	\N	\N	0.005	0	2.46	0.318	0.7	9.96	0	1.94	\N	\N	9.17	1984-12-26 00:00:00	李伯洪	510703198412263119
0	532	2	3	3	103308130030	510703198806143128	2	25	1	1	1	1	2	3	1	1	1	1	155.0	57.0	75.0	23.7253	121	65	20	0.15	14.17	12.73	0.13	0.25	0.12	0	0.15	0.306	1.74	0.13	0	14.17	0.338	1.97	0.25	0	12.73	\N	\N	0.12	1988-06-14 00:00:00	崔丹丹	510703198806143128
0	534	2	3	3	103308300012	510703199801083140	2	15	1	1	1	1	2	3	1	1	1	1	160.0	45.7	59.0	17.8516	105	62	6	0.31	1001	239.82	0.15	0.12	0.17	0	0.31	0.292	1.69	0.15	0.01	1001	0.384	1.65	0.12	0	239.82	\N	\N	0.17	1998-01-08 00:00:00	罗莉	510703199801083140
3	535	2	3	2	103310100022	510703198501153122	2	28	1	1	1	1	1	3	1	1	1	1	155.0	49.9	77.0	20.77	122	85	32	0.01	\N	363.76	0.1	\N	0.21	0	0.01	0.296	1.89	0.1	\N	\N	\N	\N	\N	0.01	363.76	\N	\N	0.21	1985-01-15 00:00:00	詹小英	510703198501153122
0	536	2	3	3	103312270005	510703198601143116	1	27	1	1	1	1	1	3	2	2	1	1	170.0	72.0	80.0	24.9135	136	88	28	0	415.59	22.52	0.14	0.13	0.09	0	0	0.304	1.69	0.14	0	415.59	0.329	1.18	0.13	0	22.52	\N	\N	0.09	1986-01-14 00:00:00	李奇	510703198601143116
0	538	2	3	3	103308090048	510703199605013110	1	17	1	1	1	1	2	3	-1	-1	1	1	170.0	54.0	66.0	18.6851	144	87	18	0	6.48	11.73	1.79	9.04	5.87	0.01	0	\N	\N	1.79	0	6.48	0.338	0.79	9.04	0	11.73	\N	\N	5.87	1996-05-01 00:00:00	纪鹏	510703199605013110
0	539	2	3	3	103309200132	51070319970820311X	1	16	1	1	1	1	2	3	1	1	1	1	170.0	54.1	68.0	18.7197	101	66	48	0	423.43	117.55	2.01	0.06	0.11	0.01	0	\N	\N	2.01	0	423.43	0.374	1.81	0.06	0	117.55	\N	\N	0.11	1997-08-20 00:00:00	李首国	51070319970820311X
2	541	2	3	3	103309200033	510703199810193114	1	14	0	0	0	1	1	3	1	1	1	1	165.0	47.7	68.0	17.5207	82	53	38	45.2	839.88	130.92	1.89	0.14	0.1	0.01	45.2	\N	\N	1.89	0	839.88	0.325	1.67	0.14	0	130.92	\N	\N	0.1	1998-10-19 00:00:00	李志豪	510703199810193114
0	542	2	3	3	103309060081	510703198404033129	2	29	1	1	1	1	1	3	1	1	1	1	160.0	46.4	66.0	18.125	110	64	24	0	15.88	52.31	1.82	0.14	1.99	0.01	0	\N	\N	1.82	0	15.88	1.81	1.51	0.14	0	52.31	\N	\N	1.99	1984-04-03 00:00:00	郑晓燕	510703198404033129
0	543	2	3	3	103309100061	510703198202172622	2	31	2	2	1	1	1	3	1	1	1	1	155.0	59.1	79.0	24.5994	130	94	28	69.3	104	261.47	0.005	8.28	8.39	0.01	69.3	\N	\N	0.005	0	104	0.308	1.33	8.28	0	261.47	\N	\N	8.39	1982-02-17 00:00:00	方春燕	510703198202172622
0	546	2	3	3	103309220013	510703199006203115	1	23	1	1	1	1	1	3	1	1	1	1	165.0	78.6	88.0	28.8705	140	118	252	8.8	404.36	157.58	1.9	0.12	0.17	-2	8.8	\N	\N	1.9	0.19	404.36	1.509	1.58	0.12	0	157.58	\N	\N	0.17	1990-06-20 00:00:00	李明	510703199006203115
0	548	2	3	3	103308090094	510602197902084264	2	34	2	2	1	1	1	3	1	1	1	1	145.0	44.0	63.0	20.9275	99	64	24	0	201.02	23.7	0.024	5.35	5.05	0.02	0	\N	\N	0.024	0	201.02	0.328	0.126	5.35	0	23.7	\N	\N	5.05	1979-02-08 00:00:00	范桂英	510602197902084264
0	550	2	3	3	103309130046	510703198804033128	2	25	1	1	1	1	1	3	1	1	1	1	160.0	46.2	62.0	18.0469	104	82	13	21.85	1001	1001	0.11	0.08	0.19	0	21.85	0.347	1.91	0.11	0	1001	0.34	1.66	0.08	0	1001	\N	\N	0.19	1988-04-03 00:00:00	谢春蓉	510703198804033128
0	551	2	3	3	103308010029	510703198512053127	2	27	1	1	1	1	1	3	1	1	1	1	155.0	44.9	68.0	18.6889	110	68	53	25.51	1001	191.17	8.88	9.27	7.2	0	25.51	0.329	0.5	8.88	0	1001	0.437	0.97	9.27	0	191.17	\N	\N	7.2	1985-12-05 00:00:00	曾全红	510703198512053127
0	554	2	3	3	103309020041	51070319811205311X	1	31	2	2	1	1	1	3	3	1	1	1	165.0	50.5	65.0	18.5491	96	65	30	19.8	1001	676.04	0.38	0.41	0.36	0	19.8	0.343	1.51	0.38	0	1001	0.325	1.69	0.41	0.01	676.04	\N	\N	0.36	1981-12-05 00:00:00	刘小明	51070319811205311X
0	555	2	3	3	103308210003	510702197310205021	2	39	2	2	2	1	1	3	1	1	1	1	155.0	61.4	80.0	25.5567	127	89	24	2.07	12.92	25.83	0.13	0.14	0.1	0	2.07	0.94	1.69	0.13	0	12.92	0.324	1.56	0.14	0	25.83	\N	\N	0.1	1973-10-20 00:00:00	杨小春	510702197310205021
0	560	2	3	3	103309110062	513224198203090597	1	31	2	2	1	2	1	3	1	2	1	1	170.0	77.1	98.0	26.6782	142	94	244	0.3	95.37	197.94	8.44	9.3	8.14	0	0.3	0.326	0.81	8.44	0	95.37	0.328	0.86	9.3	0.03	197.94	\N	\N	8.14	1982-03-09 00:00:00	唐子兵	513224198203090597
0	562	2	3	3	103311030015	510703199309263289	2	20	1	1	1	1	2	3	-1	-1	1	1	158.0	50.6	66.0	20.2692	122	65	7	2.18	1001	12.14	0.13	0.11	6.63	0	2.18	0.339	1.91	0.13	0	1001	0.319	1.81	0.11	0	12.14	\N	\N	6.63	1993-09-26 00:00:00	曹雪梅	510703199309263289
0	563	2	3	3	103311060064	510702197712125024	2	35	2	2	2	1	2	3	-1	-1	1	1	160.0	47.8	66.0	18.6719	118	73	18	19.66	738.3	85.76	2.85	3.05	2.63	0	19.66	0.397	1.49	2.85	0	738.3	0.302	1.42	3.05	0	85.76	\N	\N	2.63	1977-12-12 00:00:00	张桂华	510702197712125024
0	564	2	3	3	103311020075	510703198109073128	2	32	2	2	1	1	1	3	1	1	1	1	165.0	65.0	80.0	23.8751	115	73	8	65.57	1001	443.02	3.11	3.04	2.92	0	65.57	0.345	0.97	3.11	0	1001	0.343	0.75	3.04	0	443.02	\N	\N	2.92	1981-09-07 00:00:00	谢蓉	510703198109073128
0	566	2	3	3	103311020074	510702197711275426	2	35	2	2	2	1	1	3	1	1	1	1	158.0	52.0	76.0	20.83	114	72	20	3.82	0.4	12.14	10.24	0.02	6.63	0.04	3.82	1.002	0.04	10.24	0	0.4	0.309	0.02	0.02	0	12.14	\N	\N	6.63	1977-11-27 00:00:00	谢东珍	510702197711275426
0	567	2	3	3	103309200100	510703198704183129	2	26	1	1	1	1	2	3	1	1	1	1	155.0	40.3	67.0	16.7742	104	80	61	0.33	341.49	92.01	0.47	0.15	0.14	0.01	0.33	0.309	1.92	0.47	0	341.49	0.297	1.88	0.15	0	92.01	\N	\N	0.14	1987-04-18 00:00:00	罗燕	510703198704183129
0	568	2	3	3	103311040067	510703198904213118	1	24	1	1	1	1	1	3	-1	-1	1	1	170.0	53.5	73.0	18.5121	141	89	26	27.28	47.9	47.69	8.8	8.79	7.96	0.01	27.28	0.304	0.35	8.8	0	47.9	0.306	0.34	8.79	0	47.69	\N	\N	7.96	1989-04-21 00:00:00	李超	510703198904213118
0	570	2	3	3	103309200095	510723198408163209	2	29	1	1	1	1	1	3	1	1	1	1	146.0	47.8	70.0	22.4245	127	87	22	1.53	388.96	697.99	0.12	0.1	0.18	0.01	1.53	0.361	1.56	0.12	0	388.96	0.298	1.88	0.1	0.02	697.99	\N	\N	0.18	1984-08-16 00:00:00	梁小琼	510723198408163209
0	571	2	3	3	103308080052	51062219791103722X	2	33	2	2	1	1	1	3	1	1	1	1	157.0	52.7	72.0	21.3802	131	79	18	0	53.09	1.78	1.69	0.12	0.15	-2	0	\N	\N	1.69	0	53.09	0.336	1.86	0.12	0	1.78	\N	\N	0.15	1979-11-03 00:00:00	景红英	51062219791103722X
0	572	2	3	3	103309240118	510703199011183112	1	22	1	1	1	1	2	3	-1	-1	1	1	170.0	58.4	74.0	20.2076	112	70	55	0.33	119.39	238.79	0.15	0.15	1.79	0.01	0.33	0.353	1.94	0.15	0	119.39	0.343	1.7	0.15	0	238.79	\N	\N	1.79	1990-11-18 00:00:00	赵东	510703199011183112
0	576	2	3	3	103312200013	510703199503073120	2	18	1	1	1	1	1	3	1	1	1	1	162.0	64.7	76.0	24.6533	124	64	13	0	1001	289.64	1.97	0.11	3.08	0.02	0	\N	\N	1.97	0	1001	0.336	1.87	0.11	0	289.64	\N	\N	3.08	1995-03-07 00:00:00	贺槿煊	510703199503073120
0	577	2	3	3	103310240043	510703199201253126	2	21	1	1	1	1	1	3	1	2	1	1	145.0	49.4	74.0	23.4958	119	70	8	28.17	1001	415.83	0.88	1.03	1.92	0.04	28.17	0.337	1.63	0.88	0	1001	0.32	1.61	1.03	0	415.83	\N	\N	1.92	1992-01-25 00:00:00	米娟	510703199201253126
3	578	2	3	2	103309130010	510703198709283129	2	25	1	1	1	1	1	3	1	1	1	1	160.0	78.4	94.0	30.625	116	65	22	0.27	\N	6.79	0.16	\N	0.11	0	0.27	0.342	1.86	0.16	\N	\N	\N	\N	\N	0	6.79	\N	\N	0.11	1987-09-28 00:00:00	赵美美	510703198709283129
0	580	2	3	2	103308280078	510703198108013123	2	32	2	2	1	1	2	3	1	1	1	1	145.0	47.5	72.0	22.5922	105	76	23	99.44	\N	1001	6.61	\N	5.84	0	99.44	0.325	1.5	6.61	\N	\N	\N	\N	\N	0	1001	\N	\N	5.84	1981-08-01 00:00:00	赖桂红	510703198108013123
0	582	2	3	3	103310060010	510723197911043904	2	33	2	2	1	1	1	3	1	1	1	1	158.0	50.6	66.0	20.2692	129	96	22	3.2	244.24	959.92	8.33	8.49	7.31	0	3.2	0.336	1.48	8.33	0	244.24	0.307	1.49	8.49	0.04	959.92	\N	\N	7.31	1979-11-04 00:00:00	顾萍	510723197911043904
0	583	2	3	3	103309060057	510703199710203119	1	15	1	1	1	1	2	3	2	2	1	1	168.0	53.0	62.0	18.7783	110	65	14	3.1	503.2	100.78	0.09	0.12	0.13	0	3.1	0.331	1.85	0.09	0	503.2	0.33	1.8	0.12	0	100.78	\N	\N	0.13	1997-10-20 00:00:00	郭兴红	510703199710203119
0	584	2	3	2	103310060014	510703198708143116	1	26	1	1	1	1	2	3	-1	-1	1	1	164.0	73.6	86.0	27.3647	123	84	144	0	\N	0.97	0.08	\N	0.13	0	0	1.086	1.51	0.08	\N	\N	\N	\N	\N	0	0.97	\N	\N	0.13	1987-08-14 00:00:00	谢兴亮	510703198708143116
3	585	2	3	3	103309130013	510722198706231664	2	26	1	1	1	1	1	3	-1	-1	1	1	156.0	64.2	86.0	26.3807	112	59	23	179.8	1001	9.7	9.43	9.53	8.4	0	179.8	0.378	0.13	9.43	0	1001	0.332	0.09	9.53	0	9.7	\N	\N	8.4	1987-06-23 00:00:00	王丽	510722198706231664
0	589	2	3	3	103311090016	510703199110083117	1	22	1	1	1	1	1	3	-1	-1	1	1	168.0	62.2	80.0	22.038	153	88	105	0.47	42.91	5.46	0.09	0.1	0.09	0	0.47	0.334	2.02	0.09	0	42.91	0.32	1.88	0.1	0	5.46	\N	\N	0.09	1991-10-08 00:00:00	唐杰明	510703199110083117
3	590	2	3	2	103310150017	510703199509103116	1	18	1	1	1	1	1	3	-1	-1	1	1	170.0	65.1	72.0	22.526	132	77	9	19.34	\N	72.47	0.05	\N	0.04	0	19.34	0.328	1.95	0.05	\N	\N	\N	\N	\N	0	72.47	\N	\N	0.04	1995-09-10 00:00:00	赖骏	510703199509103116
0	591	2	3	3	103309270035	510725197509140522	2	38	2	2	2	1	1	3	1	1	1	1	158.0	49.5	82.0	19.8286	155	86	12	52.73	1001	742.13	0.51	0.57	0.54	0	52.73	0.317	1.46	0.51	0	1001	0.338	1.39	0.57	0	742.13	\N	\N	0.54	1975-09-14 00:00:00	黄毕华	510725197509140522
0	592	2	3	3	103309200064	51070319840225311X	1	29	1	1	1	1	1	3	1	1	1	1	175.0	55.5	74.0	18.1224	111	78	19	138.89	162.2	197.66	1.14	1.29	1.03	0.01	138.89	0.328	1.55	1.14	0	162.2	0.309	1.43	1.29	0	197.66	\N	\N	1.03	1984-02-25 00:00:00	王勇	51070319840225311X
3	593	2	3	3	103311100038	510623198802029045	2	25	1	1	1	1	1	3	-1	-1	1	1	150.0	46.2	73.0	20.5333	130	90	23	825.76	1001	1001	7.05	7.95	6.68	0	825.76	0.335	0.49	7.05	0	1001	0.373	0.25	7.95	0	1001	\N	\N	6.68	1988-02-02 00:00:00	李欣彤	510623198802029045
0	594	2	3	3	103309180017	510823198012015686	2	32	2	2	1	1	1	3	1	1	1	1	162.0	56.4	80.0	21.4906	111	72	37	0	41.86	231.62	0.13	0.1	0.42	0	0	0.317	1.93	0.13	0	41.86	0.315	1.79	0.1	0.02	231.62	\N	\N	0.42	1980-12-01 00:00:00	梁翠平	510823198012015686
0	595	2	3	3	103312240015	510703199107083116	1	22	1	1	1	1	1	3	2	1	1	1	165.0	63.1	70.0	23.1772	123	78	27	1.28	525.24	32.26	0.19	0.08	0.15	0	1.28	0.295	1.79	0.19	0.01	525.24	0.343	1.68	0.08	0	32.26	\N	\N	0.15	1991-07-08 00:00:00	唐敏	510703199107083116
0	596	2	3	3	103401210017	510703198408223122	2	29	1	1	1	1	1	3	1	1	1	1	164.0	56.5	72.0	21.0068	114	65	14	93.45	196	146.47	3.78	3.98	3.26	0	93.45	0.291	1.42	3.78	0	196	0.325	1.5	3.98	0	146.47	\N	\N	3.26	1984-08-22 00:00:00	黄蓉	510703198408223122
0	598	2	3	3	103308070014	510703198106223127	2	32	2	2	1	1	3	3	-1	-1	1	1	154.0	43.1	64.0	18.1734	105	64	28	0.2	499.12	12.66	0.09	8.15	0.11	0	0.2	0.35	1.64	0.09	0	499.12	0.385	0.47	8.15	0.01	12.66	\N	\N	0.11	1981-06-22 00:00:00	曾红梅	510703198106223127
3	599	2	3	2	103311130013	510703198607023123	2	27	1	1	1	1	1	3	1	1	1	1	160.0	72.0	90.0	28.125	133	69	22	0	\N	1001	0.005	\N	7.95	-2	0	\N	\N	0.005	\N	\N	\N	\N	\N	0	1001	\N	\N	7.95	1986-07-02 00:00:00	舒娟	510703198607023123
0	600	2	3	3	103309090012	510703198601112846	2	27	1	1	1	1	1	3	1	1	1	1	156.0	62.8	80.0	25.8054	104	50	47	83.99	945.64	0.7	5.04	4.72	1.46	0	83.99	0.317	1.54	5.04	0	945.64	0.321	1.42	4.72	0	0.7	\N	\N	1.46	1986-01-11 00:00:00	肖红英	510703198601112846
0	601	2	3	3	103309090011	510703198209223111	1	30	2	2	1	1	1	3	2	1	1	1	168.0	52.9	63.0	18.7429	124	55	19	12.23	684.96	167.31	1.97	1.9	2.47	0	12.23	0.346	0.34	1.97	0	684.96	0.322	1.56	1.9	0	167.31	\N	\N	2.47	1982-09-22 00:00:00	郭伟	510703198209223111
0	604	2	3	3	103310210025	510703198101153123	2	32	2	2	1	1	1	3	-1	-1	1	1	154.0	46.8	72.0	19.7335	123	75	21	0	41.7	10.88	0.23	0.1	0.11	0	0	0.298	1.78	0.23	0	41.7	0.36	1.91	0.1	0	10.88	\N	\N	0.11	1981-01-15 00:00:00	谢红英	510703198101153123
0	605	2	3	3	103309160110	510626198504134428	2	28	1	1	1	1	1	3	1	1	1	1	161.0	62.0	74.0	23.9188	115	71	17	1.24	102.49	220.28	0.07	0.08	0.09	0.01	1.24	0.301	2.05	0.07	0	102.49	0.329	1.85	0.08	0	220.28	\N	\N	0.09	1985-04-13 00:00:00	米翠	510626198504134428
0	606	2	3	3	103308270005	510722198210194249	2	30	2	2	1	1	1	3	1	1	1	1	165.0	58.1	77.0	21.3407	104	61	24	22.14	4.5	127.3	4.17	0.78	4.4	0	22.14	0.315	1.52	4.17	3.13	4.5	7.514	0	0.78	0	127.3	\N	\N	4.4	1982-10-19 00:00:00	谢金梅	510722198210194249
0	608	2	3	3	103308030091	510703199702103126	2	16	1	1	1	1	3	3	1	1	1	1	168.0	59.6	81.0	21.1168	113	57	27	0	114.06	13.41	0.19	0.11	0.15	0	0	0.347	1.93	0.19	0	114.06	0.343	1.76	0.11	0	13.41	\N	\N	0.15	1997-02-10 00:00:00	李媛	510703199702103126
0	610	2	3	3	103310260046	511321198106296782	2	32	2	2	1	1	1	3	-1	-1	1	1	162.0	57.6	78.0	21.9479	111	70	11	4.07	1001	52.91	0.14	0.19	0.18	0	4.07	0.299	1.56	0.14	0	1001	0.308	1.44	0.19	0	52.91	\N	\N	0.18	1981-06-29 00:00:00	赵彩霞	511321198106296782
0	613	2	3	3	103309200031	510703199612203123	2	16	1	1	1	1	1	3	1	1	1	1	156.0	47.1	64.0	19.354	114	87	15	3	61.39	4.54	1.8	0.11	8.07	0.02	3	\N	\N	1.8	0	61.39	0.34	1.59	0.11	0	4.54	\N	\N	8.07	1996-12-20 00:00:00	白冰雪	510703199612203123
0	615	2	3	3	103308300007	510703198109083115	1	31	2	2	1	1	1	3	1	1	1	1	165.0	59.4	79.0	21.8182	117	68	34	0	102.89	1001	1.78	0.11	0.16	0.02	0	\N	\N	1.78	0	102.89	0.333	1.98	0.11	0	1001	\N	\N	0.16	1981-09-08 00:00:00	向能全	510703198109083115
0	617	2	3	1	103309300061	510703198404203124	2	29	1	1	1	1	1	3	1	1	1	1	160.0	62.9	82.0	24.5703	109	69	20	0	22.4	\N	0.005	8.64	\N	0.03	0	\N	\N	0.005	0	22.4	0.31	0.51	8.64	\N	\N	\N	\N	\N	1984-04-20 00:00:00	李晓琼	510703198404203124
3	619	2	3	3	103311070055	510703199208243123	2	21	1	1	1	1	1	3	1	1	1	1	160.0	68.0	78.0	26.5625	124	63	31	91.16	1001	401.81	0.2	0.21	0.1	0	91.16	0.307	1.78	0.2	0	1001	0.32	1.89	0.21	0	401.81	\N	\N	0.1	1992-08-24 00:00:00	陈潇潇	510703199208243123
0	621	2	3	3	103309160062	510703199209183118	1	20	1	1	1	1	2	3	2	1	1	1	172.0	63.4	74.0	21.4305	112	72	58	25.33	490.53	261.77	0.36	0.05	0.16	0	25.33	0.312	1.82	0.36	0	490.53	0.322	1.73	0.05	0	261.77	\N	\N	0.16	1992-09-18 00:00:00	李强	510703199209183118
0	629	2	3	3	103310040023	510703199306263144	2	20	1	1	1	1	2	3	-1	-1	1	1	155.0	37.5	60.0	15.6087	110	79	26	0	23.21	390.91	1.9	0.11	4.44	0.01	0	\N	\N	1.9	0	23.21	0.382	1.84	0.11	0	390.91	\N	\N	4.44	1993-06-26 00:00:00	邓雪梅	510703199306263144
0	630	2	3	3	103311020034	510703199203243132	1	21	1	1	1	1	1	3	-1	-1	1	1	175.0	54.6	64.0	17.8286	148	88	37	280.9	1001	352.61	0.005	9.43	8.73	-2	280.9	\N	\N	0.005	0	1001	0.322	0.42	9.43	0	352.61	\N	\N	8.73	1992-03-24 00:00:00	吴强	510703199203243132
0	633	2	3	3	103401240007	510703199703253126	2	16	1	1	1	1	1	3	-1	-1	1	1	152.0	60.3	80.0	26.0994	126	66	138	0	17.75	0.55	1.96	0.12	0.09	0.01	0	\N	\N	1.96	0	17.75	0.343	1.76	0.12	0	0.55	\N	\N	0.09	1997-03-25 00:00:00	李春琼	510703199703253126
0	635	2	3	3	103310280037	510703199601143129	2	17	1	1	1	1	2	3	1	1	1	1	165.0	59.2	76.0	21.7447	117	72	15	28.2	1001	19.32	1.87	0.07	0.07	0.02	28.2	\N	\N	1.87	0	1001	0.341	1.79	0.07	0.04	19.32	0.396	\N	0.07	1996-01-14 00:00:00	谢丽	510703199601143129
0	636	2	3	3	103311100012	510703199408013146	2	19	1	1	1	1	1	3	-1	-1	1	1	165.0	54.7	70.0	20.0918	100	60	10	140.3	176.66	10.83	0.005	9.1	7.55	0.03	140.3	\N	\N	0.005	0.02	176.66	0.246	0.95	9.1	0	10.83	\N	\N	7.55	1994-08-01 00:00:00	邓阳炀	510703199408013146
3	637	2	3	3	103311100036	510703199703213124	2	16	1	1	1	1	1	3	-1	-1	1	1	160.0	44.3	68.0	17.3047	121	62	8	296.6	1001	486.34	0.005	8.98	8.17	0.02	296.6	\N	\N	0.005	0	1001	0.36	0.02	8.98	0	486.34	\N	\N	8.17	1997-03-21 00:00:00	刘芳	510703199703213124
0	639	2	3	3	103308070068	510703199701303118	1	16	1	1	1	1	2	3	-1	-1	1	1	182.0	51.1	63.0	15.4269	135	83	15	0	229.99	25.48	1.94	0.21	0.11	0.02	0	\N	\N	1.94	0	229.99	0.314	1.83	0.21	0	25.48	\N	\N	0.11	1997-01-30 00:00:00	吴龙	510703199701303118
0	640	2	3	3	103401210006	510703199412053124	2	19	1	1	1	1	1	3	1	1	1	1	150.0	43.2	68.0	19.2	114	70	37	0.05	32.28	22.41	0.12	0.11	0.13	0	0.05	0.321	1.63	0.12	0	32.28	0.287	1.74	0.11	0	22.41	\N	\N	0.13	1994-12-05 00:00:00	李潼淋	510703199412053124
0	646	2	3	2	103309260006	510703199505259658	1	18	1	1	1	1	1	3	1	1	1	1	168.0	60.1	70.0	21.2939	140	70	13	12.04	\N	533.59	0.36	\N	0.08	0	12.04	0.296	1.68	0.36	\N	\N	\N	\N	\N	0	533.59	\N	\N	0.08	1995-05-25 00:00:00	王金龙	510703199505259658
0	649	2	3	3	103311040090	51070319931223311X	1	19	1	1	1	1	2	3	1	1	1	1	170.0	56.5	73.0	19.5502	115	65	8	0	60.58	187.8	0.05	0.07	4.91	0	0	0.24	1.82	0.05	0	60.58	0.336	1.82	0.07	0	187.8	\N	\N	4.91	1993-12-23 00:00:00	周俊	51070319931223311X
2	650	2	3	3	103310260040	510703200002163123	2	13	0	0	0	1	1	3	-1	-1	1	1	160.0	49.2	70.0	19.2187	110	75	12	13.5	1001	38.48	0.07	0.09	7.87	0	13.5	0.226	1.7	0.07	0	1001	0.312	2	0.09	0	38.48	\N	\N	7.87	2000-02-16 00:00:00	肖诺岚	510703200002163123
0	652	1	3	1	106311100031	510704198412283116	1	28	1	1	1	1	2	3	-1	-1	1	1	165.0	62.0	76.0	22.7732	118	80	52	12.87	1001	\N	0.13	0.1	\N	0.04	12.87	1.001	1.45	0.13	0	1001	0.324	1.84	0.1	\N	\N	\N	\N	\N	1984-12-28 00:00:00	兰义兵	510704198412283116
0	653	1	3	1	106307180011	510781199002260840	2	23	1	1	1	1	3	1	-1	-1	1	1	157.0	43.0	69.0	17.4449	100	66	12	0.14	64.55	\N	0.11	3.72	\N	0	0.14	0.32	1.83	0.11	0	64.55	0.322	1.48	3.72	\N	\N	\N	\N	\N	1990-02-26 00:00:00	周俊芳	510781199002260840
0	654	1	3	1	106307190060	320681198910087216	1	23	1	1	1	1	3	1	-1	-1	1	1	177.0	72.0	89.0	22.9819	116	72	80	0	1001	\N	0.031	3.27	\N	0.01	0	\N	\N	0.031	0	1001	0.319	1.12	3.27	\N	\N	\N	\N	\N	1989-10-08 00:00:00	顾赛华	320681198910087216
0	655	1	3	3	106310110033	510703198401202417	1	29	1	1	1	1	3	1	-1	-1	1	1	183.0	85.0	94.0	25.3815	130	76	41	0.01	119.5	6.15	0.22	0.23	0.27	0	0.01	0.331	1.85	0.22	0	119.5	0.344	1.95	0.23	0.03	6.15	\N	\N	0.27	1984-01-20 00:00:00	刘敏	510703198401202417
0	656	1	3	3	106310110062	51070319790206242X	2	34	2	2	1	1	2	1	1	1	1	1	160.0	55.0	70.0	21.4844	100	60	10	70.88	165.36	171.25	8.96	9.23	8.51	0	70.88	0.4	0.21	8.96	0	165.36	0.337	0.21	9.23	0	171.25	\N	\N	8.51	1979-02-06 00:00:00	兰容	51070319790206242X
0	657	1	3	3	106310110059	51070219550320312X	2	58	3	3	3	1	1	1	1	1	1	1	155.0	65.0	87.0	27.0552	124	86	13	15.71	309.77	109.11	0.51	0.52	0.87	0	15.71	0.322	1.61	0.51	0	309.77	0.314	1.74	0.52	0	109.11	\N	\N	0.87	1955-03-20 00:00:00	张玉芳	51070219550320312X
0	658	1	3	2	106310120002	510702195406253117	1	59	3	3	3	1	2	1	1	1	1	1	160.0	60.0	76.0	23.4375	135	70	32	0.18	\N	2.18	0.08	\N	0.12	0	0.18	0.328	1.98	0.08	\N	\N	\N	\N	\N	0	2.18	\N	\N	0.12	1954-06-25 00:00:00	刘太兴	510702195406253117
0	659	1	3	3	106310110037	510702195602103124	2	57	3	3	3	1	1	1	1	1	1	1	158.0	52.0	70.0	20.83	142	80	16	31.19	53.77	45.73	4.23	4.32	5.36	0	31.19	0.313	0.33	4.23	0	53.77	0.3	0.36	4.32	0	45.73	\N	\N	5.36	1956-02-10 00:00:00	王芳秀	510702195602103124
0	660	1	3	2	106311090001	510702197104183116	1	42	2	2	2	1	3	1	2	2	1	1	170.0	89.0	92.0	30.7958	142	90	25	6.38	\N	12.04	8.02	\N	7.66	0	6.38	0.319	0.68	8.02	\N	\N	\N	\N	\N	0	12.04	\N	\N	7.66	1971-04-18 00:00:00	曹国	510702197104183116
0	661	1	3	2	106310110077	510702195909163121	2	54	3	3	3	1	1	3	1	1	1	1	157.0	80.0	92.0	32.4557	124	82	20	1.27	\N	15.3	5.6	\N	6.7	0	1.27	0.302	1.29	5.6	\N	\N	\N	\N	\N	0	15.3	\N	\N	6.7	1959-09-16 00:00:00	陈再秀	510702195909163121
0	662	1	3	3	106310170047	510702196205153149	2	51	3	3	3	1	1	1	1	1	1	1	145.0	55.0	77.0	26.1593	120	70	55	54.51	74.91	28.39	5.32	8.56	4.99	0	54.51	0.328	1.48	5.32	0	74.91	0.31	1.36	8.56	0	28.39	\N	\N	4.99	1962-05-15 00:00:00	田相琴	510702196205153149
0	663	1	3	3	106310120084	510702197101073130	1	42	2	2	2	1	2	1	2	3	1	1	162.0	66.0	80.0	25.1486	108	64	20	3.27	1001	16.27	9.47	0.08	6.96	0	3.27	0.339	0.43	9.47	0	1001	0.327	1.84	0.08	0	16.27	\N	\N	6.96	1971-01-07 00:00:00	蒋传林	510702197101073130
0	664	1	3	3	106310120103	510721196810056362	2	45	2	3	2	1	1	3	-1	-1	1	1	155.0	53.0	68.0	22.0604	114	60	11	3.9	1001	1001	0.056	3.2	3.12	0.03	3.9	\N	\N	0.056	0	1001	0.316	1.59	3.2	0	1001	\N	\N	3.12	1968-10-05 00:00:00	吴桂容	510721196810056362
0	665	1	3	3	106310100148	51070219631120312X	2	49	2	3	2	1	3	1	1	1	1	1	166.0	63.0	76.0	22.8625	118	78	12	9.67	24.92	17.64	9.22	8.8	9.08	0	9.67	0.348	0.65	9.22	0	24.92	0.326	0.74	8.8	0	17.64	\N	\N	9.08	1963-11-20 00:00:00	蒋胜蓉	51070219631120312X
0	666	1	3	3	106310100145	519002197303230704	2	40	2	2	2	1	3	1	1	2	1	1	160.0	59.0	74.0	23.0469	122	62	13	18.86	1001	405.81	0.27	0.16	0.18	0	18.86	0.351	1.88	0.27	0.01	1001	0.426	1.71	0.16	0	405.81	\N	\N	0.18	1973-03-23 00:00:00	魏桂华	519002197303230704
0	667	1	3	3	106310110036	510702196303023129	2	50	3	3	3	1	3	3	-1	-1	2	2	155.0	80.0	100.0	33.2986	186	86	19	0	108.8	12.16	0.012	4.61	5.82	0.03	0	\N	\N	0.012	0	108.8	0.335	1.4	4.61	0	12.16	\N	\N	5.82	1963-03-02 00:00:00	魏加瑛	510702196303023129
0	668	1	3	3	106310090059	510702197305103119	1	40	2	2	2	1	1	1	1	2	1	1	170.0	80.0	88.0	27.6817	110	70	40	3.18	10.25	20.29	6.78	6.74	6.91	0	3.18	0.374	1.44	6.78	0	10.25	0.396	1.31	6.74	0	20.29	\N	\N	6.91	1973-05-10 00:00:00	李建国	510702197305103119
0	669	1	3	1	106310120108	510702197207163134	1	41	2	2	2	1	3	3	2	3	1	1	165.0	60.0	67.0	22.0386	146	94	14	40.1	357.5	\N	8.88	7.81	\N	0	40.1	0.318	1.17	8.88	0.02	357.5	0.352	1.13	7.81	\N	\N	\N	\N	\N	1972-07-16 00:00:00	李贤伟	510702197207163134
0	670	1	3	3	106310090100	510721197005130464	2	43	2	2	2	1	1	3	1	1	1	1	155.0	68.0	93.0	28.3039	94	62	47	0.43	28.86	1.14	0.12	0.18	0.13	0	0.43	0.323	1.73	0.12	0.07	28.86	0.624	1.62	0.18	0.04	1.14	\N	\N	0.13	1970-05-13 00:00:00	高长秀	510721197005130464
0	671	1	3	3	106310110063	510702195405123126	2	59	3	3	3	1	1	1	1	1	1	1	160.0	65.0	84.0	25.3906	160	76	32	4.15	46.5	9.13	2.19	2.32	2.73	0	4.15	0.355	1.28	2.19	0.01	46.5	0.304	1.11	2.32	0	9.13	\N	\N	2.73	1954-05-12 00:00:00	曹玉琼	510702195405123126
0	672	1	3	2	106310110122	510702195405213121	2	59	3	3	3	1	1	1	1	1	1	1	147.0	35.0	50.0	16.197	120	70	27	0.93	\N	113.55	9.21	\N	8.78	0	0.93	0.348	1.29	9.21	\N	\N	\N	\N	\N	0	113.55	\N	\N	8.78	1954-05-21 00:00:00	张启秀	510702195405213121
0	673	1	3	3	106310140145	510702196903193113	1	44	2	2	2	1	3	1	1	3	1	1	166.0	62.0	72.0	22.4996	120	72	33	1.01	275.34	1001	0.07	0.1	0.1	0	1.01	0.333	0.03	0.07	0	275.34	0.46	1.75	0.1	0	1001	\N	\N	0.1	1969-03-19 00:00:00	苏韩斌	510702196903193113
0	674	1	3	2	106310140144	51072119710212084X	2	42	2	2	2	1	3	3	1	1	1	1	150.0	58.0	82.0	25.7778	132	80	17	9.38	\N	444.65	0.24	\N	0.54	0	9.38	0.321	0.74	0.24	\N	\N	\N	\N	\N	0	444.65	\N	\N	0.54	1971-02-12 00:00:00	葛春蓉	51072119710212084X
0	676	1	3	3	106310110066	510702196602113140	2	47	2	3	2	1	1	1	1	1	1	1	157.0	69.0	80.0	27.993	122	72	21	6.4	1001	12.73	4.13	1.71	4.67	0	6.4	0.338	1.27	4.13	0	1001	0.31	1.62	1.71	0	12.73	\N	\N	4.67	1966-02-11 00:00:00	刘太玉	510702196602113140
0	677	1	3	3	106310130109	510702196611283141	2	46	2	3	2	1	2	1	-1	-1	1	1	160.0	51.0	68.0	19.9219	120	64	12	5.05	1.73	22.25	6.15	10.23	8.11	0.03	5.05	0.449	0.03	6.15	17.54	1.73	0.318	0.03	10.23	0	22.25	\N	\N	8.11	1966-11-28 00:00:00	薛永芬	510702196611283141
0	678	1	3	3	106310140122	510703198102132447	2	32	2	2	1	1	1	1	-1	-1	1	1	157.0	49.0	65.0	19.8791	98	64	11	3.18	0	10.29	0.08	0.09	0.13	0	3.18	0.309	0.07	0.08	0	0	0.323	1.77	0.09	0	10.29	\N	\N	0.13	1981-02-13 00:00:00	刘小玲	510703198102132447
0	679	1	3	3	106310140123	51072319771210513X	1	35	2	2	2	1	1	3	-1	-1	1	1	166.0	60.0	71.0	21.7738	116	64	17	43.63	404.7	166.14	3.75	4.32	4.86	0	43.63	0.317	0.82	3.75	0	404.7	0.331	1.18	4.32	0	166.14	\N	\N	4.86	1977-12-10 00:00:00	毛星原	51072319771210513X
0	680	1	3	3	106310090147	510702196805073118	1	45	2	3	2	1	3	1	1	1	1	1	157.0	65.0	83.0	26.3702	124	76	21	10.68	323.23	58.1	1.76	1.97	2.13	0.02	10.68	0.488	105	1.76	0	323.23	0.303	1.211	1.97	0	58.1	\N	\N	2.13	1968-05-07 00:00:00	曹华才	510702196805073118
0	681	1	3	1	106310100123	510626198603013904	2	27	1	1	1	1	3	1	1	1	1	1	160.0	65.0	80.0	25.3906	114	76	23	3.71	667.9	\N	0.14	0.11	\N	0	3.71	0.343	0.03	0.14	0	667.9	0.333	1.61	0.11	\N	\N	\N	\N	\N	1986-03-01 00:00:00	黄小莉	510626198603013904
0	684	1	3	3	106310090152	510721197204200701	2	41	2	2	2	1	3	1	1	1	1	1	152.0	51.0	70.0	22.0741	94	62	6	11.29	31.9	7.63	3.82	4.78	5.44	0	11.29	0.377	0.84	3.82	0	31.9	0.377	1.02	4.78	0.02	7.63	\N	\N	5.44	1972-04-20 00:00:00	江晓蓉	510721197204200701
0	686	1	3	3	106310140049	510702197404133110	1	39	2	2	2	1	2	1	1	1	1	1	175.0	70.0	77.0	22.8571	122	70	43	12.43	7.08	961.08	5.91	4.76	5.71	0	12.43	0.33	1.35	5.91	0	7.08	0.292	0.37	4.76	0	961.08	\N	\N	5.71	1974-04-13 00:00:00	陈明	510702197404133110
0	687	1	3	1	106310120012	510702197303073112	1	40	2	2	2	1	1	3	1	2	1	1	170.0	58.0	72.0	20.0692	118	70	32	6.74	67.75	\N	8.05	8.49	\N	0	6.74	0.348	1.53	8.05	0	67.75	0.285	1.57	8.49	\N	\N	\N	\N	\N	1973-03-07 00:00:00	向明	510702197303073112
0	688	1	3	3	106310100151	510702197102113130	1	42	2	2	2	1	1	1	2	2	1	1	163.0	70.0	86.0	26.3465	120	72	78	18.44	340.112	160.59	4.57	4.65	4.9	0	18.44	0.324	0.97	4.57	0	340.112	0.349	0.81	4.65	0	160.59	\N	\N	4.9	1971-02-11 00:00:00	曾庆友	510702197102113130
0	689	1	3	3	106310140077	510702196410223118	1	48	2	3	2	1	1	3	2	2	1	1	165.0	75.0	92.0	27.5482	138	80	79	1.55	53.47	128.77	3.68	3.28	3.74	0	1.55	0.341	1.53	3.68	0	53.47	0.339	1.51	3.28	0	128.77	\N	\N	3.74	1964-10-22 00:00:00	邹坤金	510702196410223118
0	690	1	3	3	106310120060	510702195807283114	1	55	3	3	3	1	2	3	1	2	1	1	155.0	45.0	59.0	18.7305	126	74	15	5.41	178.1	6.53	0.25	0.24	0.25	0	5.41	0.331	1.79	0.25	0	178.1	0.315	1.74	0.24	0.02	6.53	\N	\N	0.25	1958-07-28 00:00:00	晏天国	510702195807283114
0	691	1	3	3	106310120057	510702196405233127	2	49	2	3	2	1	1	3	1	1	1	1	143.0	58.0	82.0	28.3632	136	80	53	17.56	1001	467.58	1.99	0.11	2.16	0	17.56	0.352	1.59	1.99	0	1001	0.314	1.84	0.11	0	467.58	\N	\N	2.16	1964-05-23 00:00:00	李志琼	510702196405233127
0	692	1	3	1	106310120122	510702196111113111	1	51	3	3	3	1	2	3	1	1	1	1	168.0	77.0	88.0	27.2817	124	94	41	470.05	1001	\N	3.57	3.95	\N	0	470.05	0.325	0.79	3.57	0	1001	0.339	0.74	3.95	\N	\N	\N	\N	\N	1961-11-11 00:00:00	罗长清	510702196111113111
0	693	1	3	1	106310130017	510702196311093119	1	49	2	3	2	1	1	3	2	3	1	1	157.0	65.0	84.0	26.3702	134	80	73	0.34	4.17	\N	8.69	8.97	\N	0	0.34	0.331	1.23	8.69	0	4.17	0.334	1.43	8.97	\N	\N	\N	\N	\N	1963-11-09 00:00:00	李孝元	510702196311093119
0	694	1	3	1	106310130020	510702196108223117	1	52	3	3	3	1	1	3	1	1	1	1	157.0	51.0	7.0	20.6905	116	66	28	2.99	586	\N	9.52	9.27	\N	0	2.99	0.318	0.11	9.52	0	586	0.309	0.12	9.27	\N	\N	\N	\N	\N	1961-08-22 00:00:00	李孝前	510702196108223117
0	696	1	3	1	106310130016	510702196608123120	2	47	2	3	2	1	3	3	1	1	1	1	157.0	60.0	82.0	24.3418	120	74	18	0.03	5.77	\N	0.12	0.15	\N	0	0.03	0.344	0.175	0.12	0	5.77	0.34	1.59	0.15	\N	\N	\N	\N	\N	1966-08-12 00:00:00	钟定蓉	510702196608123120
0	697	1	3	3	106310120086	510702195709043125	2	56	3	3	3	1	2	1	1	1	1	1	150.0	70.0	87.0	31.1111	114	68	27	27.21	459.75	160.14	1.12	1.62	2.48	0	27.21	0.357	1.41	1.12	0	459.75	0.324	1.34	1.62	0	160.14	\N	\N	2.48	1957-09-04 00:00:00	兰昆伦	510702195709043125
0	698	1	3	3	106310090074	519002197401140729	2	39	2	2	2	1	1	1	1	1	1	1	170.0	52.0	67.0	17.9931	128	80	16	7.3	1001	47.38	9.53	9.59	8.79	0	7.3	0.339	1.25	9.53	0	1001	0.319	1.38	9.59	0.01	47.38	\N	\N	8.79	1974-01-14 00:00:00	邓玉华	519002197401140729
0	699	1	3	1	106310120118	510702197505193139	1	38	2	2	2	1	2	3	1	1	1	1	160.0	63.0	82.0	24.6094	126	86	30	120.72	622.1	\N	5.1	4.9	\N	0	120.72	0.321	1.58	5.1	0	622.1	0.343	1.41	4.9	\N	\N	\N	\N	\N	1975-05-19 00:00:00	张云	510702197505193139
0	700	1	3	3	106310150069	510702195502073124	2	58	3	3	3	1	1	3	1	3	1	1	155.0	45.0	60.0	18.7305	122	76	21	1.8	121.44	22.42	5.94	6.03	6.99	0	1.8	0.316	1.56	5.94	0	121.44	0.316	1.47	6.03	0	22.42	\N	\N	6.99	1955-02-07 00:00:00	刘成文	510702195502073124
0	701	1	3	3	106307200006	510702196707163128	2	46	2	3	2	1	2	3	1	2	1	1	165.0	62.0	79.0	22.7732	124	76	28	13.92	183.69	37.11	5.01	5.08	8.2	0	13.92	0.318	0.58	5.01	0	183.69	0.303	0.53	5.08	0	37.11	\N	\N	8.2	1967-07-16 00:00:00	兰翔	510702196707163128
0	702	1	3	3	106310130075	510702195812113144	2	54	3	3	3	1	1	1	1	1	1	1	145.0	41.0	58.0	19.5006	120	66	16	57.2	62.54	91.03	0.47	0.5	0.66	0	57.2	0.386	1.49	0.47	0	62.54	0.331	1.65	0.5	0	91.03	\N	\N	0.66	1958-12-11 00:00:00	薛琼芳	510702195812113144
0	703	1	3	3	106311020028	510702196305243125	2	50	3	3	3	1	1	1	1	1	1	1	155.0	60.0	98.0	24.974	126	84	57	0.31	52.37	3.26	6.95	7.04	5.97	0	0.31	0.328	0.64	6.95	0	52.37	0.318	0.58	7.04	0	3.26	0.277	0.51	5.97	1963-05-24 00:00:00	冯天珍	510702196305243125
0	704	1	3	1	106310120008	510702195508053124	2	58	3	3	3	1	3	1	-1	-1	1	1	153.0	52.0	74.0	22.2137	154	90	19	1.73	31.89	\N	9.31	9.35	\N	0.01	1.73	0.334	1.78	9.31	0	31.89	0.318	1.26	9.35	\N	\N	\N	\N	\N	1955-08-05 00:00:00	唐红容	510702195508053124
0	705	1	3	3	106310150009	510702195604263148	2	57	3	3	3	1	1	3	1	1	1	1	150.0	65.0	83.0	28.8889	124	78	20	5.14	26.96	13.13	5.85	9.81	3.34	0	5.14	0.303	0.24	5.85	0	26.96	0.308	1.3	9.81	0	13.13	\N	\N	3.34	1956-04-26 00:00:00	魏秀兰	510702195604263148
0	706	1	3	3	106310140070	510702196711223111	1	45	2	3	2	1	1	1	2	1	1	1	170.0	55.0	73.0	19.0311	112	74	20	7.78	47.41	18.99	2.32	1.94	3.16	0	7.78	0.57	0.88	2.32	0.02	47.41	0.65	1.3	1.94	0	18.99	\N	\N	3.16	1967-11-22 00:00:00	朱玉平	510702196711223111
0	707	1	3	3	106310150050	519002197505150702	2	38	2	2	2	1	1	3	1	1	1	1	163.0	66.0	78.0	24.841	134	94	30	0	55.26	2.53	0.08	0.06	0.14	0	0	0.322	2.01	0.08	0	55.26	0.334	1.73	0.06	0	2.53	\N	\N	0.14	1975-05-15 00:00:00	刘建梅	519002197505150702
0	708	1	3	3	106310140090	51070219620525314X	2	51	3	3	3	1	1	3	1	1	1	1	157.0	53.0	66.0	21.5019	114	80	21	1.82	81.13	12.75	0.41	0.48	0.39	0.02	1.82	0.343	1.65	0.41	0	81.13	0.371	1.54	0.48	0	12.75	\N	\N	0.39	1962-05-25 00:00:00	黄桂英	51070219620525314X
0	709	1	3	3	106310270175	510703198008242420	2	33	2	2	1	1	2	3	1	1	1	1	155.0	51.0	64.0	21.2279	130	94	34	0	135.27	30.29	0.08	0.08	0.08	0	0	0.309	1.69	0.08	0	135.27	0.317	1.92	0.08	0	30.29	\N	\N	0.08	1980-08-24 00:00:00	王辉	510703198008242420
0	710	1	3	3	106310140120	510703199603122428	2	17	1	1	1	1	2	3	-1	-1	1	1	163.0	65.0	74.0	24.4646	120	74	38	1.39	85.73	18.65	0.15	0.06	0.55	0	1.39	0.29	1.8	0.15	0	85.73	0.32	1.8	0.06	0	18.65	\N	\N	0.55	1996-03-12 00:00:00	刘春艳	510703199603122428
0	712	1	3	3	106310150047	510702195504123148	2	58	3	3	3	1	1	1	1	1	1	1	150.0	51.0	76.0	22.6667	128	74	19	6.56	222.44	31.64	0.35	0.28	0.32	0	6.56	0.335	1.77	0.35	0.02	222.44	0.3	1.6	0.28	0	31.64	\N	\N	0.32	1955-04-12 00:00:00	薛玉华	510702195504123148
0	713	1	3	3	106310160022	510702195502093117	1	58	3	3	3	1	3	3	2	2	1	1	153.0	50.0	70.0	21.3593	164	84	17	6.17	31.25	8.16	8.28	8.23	6.89	0.01	6.17	0.318	1.33	8.28	0	31.25	0.336	1.32	8.23	0.02	8.16	\N	\N	6.89	1955-02-09 00:00:00	刘定前	510702195502093117
0	714	1	3	3	106310120005	510702196901163113	1	44	2	2	2	1	1	3	1	1	1	1	167.0	65.0	79.0	23.3067	122	80	20	0	183.42	26	0.09	0.11	0.14	0	0	0.326	1.77	0.09	0.02	183.42	0.349	1.64	0.11	0	26	\N	\N	0.14	1969-01-16 00:00:00	李孝平	510702196901163113
0	717	1	3	3	106310120059	510702196805273128	2	45	2	3	2	1	1	1	1	1	1	1	158.0	52.0	71.0	20.83	166	112	13	4.83	38.01	16.61	8.81	9.65	8.4	0	4.83	0.369	0.66	8.81	0	38.01	0.336	0.64	9.65	0	16.61	\N	\N	8.4	1968-05-27 00:00:00	吕秀	510702196805273128
0	718	1	3	3	106310150049	510922196709145202	2	46	2	3	2	1	1	3	1	1	1	1	145.0	58.0	84.0	27.5862	138	78	26	0	284.67	50.31	0.17	0.13	0.11	0	0	0.345	1.78	0.17	0	284.67	0.297	1.79	0.13	0	50.31	\N	\N	0.11	1967-09-14 00:00:00	韩应芳	510922196709145202
0	719	1	3	3	106310220136	510702196305053110	1	50	3	3	3	1	3	1	-1	-1	1	1	165.0	61.0	82.0	22.4059	134	66	19	5.01	56.76	15.12	6.95	7.28	7.02	0	5.01	0.375	1.43	6.95	0	56.76	0.33	1.59	7.28	0	15.12	\N	\N	7.02	1963-05-05 00:00:00	刘太春	510702196305053110
0	723	1	3	1	106311050077	510781198506110841	2	28	1	1	1	1	3	1	1	1	1	1	160.0	48.0	60.0	18.75	102	62	21	0	1001	\N	0.15	0.11	\N	0	0	0.306	1.91	0.15	0	1001	0.327	1.91	0.11	\N	\N	\N	\N	\N	1985-06-11 00:00:00	郭莉娟	510781198506110841
0	724	1	3	3	106310120075	510702196908112925	2	44	2	2	2	1	2	3	1	1	1	1	135.0	40.0	64.0	21.9479	128	62	24	43.56	941.88	234.44	0.37	0.21	1.01	0	43.56	0.338	1.83	0.37	0.01	941.88	0.285	1.73	0.21	0	234.44	\N	\N	1.01	1969-08-11 00:00:00	杨菊喜	510702196908112925
0	725	1	3	3	106310130149	510702196806293112	1	45	2	3	2	1	3	3	2	1	1	1	165.0	65.0	85.0	23.8751	106	70	65	8.9	35.19	11.99	8.02	7.66	7.69	0	8.9	0.353	1.32	8.02	0	35.19	0.397	1.21	7.66	0	11.99	\N	\N	7.69	1968-06-29 00:00:00	李孝能	510702196806293112
0	726	1	3	1	106310310090	510702196405183115	1	49	2	3	2	1	3	3	-1	-1	1	1	165.0	78.0	85.0	28.6501	136	90	25	0.9	11.7	\N	1	1.16	\N	0	0.9	0.332	1.86	1	0	11.7	0.298	1.51	1.16	\N	\N	\N	\N	\N	1964-05-18 00:00:00	辛国全	510702196405183115
0	727	1	3	1	106310310087	510702196601023127	2	47	2	3	2	1	3	3	-1	-1	1	1	155.0	61.0	80.0	25.3902	112	70	14	0.08	12.58	\N	0.13	0.13	\N	0	0.08	0.36	1.76	0.13	0	12.58	0.33	1.68	0.13	\N	\N	\N	\N	\N	1966-01-02 00:00:00	黄秀琼	510702196601023127
0	729	1	3	3	106310110032	51070219700428311X	1	43	2	2	2	1	1	3	-1	-1	3	3	168.0	55.0	67.0	19.487	114	78	34	1.14	62.56	117.17	3.2	9.14	2.85	0	1.14	0.331	1.76	3.2	0	62.56	0.326	1.11	9.14	0	117.17	\N	\N	2.85	1970-04-28 00:00:00	邹少奇	51070219700428311X
0	730	1	3	3	106310190139	510722197106032720	2	42	2	2	2	1	1	3	1	2	1	1	164.0	56.0	64.0	20.8209	120	74	16	0.17	32.84	4.9	0.08	0.13	0.12	0	0.17	0.347	1.81	0.08	0	32.84	0.303	1.74	0.13	0	4.9	\N	\N	0.12	1971-06-03 00:00:00	李生琼	510722197106032720
0	731	1	3	3	106310230023	510721197107300831	1	42	2	2	2	1	3	1	1	1	1	1	173.0	77.0	86.0	25.7276	130	78	18	5.98	20.26	46.79	3.4	9.1	8.41	0	5.98	0.364	0.75	3.4	0	20.26	0.321	0.79	9.1	0	46.79	\N	\N	8.41	1971-07-30 00:00:00	高明武	510721197107300831
0	732	1	3	3	106310130082	510702195405093115	1	59	3	3	3	1	1	3	-1	-1	1	1	160.0	60.0	70.0	23.4375	190	85	16	2.29	177.25	11.93	0.15	0.16	0.15	0	2.29	0.343	1.87	0.15	0.02	177.25	0.308	1.61	0.16	0	11.93	\N	\N	0.15	1954-05-09 00:00:00	李伦友	510702195405093115
0	733	1	3	3	106310080036	510702195512233128	2	57	3	3	3	1	3	3	1	1	1	1	155.0	47.0	72.0	19.563	138	70	7	217.09	237.26	149.98	9.14	9.43	9.24	0	217.09	0.332	0.56	9.14	0	237.26	0.338	0.59	9.43	0	149.98	\N	\N	9.24	1955-12-23 00:00:00	张琼英	510702195512233128
0	735	1	3	3	106310120007	510702195605233119	1	57	3	3	3	1	2	1	1	1	1	1	167.0	77.0	95.0	27.6095	166	110	55	42.04	88.41	49.42	2.23	2.11	2.99	0	42.04	0.341	1.73	2.23	0	88.41	0.31	1.72	2.11	0	49.42	\N	\N	2.99	1956-05-23 00:00:00	兰伦富	510702195605233119
0	736	1	3	1	106310120001	510702196901173119	1	44	2	2	2	1	3	3	2	3	1	1	175.0	80.0	91.0	26.1224	134	86	55	8.2	258.29	\N	0.266	1.95	\N	0.03	8.2	\N	\N	0.266	0	258.29	0.293	1.49	1.95	\N	\N	\N	\N	\N	1969-01-17 00:00:00	刘钢	510702196901173119
0	737	1	3	3	106310080059	510702195607093164	2	57	3	3	3	1	1	1	1	1	1	1	152.0	48.0	70.0	20.7756	164	90	9	0.29	38.19	358.4	7.55	8.01	7.93	0	0.29	0.318	1.53	7.55	0	38.19	0.301	1.48	8.01	0	358.4	\N	\N	7.93	1956-07-09 00:00:00	张秀华	510702195607093164
0	739	1	3	3	106310250114	510702196707153114	1	46	2	3	2	1	1	1	-1	-1	1	1	175.0	80.0	85.0	26.1224	106	82	55	0.11	64.5	1.15	0.09	0.09	0.12	0	0.11	0.365	1.86	0.09	0	64.5	0.367	1.77	0.09	0.01	1.15	\N	\N	0.12	1967-07-15 00:00:00	黄兴民	510702196707153114
0	740	1	3	3	106310080032	510702196307193117	1	50	3	3	3	1	1	3	1	1	1	1	167.0	72.0	88.0	25.8166	152	98	19	47.52	326.83	86.63	0.45	0.67	0.47	0	47.52	0.324	1.52	0.45	0	326.83	0.324	1.77	0.67	0.01	86.63	\N	\N	0.47	1963-07-19 00:00:00	王元志	510702196307193117
0	741	1	3	3	106310250082	510702197012263143	2	42	2	2	2	1	1	1	1	1	1	1	150.0	53.0	58.0	23.5556	150	90	37	0.96	57.94	3.95	0.11	0.12	0.14	0	0.96	0.331	1.99	0.11	0	57.94	0.42	1.65	0.12	0	3.95	\N	\N	0.14	1970-12-26 00:00:00	杨秀琼	510702197012263143
0	742	1	3	3	106311040039	510702197703292859	1	36	2	2	2	1	1	3	-1	-1	1	1	168.0	66.0	84.0	23.3844	112	70	17	0	38.93	4.03	0.11	0.1	0.08	0	0	0.392	1.86	0.11	0	38.93	0.356	1.8	0.1	0.04	4.03	\N	\N	0.08	1977-03-29 00:00:00	张先斌	510702197703292859
0	743	1	3	3	106310090022	510702197105262828	2	42	2	2	2	1	3	1	1	1	1	1	153.0	55.0	76.0	23.4952	162	60	24	0	96.21	25.97	1.68	0.13	0.25	0.05	0	\N	\N	1.68	0	96.21	0.324	1.65	0.13	0	25.97	\N	\N	0.25	1971-05-26 00:00:00	林远蓉	510702197105262828
0	744	1	3	3	106310090021	510702197009203158	1	43	2	2	2	1	3	1	2	3	1	1	165.0	50.0	65.0	18.3655	128	74	11	7.89	19.35	10.29	6.71	7.63	7.46	0	7.89	0.323	0.73	6.71	0	19.35	0.348	0.83	7.63	0	10.29	\N	\N	7.46	1970-09-20 00:00:00	高胜	510702197009203158
0	745	1	3	3	106311040020	510703197209152419	1	41	2	2	2	1	3	1	2	1	1	1	160.0	65.0	80.0	25.3906	138	80	26	6.03	26.79	11.17	5.65	5.43	5.47	0	6.03	0.325	1.41	5.65	0	26.79	0.334	1.51	5.43	0	11.17	\N	\N	5.47	1972-09-15 00:00:00	林中飞	510703197209152419
0	747	1	3	1	106310110017	510702195401263121	2	59	3	3	3	1	1	3	1	1	2	2	153.0	65.0	83.0	27.7671	180	100	56	0	203.3	\N	0.1	0.1	\N	0	0	0.343	1.76	0.1	0	203.3	0.369	1.93	0.1	\N	\N	\N	\N	\N	1954-01-26 00:00:00	李尚英	510702195401263121
0	749	1	3	1	106310290222	510721197012220468	2	42	2	2	2	1	1	3	-1	-1	1	1	153.0	50.0	73.0	21.3593	128	90	21	0.57	706.82	\N	0.1	0.12	\N	0	0.57	0.334	1.72	0.1	0	706.82	0.302	1.91	0.12	\N	\N	\N	\N	\N	1970-12-22 00:00:00	罗远碧	510721197012220468
0	751	1	3	3	106310090053	510702195507103126	2	58	3	3	3	1	1	1	1	2	1	1	160.0	66.0	88.0	25.7812	132	86	12	9.61	12.8	9.54	7.66	7.69	6.07	0	9.61	0.342	1.21	7.66	0	12.8	0.327	1.24	7.69	0	9.54	\N	\N	6.07	1955-07-10 00:00:00	汪友珍	510702195507103126
0	752	1	3	3	106310090111	510703198209202441	2	31	2	2	1	1	2	3	1	1	1	1	160.0	50.0	62.0	19.5312	112	68	11	0.17	325.56	62.79	0.1	0.1	0.09	0	0.17	0.342	1.69	0.1	0	325.56	0.335	1.78	0.1	0	62.79	\N	\N	0.09	1982-09-20 00:00:00	刘晓川	510703198209202441
0	753	1	3	1	106310110089	510702197412163125	2	38	2	2	2	1	2	1	-1	-1	1	1	162.0	49.0	61.0	18.6709	102	64	14	275.48	610.54	\N	7.32	7.82	\N	0	275.48	0.305	0.66	7.32	0	610.54	0.295	0.61	7.82	\N	\N	\N	\N	\N	1974-12-16 00:00:00	刘小君	510702197412163125
0	754	1	3	3	106311040057	220102198109015042	2	32	2	2	1	2	2	1	-1	-1	1	1	152.0	54.0	76.0	23.3726	114	60	27	5.51	1001	226.19	0.1	0.8	0.07	0	5.51	0.324	1.75	0.1	0.01	1001	0.338	1.86	0.8	0	226.19	\N	\N	0.07	1981-09-01 00:00:00	张艳艳	220102198109015042
0	755	1	3	3	106310080090	510702197011043122	2	42	2	2	2	1	3	1	1	1	1	1	156.0	48.0	70.0	19.7239	110	62	8	90.26	74.32	55.66	5.13	8.9	7.33	0	90.26	0.319	1.64	5.13	0	74.32	0.311	1.48	8.9	0	55.66	\N	\N	7.33	1970-11-04 00:00:00	刘远秀	510702197011043122
0	756	1	3	3	106310090083	510702195712163144	2	55	3	3	3	1	3	1	1	1	1	1	158.0	55.0	74.0	22.0317	152	74	12	0	691.95	99.6	0.09	0.1	0.13	0	0	0.32	1.79	0.09	0	691.95	0.318	1.94	0.1	0	99.6	\N	\N	0.13	1957-12-16 00:00:00	尹华玉	510702195712163144
0	757	1	3	1	106310090039	510702197010163122	2	42	2	2	2	1	2	1	-1	-1	1	1	150.0	45.0	64.0	20	120	60	8	7.56	372.4	\N	9.92	9.52	\N	0	7.56	0.34	0.28	9.92	0.01	372.4	0.452	0.4	9.52	\N	\N	\N	\N	\N	1970-10-16 00:00:00	魏莉	510702197010163122
0	758	1	3	3	106310300100	510702197408112819	1	39	2	2	2	1	3	1	2	3	1	1	180.0	76.0	86.0	23.4568	129	87	30	11.97	100.3	100.26	10.69	10.85	9.8	0	11.97	0.338	0.01	10.69	0	100.3	0.309	0.03	10.85	0	100.26	\N	\N	9.8	1974-08-11 00:00:00	刘合波	510702197408112819
0	759	1	3	1	106310080066	510702196610053125	2	47	2	3	2	1	2	1	1	1	1	1	150.0	58.0	70.0	25.7778	102	72	10	12.83	1001	\N	4.87	4.86	\N	0	12.83	0.339	1.24	4.87	0	1001	0.334	1.06	4.86	\N	\N	\N	\N	\N	1966-10-05 00:00:00	赵太容	510702196610053125
0	760	1	3	2	106310250081	510721196610110467	2	47	2	3	2	1	1	1	1	1	1	1	158.0	57.0	69.0	22.8329	126	70	42	0.97	\N	4.95	9.18	\N	9.13	0	0.97	0.328	1.17	9.18	\N	\N	\N	\N	\N	0	4.95	\N	\N	9.13	1966-10-11 00:00:00	姚仁碧	510721196610110467
0	761	1	3	2	106310120027	51072119620207070X	2	51	3	3	3	1	1	1	1	1	1	1	150.0	50.0	83.0	22.2222	126	72	25	12.39	\N	25.99	2.42	\N	3.75	0	12.39	0.63	1.85	2.42	\N	\N	\N	\N	\N	0	25.99	\N	\N	3.75	1962-02-07 00:00:00	杨文珍	51072119620207070X
0	762	1	3	3	106310110108	510703198509282412	1	28	1	1	1	1	3	3	-1	-1	1	1	177.0	62.0	73.0	19.79	132	72	32	10.33	816.28	851.11	4.67	8.37	6.21	0	10.33	0.819	0.18	4.67	0	816.28	0.363	1.32	8.37	0	851.11	\N	\N	6.21	1985-09-28 00:00:00	刘东波	510703198509282412
0	763	1	3	1	106310100103	51070219560506313X	1	57	3	3	3	1	1	1	-1	-1	1	1	170.0	57.5	82.0	19.8962	134	90	13	20.02	568.23	\N	6.56	6.55	\N	0.01	20.02	0.325	0.92	6.56	0	568.23	0.33	0.95	6.55	\N	\N	\N	\N	\N	1956-05-06 00:00:00	邓林平	51070219560506313X
0	764	1	3	1	106307210039	510702197402232828	2	39	2	2	2	1	3	1	-1	-1	1	1	153.0	49.5	76.0	21.1457	142	100	23	3.87	121.6	\N	0.71	0.77	\N	0	3.87	0.32	0.72	0.71	0	121.6	0.286	0.71	0.77	\N	\N	\N	\N	\N	1974-02-23 00:00:00	王全会	510702197402232828
0	766	1	3	1	106310280246	510703199106132422	2	22	1	1	1	1	2	3	-1	-1	1	1	155.0	51.0	67.0	21.2279	100	60	35	1.13	320.78	\N	0.13	0.1	\N	0	1.13	0.324	1.67	0.13	0	320.78	0.301	1.88	0.1	\N	\N	\N	\N	\N	1991-06-13 00:00:00	魏媛媛	510703199106132422
0	767	1	3	3	106310110004	510702196509193123	2	48	2	3	2	1	1	3	-1	-1	1	1	160.0	66.0	88.0	25.7812	136	90	18	3.36	69.32	15.78	3.94	3.96	4.93	0	3.36	0.334	1.62	3.94	0	69.32	0.318	1.63	3.96	0	15.78	\N	\N	4.93	1965-09-19 00:00:00	陈素琼	510702196509193123
0	769	1	3	2	106310110009	510702196502013118	1	48	2	3	2	1	1	3	2	3	1	1	160.0	51.0	67.0	19.9219	118	70	15	14.6	\N	94.17	8.98	\N	8.45	0	14.6	0.309	0.98	8.98	\N	\N	\N	\N	\N	0	94.17	\N	\N	8.45	1965-02-01 00:00:00	刘德军	510702196502013118
0	770	1	3	3	106310080067	510702196302133123	2	50	3	3	3	1	3	3	1	1	2	2	155.0	67.0	90.0	27.8876	150	96	13	4.88	168.5	2.08	8.52	8.75	8.85	0	4.88	0.35	1.27	8.52	0	168.5	0.334	1.34	8.75	0	2.08	\N	\N	8.85	1963-02-13 00:00:00	羊华珍	510702196302133123
0	771	1	3	1	106310090110	510702195506283110	1	58	3	3	3	1	3	3	2	3	1	1	150.0	50.0	68.0	22.2222	132	78	14	0.88	594.75	\N	4.83	5.39	\N	0	0.88	0.367	1.55	4.83	0	594.75	0.332	1.46	5.39	\N	\N	\N	\N	\N	1955-06-28 00:00:00	魏金成	510702195506283110
0	772	1	3	3	106311040023	510725198909092720	2	24	1	1	1	1	3	3	-1	-1	1	1	165.0	72.0	85.0	26.4463	106	68	81	3.07	1001	792.93	0.16	0.19	0.21	0	3.07	0.501	0.18	0.16	0	1001	0.313	1.76	0.19	0	792.93	\N	\N	0.21	1989-09-09 00:00:00	罗朝莉	510725198909092720
0	774	1	3	3	106307200024	510702196309143121	2	49	2	3	2	1	1	1	1	1	1	1	150.0	50.0	88.0	22.2222	124	84	26	27.85	64.27	127.6	4.07	3.48	4.3	0	27.85	0.314	1.34	4.07	0.01	64.27	0.301	1.3	3.48	0	127.6	\N	\N	4.3	1963-09-14 00:00:00	何秀华	510702196309143121
0	775	1	3	3	106307190032	510702195405203126	2	59	3	3	3	1	3	1	1	1	1	1	155.0	61.0	90.0	25.3902	126	82	26	1.21	3.08	11.21	9.71	10.03	9.21	0	1.21	0.325	0.31	9.71	0	3.08	0.335	0.29	10.03	0	11.21	\N	\N	9.21	1954-05-20 00:00:00	钟定英	510702195405203126
0	776	1	3	3	106308150017	51222219790625449X	1	34	2	2	1	1	2	1	-1	-1	1	1	170.0	63.0	77.5	21.7993	136	80	21	0.05	15.87	1.01	0.09	0.12	0.15	0	0.05	0.34	1.76	0.09	0	15.87	0.294	1.95	0.12	0	1.01	\N	\N	0.15	1979-06-25 00:00:00	文小军	51222219790625449X
0	777	1	3	3	106307200013	510781198604180843	2	27	1	1	1	1	3	1	-1	-1	1	1	155.0	40.0	68.0	16.6493	102	70	15	0.18	117.22	4.01	0.12	0.1	0.12	0	0.18	0.337	2	0.12	0	117.22	0.324	2	0.1	0	4.01	\N	\N	0.12	1986-04-18 00:00:00	蒋依锘	510781198604180843
0	778	1	3	2	106310160033	510702196212123124	2	50	3	3	3	1	1	1	1	1	1	1	147.0	42.0	57.0	19.4363	116	64	18	6.25	\N	11.64	8.65	\N	8.68	0	6.25	0.362	0.78	8.65	\N	\N	\N	\N	\N	0	11.64	\N	\N	8.68	1962-12-12 00:00:00	骆春兰	510702196212123124
0	779	1	3	2	106310300153	510703198412022411	1	28	1	1	1	1	3	1	-1	-1	1	1	173.0	90.0	90.0	30.0712	128	90	133	0.2	\N	255.98	8.92	\N	8.53	0	0.2	0.365	1.21	8.92	\N	\N	\N	\N	\N	0	255.98	\N	\N	8.53	1984-12-02 00:00:00	刘波	510703198412022411
0	780	1	3	3	106307210044	510702195910073123	2	53	3	3	3	1	1	1	1	1	2	2	152.0	64.5	90.0	27.9172	114	74	17	0.33	241.34	2.65	6.012	6.43	5.63	0	0.33	0.336	1.58	6.012	0	241.34	0.325	1.432	6.43	0	2.65	\N	\N	5.63	1959-10-07 00:00:00	唐洪秀	510702195910073123
0	781	1	3	2	106307190021	510702195507163129	2	58	3	3	3	1	1	3	1	1	1	1	159.0	49.0	76.0	19.3821	134	80	14	0.76	\N	239	9.04	\N	9.27	0	0.76	0.313	1.44	9.04	\N	\N	\N	\N	\N	0	239	\N	\N	9.27	1955-07-16 00:00:00	唐祝英	510702195507163129
0	784	1	3	3	106307200011	510702195403233110	1	59	3	3	3	1	1	3	2	1	1	1	157.0	69.0	88.0	27.993	188	98	68	0	5.1	24.86	0.27	0.1	0.11	0	0	0.334	1.79	0.27	0	5.1	0.368	1.6	0.1	0	24.86	\N	\N	0.11	1954-03-23 00:00:00	吴荣清	510702195403233110
0	786	1	3	3	106310180033	510702195508133159	1	58	3	3	3	1	1	3	1	1	1	1	160.0	50.0	67.0	19.5312	84	64	35	2.52	15.06	43.48	6.85	6.95	7.24	0	2.52	0.315	1.31	6.85	0	15.06	0.306	1.33	6.95	0.02	43.48	\N	\N	7.24	1955-08-13 00:00:00	刘建	510702195508133159
0	788	1	3	1	106310120074	510702196804103119	1	45	2	3	2	1	1	1	-1	-1	1	1	163.0	62.0	80.0	23.3355	128	60	21	73.39	452.01	\N	3.45	3.58	\N	0	73.39	0.313	1.61	3.45	0	452.01	0.328	1.74	3.58	\N	\N	\N	\N	\N	1968-04-10 00:00:00	钟定宝	510702196804103119
0	790	1	3	1	106311030027	511622198404208042	2	29	1	1	1	1	3	3	1	1	1	1	153.0	55.0	74.0	23.4952	122	74	18	0.96	107.18	\N	0.16	0.13	\N	0	0.96	0.346	1.59	0.16	0	107.18	0.309	1.7	0.13	\N	\N	\N	\N	\N	1984-04-20 00:00:00	周治娟	511622198404208042
0	792	1	3	3	106310080015	510702197005143119	1	43	2	2	2	1	1	3	1	1	1	1	163.0	75.0	95.0	28.2284	138	70	40	10.95	77.97	0.07	9.04	9.49	12.5	0	10.95	0.343	1.33	9.04	0	77.97	0.331	1.27	9.49	56.52	0.07	0.317	0.02	12.5	1970-05-14 00:00:00	林忠武	510702197005143119
0	793	1	3	3	106311090059	510781198706026345	2	26	1	1	1	1	3	1	1	1	1	1	155.0	65.0	90.0	27.0552	116	68	35	0.12	170.05	5.79	0.09	0.13	0.11	0	0.12	0.343	1.72	0.09	0	170.05	0.334	1.77	0.13	0	5.79	\N	\N	0.11	1987-06-02 00:00:00	杨丽	510781198706026345
0	794	1	3	2	106307210035	510702195705293127	2	56	3	3	3	1	1	1	-1	-1	1	1	153.0	43.0	70.0	18.369	141	81	46	0.08	\N	25.14	6.18	\N	0.36	0	0.08	0.339	1.79	6.18	\N	\N	\N	\N	\N	0.01	25.14	\N	\N	0.36	1957-05-29 00:00:00	张蓉芳	510702195705293127
0	795	1	3	3	106307200016	510702197712022850	1	35	2	2	2	1	1	1	-1	-1	1	1	170.0	66.0	82.0	22.8374	118	84	111	13.27	60.29	30.02	5	5.52	5.13	0	13.27	0.314	1.71	5	0	60.29	0.335	1.63	5.52	0	30.02	\N	\N	5.13	1977-12-02 00:00:00	赵成红	510702197712022850
0	796	1	3	1	106307210041	510702195509133126	2	57	3	3	3	1	1	3	1	1	1	1	130.0	32.0	73.0	18.9349	120	71	15	74.87	256.77	\N	0.86	1.08	\N	0	74.87	0.336	0.38	0.86	0	256.77	0.289	0.34	1.08	\N	\N	\N	\N	\N	1955-09-13 00:00:00	罗明兰	510702195509133126
0	797	1	3	3	106307190026	51070219590218312X	2	54	3	3	3	1	3	1	1	1	1	1	155.0	50.0	78.0	20.8117	104	70	25	52.1	118.21	43.12	1.5	1.54	2.03	0	52.1	0.317	1.7	1.5	0	118.21	0.366	1.64	1.54	0	43.12	\N	\N	2.03	1959-02-18 00:00:00	李琼珍	51070219590218312X
0	798	1	3	3	106307220027	510721197406110229	2	39	2	2	2	1	3	1	1	1	1	1	167.0	55.0	72.0	19.721	108	74	31	4.76	85.02	80.98	9.29	9.58	8.25	0	4.76	0.377	0.87	9.29	0	85.02	0.368	1.09	9.58	0	80.98	\N	\N	8.25	1974-06-11 00:00:00	周秀华	510721197406110229
0	799	1	3	3	106310160005	510702195802083113	1	55	3	3	3	1	2	1	1	1	1	1	157.0	60.0	80.0	24.3418	138	80	24	0.62	439.95	75.18	0.11	0.14	0.15	0	0.62	0.328	1.81	0.11	0	439.95	0.287	1.87	0.14	0	75.18	\N	\N	0.15	1958-02-08 00:00:00	冯德明	510702195802083113
0	800	1	3	1	106310120019	510721197206070349	2	41	2	2	2	1	3	1	1	1	1	1	155.0	45.0	65.0	18.7305	132	80	38	3.01	119.75	\N	2.53	2.48	\N	0	3.01	0.335	1.36	2.53	0	119.75	0.321	1.32	2.48	\N	\N	\N	\N	\N	1972-06-07 00:00:00	杨明菊	510721197206070349
0	801	1	3	3	106310130022	519002197508165141	2	38	2	2	2	1	3	1	-1	-1	1	1	167.0	61.0	77.0	21.8724	134	82	29	7.27	1001	1001	9.42	9.52	0.16	0	7.27	0.354	0.1	9.42	0	1001	0.359	0.08	9.52	0	1001	\N	\N	0.16	1975-08-16 00:00:00	李天菊	519002197508165141
0	802	1	3	3	106310120120	510702195610103124	2	57	3	3	3	1	3	3	1	1	1	1	155.0	55.0	84.0	22.8928	128	60	30	42.83	6.66	44.42	8.65	1.25	7.53	0	42.83	0.319	0.56	8.65	0	6.66	0.354	1.63	1.25	0	44.42	\N	\N	7.53	1956-10-10 00:00:00	王苹芳	510702195610103124
0	803	1	3	3	106307190035	510702197107173124	2	42	2	2	2	1	1	2	1	1	1	1	163.0	61.0	78.0	22.9591	110	66	22	0.07	1001	93.08	0.16	0.19	0.25	0	0.07	0.343	1.63	0.16	0	1001	0.315	1.68	0.19	0	93.08	\N	\N	0.25	1971-07-17 00:00:00	黄晓琼	510702197107173124
0	804	1	3	1	106310130121	510823198210193483	2	30	2	2	1	1	2	1	1	1	1	1	160.0	60.0	77.0	23.4375	118	70	74	0.91	115.2	\N	0.24	0.01	\N	0	0.91	0.342	1.42	0.24	0	115.2	0.33	1.8	0.01	\N	\N	\N	\N	\N	1982-10-19 00:00:00	江燕	510823198210193483
0	806	1	3	2	106307210027	510702195403043114	1	59	3	3	3	1	1	3	2	1	2	2	167.0	65.0	93.0	23.3067	145	89	20	18.79	\N	135.55	4.2	\N	4.37	0	18.79	0.318	1.6	4.2	\N	\N	\N	\N	\N	0	135.55	\N	\N	4.37	1954-03-04 00:00:00	胥兴根	510702195403043114
0	809	1	3	3	106310150075	510702196207093127	2	51	3	3	3	1	1	1	1	2	1	1	165.0	90.0	102.0	33.0579	134	80	40	8.7	18.03	14.04	0.09	2.83	2.99	0.01	8.7	\N	\N	0.09	0	18.03	0.32	1.93	2.83	0	14.04	\N	\N	2.99	1962-07-09 00:00:00	刘定秀	510702196207093127
0	810	1	3	1	106310270220	510703198610192438	1	27	1	1	1	1	2	1	-1	-1	1	1	173.0	80.0	82.0	26.7299	136	84	53	0.86	1001	\N	0.08	0.1	\N	0.03	0.86	0.447	1.69	0.08	0	1001	0.308	1.77	0.1	\N	\N	\N	\N	\N	1986-10-19 00:00:00	邹仕波	510703198610192438
0	811	1	3	1	106311040031	510721197012190705	2	42	2	2	2	1	1	1	-1	-1	1	1	152.0	55.0	70.0	23.8054	130	73	16	4.25	28.77	\N	6.98	4.66	\N	0	4.25	0.355	0.83	6.98	0.12	28.77	0.687	0.02	4.66	\N	\N	\N	\N	\N	1970-12-19 00:00:00	王玉英	510721197012190705
0	812	1	3	2	106311050015	510702197010033117	1	43	2	2	2	1	1	1	-1	-1	1	1	167.0	67.0	90.0	24.0238	126	78	14	42.63	\N	71.46	9.29	\N	9	0	42.63	0.334	0.17	9.29	\N	\N	\N	\N	\N	0	71.46	\N	\N	9	1970-10-03 00:00:00	张世明	510702197010033117
0	814	1	3	1	106310120037	510702196302023119	1	50	3	3	3	1	1	3	-1	-1	1	1	163.0	58.0	73.0	21.83	132	66	18	37.39	852.3	\N	0.23	0.09	\N	0	37.39	0.3	1.58	0.23	0	852.3	1.76	0.7	0.09	\N	\N	\N	\N	\N	1963-02-02 00:00:00	刘学	510702196302023119
0	815	1	3	1	106310140080	510702195410023111	1	59	3	3	3	1	3	3	2	2	1	1	162.0	62.0	78.0	23.6244	140	92	9	2.17	79.62	\N	1.12	1.11	\N	0	2.17	0.337	1.52	1.12	0	79.62	0.403	1.39	1.11	\N	\N	\N	\N	\N	1954-10-02 00:00:00	蒋忠富	510702195410023111
0	816	1	3	1	106310140081	510722198603287067	2	27	1	1	1	1	2	1	1	1	1	1	155.0	65.0	82.0	27.0552	112	74	9	0	3.15	\N	0.14	0.13	\N	0	0	0.316	1.34	0.14	0	3.15	0.318	1.46	0.13	\N	\N	\N	\N	\N	1986-03-28 00:00:00	林小青	510722198603287067
0	817	1	3	2	106310240049	510702197505202816	1	38	2	2	2	1	3	1	-1	-1	1	1	173.0	68.0	85.0	22.7204	126	70	23	3.46	\N	11.2	8.76	\N	8.72	0	3.46	0.288	0.3	8.76	\N	\N	\N	\N	\N	0	11.2	\N	\N	8.72	1975-05-20 00:00:00	刘青	510702197505202816
0	818	1	3	3	106308140004	510702195602023124	2	57	3	3	3	1	1	1	1	1	2	2	158.0	60.5	79.3	24.2349	130	78	13	4.09	46.74	12.5	9.27	9.06	8.61	0	4.09	0.351	1.42	9.27	0	46.74	0.323	1.48	9.06	0	12.5	\N	\N	8.61	1956-02-02 00:00:00	陈尚兰	510702195602023124
0	821	1	3	2	106308130024	510702195402183123	2	59	3	3	3	1	1	1	1	1	1	1	140.0	43.0	71.0	21.9388	102	64	15	30.59	\N	21.55	8.29	\N	8.3	0	30.59	0.321	1.11	8.29	\N	\N	\N	\N	\N	0	21.55	\N	\N	8.3	1954-02-18 00:00:00	张素英	510702195402183123
0	823	1	3	3	106310280164	510702197308163125	2	40	2	2	2	1	1	1	1	1	1	1	167.0	68.0	86.0	24.3824	118	80	21	475.74	505.03	460.53	0.31	0.31	0.26	0	475.74	0.352	1.59	0.31	0	505.03	0.329	1.75	0.31	0	460.53	\N	\N	0.26	1973-08-16 00:00:00	王世芳	510702197308163125
0	824	1	3	3	106308150004	510702195501023125	2	58	3	3	3	1	1	1	1	1	1	1	147.5	46.0	73.0	21.1433	130	72	24	9.21	73.07	13.55	6.42	6.17	6.21	0	9.21	0.316	0.96	6.42	0	73.07	0.347	1.01	6.17	0	13.55	\N	\N	6.21	1955-01-02 00:00:00	李琼英	510702195501023125
0	825	1	3	1	106310160156	510702195410143121	2	59	3	3	3	1	1	1	1	1	1	1	155.0	50.0	70.0	20.8117	130	70	15	11.64	98.18	\N	7.06	7.64	\N	0	11.64	0.301	0.7	7.06	0	98.18	0.354	0.63	7.64	\N	\N	\N	\N	\N	1954-10-14 00:00:00	邹坤琼	510702195410143121
0	827	1	3	3	106308120035	510702195609093117	1	56	3	3	3	1	1	1	2	3	1	1	163.0	56.0	76.0	21.0772	94	68	26	4.29	7.38	15.74	5.26	5.59	4.55	0	4.29	0.302	1.59	5.26	0	7.38	0.348	1.58	5.59	0	15.74	\N	\N	4.55	1956-09-09 00:00:00	陈万兴	510702195609093117
0	829	1	3	3	106307210002	510702195403183117	1	59	3	3	3	1	1	1	2	3	1	1	150.0	48.0	84.0	21.3333	154	96	9	23.15	31.15	43.75	8.25	8.26	7.35	0	23.15	0.318	1.49	8.25	0	31.15	0.44	1.55	8.26	0	43.75	\N	\N	7.35	1954-03-18 00:00:00	万合成	510702195403183117
0	831	1	3	3	106308140020	510723197609161264	2	36	2	2	2	1	3	1	1	1	1	1	162.5	61.0	84.0	23.1006	116	80	30	0.15	44.66	3.18	0.07	0.1	0.09	0	0.15	0.302	1.9	0.07	0	44.66	0.334	1.68	0.1	0	3.18	\N	\N	0.09	1976-09-16 00:00:00	杨晓英	510723197609161264
0	832	1	3	3	106308140021	510702196903052927	2	44	2	2	2	1	3	1	1	1	1	1	145.0	53.0	84.2	25.2081	120	76	15	5.5	1001	384.61	2.19	2.27	2.75	0	5.5	0.315	1.42	2.19	0	1001	0.33	1.54	2.27	0	384.61	\N	\N	2.75	1969-03-05 00:00:00	徐惠屏	510702196903052927
0	833	1	3	3	106308140025	510702196209203123	2	50	3	3	3	1	3	1	1	1	1	1	152.5	76.0	110.0	32.6794	128	72	31	0.38	0.64	1.11	10.08	10.17	10.48	0	0.38	0.316	1.44	10.08	0.3	0.64	0.343	0.04	10.17	0.6	1.11	\N	\N	10.48	1962-09-20 00:00:00	罗宗容	510702196209203123
0	834	1	3	3	106308130027	510702195408163123	2	58	3	3	3	1	3	3	1	1	2	2	145.0	60.0	89.0	28.5375	158	72	15	7.8	0.42	9.37	9.42	11.65	8.73	0	7.8	0.328	7.8	9.42	0.2	0.42	0.354	0.01	11.65	0	9.37	\N	\N	8.73	1954-08-16 00:00:00	姚桂琼	510702195408163123
0	835	1	3	3	106308130014	510702196508113128	2	48	2	3	2	1	1	1	1	1	1	1	155.0	50.0	70.0	20.8117	102	76	93	0.69	267.13	19.89	7.4	7.83	7.86	0.01	0.69	0.314	1.4	7.4	0	267.13	0.328	1.61	7.83	0	19.89	\N	\N	7.86	1965-08-11 00:00:00	李桂华	510702196508113128
0	836	1	3	1	106310300038	510702196406063123	2	49	2	3	2	1	3	1	1	3	1	1	150.0	50.0	68.0	22.2222	124	68	53	1.96	206.98	\N	8.66	8.22	\N	0	1.96	0.276	1.96	8.66	0	206.98	0.312	1.59	8.22	\N	\N	\N	\N	\N	1964-06-06 00:00:00	周福容	510702196406063123
0	837	1	3	1	106310170130	510703198609062425	2	27	1	1	1	1	1	1	-1	-1	1	1	155.0	65.0	70.0	27.0552	114	80	12	0	1.61	\N	0.12	0.13	\N	0	0	0.341	1.13	0.12	0	1.61	0.306	1.87	0.13	\N	\N	\N	\N	\N	1986-09-06 00:00:00	蒋玲	510703198609062425
0	839	1	3	3	106310120115	510702195508293128	2	58	3	3	3	1	1	1	-1	-1	1	1	155.0	58.0	74.0	24.1415	121	77	33	4.75	36.06	35.9	8.16	8.25	7.6	0	4.75	0.319	1.49	8.16	0	36.06	0.314	1.44	8.25	0	35.9	\N	\N	7.6	1955-08-29 00:00:00	郑玉华	510702195508293128
0	840	1	3	3	106310150017	51070219650620312X	2	48	2	3	2	1	1	1	1	1	1	1	158.0	66.0	83.0	26.4381	122	84	19	5.67	520.9	73.65	8.07	8.46	7.94	0	5.67	0.335	1.16	8.07	0	520.9	0.321	1.11	8.46	0	73.65	\N	\N	7.94	1965-06-20 00:00:00	刘蓉	51070219650620312X
0	841	1	3	1	106310280195	510703198606102428	2	27	1	1	1	1	3	1	-1	-1	1	1	157.0	42.0	60.0	17.0392	96	60	9	0.02	51.3	\N	0.11	0.07	\N	0	0.02	0.343	1.8	0.11	0	51.3	0.307	1.81	0.07	\N	\N	\N	\N	\N	1986-06-10 00:00:00	陈家丽	510703198606102428
0	842	1	3	3	106311030025	510702195806213122	2	55	3	3	3	1	3	1	-1	-1	1	1	140.0	60.0	74.0	30.6122	128	80	30	1.57	40.08	2.03	7.8	7.63	6.36	0	1.57	0.324	1.84	7.8	0	40.08	0.317	1.09	7.63	0	2.03	\N	\N	6.36	1958-06-21 00:00:00	谭明芳	510702195806213122
0	845	1	3	1	106307310010	510702196602033140	2	47	2	3	2	1	3	1	-1	-1	3	3	155.0	65.0	94.0	27.0552	130	88	23	2.23	47.14	\N	4.98	5.21	\N	0	2.23	0.308	1.38	4.98	0	47.14	0.309	1.4	5.21	\N	\N	\N	\N	\N	1966-02-03 00:00:00	魏晓蓉	510702196602033140
0	846	1	3	3	106308140039	510702196604183118	1	47	2	3	2	1	3	1	1	2	1	1	173.0	89.0	99.0	29.737	124	80	53	3.41	0	13.94	5.68	8.69	7.24	0.04	3.41	0.722	0.26	5.68	0	0	88.17	0.26	8.69	0.01	13.94	\N	\N	7.24	1966-04-18 00:00:00	陈尚虎	510702196604183118
0	847	1	3	3	106308140034	510702196310093125	2	49	2	3	2	1	1	1	1	1	1	1	150.0	62.0	85.0	27.5556	116	78	40	20.82	1001	1001	1.63	1.65	2.21	0	20.82	0.36	1.54	1.63	0	1001	0.301	1.56	1.65	0	1001	\N	\N	2.21	1963-10-09 00:00:00	罗宗香	510702196310093125
0	848	1	3	1	106308200013	51070419870301352X	2	26	1	1	1	1	2	3	1	1	1	1	159.0	50.0	65.5	19.7777	110	62	13	21.4	142.98	\N	0.1	0.07	\N	0	21.4	0.328	1.78	0.1	0	142.98	0.388	1.71	0.07	\N	\N	\N	\N	\N	1987-03-01 00:00:00	张莎莎	51070419870301352X
0	849	1	3	1	106308130010	510702197512202814	1	37	2	2	2	1	3	1	-1	-1	1	1	163.0	60.0	84.0	22.5827	98	74	24	15.8	87.61	\N	0.293	1.89	\N	0.03	15.8	\N	\N	0.293	0	87.61	0.326	1.72	1.89	\N	\N	\N	\N	\N	1975-12-20 00:00:00	陈小军	510702197512202814
0	850	1	3	1	106310300165	510623196410281322	2	49	2	3	2	1	3	1	-1	-1	1	1	147.0	55.0	68.0	25.4524	124	62	15	12.03	19.34	\N	9.03	9.21	\N	0	12.03	0.366	1.02	9.03	0	19.34	0.313	0.93	9.21	\N	\N	\N	\N	\N	1964-10-28 00:00:00	赵宁芳	510623196410281322
0	853	1	3	2	106310270154	510702196211263133	1	50	3	3	3	1	1	1	2	2	1	1	165.0	52.0	64.0	19.1001	108	66	44	7.92	\N	24.22	2.81	\N	2.45	0	7.92	0.333	0.53	2.81	\N	\N	\N	\N	\N	0	24.22	\N	\N	2.45	1962-11-26 00:00:00	付荣	510702196211263133
0	857	1	3	1	106308130028	510702197006163111	1	43	2	2	2	1	3	1	-1	-1	1	1	168.0	50.0	66.0	17.7154	192	140	16	0	892.8	\N	0.004	7.08	\N	0.03	0	\N	\N	0.004	0	892.8	0.321	1	7.08	\N	\N	\N	\N	\N	1970-06-16 00:00:00	王治华	510702197006163111
0	858	1	3	3	106308190038	510702196610093143	2	46	2	3	2	1	3	1	1	1	1	1	160.0	59.0	81.0	23.0469	120	64	12	0.65	182.51	1.59	0.15	0.17	0.13	0	0.65	0.6327	1.34	0.15	0	182.51	0.324	1.88	0.17	0	1.59	\N	\N	0.13	1966-10-09 00:00:00	蒋世芬	510702196610093143
0	859	1	3	3	106310090010	51070219701023551X	1	42	2	2	2	1	2	3	2	3	1	1	165.0	49.0	66.0	17.9982	124	74	13	9.83	1001	365.95	0.25	0.26	0.28	0	9.83	0.343	1.49	0.25	0	1001	0.326	1.57	0.26	0	365.95	\N	\N	0.28	1970-10-23 00:00:00	刘大富	51070219701023551X
0	860	1	3	1	106310290084	510702195708093139	1	56	3	3	3	1	1	1	1	3	1	1	162.0	68.0	83.0	25.9107	144	76	21	6.84	584.3	\N	3.44	3.14	\N	0	6.84	0.309	1.1	3.44	0	584.3	0.331	1.06	3.14	\N	\N	\N	\N	\N	1957-08-09 00:00:00	魏定玉	510702195708093139
0	861	1	3	3	106310280204	51070219630910312X	2	50	3	3	3	1	2	1	1	2	1	1	163.0	62.0	80.0	23.3355	138	93	25	0.09	1001	419.66	0.19	0.18	0.17	0	0.09	0.345	1.82	0.19	0	1001	0.318	1.81	0.18	0	419.66	\N	\N	0.17	1963-09-10 00:00:00	肖平	51070219630910312X
0	863	1	3	3	106308120038	510702196901283131	1	44	2	2	2	1	1	1	1	2	1	1	170.0	57.0	79.0	19.7232	120	80	33	9.86	92.34	33.73	6.34	7.8	8	0.01	9.86	0.318	0.56	6.34	0	92.34	0.34	1.07	7.8	0	33.73	\N	\N	8	1969-01-28 00:00:00	卢修健	510702196901283131
0	866	1	3	3	106310250083	510922196910127460	2	44	2	2	2	1	1	1	1	1	1	1	160.0	53.0	73.0	20.7031	114	60	28	4.36	19.58	45.94	7.31	7.76	7.79	0	4.36	0.308	0.92	7.31	0	19.58	0.306	0.92	7.76	0	45.94	\N	\N	7.79	1969-10-12 00:00:00	杜凤莲	510922196910127460
0	867	1	3	1	106310250065	510727197902201929	2	34	2	2	1	1	1	3	-1	-1	3	3	155.0	88.0	100.0	36.6285	104	74	51	0.31	2.68	\N	0.11	0.12	\N	0	0.31	0.329	1.92	0.11	0	2.68	0.317	2.11	0.12	\N	\N	\N	\N	\N	1979-02-20 00:00:00	罗小娇	510727197902201929
0	868	1	3	3	106310280224	510702195411193112	1	58	3	3	3	1	1	1	2	3	1	1	165.0	67.0	70.0	24.6097	108	60	15	1.21	170.67	84.51	0.07	0.06	0.13	0	1.21	0.326	1.85	0.07	0	170.67	0.39	1.64	0.06	0	84.51	\N	\N	0.13	1954-11-19 00:00:00	张旭云	510702195411193112
0	869	1	3	3	106307210042	510702196202143121	2	51	3	3	3	1	1	1	1	1	1	1	140.0	42.0	83.0	21.4286	185	96	31	9.6	552.03	59.79	9.44	9.83	9.43	0	9.6	0.334	0.03	9.44	0	552.03	0.315	0.02	9.83	0	59.79	\N	\N	9.43	1962-02-14 00:00:00	潘先会	510702196202143121
0	870	1	3	3	106310280217	510702196802263127	2	45	2	3	2	1	3	1	1	1	1	1	150.0	48.0	64.0	21.3333	126	66	23	0.17	122.33	0.07	8.56	9.25	1.28	0	0.17	0.348	0.24	8.56	0	122.33	0.341	0.23	9.25	0.52	0.07	2.967	0.01	1.28	1968-02-26 00:00:00	吴怀蓉	510702196802263127
0	871	1	3	3	106309120024	510823198503152896	1	28	1	1	1	1	3	3	-1	-1	1	1	172.0	58.0	69.0	19.6052	120	74	21	0.17	76.88	9.53	0.12	0.12	0.16	0	0.17	0.309	1.82	0.12	0	76.88	0.305	1.76	0.12	0	9.53	\N	\N	0.16	1985-03-15 00:00:00	郭良兵	510823198503152896
0	872	1	3	3	106310290211	511121198006028835	1	33	2	2	1	1	2	1	2	3	1	1	170.0	73.0	86.0	25.2595	136	84	30	0	50.41	15.66	0.004	7.64	7.81	0.03	0	\N	\N	0.004	0	50.41	0.346	1.47	7.64	0	15.66	\N	\N	7.81	1980-06-02 00:00:00	王争	511121198006028835
0	873	1	3	3	106308190004	510721196909140847	2	43	2	2	2	1	3	1	1	1	1	1	165.0	63.0	86.0	23.1405	128	76	28	0	5.84	4.6	9.02	8.99	7.24	0	0	0.373	1.35	9.02	0	5.84	0.338	1.38	8.99	0	4.6	\N	\N	7.24	1969-09-14 00:00:00	马培兰	510721196909140847
0	874	1	3	3	106308190023	510702196112153123	2	51	3	3	3	1	3	1	1	1	1	1	160.0	59.0	88.0	23.0469	114	72	30	161.95	1001	330.26	2.94	1.18	3.22	0	161.95	0.325	1.41	2.94	0	1001	0.361	1.56	1.18	0	330.26	\N	\N	3.22	1961-12-15 00:00:00	李应秀	510702196112153123
0	875	1	3	1	106311070032	510703198209272415	1	31	2	2	1	1	1	1	1	1	1	1	168.0	61.0	68.0	21.6128	134	72	54	0	1001	\N	0.1	0.09	\N	0	0	0.302	1.39	0.1	0	1001	0.323	1.6	0.09	\N	\N	\N	\N	\N	1982-09-27 00:00:00	刘保隆	510703198209272415
0	876	1	3	3	106311070074	510703199004202418	1	23	1	1	1	1	2	1	1	1	1	1	175.0	55.0	62.0	17.9592	118	72	47	0.38	136.76	97.13	4.8	0.07	0.1	0	0.38	0.347	1.38	4.8	0	136.76	0.62	1.39	0.07	0	97.13	\N	\N	0.1	1990-04-20 00:00:00	李静	510703199004202418
0	877	1	3	3	106308160016	510703198609112437	1	26	1	1	1	1	3	1	1	2	1	1	170.0	55.0	72.0	19.0311	122	76	45	0	341.86	50.01	0.07	0.09	0.31	0	0	0.304	1.47	0.07	0	341.86	0.325	1.87	0.09	0	50.01	\N	\N	0.31	1986-09-11 00:00:00	罗俊	510703198609112437
0	878	1	3	3	106308210033	510702195811173110	1	54	3	3	3	1	3	1	3	3	3	3	165.0	65.0	88.0	23.8751	128	90	22	12.31	1001	939.86	6.03	6.56	5.73	0	12.31	0.323	2.01	6.03	0	1001	0.322	0.96	6.56	0	939.86	\N	\N	5.73	1958-11-17 00:00:00	张道光	510702195811173110
0	879	1	3	3	106308210032	510702196301233149	2	50	3	3	3	1	3	1	1	1	2	2	153.0	63.0	8.0	26.9127	150	98	18	9.3	89.44	26.85	0.005	4.88	5.32	0.03	9.3	\N	\N	0.005	0	89.44	0.318	1.39	4.88	0	26.85	\N	\N	5.32	1963-01-23 00:00:00	蒋伯芳	510702196301233149
0	881	1	3	3	106310220077	510702195512223122	2	57	3	3	3	1	1	1	1	1	1	1	150.0	51.0	65.0	22.6667	126	80	19	3.95	1001	39.5	7.76	8.05	7.47	0	3.95	0.334	1.71	7.76	0	1001	0.333	1.28	8.05	0	39.5	\N	\N	7.47	1955-12-22 00:00:00	朱高英	510702195512223122
0	882	1	3	3	106310210138	510702195504263124	2	58	3	3	3	1	1	1	1	1	1	1	150.0	53.0	73.0	23.5556	142	70	21	9.1	1001	526.39	8.9	8.47	8.99	0	9.1	0.322	1.79	8.9	0	1001	0.353	1.29	8.47	0	526.39	\N	\N	8.99	1955-04-26 00:00:00	李琼华	510702195504263124
0	886	1	3	3	106310290072	510702196304133127	2	50	3	3	3	1	1	1	1	3	1	1	155.0	62.0	83.0	25.8065	116	80	15	4.6	1001	233.24	0.019	3.77	6.25	0.02	4.6	\N	\N	0.019	0	1001	0.311	1.45	3.77	0	233.24	\N	\N	6.25	1963-04-13 00:00:00	刘素华	510702196304133127
0	887	1	3	1	106310280254	510702196909263127	2	44	2	2	2	1	1	1	1	1	1	1	160.0	57.0	76.0	22.2656	116	66	22	46.02	1001	\N	0.54	0.55	\N	0	46.02	0.314	1.81	0.54	0	1001	0.329	1.76	0.55	\N	\N	\N	\N	\N	1969-09-26 00:00:00	毛兴惠	510702196909263127
0	888	1	3	3	106310280165	510703198109302410	1	32	2	2	1	1	2	1	-1	-1	1	1	172.0	66.0	50.0	22.3094	104	70	38	44.58	1001	1001	8.19	8.49	8.1	0.02	44.58	0.341	0.01	8.19	0	1001	0.313	0.01	8.49	0	1001	\N	\N	8.1	1981-09-30 00:00:00	李建	510703198109302410
0	889	1	3	3	106308150023	510702196205253123	2	51	3	3	3	1	1	1	1	1	1	1	162.0	56.0	83.0	21.3382	100	70	36	6.84	576.72	740.28	8.26	8.51	7.76	0	6.84	0.322	1.59	8.26	0	576.72	0.33	1.6	8.51	0	740.28	\N	\N	7.76	1962-05-25 00:00:00	钟碧华	510702196205253123
0	890	1	3	3	106310280027	510702197104073128	2	42	2	2	2	1	2	1	1	1	1	1	165.0	57.0	77.0	20.9366	115	74	21	45.78	341.79	69.99	8.1	8.09	7.34	0	45.78	0.325	1.06	8.1	0	341.79	0.309	1.16	8.09	0	69.99	\N	\N	7.34	1971-04-07 00:00:00	肖玉红	510702197104073128
0	892	1	3	3	106308220026	510702196411113121	2	48	2	3	2	1	3	1	1	1	1	1	150.0	55.0	80.0	24.4444	148	88	29	33.54	1001	462.22	5.32	5.16	5.95	0	33.54	0.336	0.02	5.32	0	1001	0.293	0.02	5.16	0	462.22	\N	\N	5.95	1964-11-11 00:00:00	党海英	510702196411113121
0	893	1	3	3	106308260059	510702197209093117	1	40	2	2	2	1	3	1	2	1	1	1	154.0	65.0	93.0	27.4077	115	80	20	12.47	83.29	26.08	0.2	0.19	0.17	0	12.47	0.324	1.65	0.2	0	83.29	0.351	1.66	0.19	0	26.08	\N	\N	0.17	1972-09-09 00:00:00	毛军	510702197209093117
0	894	1	3	3	106308260064	510702195909283115	1	53	3	3	3	1	3	1	1	2	1	1	170.0	60.0	74.0	20.7612	126	81	16	10.08	74.91	30.05	8.52	8.56	8.46	0	10.08	0.354	1.34	8.52	0	74.91	0.31	1.36	8.56	0	30.05	\N	\N	8.46	1959-09-28 00:00:00	谭明光	510702195909283115
0	895	1	3	3	106310110094	510722198708092514	1	26	1	1	1	1	2	1	1	2	1	1	175.0	69.0	73.0	22.5306	118	66	45	0.17	463.14	48.62	0.13	0.09	0.29	0	0.17	0.301	1.89	0.13	0	463.14	0.33	1.78	0.09	0	48.62	\N	\N	0.29	1987-08-09 00:00:00	左天勇	510722198708092514
0	896	1	3	3	106310110095	510702196406143115	1	49	2	3	2	1	3	1	2	3	1	1	162.0	60.0	78.0	22.8624	124	62	12	5.6	0.03	4.4	1.61	1.3	1.27	0	5.6	0.318	1.73	1.61	0	0.03	21.62	0.68	1.3	0	4.4	\N	\N	1.27	1964-06-14 00:00:00	王平	510702196406143115
0	897	1	3	3	106308260025	51062319630306631X	1	50	3	3	3	1	3	1	1	1	1	1	153.0	46.0	67.5	19.6506	120	74	15	26.99	419.13	498.32	8.91	9.31	8.52	0	26.99	0.326	0.54	8.91	0	419.13	0.318	0.52	9.31	0.01	498.32	\N	\N	8.52	1963-03-06 00:00:00	唐红贵	51062319630306631X
0	898	1	3	1	106308210017	510702196110103122	2	51	3	3	3	1	3	1	1	1	1	1	155.0	70.0	98.0	29.1363	132	92	89	23.6	95.69	\N	9.49	9.47	\N	0	23.6	0.329	0.41	9.49	0	95.69	0.317	0.34	9.47	\N	\N	\N	\N	\N	1961-10-10 00:00:00	张旭芳	510702196110103122
0	900	1	3	1	106308260068	510721197203270847	2	41	2	2	2	1	3	1	1	1	1	1	155.0	53.0	77.0	22.0604	112	68	19	0.03	906.89	\N	0.08	0.08	\N	0	0.03	0.326	1.33	0.08	0	906.89	0.273	1.41	0.08	\N	\N	\N	\N	\N	1972-03-27 00:00:00	蒋秀琼	510721197203270847
0	901	1	3	3	106308210016	510721196810120707	2	44	2	2	2	1	3	1	-1	-1	1	1	156.0	54.0	79.0	22.1893	110	68	8	1.55	1001	6.36	9.6	9.97	0.65	0	1.55	0.326	0.05	9.6	0.01	1001	0.346	0.05	9.97	0.01	6.36	\N	\N	0.65	1968-10-12 00:00:00	郝琼秀	510721196810120707
0	902	1	3	1	106308210036	51072119660323084X	2	47	2	3	2	1	3	1	1	1	1	1	165.0	68.0	94.0	24.977	110	68	27	39.04	89.98	\N	3.57	3.08	\N	0	39.04	0.349	1.33	3.57	0	89.98	0.313	1.19	3.08	\N	\N	\N	\N	\N	1966-03-23 00:00:00	唐琼芳	51072119660323084X
0	904	1	3	3	106308220018	510702197207183127	2	41	2	2	2	1	3	3	-1	-1	1	1	160.0	61.0	80.0	23.8281	98	60	14	0.14	238.76	17.88	0.06	0.07	0.08	0	0.14	0.345	1.78	0.06	0	238.76	0.292	1.76	0.07	0.04	17.88	\N	\N	0.08	1972-07-18 00:00:00	谭素蓉	510702197207183127
0	905	1	3	3	106308210019	510702196610083121	2	46	2	3	2	1	3	1	1	1	1	1	170.0	73.0	86.0	25.2595	110	66	20	33.79	1001	192.61	2.63	2.61	3.06	0	33.79	0.346	0.96	2.63	0	1001	0.313	0.77	2.61	0	192.61	\N	\N	3.06	1966-10-08 00:00:00	刘素芳	510702196610083121
0	906	1	3	2	106310180143	510702196004063120	2	53	3	3	3	1	3	3	1	1	1	1	155.0	61.0	77.0	25.3902	133	66	19	4.89	\N	6.25	3.84	\N	3.97	0	4.89	0.326	1.67	3.84	\N	\N	\N	\N	\N	0	6.25	\N	\N	3.97	1960-04-06 00:00:00	刘德碧	510702196004063120
0	907	1	3	3	106311060047	510703198707132423	2	26	1	1	1	1	1	3	1	1	1	1	153.0	55.0	80.0	23.4952	110	52	19	0.03	375.72	4.11	0.14	0.1	0.14	0	0.03	0.321	1.76	0.14	0	375.72	0.351	1.78	0.1	0	4.11	\N	\N	0.14	1987-07-13 00:00:00	谭秋梅	510703198707132423
0	908	1	3	2	106308260042	510703198009182423	2	32	2	2	1	1	2	3	1	1	1	1	164.0	51.0	73.0	18.9619	112	80	28	32.13	\N	37.9	6.45	\N	6.15	0	32.13	0.338	1.56	6.45	\N	\N	\N	\N	\N	0	37.9	\N	\N	6.15	1980-09-18 00:00:00	李蓉	510703198009182423
0	910	1	3	1	106310130001	510703199303222435	1	20	1	1	1	1	2	1	-1	-1	1	1	171.0	75.0	87.0	25.6489	136	80	29	0.05	106.29	\N	0.06	0.06	\N	0	0.05	0.359	1.82	0.06	0	106.29	0.319	2.05	0.06	\N	\N	\N	\N	\N	1993-03-22 00:00:00	刘信	510703199303222435
0	911	1	3	2	106308260077	510702196701153121	2	46	2	3	2	1	3	1	1	1	1	1	158.0	53.5	77.0	21.4309	90	60	15	4.36	\N	42.75	1.57	\N	1.77	0	4.36	0.326	1.46	1.57	\N	\N	\N	\N	\N	0.01	42.75	\N	\N	1.77	1967-01-15 00:00:00	王晓蓉	510702196701153121
0	912	1	3	3	106310160028	510702195410163114	1	59	3	3	3	1	1	3	2	3	1	1	163.0	67.0	76.0	25.2174	120	72	24	9.63	32.32	31.56	2.11	4.77	4.83	0	9.63	0.35	0.12	2.11	0	32.32	0.329	0.32	4.77	0	31.56	\N	\N	4.83	1954-10-16 00:00:00	黄世斌	510702195410163114
0	913	1	3	1	106310290224	510702195406153116	1	59	3	3	3	1	3	3	2	2	1	1	170.0	65.0	80.0	22.4913	200	118	21	9.73	384.82	\N	1.25	2.4	\N	0.02	9.73	0.436	1.48	1.25	0	384.82	0.326	1.34	2.4	\N	\N	\N	\N	\N	1954-06-15 00:00:00	陈尚照	510702195406153116
0	914	1	3	3	106308260063	51070219630101312X	2	50	3	3	3	1	1	3	1	1	1	1	146.0	53.0	82.0	24.864	124	80	16	3.77	1.07	1.48	8.42	9.59	9.53	0.02	3.77	0.37	0.47	8.42	0	1.07	0.31	0.42	9.59	0	1.48	\N	\N	9.53	1963-01-01 00:00:00	毛忠会	51070219630101312X
0	915	1	3	2	106308130029	51070219630718312X	2	50	3	3	3	1	2	3	1	3	1	1	157.0	64.0	81.0	25.9645	110	78	33	1.2	\N	39.74	0.09	\N	0.25	0.04	1.2	0.643	1.74	0.09	\N	\N	\N	\N	\N	0	39.74	\N	\N	0.25	1963-07-18 00:00:00	贺云华	51070219630718312X
0	916	1	3	2	106308260002	510702195604163120	2	57	3	3	3	1	3	1	1	1	2	2	156.0	58.0	84.0	23.833	146	82	19	1.83	\N	4.68	0.34	\N	0.22	0	1.83	0.627	1.61	0.34	\N	\N	\N	\N	\N	0	4.68	\N	\N	0.22	1956-04-16 00:00:00	邓素华	510702195604163120
0	917	1	3	3	106310270119	510703197910242412	1	34	2	2	1	1	2	1	1	1	1	1	166.0	60.0	74.0	21.7738	110	70	34	0.58	178.72	26.2	0.06	0.06	0.12	0	0.58	0.33	1.64	0.06	0	178.72	0.329	1.85	0.06	0	26.2	\N	\N	0.12	1979-10-24 00:00:00	唐龙军	510703197910242412
0	918	1	3	2	106308270014	510702196506013115	1	48	2	3	2	1	1	1	1	3	2	2	165.0	86.0	103.0	31.5886	132	104	24	14.77	\N	61.83	6.36	\N	7.43	0	14.77	0.394	0.71	6.36	\N	\N	\N	\N	\N	0	61.83	\N	\N	7.43	1965-06-01 00:00:00	夏晓林	510702196506013115
0	919	1	3	3	106308270003	510702197105273121	2	42	2	2	2	1	2	1	1	1	1	1	157.0	60.0	81.0	24.3418	102	70	34	1.99	214.27	1001	5.32	6.69	7.35	0	1.99	0.406	0.3	5.32	0	214.27	0.307	0.13	6.69	0	1001	\N	\N	7.35	1971-05-27 00:00:00	曾文蓉	510702197105273121
0	920	1	3	3	106308260028	510702195809083116	1	54	3	3	3	1	1	1	3	3	1	1	163.0	55.0	74.0	20.7008	160	96	24	13.86	1001	386.39	7.52	9.07	8.78	0	13.86	0.652	1.25	7.52	0	1001	0.326	1.37	9.07	0	386.39	\N	\N	8.78	1958-09-08 00:00:00	张道成	510702195809083116
0	923	1	3	3	106310090006	51070219700504353X	1	43	2	2	2	1	3	1	1	1	1	1	165.0	68.0	79.0	24.977	134	64	18	0.93	106.26	1001	5.86	5.76	5.28	0	0.93	0.337	0.72	5.86	0	106.26	0.327	0.87	5.76	0	1001	\N	\N	5.28	1970-05-04 00:00:00	黄大全	51070219700504353X
0	924	1	3	1	106310170106	510702196510063123	2	48	2	3	2	1	1	1	1	1	1	1	148.0	45.0	66.0	20.5442	180	98	37	0	856.37	\N	0.17	0.1	\N	0	0	0.334	1.92	0.17	0	856.37	0.363	2.07	0.1	\N	\N	\N	\N	\N	1965-10-06 00:00:00	林友会	510702196510063123
0	926	1	3	3	106308140014	510702197001053116	1	43	2	2	2	1	3	1	-1	-1	1	1	175.0	65.5	84.0	21.3878	134	80	16	15.5	0.39	46.45	1.63	10.63	1.73	0	15.5	0.343	1.37	1.63	0.33	0.39	0.324	0.01	10.63	0	46.45	\N	\N	1.73	1970-01-05 00:00:00	魏定全	510702197001053116
0	927	1	3	3	106307230013	510702196912303126	2	43	2	2	2	1	1	1	1	1	1	1	155.0	60.0	78.0	24.974	117	76	25	327.51	1001	1001	6.39	6.43	7.05	0	327.51	0.325	0.58	6.39	0	1001	0.384	0.34	6.43	0	1001	\N	\N	7.05	1969-12-30 00:00:00	罗小琼	510702196912303126
0	928	1	3	1	106308220012	510702195902203135	1	54	3	3	3	1	3	1	1	1	1	1	163.0	59.0	84.5	22.2063	110	78	15	0.36	7.89	\N	7.01	6.41	\N	0	0.36	0.332	1.31	7.01	0	7.89	0.339	1.26	6.41	\N	\N	\N	\N	\N	1959-02-20 00:00:00	魏田余	510702195902203135
0	929	1	3	2	106310260224	510704198808222627	2	25	1	1	1	1	3	1	-1	-1	1	1	155.0	40.0	57.0	16.6493	108	60	17	0	\N	406.43	0.11	\N	0.15	0.01	0	0.308	1.61	0.11	\N	\N	\N	\N	\N	0	406.43	\N	\N	0.15	1988-08-22 00:00:00	蔡蓉	510704198808222627
0	930	1	3	3	106308260035	510702197206013142	2	41	2	2	2	1	3	1	1	1	1	1	165.0	68.0	88.0	24.977	170	136	16	0	255.42	20.9	0.17	0.2	0.14	0	0	0.314	1.87	0.17	0	255.42	0.326	1.9	0.2	0	20.9	\N	\N	0.14	1972-06-01 00:00:00	许蓉	510702197206013142
0	931	1	3	3	106310290087	510702197010083157	1	43	2	2	2	1	1	1	1	2	1	1	162.0	61.0	73.0	23.2434	110	78	23	0.14	60.95	11.54	8.63	0.17	8.8	0	0.14	0.275	1.17	8.63	0	60.95	0.311	1.65	0.17	0	11.54	\N	\N	8.8	1970-10-08 00:00:00	刘兴强	510702197010083157
0	932	1	3	3	106308150021	510702196812193118	1	44	2	2	2	1	3	1	-1	-1	1	1	167.0	64.0	78.0	22.9481	98	68	36	0.94	87.16	14.54	4.73	5.02	4.5	0.01	0.94	0.287	0.59	4.73	0	87.16	0.343	0.62	5.02	0.03	14.54	\N	\N	4.5	1968-12-19 00:00:00	唐林平	510702196812193118
0	933	1	3	1	106307220037	519002197509120869	2	37	2	2	2	1	3	1	1	1	1	1	162.0	62.0	80.0	23.6244	92	62	8	0	84.67	\N	8.29	7.96	\N	0	0	0.281	0.34	8.29	0	84.67	0.343	0.49	7.96	\N	\N	\N	\N	\N	1975-09-12 00:00:00	汪继英	519002197509120869
0	934	1	3	2	106309040018	510702197010042961	2	42	2	2	2	1	3	1	1	1	1	1	145.0	51.0	77.0	24.2568	118	78	17	4.18	\N	4.03	3.48	\N	6.59	0	4.18	0.323	4.7	3.48	\N	\N	\N	\N	\N	0	4.03	\N	\N	6.59	1970-10-04 00:00:00	雷小蓉	510702197010042961
0	936	1	3	2	106308260031	510702196511053146	2	47	2	3	2	1	2	1	1	1	1	1	160.0	59.0	78.0	23.0469	106	84	24	2.78	\N	4.01	6.27	\N	7.05	0	2.78	0.288	0.73	6.27	\N	\N	\N	\N	\N	0	4.01	\N	\N	7.05	1965-11-05 00:00:00	陈利琼	510702196511053146
0	938	1	3	3	106308210005	511023197707089684	2	36	2	2	2	1	1	1	1	1	1	1	155.0	45.0	72.0	18.7305	104	62	18	9.28	489.18	124.24	6.38	6.74	6.92	0	9.28	0.312	1.27	6.38	0	489.18	0.314	1.23	6.74	0.01	124.24	\N	\N	6.92	1977-07-08 00:00:00	漆海英	511023197707089684
0	940	1	3	1	106308260015	510702195803023112	1	55	3	3	3	1	1	1	2	1	1	1	155.0	65.0	97.0	27.0552	120	74	48	63.36	713.8	\N	2.65	3.55	\N	0	63.36	0.311	0.28	2.65	0	713.8	0.286	0.46	3.55	\N	\N	\N	\N	\N	1958-03-02 00:00:00	谭加强	510702195803023112
0	941	1	3	3	106308270019	510702197606202831	1	37	2	2	2	1	3	1	1	1	1	1	157.0	63.0	80.0	25.5588	116	76	33	10.45	17.53	20.83	9.07	9.85	9.07	0	10.45	0.302	1.02	9.07	0	17.53	0.301	1.21	9.85	0	20.83	\N	\N	9.07	1976-06-20 00:00:00	张高敏	510702197606202831
0	942	1	3	3	106308020039	510702196303223120	2	50	3	3	3	1	1	1	1	1	1	1	155.0	54.0	84.0	22.4766	110	64	83	41.8	580.23	111.87	0.004	8.85	9.29	0.01	41.8	\N	\N	0.004	0	580.23	0.332	0.99	8.85	0	111.87	\N	\N	9.29	1963-03-22 00:00:00	何顺蓉	510702196303223120
0	945	1	3	3	106308020067	510702195804213129	2	55	3	3	3	1	3	1	1	1	2	2	145.0	55.0	88.0	26.1593	164	82	24	38.7	365.55	105.62	0.014	3.76	4.9	0.01	38.7	\N	\N	0.014	0	365.55	0.313	1.33	3.76	0	105.62	\N	\N	4.9	1958-04-21 00:00:00	何碧淑	510702195804213129
0	946	1	3	2	106307260017	510702196408143127	2	48	2	3	2	1	1	3	1	1	1	1	152.0	55.0	78.0	23.8054	88	60	35	0	\N	2.91	1.81	\N	0.18	0.02	0	\N	\N	1.81	\N	\N	\N	\N	\N	0	2.91	\N	\N	0.18	1964-08-14 00:00:00	苏昌琼	510702196408143127
0	948	1	3	3	106310300196	51078119730613414X	2	40	2	2	2	1	3	3	-1	-1	1	1	155.0	50.0	64.0	20.8117	98	70	114	84.3	267.21	32.6	0.175	1.4	2.07	0.03	84.3	\N	\N	0.175	0	267.21	0.32	1.39	1.4	0	32.6	\N	\N	2.07	1973-06-13 00:00:00	罗开会	51078119730613414X
0	949	1	3	3	106311210001	51070219570301311X	1	56	3	3	3	1	3	3	2	3	1	1	167.0	66.0	86.0	23.6652	140	66	18	0	508.91	4.23	1.77	0.1	0.13	0.02	0	\N	\N	1.77	0	508.91	0.298	1.88	0.1	0	4.23	\N	\N	0.13	1957-03-01 00:00:00	周道元	51070219570301311X
0	951	1	3	1	106310290014	510702196803153130	1	45	2	3	2	1	2	3	-1	-1	1	1	167.0	60.0	76.6	21.5139	136	78	21	12.6	778.05	\N	0.004	10.47	\N	0.01	12.6	\N	\N	0.004	0	778.05	0.323	0.01	10.47	\N	\N	\N	\N	\N	1968-03-15 00:00:00	魏田文	510702196803153130
0	953	1	3	3	106307240036	510723198304213523	2	30	2	2	1	1	3	3	-1	-1	1	1	160.0	72.0	90.0	28.125	110	62	109	0	371.39	10.44	0.004	6.83	6.28	0.01	0	\N	\N	0.004	0	371.39	0.326	1.36	6.83	0	10.44	\N	\N	6.28	1983-04-21 00:00:00	王丹	510723198304213523
0	954	1	3	3	106307260011	510702196306233121	2	50	3	3	3	1	1	3	1	1	2	2	156.0	53.0	80.0	21.7784	154	86	23	10.3	53.39	34.04	0.004	5.96	7.32	0.03	10.3	\N	\N	0.004	0	53.39	0.31	1.33	5.96	0	34.04	\N	\N	7.32	1963-06-23 00:00:00	叶敏	510702196306233121
0	957	1	3	2	106308080115	510702197412223124	2	38	2	2	2	1	1	3	1	1	1	1	150.0	48.5	73.0	21.5556	108	70	14	0	\N	15.54	0.004	\N	7.88	0.01	0	\N	\N	0.004	\N	\N	\N	\N	\N	0	15.54	\N	\N	7.88	1974-12-22 00:00:00	李素英	510702197412223124
0	960	1	3	1	106307250012	510702196504083128	2	48	2	3	2	1	3	3	1	1	1	1	163.0	51.0	75.0	19.1953	135	79	8	0	25.11	\N	0.004	7.94	\N	0.02	0	\N	\N	0.004	0	25.11	0.36	1.27	7.94	\N	\N	\N	\N	\N	1965-04-08 00:00:00	张素蓉	510702196504083128
0	962	1	3	3	106307260032	510702196712263123	2	45	2	3	2	1	1	3	-1	-1	1	1	162.0	70.0	93.0	26.6728	97	62	33	15.3	27.77	14.38	0.092	2.45	3	0.02	15.3	\N	\N	0.092	0	27.77	0.311	1.8	2.45	0	14.38	\N	\N	3	1967-12-26 00:00:00	张素芳	510702196712263123
0	963	1	3	3	106308080017	510922196510158217	1	47	2	3	2	1	3	3	3	3	1	1	162.0	59.0	82.0	22.4813	124	86	57	0	57.29	4.96	0.004	9.42	9.03	0.01	0	\N	\N	0.004	0	57.29	0.344	0.39	9.42	0	4.96	\N	\N	9.03	1965-10-15 00:00:00	罗明亮	510922196510158217
0	965	1	3	1	106310270117	612128197005046147	2	43	2	2	2	1	3	3	-1	-1	1	1	155.0	40.0	64.0	16.6493	102	64	23	0	20.02	\N	1.65	0.18	\N	0.02	0	\N	\N	1.65	0	20.02	0.315	1.97	0.18	\N	\N	\N	\N	\N	1970-05-04 00:00:00	赵麦莉	612128197005046147
0	973	1	3	2	106307300011	510702196605053112	1	47	2	3	2	1	1	3	-1	-1	1	1	155.0	70.0	93.0	29.1363	133	103	56	0	\N	12.48	0.004	\N	6.55	0.01	0	\N	\N	0.004	\N	\N	\N	\N	\N	0	12.48	\N	\N	6.55	1966-05-05 00:00:00	陈长云	510702196605053112
0	974	1	3	3	106307310003	510702195408153128	2	58	3	3	3	1	3	3	1	1	1	1	145.0	42.0	74.0	19.9762	100	54	80	4.53	116.98	45.47	2.63	0.22	2.91	0	4.53	0.314	1.52	2.63	0	116.98	0.334	1.38	0.22	0.03	45.47	\N	\N	2.91	1954-08-15 00:00:00	李玉琼	510702195408153128
0	975	1	3	2	106307310033	510702197707082840	2	36	2	2	2	1	3	3	1	1	1	1	170.0	89.0	100.0	30.7958	108	72	18	5.59	\N	167.51	1.15	\N	0.88	0	5.59	0.488	1.06	1.15	\N	\N	\N	\N	\N	0.01	167.51	\N	\N	0.88	1977-07-08 00:00:00	张胜芬	510702197707082840
0	976	1	3	3	106310270129	510702196512083136	1	47	2	3	2	1	3	3	-1	-1	1	1	165.0	56.0	68.0	20.5693	116	72	20	4	371.71	170.52	9.06	9.04	8.36	0	4	0.31493	1.01	9.06	0	371.71	0.306	0.94	9.04	0	170.52	\N	\N	8.36	1965-12-08 00:00:00	张小华	510702196512083136
0	977	1	3	3	106310270128	510702196803143119	1	45	2	3	2	1	3	3	1	3	1	1	172.0	63.0	75.0	21.2953	116	80	26	69.49	197.15	180.62	8.9	8.7	8.54	0	69.49	0.332	0.75	8.9	0	197.15	0.312	0.69	8.7	0	180.62	\N	\N	8.54	1968-03-14 00:00:00	张明	510702196803143119
0	978	1	3	2	106307300039	510702196508173155	1	47	2	3	2	1	1	3	1	2	1	1	155.0	61.0	86.0	25.3902	107	69	39	13.33	\N	31.52	8.06	\N	9.44	0	13.33	0.356	0.72	8.06	\N	\N	\N	\N	\N	0	31.52	\N	\N	9.44	1965-08-17 00:00:00	刘道奎	510702196508173155
0	979	1	3	1	106310240022	510702196205123134	1	51	3	3	3	1	1	3	2	3	1	1	173.0	85.0	90.0	28.4005	114	64	38	1.11	28.86	\N	4.32	4.98	\N	0	1.11	0.307	1.34	4.32	0	28.86	0.329	1.39	4.98	\N	\N	\N	\N	\N	1962-05-12 00:00:00	李超	510702196205123134
0	980	1	3	1	106308220011	510702195711053146	2	55	3	3	3	1	1	3	1	1	1	1	150.0	41.0	67.0	18.2222	108	58	15	>1000	1001	\N	7.69	7.52	\N	0	>1000	0.331	0.07	7.69	0	1001	0.325	0.1	7.52	\N	\N	\N	\N	\N	1957-11-05 00:00:00	刘天琼	510702195711053146
0	981	1	3	3	106307290049	510721196801020763	2	45	2	3	2	1	1	3	-1	-1	1	1	153.0	62.0	84.0	26.4855	126	84	17	6.98	48.68	15.09	3.12	2.67	3.19	0	6.98	0.347	1.63	3.12	0	48.68	0.284	1.72	2.67	0	15.09	\N	\N	3.19	1968-01-02 00:00:00	王芳琼	510721196801020763
0	982	1	3	1	106308080012	510702197106123125	2	42	2	2	2	1	1	3	-1	-1	1	1	165.0	50.0	68.0	18.3655	138	80	20	2.99	1001	\N	10.83	0.08	\N	0	2.99	0.271	0.01	10.83	0	1001	0.375	1.84	0.08	\N	\N	\N	\N	\N	1971-06-12 00:00:00	刘俊容	510702197106123125
0	983	1	3	3	106311080026	511323198110052150	1	32	2	2	1	1	1	3	1	2	1	1	175.0	62.0	71.0	20.2449	128	70	26	502.34	1001	1001	8.5	9.21	6.39	0	502.34	0.317	0.07	8.5	0	1001	0.325	0.09	9.21	0	1001	\N	\N	6.39	1981-10-05 00:00:00	殷永红	511323198110052150
0	985	1	3	3	106310170061	510702195503203111	1	58	3	3	3	1	1	3	1	3	1	1	162.0	67.0	90.0	25.5296	140	80	23	0.03	72.85	30.82	1.86	1.73	1.29	0	0.03	0.269	1.62	1.86	0	72.85	0.318	1.53	1.73	0	30.82	\N	\N	1.29	1955-03-20 00:00:00	谢兴云	510702195503203111
0	986	1	3	3	106311080008	510702195803213119	1	55	3	3	3	1	1	3	2	3	1	1	140.0	73.0	98.0	37.2449	170	92	59	5.17	12.63	8.3	0.35	0.32	0.39	0	5.17	0.306	1.52	0.35	0	12.63	0.287	1.34	0.32	0	8.3	\N	\N	0.39	1958-03-21 00:00:00	谢兴华	510702195803213119
0	988	1	3	1	106307300019	51070219681105313X	1	44	2	2	2	1	1	3	2	1	1	1	175.0	79.0	97.0	25.7959	125	77	31	0.18	19.46	\N	9.7	10.62	\N	0	0.18	0.298	0.14	9.7	0	19.46	0.312	0.14	10.62	\N	\N	\N	\N	\N	1968-11-05 00:00:00	李先华	51070219681105313X
0	989	1	3	3	106310300028	510727198611302716	1	26	1	1	1	1	3	3	1	2	1	1	160.0	55.0	66.0	21.4844	134	70	20	0	764.16	46.31	0.15	0.14	0.08	0	0	0.3	1.76	0.15	0	764.16	0.308	1.66	0.14	0	46.31	\N	\N	0.08	1986-11-30 00:00:00	罗林	510727198611302716
2	992	1	3	3	106308090014	510703199808202421	2	14	0	0	0	1	2	3	1	1	1	1	167.0	54.0	73.0	19.3625	110	66	10	3.04	174.99	4.62	0.15	0.16	0.15	0	3.04	0.336	1.88	0.15	0	174.99	0.316	1.68	0.16	0	4.62	\N	\N	0.15	1998-08-20 00:00:00	张靖雯	510703199808202421
0	993	1	3	3	106310250061	510721197108160842	2	42	2	2	2	1	1	3	-1	-1	1	1	158.0	52.0	75.0	20.83	112	60	19	0.18	374.23	19.62	0.21	0.19	0.31	0	0.18	0.279	1.59	0.21	0	374.23	0.326	1.84	0.19	0	19.62	\N	\N	0.31	1971-08-16 00:00:00	赵艳	510721197108160842
0	994	1	3	3	106307310042	510702196304143114	1	50	3	3	3	1	3	3	2	3	1	1	168.0	81.0	100.0	28.699	138	86	21	0.78	1.86	1.87	8.82	8.86	8.66	0	0.78	0.298	1.34	8.82	0	1.86	0.302	1.34	8.86	0.01	1.87	\N	\N	8.66	1963-04-14 00:00:00	李弟贵	510702196304143114
0	995	1	3	3	106307310045	510703198903092422	2	24	1	1	1	1	2	3	-1	-1	1	1	160.0	46.0	65.0	17.9687	114	60	27	0.05	1001	321.1	0.14	0.85	0.12	0	0.05	0.3	1.85	0.14	0	1001	0.308	1.51	0.85	0	321.1	\N	\N	0.12	1989-03-09 00:00:00	张欢	510703198903092422
0	998	1	3	3	106307310043	510702197311243118	1	39	2	2	2	1	1	3	1	1	1	1	170.0	60.0	74.0	20.7612	127	70	13	0	1001	850.95	0.12	0.08	0.11	0	0	0.316	1.9	0.12	0	1001	0.344	1.82	0.08	0	850.95	\N	\N	0.11	1973-11-28 00:00:00	黄定平	510702197311243118
0	999	1	3	3	106308140031	510702196203293121	2	51	3	3	3	1	3	3	1	2	1	1	154.0	66.0	92.0	27.8293	116	62	44	2.33	17.39	39.36	6.14	6.54	5.59	0	2.33	0.31	1.17	6.14	0	17.39	0.323	1.04	6.54	0	39.36	\N	\N	5.59	1962-03-29 00:00:00	陈启华	510702196203293121
0	1000	1	3	1	106307300052	510703198712152429	2	25	1	1	1	1	2	3	-1	-1	1	1	157.0	44.0	65.0	17.8506	86	62	23	0	718.77	\N	0.08	0.09	\N	0	0	0.3012	1.74	0.08	0	718.77	0.376	1.82	0.09	\N	\N	\N	\N	\N	1987-12-15 00:00:00	刘洋	510703198712152429
0	1003	1	3	3	106307300056	510702195408123113	1	58	3	3	3	1	1	3	2	3	1	1	163.0	74.0	89.0	27.852	144	89	18	4.32	59.3	4.19	0.1	0.1	0.15	0	4.32	0.31	1.75	0.1	0	59.3	0.302	1.69	0.1	0	4.19	\N	\N	0.15	1954-08-12 00:00:00	郑成元	510702195408123113
0	1004	1	3	3	106307310014	51070219780907282X	2	34	2	2	1	1	3	3	-1	-1	1	1	156.0	62.0	83.0	25.4767	106	60	47	62.54	1001	835.01	0.19	0.19	0.16	0	62.54	0.298	1.95	0.19	0	1001	0.331	0.89	0.19	0	835.01	\N	\N	0.16	1978-09-07 00:00:00	杨小棠	51070219780907282X
0	1005	1	3	3	106307310055	510702196404133124	2	49	2	3	2	1	3	3	1	1	1	1	157.0	72.0	100.0	29.2101	118	82	65	0.31	1001	5.86	5.3	2.4	5.22	0	0.31	0.302	1.45	5.3	0	1001	0.318	1.55	2.4	0.01	5.86	\N	\N	5.22	1964-04-13 00:00:00	李琼英	510702196404133124
0	1006	1	3	2	106307300035	510781197710040743	2	35	2	2	2	1	3	3	1	1	1	1	165.0	67.0	87.0	24.6097	100	67	20	0.06	\N	2.1	0.08	\N	0.15	0	0.06	0.296	1.85	0.08	\N	\N	\N	\N	\N	0	2.1	\N	\N	0.15	1977-10-04 00:00:00	王光蓉	510781197710040743
0	1007	1	3	3	106307300043	510702197409242818	1	38	2	2	2	1	3	3	2	2	1	1	165.0	50.0	67.0	18.3655	110	70	7	1.23	228.79	409.57	5.5	5.99	5.71	0	1.23	0.303	1.52	5.5	0	228.79	0.293	1.34	5.99	0	409.57	\N	\N	5.71	1974-09-24 00:00:00	蒋胜军	510702197409242818
0	1008	1	3	3	106307290042	510702197310293113	1	39	2	2	2	1	1	3	2	2	1	1	153.0	62.0	83.0	26.4855	123	77	50	10.12	121.9	11.65	0.2	0.3	0.23	0	10.12	0.284	1.98	0.2	0	121.9	0.304	1.79	0.3	0	11.65	\N	\N	0.23	1973-10-29 00:00:00	杨建松	510702197310293113
2	1011	1	3	3	106307290078	510703199810022411	1	14	0	0	0	1	3	3	1	1	1	1	162.0	58.0	77.0	22.1003	106	68	15	0.31	72.66	7.59		0.11	0.12	0	0.31	0.302	1.86		0	72.66	0.306	1.89	0.11	0	7.59	\N	\N	0.12	1998-10-02 00:00:00	周鑫	510703199810022411
0	1012	1	3	3	106311090050	510727197612241420	2	36	2	2	2	1	3	3	1	1	1	1	147.0	53.0	73.0	24.5268	116	74	29	0.22	289.76	10.12	0.08	0.08	0.1	0	0.22	0.319	1.9	0.08	0	289.76	0.325	1.73	0.08	0	10.12	\N	\N	0.1	1976-12-24 00:00:00	郭平艳	510727197612241420
0	1013	1	3	3	106307310060	510702196202073127	2	51	3	3	3	1	3	3	1	1	1	1	150.0	49.0	80.0	21.7778	120	80	31	5.74	34.59	7.28	4.32	5.36	5.82	0	5.74	0.334	1.42	4.32	0	34.59	0.34	1.33	5.36	0	7.28	\N	\N	5.82	1962-02-07 00:00:00	尹翠芳	510702196202073127
0	1014	1	3	3	106308050040	510702197404212820	2	39	2	2	2	1	3	3	1	1	1	1	150.0	60.0	89.0	26.6667	130	66	29	0.19	659.07	26.91	3.74	3.82	4.55	0	0.19	0.298	0.77	3.74	0	659.07	0.32	0.81	3.82	0	26.91	\N	\N	4.55	1974-04-21 00:00:00	向仕会	510702197404212820
0	1015	1	3	3	106310250057	510702196810303117	1	44	2	2	2	1	1	3	2	1	1	1	165.0	67.0	80.0	24.6097	138	78	29	0.71	48.53	4.75	10.44	10.89	6.09	0	0.71	0.351	0.01	10.44	0	48.53	0.31	0.01	10.89	0.01	4.75	\N	\N	6.09	1968-10-30 00:00:00	李小兵	510702196810303117
0	1016	1	3	1	106310260115	510703199807082413	1	15	1	1	1	1	2	3	1	1	1	1	170.0	67.0	72.0	23.1834	103	77	19	3.24	1001	\N	0.28	0.15	\N	0	3.24	0.363	1.99	0.28	0	1001	0.399	1.77	0.15	\N	\N	\N	\N	\N	1998-07-08 00:00:00	李青隆	510703199807082413
0	1017	1	3	1	106310310086	519002197409250885	2	39	2	2	2	1	2	3	-1	-1	1	1	160.0	60.0	83.0	23.4375	118	68	17	5.17	4.5	\N	10.69	11.27	\N	0	5.17	0.359	0.03	10.69	0	4.5	0.327	0.03	11.27	\N	\N	\N	\N	\N	1974-09-25 00:00:00	颜小花	519002197409250885
0	1018	1	3	3	106308080048	510702196604143124	2	47	2	3	2	1	3	3	1	1	1	1	157.0	80.0	103.0	32.4557	126	70	25	2.32	57.59	14.66	6.53	7.79	6.94	0	2.32	0.363	1.33	6.53	0	57.59	0.325	0.84	7.79	0	14.66	\N	\N	6.94	1966-04-14 00:00:00	龙昌容	510702196604143124
0	1019	1	3	3	106311010001	510821198606113424	2	27	1	1	1	1	2	3	-1	-1	1	1	165.0	61.0	83.0	22.4059	126	70	21	0	1001	363.23	0.11	0.06	0.2	0	0	0.409	1.76	0.11	0	1001	0.306	1.85	0.06	0	363.23	\N	\N	0.2	1986-06-11 00:00:00	赵小林	510821198606113424
0	1020	1	3	1	106307300031	510703199310292423	2	19	1	1	1	1	2	3	1	1	1	1	162.0	44.0	57.0	16.7657	100	58	24	13.57	1001	\N	0.19	0.24	\N	0	13.57	0.329	1.85	0.19	0	1001	0.295	1.74	0.24	\N	\N	\N	\N	\N	1993-10-29 00:00:00	张舒	510703199310292423
0	1021	1	3	3	106307290075	510703198309152410	1	29	1	1	1	1	1	3	1	1	1	1	153.0	58.0	83.0	24.7768	108	62	35	4.08	582.69	19.52	0.07	0.13	0.14	0	4.08	0.37	1.98	0.07	0	582.69	0.303	1.68	0.13	0	19.52	\N	\N	0.14	1983-09-15 00:00:00	龚伟	510703198309152410
0	1022	1	3	2	106307300069	510702196312023139	1	49	2	3	2	1	1	3	1	1	2	2	170.0	79.0	94.0	27.3356	222	146	14	0.56	\N	8.41	0.45	\N	0.4	0	0.56	0.287	1.98	0.45	\N	\N	\N	\N	\N	0	8.41	\N	\N	0.4	1963-12-02 00:00:00	杨斌	510702196312023139
0	1023	1	3	3	106308020049	510702196812053115	1	44	2	2	2	1	2	3	1	1	1	1	157.0	55.0	72.0	22.3133	146	98	26	2.57	599.71	471.71	0.81	0.13	0.77	0	2.57	0.327	1.58	0.81	0	599.71	0.308	1.88	0.13	0	471.71	\N	\N	0.77	1968-12-05 00:00:00	冯学明	510702196812053115
0	1024	1	3	3	106308070086	510921197107048139	1	42	2	2	2	1	1	3	1	3	1	1	165.0	58.0	80.0	21.3039	106	78	48	2.69	123.68	19.86	3.18	3.52	3.63	0	2.69	0.319	0.94	3.18	0	123.68	0.328	0.96	3.52	0	19.86	\N	\N	3.63	1971-07-04 00:00:00	夏小美	510921197107048139
0	1025	1	3	3	106307300033	519002197411050225	2	38	2	2	2	1	3	3	1	2	1	1	155.0	59.0	81.0	24.5578	95	60	11	0.22	253.2	46.43	0.14	9.51	0.18	0	0.22	0.31	1.98	0.14	0	253.2	0.372	0.3	9.51	0	46.43	\N	\N	0.18	1974-11-05 00:00:00	陈菊华	519002197411050225
0	1026	1	3	1	106310140011	510702195612213124	2	56	3	3	3	1	1	3	-1	-1	2	2	157.0	74.0	90.0	30.0215	114	86	22	66.21	51.89	\N	8.07	4.66	\N	0	66.21	0.324	1.25	8.07	0.63	51.89	1.579	1	4.66	\N	\N	\N	\N	\N	1956-12-21 00:00:00	崔光琼	510702195612213124
0	1027	1	3	3	106308080109	510702196103013110	1	52	3	3	3	1	1	1	2	1	1	1	163.0	56.0	76.0	21.0772	120	70	12	1.94	40.93	5.81	7.45	8.25	7.34	0	1.94	0.414	0.45	7.45	0	40.93	0.322	0.4	8.25	0	5.81	\N	\N	7.34	1961-03-01 00:00:00	李双胜	510702196103013110
0	1028	1	3	1	106308120001	510702197602202834	1	37	2	2	2	1	3	1	-1	-1	1	1	168.0	65.0	84.0	23.03	136	80	26	9.94	108.95	\N	6.88	6.04	\N	0	9.94	0.328	0.94	6.88	0	108.95	0.303	0.97	6.04	\N	\N	\N	\N	\N	1976-02-20 00:00:00	黄海峰	510702197602202834
0	1030	1	3	1	106308080011	510702197006153116	1	43	2	2	2	1	1	1	-1	-1	1	1	170.0	69.0	89.0	23.8754	104	64	10	9.14	92.3	\N	1.42	1.7	\N	0	9.14	0.341	1.17	1.42	0	92.3	0.314	1.51	1.7	\N	\N	\N	\N	\N	1970-06-15 00:00:00	凌胜	510702197006153116
0	1031	1	3	1	106308070008	510702195512083123	2	57	3	3	3	1	1	1	1	1	1	1	148.0	51.0	82.0	23.2834	124	66	14	5.378	117.86	\N	5.52	6.12	\N	0	5.378	0.394	1.61	5.52	0	117.86	0.354	1.56	6.12	\N	\N	\N	\N	\N	1955-12-08 00:00:00	谢连碧	510702195512083123
0	1034	1	3	1	106307300048	510702197703233146	2	36	2	2	2	1	1	1	1	1	1	1	157.0	60.0	75.0	24.3418	110	70	32	7.27	57.55	\N	6.85	7.06	\N	0	7.27	0.32	0.32	6.85	0	57.55	0.343	0.37	7.06	\N	\N	\N	\N	\N	1977-03-23 00:00:00	杨清会	510702197703233146
0	1035	1	3	3	106308080014	510722197302185775	1	40	2	2	2	1	3	1	2	3	1	1	167.0	69.0	84.0	24.7409	114	74	36	9.2	45.28	82.48	0.459	8.54	1.71	0.01	9.2	\N	\N	0.459	0	45.28	0.292	1.58	8.54	0	82.48	\N	\N	1.71	1973-02-18 00:00:00	艾尚武	510722197302185775
0	1036	1	3	3	106308070087	510702195608203118	1	56	3	3	3	1	1	1	3	2	1	1	157.0	56.0	78.0	22.719	124	92	24	9.47	17.47	9.91	9.04	8.66	7.83	0	9.47	0.313	0.13	9.04	0	17.47	0.312	0.14	8.66	0	9.91	\N	\N	7.83	1956-08-20 00:00:00	李茂胜	510702195608203118
0	1040	1	3	3	106308080124	510702196206183120	2	51	3	3	3	1	1	3	-1	-1	1	1	150.0	52.0	80.0	23.1111	116	70	38	231.9	79.31	95.55	0.004	8.26	8.23	0.02	231.9	\N	\N	0.004	0	79.31	0.278	1.2	8.26	0	95.55	\N	\N	8.23	1962-06-18 00:00:00	张凤英	510702196206183120
0	1041	1	3	2	106308080031	510721197307050507	2	40	2	2	2	1	3	1	1	1	1	1	163.0	55.0	72.0	20.7008	114	62	13	0	\N	62.67		\N	0.08	0	0				\N	\N	\N	\N	\N	0	62.67	\N	\N	0.08	1973-07-05 00:00:00	高素青	510721197307050507
0	1042	1	3	1	106311070033	510703198502162426	2	28	1	1	1	1	3	1	-1	-1	1	1	158.0	57.0	72.0	22.8329	132	82	25	0	1.28	\N	0.004	9.03	\N	0.03	0	\N	\N	0.004	0	1.28	0.292	0.01	9.03	\N	\N	\N	\N	\N	1985-02-16 00:00:00	魏丽	510703198502162426
0	1043	1	3	1	106307310066	510721196705160707	2	46	2	3	2	1	1	3	1	1	1	1	158.0	55.0	85.0	22.0317	130	84	38	4.8	124.74	\N	0.004	8.56	\N	0.02	4.8	\N	\N	0.004	0	124.74	0.346	0.94	8.56	\N	\N	\N	\N	\N	1967-05-16 00:00:00	李玉琼	510721196705160707
0	1044	1	3	1	106312280004	510702196712073135	1	46	2	3	2	1	3	3	2	3	1	1	167.0	75.0	93.0	26.8923	152	78	34	0.12	414.09	\N	0.23	0.14	\N	0	0.12	0.32	1.77	0.23	0	414.09	0.318	1.6	0.14	\N	\N	\N	\N	\N	1967-12-07 00:00:00	刘喜文	510702196712073135
0	1045	1	3	3	106308150038	510703198712202430	1	25	1	1	1	1	3	3	2	2	1	1	168.0	62.0	63.0	21.9671	138	78	17	1.2	1001	564.04	8.48	8.99	6.54	0	1.2	0.351	0.08	8.48	0	1001	0.327	0.25	8.99	0.14	564.04	\N	\N	6.54	1987-12-20 00:00:00	刘学东	510703198712202430
0	1048	1	3	1	106310240054	510703199308152421	2	20	1	1	1	1	2	1	-1	-1	1	1	165.0	49.0	64.0	17.9982	92	70	28	0.957	1001	\N	1.82	0.15	\N	0	0.957	0.349	1.82	1.82	0	1001	0.353	1.85	0.15	\N	\N	\N	\N	\N	1993-08-15 00:00:00	魏依伶	510703199308152421
0	1051	1	3	3	106308070084	510703198611042415	1	26	1	1	1	1	2	1	1	1	1	1	170.0	75.0	90.0	25.9516	132	84	86	0	164.81	17.88	0.34	0.09	0.15	0	0	0.319	1.97	0.34	0	164.81	0.317	2.02	0.09	0	17.88	\N	\N	0.15	1986-11-04 00:00:00	张国	510703198611042415
0	1052	1	3	3	106308090047	510703199410302422	2	18	1	1	1	1	2	1	-1	-1	1	1	157.0	47.5	69.4	19.2706	100	66	9	2.6	240.93	3.48	1	0.12	0.12	0	2.6	0.402	2	1	0	240.93	0.321	1.81	0.12	0	3.48	\N	\N	0.12	1994-10-30 00:00:00	黄婷	510703199410302422
0	1054	1	3	1	106308070096	510702197205053118	1	41	2	2	2	1	2	1	2	3	1	1	173.0	78.0	91.0	26.0617	124	96	58	5.94	1001	\N	3.43	4.43	\N	0	5.94	0.334	1.54	3.43	0	1001	0.347	1.46	4.43	\N	\N	\N	\N	\N	1972-05-05 00:00:00	刘喜亮	510702197205053118
0	1055	1	3	2	106308080126	510703198209112411	1	30	2	2	1	1	3	1	-1	-1	1	1	167.0	66.0	79.0	23.6652	126	74	110	0.92	\N	2.34	1.6	\N	6.29	0	0.92	1.62	1.62	1.6	\N	\N	\N	\N	\N	0	2.34	\N	\N	6.29	1982-09-11 00:00:00	李克红	510703198209112411
2	1056	1	3	1	106309120125	51132419981226540X	2	14	0	0	0	1	2	1	1	1	1	1	155.0	42.0	57.0	17.4818	112	68	11	40.09	1001	\N	0.07	0.08	\N	0.01	40.09	0.33	1.63	0.07	0	1001	0.327	1.83	0.08	\N	\N	\N	\N	\N	1998-12-26 00:00:00	龙俊宏	51132419981226540X
2	1057	1	3	1	106309120128	510703199812072420	2	14	0	0	0	1	3	3	-1	-1	1	1	165.0	73.0	86.0	26.8136	110	70	9	0	897.58	\N	1.77	0.09	\N	0.02	0	\N	\N	1.77	0	897.58	0.328	1.8	0.09	\N	\N	\N	\N	\N	1998-12-07 00:00:00	姜茹梦	510703199812072420
2	1060	1	3	1	106309120157	510703199810262415	1	14	0	0	0	1	2	3	-1	-1	1	1	179.5	54.0	62.0	16.7596	106	66	10	2.14	198.22	\N	0.09	0.08	\N	0.04	2.14	0.528	1.79	0.09	0	198.22	0.33	2.17	0.08	\N	\N	\N	\N	\N	1998-10-26 00:00:00	李茂源	510703199810262415
2	1061	1	3	1	106309120158	510902199812276364	2	14	0	0	0	1	2	3	-1	-1	1	1	166.0	45.0	60.0	16.3304	110	64	6	13.79	417.04	\N	0.19	0.11	\N	0.01	13.79	0.334	1.71	0.19	0	417.04	0.343	1.71	0.11	\N	\N	\N	\N	\N	1998-12-27 00:00:00	周晓娅	510902199812276364
0	1063	1	3	1	106309120166	510703199710262418	1	15	1	1	1	1	2	3	1	1	1	1	172.0	49.0	65.0	16.563	120	80	20	3.09	1001	\N	0.09	0.07	\N	0.02	3.09	0.456	1.66	0.09	0	1001	0.34	1.79	0.07	\N	\N	\N	\N	\N	1997-10-26 00:00:00	陈毅	510703199710262418
0	1066	1	3	1	106309120127	342626199609204167	2	16	1	1	1	1	2	3	-1	-1	1	1	150.0	49.0	66.0	21.7778	104	66	30	0	1001	\N	0.18	0.14	\N	0	0	0.277	1.72	0.18	0	1001	0.337	1.78	0.14	\N	\N	\N	\N	\N	1996-09-20 00:00:00	鲁汉琴	342626199609204167
0	1070	1	3	1	106310200002	510702197502043119	1	38	2	2	2	1	1	3	2	2	1	1	175.0	96.0	100.0	31.3469	118	76	37	0.22	1.49	\N	9.84	10.19	\N	0.03	0.22	0.542	0.01	9.84	0	1.49	0.301	0.01	10.19	\N	\N	\N	\N	\N	1975-02-04 00:00:00	肖远斌	510702197502043119
0	1071	1	3	1	106310160110	510702196304203121	2	50	3	3	3	1	1	1	1	1	1	1	158.0	64.0	85.0	25.6369	120	90	22	6.8	42.72	\N	5.05	5.49	\N	0	6.8	0.312	1.51	5.05	0	42.72	0.32	1.46	5.49	\N	\N	\N	\N	\N	1963-04-20 00:00:00	赵全容	510702196304203121
0	1072	1	3	1	106310250021	51070219660729311X	1	47	2	3	2	1	2	3	2	1	1	1	154.0	50.0	63.0	21.0828	130	80	44	0	1001	\N	0.2	0.09	\N	0	0	0.281	1.55	0.2	0	1001	0.301	1.96	0.09	\N	\N	\N	\N	\N	1966-07-29 00:00:00	刘刚	51070219660729311X
0	1075	1	3	3	106307260013	510703197902212424	2	34	2	2	1	1	1	3	1	1	1	1	150.0	49.0	75.0	21.7778	110	68	11	0.04	496.76	20.28	0.09	0.11	0.11	0	0.04	2.98	1.82	0.09	0	496.76	0.351	1.72	0.11	0	20.28	\N	\N	0.11	1979-02-21 00:00:00	魏玲	510703197902212424
0	1076	1	3	3	106308050016	510702195411263125	2	58	3	3	3	1	1	3	-1	-1	1	1	155.0	68.0	97.0	28.3039	142	78	53	7.2	211.65	32.66	0.038	8.39	4.87	0.03	7.2	\N	\N	0.038	0	211.65	0.334	1.3	8.39	0	32.66	\N	\N	4.87	1954-11-26 00:00:00	陈惠英	510702195411263125
0	1077	1	3	3	106308050023	519002197501020847	2	38	2	2	2	1	2	3	-1	-1	1	1	165.0	65.0	84.0	23.8751	104	64	10	0	64.9	1.46	0.08	0.11	0.12	0	0	0.317	1.78	0.08	0	64.9	0.327	1.88	0.11	0	1.46	\N	\N	0.12	1975-01-02 00:00:00	李小平	519002197501020847
0	1078	1	3	3	106308050025	510703199504182425	2	18	1	1	1	1	2	3	-1	-1	1	1	160.0	50.0	66.0	19.5312	108	64	12	1.9	1001	754.55	0.16	0.12	0.08	0	1.9	0.297	1.82	0.16	0	1001	0.318	1.95	0.12	0	754.55	\N	\N	0.08	1995-04-18 00:00:00	张春	510703199504182425
0	1079	1	3	1	106310290096	51070319820926241X	1	31	2	2	1	1	2	3	-1	-1	1	1	168.0	42.0	60.0	14.881	114	74	23	16.48	1001	\N	0.06	1.81	\N	0	16.48	0.318	1.84	0.06	0	1001	0.334	0.06	1.81	\N	\N	\N	\N	\N	1982-09-26 00:00:00	魏兵	51070319820926241X
0	1080	1	3	3	106310160112	510702196505193134	1	48	2	3	2	1	1	3	-1	-1	1	1	165.0	55.0	80.0	20.202	130	60	23	11.77	807.37	109.03	1.85	2.15	3.52	0	11.77	0.311	1.85	1.85	0	807.37	0.387	1.94	2.15	0	109.03	\N	\N	3.52	1965-05-19 00:00:00	张茂良	510702196505193134
0	1081	1	3	1	106310270217	510703198311202413	1	29	1	1	1	1	2	3	1	1	1	1	167.0	69.0	78.0	24.7409	116	70	60	1.16	85.19	\N	0.16	0.09	\N	0	1.16	0.297	1.87	0.16	0	85.19	0.346	1.79	0.09	\N	\N	\N	\N	\N	1983-11-20 00:00:00	魏兴龙	510703198311202413
0	1082	1	3	1	106310300019	510703199705142438	1	16	1	1	1	1	2	3	-1	-1	1	1	173.0	59.0	68.0	19.7133	122	60	14	7.74	481.63	\N	0.09	0.14	\N	0	7.74	0.297	1.72	0.09	0	481.63	0.33	1.84	0.14	\N	\N	\N	\N	\N	1997-05-14 00:00:00	陈龙	510703199705142438
0	1083	1	3	3	106308060062	510702195805163127	2	55	3	3	3	1	1	3	1	1	3	3	163.0	51.0	80.0	19.1953	138	80	59	2.42	76.04	9.58	0.77	0.62	0.76	0	2.42	0.31	1.49	0.77	0	76.04	0.351	1.64	0.62	0	9.58	\N	\N	0.76	1958-05-16 00:00:00	何在英	510702195805163127
0	1086	1	3	1	106310300011	51082119760522681X	1	37	2	2	2	1	3	3	-1	-1	1	1	167.0	80.0	90.0	28.6851	134	86	69	0.11	365.08	\N	0.09	0.18	\N	0	0.11	0.298	1.91	0.09	0	365.08	0.301	1.79	0.18	\N	\N	\N	\N	\N	1976-05-22 00:00:00	刘维聪	51082119760522681X
0	1088	1	3	1	106311090035	510703198206162413	1	31	2	2	1	1	2	3	-1	-1	1	1	170.0	75.0	80.0	25.9516	128	80	49	0	4.03	\N	0.27	0.14	\N	0	0	0.316	1.96	0.27	0	4.03	0.318	2.032	0.14	\N	\N	\N	\N	\N	1982-06-16 00:00:00	李伦军	510703198206162413
0	1089	1	3	3	106309120015	510702196508103130	2	48	2	3	2	1	3	3	-1	-1	1	1	163	58	74	21.83	122	75	19	16.32	90.73	389.09	8.64	8.86	0.53	0	16.32	0.304	0.7	8.64	0	90.73	0.319	0.64	8.86	0	389.09	\N	\N	0.53	1965-08-10 00:00:00	张世清	510702196508103130
0	1090	1	3	3	106310090005	510702196211103148	2	50	3	3	3	1	3	3	1	3	1	1	150.0	60.0	88.0	26.6667	122	70	3	1.32	61.54	32.85	0.17	0.12	0.26	0	1.32	0.377	2	0.17	0	61.54	0.368	1.96	0.12	0	32.85	\N	\N	0.26	1962-11-10 00:00:00	吴怀碧	510702196211103148
0	1091	1	3	3	106309020038	510702196801093111	1	45	2	3	2	1	3	3	1	1	1	1	158.0	61.0	77.0	24.4352	106	70	38	0.04	1001	700.17	0.13	0.13	0.21	0	0.04	0.33	1.84	0.13	0	1001	0.366	1.8	0.13	0	700.17	\N	\N	0.21	1968-01-09 00:00:00	肖林	510702196801093111
0	1092	1	3	1	106310300136	510129198412037526	2	28	1	1	1	1	3	3	-1	-1	1	1	167.0	80.0	57.0	28.6851	102	64	28	0.16	1001	\N	0.11	0.09	\N	0	0.16	0.334	1.8	0.11	0	1001	0.314	1.83	0.09	\N	\N	\N	\N	\N	1984-12-03 00:00:00	杨梅	510129198412037526
0	1093	1	3	1	106308050019	510702196712043120	2	45	2	3	2	1	2	3	1	2	1	1	155.0	61.0	82.0	25.3902	114	74	17	1.76	339.02	\N	7.33	7.5	\N	0	1.76	0.343	1.43	7.33	0	339.02	0.281	1.36	7.5	\N	\N	\N	\N	\N	1967-12-04 00:00:00	许前秀	510702196712043120
0	1094	1	3	1	106310260184	510702197301253128	2	40	2	2	2	1	1	3	1	1	1	1	158.0	48.0	76.0	19.2277	103	75	20	0	78.02	\N	0.13	0.14	\N	0	0	0.369	1.81	0.13	0	78.02	0.366	1.79	0.14	\N	\N	\N	\N	\N	1973-01-25 00:00:00	魏兴碧	510702197301253128
0	1095	1	3	1	106308300042	510702196708043128	2	46	2	3	2	1	3	3	-1	-1	1	1	163.0	53.0	73.0	19.9481	100	50	13	2.41	137.62	\N	8.41	8.29	\N	0	2.41	0.355	1.13	8.41	0	137.62	0.275	1.06	8.29	\N	\N	\N	\N	\N	1967-08-04 00:00:00	曹玉琼	510702196708043128
0	1096	1	3	1	106310260271	510702197109303113	1	42	2	2	2	1	2	3	-1	-1	1	1	172.0	71.0	92.0	23.9995	116	72	26	0	190.5	\N	0.04	0.05	\N	0.01	0	0.3296	2.04	0.04	0	190.5	0.289	1.94	0.05	\N	\N	\N	\N	\N	1971-09-30 00:00:00	魏兵	510702197109303113
0	1097	1	3	3	106308300009	510702196512063127	2	47	2	3	2	1	3	3	1	1	2	2	163.0	54.0	72.0	20.3244	116	66	19	12.71	1001	121.58	3.14	3.34	3.19	0	12.71	0.385	0.3	3.14	0.02	1001	0.341	0.25	3.34	0	121.58	\N	\N	3.19	1965-12-06 00:00:00	李秀明	510702196512063127
0	1098	1	3	1	106308300010	510703198802042426	2	25	1	1	1	1	3	3	1	1	1	1	164.0	44.0	66.0	16.3593	114	64	13	0.17	1001	\N	0.15	0.1	\N	0	0.17	0.339	1.66	0.15	0	1001	0.333	1.58	0.1	\N	\N	\N	\N	\N	1988-02-04 00:00:00	曹金凤	510703198802042426
0	1101	1	3	3	106310260235	510702197603023125	2	37	2	2	2	1	2	3	-1	-1	1	1	160.0	50.0	72.0	19.5312	100	74	21	0	368.56	2.5	0.1	0.1	0.13	0	0	0.296	1.65	0.1	0	368.56	0.46	1.72	0.1	0	2.5	\N	\N	0.13	1976-03-02 00:00:00	魏芳	510702197603023125
0	1102	1	3	1	106308290051	510702196910193111	1	43	2	2	2	1	3	3	1	2	1	1	160.0	60.0	79.0	23.4375	170	106	24	0.8	800.32	\N	0.07	0.08	\N	0.01	0.8	0.351	1.74	0.07	0	800.32	0.322	1.8	0.08	\N	\N	\N	\N	\N	1969-10-19 00:00:00	刘成旭	510702196910193111
0	1103	1	3	3	106308300072	510702196704293146	2	46	2	3	2	1	3	3	-1	-1	1	1	153.0	46.0	75.0	19.6506	114	82	25	0	970.33	171.45	1.39	0.33	0.19	0.02	0	\N	\N	1.39	0	970.33	0.315	1.71	0.33	0	171.45	\N	\N	0.19	1967-04-29 00:00:00	李贤秀	510702196704293146
0	1104	1	3	1	106310270081	510703198610102463	2	27	1	1	1	1	1	3	-1	-1	1	1	158.0	58.0	70.0	23.2335	120	78	13	20.15	855.04	\N	9.15	9.78	\N	0	20.15	0.315	0.03	9.15	0	855.04	0.342	0.02	9.78	\N	\N	\N	\N	\N	1986-10-10 00:00:00	邹晓艳	510703198610102463
0	1105	1	3	3	106310200191	510702197106203125	2	42	2	2	2	1	1	3	-1	-1	1	1	165.0	55.0	62.0	20.202	11	76	14	3.08	281.11	42.49	8.81	9.2	8.46	0	3.08	0.34	0.06	8.81	0	281.11	0.334	0.05	9.2	0	42.49	\N	\N	8.46	1971-06-20 00:00:00	肖燕	510702197106203125
0	1107	1	3	1	106308060039	510702196411013120	2	48	2	3	2	1	2	3	-1	-1	1	1	160.0	58.0	81.0	22.6562	112	70	21	6.41	193.64	\N	5.2	6.24	\N	0	6.41	0.27	1.34	5.2	0	193.64	0.369	1.29	6.24	\N	\N	\N	\N	\N	1964-11-01 00:00:00	徐桂兰	510702196411013120
0	1111	1	3	1	106310300204	510702196408023117	1	49	2	3	2	1	1	3	1	1	1	1	153.0	45.0	62.0	19.2234	128	76	15	14.56	1001	\N	5.38	5.44	\N	0	14.56	0.311	0.77	5.38	0	1001	0.473	0.61	5.44	\N	\N	\N	\N	\N	1964-08-02 00:00:00	刘小辉	510702196408023117
0	1112	1	3	3	106308050055	519002197503040841	2	38	2	2	2	1	2	3	1	2	1	1	160.0	57.0	74.0	22.2656	116	70	52	8.94	1001	250.83	8.15	9.23	7.66	0	8.94	0.293	0.43	8.15	0	1001	0.325	0.53	9.23	0	250.83	\N	\N	7.66	1975-03-04 00:00:00	赵伟	519002197503040841
0	1114	1	3	1	106310310082	510702197310163116	1	40	2	2	2	1	1	3	-1	-1	1	1	175.0	82.0	94.0	26.7755	120	74	60	5.46	647.86	\N	0.1	0.11	\N	0	5.46	0.299	1.54	0.1	0	647.86	0.301	1.56	0.11	\N	\N	\N	\N	\N	1973-10-16 00:00:00	魏道刚	510702197310163116
0	1115	1	3	3	106311060098	510703198709072444	2	26	1	1	1	1	2	3	1	1	1	1	153.0	40.0	60.0	17.0874	112	60	16	0	852.96	336.32	1.73	0.11	0.13	0	0	0.32	0.32	1.73	0	852.96	0.32	1.76	0.11	0	336.32	\N	\N	0.13	1987-09-07 00:00:00	罗茜	510703198709072444
0	1116	1	3	3	106308070074	510702197803102821	2	35	2	2	2	1	1	3	1	1	1	1	158.0	56.0	70.0	22.4323	108	56	14	0.12	8.11	7.49	0.09	11.3	0.11	0	0.12	0.337	1.44	0.09	0	8.11	0.322	0.02	11.3	0	7.49	\N	\N	0.11	1978-03-10 00:00:00	李红梅	510702197803102821
0	1119	1	3	3	106308060053	51070219650823312X	2	47	2	3	2	1	1	3	-1	-1	1	1	150.0	52.0	73.0	23.1111	114	74	35	0	1.06	6.17	8.68	8.95	8.59	0	0	0.282	0.16	8.68	0	1.06	0.349	0.17	8.95	0	6.17	\N	\N	8.59	1965-08-23 00:00:00	刘太秀	51070219650823312X
0	1121	1	3	1	106309020014	510703198803092417	1	25	1	1	1	1	3	3	-1	-1	1	1	155.0	46.0	70.0	19.1467	120	74	15	0	73.47	\N	0.35	0.35	\N	0	0	0.319	1.74	0.35	0.01	73.47	0.393	1.66	0.35	\N	\N	\N	\N	\N	1988-03-09 00:00:00	李园彪	510703198803092417
0	1122	1	3	1	106308300029	510703198908292415	1	24	1	1	1	1	2	3	-1	-1	1	1	165.0	76.0	92.0	27.9155	146	96	175	0.16	5.25	\N	0.16	0.15	\N	0	0.16	0.309	1.77	0.16	0	5.25	0.473	1.67	0.15	\N	\N	\N	\N	\N	1989-08-29 00:00:00	肖李	510703198908292415
0	1124	1	3	1	106310190042	510702195407123111	1	59	3	3	3	1	1	3	-1	-1	1	1	155.0	62.0	72.0	25.8065	176	98	44	4.66	127.14	\N	9.28	8.85	\N	0	4.66	0.288	0.44	9.28	0	127.14	0.479	0	8.85	\N	\N	\N	\N	\N	1954-07-12 00:00:00	肖永泽	510702195407123111
0	1126	1	3	1	106310140033	510702196602103129	2	47	2	3	2	1	1	3	1	1	1	1	160.0	60.0	68.0	23.4375	162	92	42	0	107.13	\N	0.11	0.18	\N	0	0	0.319	1.81	0.11	0	107.13	0.321	1.81	0.18	\N	\N	\N	\N	\N	1966-02-10 00:00:00	魏秀琼	510702196602103129
0	1127	1	3	1	106309110025	510703198705252413	1	26	1	1	1	1	3	3	2	1	1	1	170.0	60.0	65.0	20.7612	118	66	25	0	105.88	\N	0.18	0.06	\N	0	0	0.308	1.9	0.18	0	105.88	0.341	1.9	0.06	\N	\N	\N	\N	\N	1987-05-25 00:00:00	李建	510703198705252413
0	1128	1	3	1	106311280006	510702195811263124	2	55	3	3	3	1	1	3	1	1	1	1	154.0	54.0	75.0	22.7694	144	96	18	0	368.53	\N	0.27	0.11	\N	0	0	1.953	1.5	0.27	0	368.53	0.349	1.72	0.11	\N	\N	\N	\N	\N	1958-11-26 00:00:00	罗玉琼	510702195811263124
0	1129	1	3	1	106311050052	510726198404041211	1	29	1	1	1	2	1	3	1	2	1	1	160.0	75.0	85.0	29.2969	128	82	211	0	11.51	\N	0.13	0.11	\N	0	0	0.297	2	0.13	0	11.51	0.275	1.91	0.11	\N	\N	\N	\N	\N	1984-04-04 00:00:00	唐真富	510726198404041211
0	1134	1	3	1	106311050053	510703199105192423	2	22	1	1	1	1	1	3	-1	-1	1	1	163.0	45.0	60.0	16.937	124	64	38	0.1	339.85	\N	0.16	0.1	\N	0	0.1	0.307	1.66	0.16	0	339.85	0.304	1.69	0.1	\N	\N	\N	\N	\N	1991-05-19 00:00:00	何小清	510703199105192423
0	1135	1	3	3	106310300082	510702197408052836	1	39	2	2	2	1	2	3	2	2	1	1	167.0	73.0	88.0	26.1752	120	76	57	0.9	314.55	59.75	1.2	1.04	0.96	0	0.9	0.309	1.63	1.2	0	314.55	0.3	1.56	1.04	0	59.75	\N	\N	0.96	1974-08-05 00:00:00	刘刚	510702197408052836
0	1136	1	3	1	106308150050	510703199009132420	2	22	1	1	1	1	2	3	1	1	1	1	162.0	45.0	70.0	17.1468	116	52	34	0.02	1001	\N	0.08	0.13	\N	0	0.02	0.355	1.83	0.08	0	1001	0.333	1.77	0.13	\N	\N	\N	\N	\N	1990-09-13 00:00:00	蒋婷婷	510703199009132420
0	1137	1	3	2	106308300041	510702196808163119	1	45	2	3	2	1	3	3	-1	-1	1	1	156.0	51.0	70.0	20.9566	128	86	18	1.22	\N	6.28	0.12	\N	0.15	0	1.22	0.323	1.92	0.12	\N	\N	\N	\N	\N	0	6.28	\N	\N	0.15	1968-08-16 00:00:00	刘文军	510702196808163119
0	1140	1	3	1	106310270147	51070219570823312X	2	56	3	3	3	1	3	3	1	1	2	2	145.0	38.0	61.0	18.0737	122	82	16	4.18	757.96	\N	4.53	3.72	\N	0	4.18	0.338	1.76	4.53	0	757.96	0.385	1.79	3.72	\N	\N	\N	\N	\N	1957-08-23 00:00:00	柏琼兰	51070219570823312X
0	1141	1	3	2	106309110050	510704197808090025	2	35	2	2	2	1	3	3	1	1	1	1	142.0	44.0	62.0	21.8211	118	64	21	0	\N	38.12	0.14	\N	0.1	0	0	0.368	1.66	0.14	\N	\N	\N	\N	\N	0	38.12	\N	\N	0.1	1978-08-09 00:00:00	许红梅	510704197808090025
0	1142	1	3	2	106308300084	510702196207283131	1	51	3	3	3	1	1	3	1	3	1	1	165.0	86.0	104.0	31.5886	164	88	33	0	\N	1.8	0.13	\N	0.13	0	0	0.326	1.79	0.13	\N	\N	\N	\N	\N	0	1.8	\N	\N	0.13	1962-07-28 00:00:00	肖太宪	510702196207283131
0	1144	1	3	1	106309020026	510781197801067204	2	35	2	2	2	1	2	3	-1	-1	1	1	157.0	55.0	80.0	22.3133	124	72	26	0	1001	\N	0.09	0.14	\N	0	0	0.357	1.95	0.09	0	1001	0.319	1.73	0.14	\N	\N	\N	\N	\N	1978-01-06 00:00:00	罗蓉	510781197801067204
0	1145	1	3	3	106309020052	510721197001230847	2	43	2	2	2	1	3	3	1	1	1	1	145.0	50.0	75.0	23.7812	126	78	20	7.89	58.01	52.91	10.6	10.65	10.06	0	7.89	0.339	0.1	10.6	0	58.01	0.306	0.01	10.65	0	52.91	\N	\N	10.06	1970-01-23 00:00:00	谢玉兰	510721197001230847
0	1146	1	3	1	106308290014	51070219660307311X	1	47	2	3	2	1	1	3	1	1	1	1	165.0	55.0	77.0	20.202	112	76	29	8.55	10.43	\N	9.43	9.97	\N	0	8.55	0.349	1.07	9.43	0	10.43	0.374	1.13	9.97	\N	\N	\N	\N	\N	1966-03-07 00:00:00	刘崇明	51070219660307311X
0	1153	1	3	2	106307300042	510702196310233124	2	49	2	3	2	1	3	3	1	3	1	1	155.0	67.0	90.0	27.8876	109	60	22	10.83	\N	140.78	6.47	\N	6.5	0	10.83	0.334	1.26	6.47	\N	\N	\N	\N	\N	0	140.78	\N	\N	6.5	1963-10-23 00:00:00	魏秀蓉	510702196310233124
0	1154	1	3	2	106307290069	510702196303103110	1	50	3	3	3	1	3	3	2	3	2	2	171.0	67.0	90.0	22.913	140	90	26	14	\N	161.29	0.004	\N	5.53	0.03	14	\N	\N	0.004	\N	\N	\N	\N	\N	0	161.29	\N	\N	5.53	1963-03-10 00:00:00	张学斌	510702196303103110
0	1156	1	3	1	106308290033	510702195702013126	2	56	3	3	3	1	1	3	1	1	1	1	152.0	51.0	82.0	22.0741	120	70	21	0	508.02	\N	0.09	0.08	\N	0	0	0.308	1.9	0.09	0	508.02	0.296	1.85	0.08	\N	\N	\N	\N	\N	1957-02-01 00:00:00	肖太玉	510702195702013126
0	1158	1	3	3	106309060048	510702197201123123	2	41	2	2	2	1	3	3	1	1	1	1	163.0	66.0	78.0	24.841	116	58	13	0	1001	249.57	0.25	1.6	0.11	0	0	0.302	1.87	0.25	0.17	1001	0.303	1.59	1.6	0	249.57	\N	\N	0.11	1972-01-12 00:00:00	魏田芬	510702197201123123
0	1160	1	3	3	106310280052	510703199112062440	2	21	1	1	1	1	2	3	-1	-1	1	1	163.0	6380.0	未查	2401.29	108	60	19	0	65.15	19.81	1.44	0.18	0.16	0.03	0	\N	\N	1.44	0	65.15	0.333	1.75	0.18	0	19.81	\N	\N	0.16	1991-12-06 00:00:00	颜婷婷	510703199112062440
0	1162	1	3	1	106310250121	51070219700202312X	2	43	2	2	2	1	1	3	-1	-1	1	1	162.0	61.0	74.0	23.2434	110	60	15	0	1001	\N	0.09	0.06	\N	0	0	0.314	1.83	0.09	0	1001	0.36	1.88	0.06	\N	\N	\N	\N	\N	1970-02-02 00:00:00	刘英	51070219700202312X
0	1163	1	3	2	106308060064	510722196912173283	2	43	2	2	2	1	1	3	1	1	1	1	158.0	62.0	80.0	24.8358	102	68	24	32.9	\N	1001	5.36	\N	4.07	0	32.9	0.324	1.55	5.36	\N	\N	\N	\N	\N	0	1001	\N	\N	4.07	1969-12-17 00:00:00	冯晓金	510722196912173283
0	1166	1	3	2	106308060040	510702196301243128	2	50	3	3	3	1	1	3	1	1	1	1	157.0	63.0	87.0	25.5588	160	84	27	28.82	\N	47.45	7.03	\N	7.3	0	28.82	0.295	1.2	7.03	\N	\N	\N	\N	\N	0	47.45	\N	\N	7.3	1963-01-24 00:00:00	罗华蓉	510702196301243128
0	1168	1	3	1	106309090033	510721197012120846	2	42	2	2	2	1	1	3	1	1	1	1	153.0	57.0	83.0	24.3496	118	80	14	0	807.19	\N	0.17	0.16	\N	0	0	0.312	1.86	0.17	0	807.19	0.345	1.86	0.16	\N	\N	\N	\N	\N	1970-12-12 00:00:00	杨桂华	510721197012120846
0	1169	1	3	1	106311040035	510702196210273110	1	51	3	3	3	1	1	3	1	1	1	1	163.0	65.0	80.0	24.4646	132	82	29	3.66	38.73	\N	7.58	7.98	\N	0	3.66	0.284	1.45	7.58	0	38.73	0.339	1.57	7.98	\N	\N	\N	\N	\N	1962-10-27 00:00:00	谢贵杰	510702196210273110
0	1171	1	3	1	106308050060	510703199309012439	1	19	1	1	1	1	2	3	1	1	1	1	173.0	52.0	67.0	17.3745	112	66	178	0.87	1001	\N	0.13	0.1	\N	0	0.87	0.307	1.86	0.13	0	1001	0.334	1.36	0.1	\N	\N	\N	\N	\N	1993-09-01 00:00:00	张志强	510703199309012439
0	1173	1	3	1	106309090013	510623197110061517	1	41	2	2	2	1	1	3	2	3	1	1	167.0	57.0	75.0	20.4382	110	80	26	1.24	147.8	\N	5.19	4.9	\N	0.04	1.24	0.319	0.9	5.19	0	147.8	0.323	0.92	4.9	\N	\N	\N	\N	\N	1971-10-06 00:00:00	刘晓春	510623197110061517
0	1174	1	3	2	106309040002	510702195504213119	1	58	3	3	3	1	1	3	1	3	1	1	168.0	66.5	79.0	23.5615	134	80	7	14.94	\N	1001	9.52	\N	9.1	0	14.94	0.275	0.98	9.52	\N	\N	\N	\N	\N	0	1001	\N	\N	9.1	1955-04-21 00:00:00	池世成	510702195504213119
0	1175	1	3	3	106311070019	510703198412142413	1	28	1	1	1	1	2	3	-1	-1	1	1	160.0	58.0	65.0	22.6562	122	64	30	0	834.85	143.27	0.14	0.11	0.49	0	0	0.303	1.93	0.14	0	834.85	0.332	1.74	0.11	0	143.27	\N	\N	0.49	1984-12-14 00:00:00	马清柏	510703198412142413
0	1177	1	3	3	106309030024	510702195508273119	1	58	3	3	3	1	3	3	1	1	2	2	172.0	69.0	80.0	23.3234	156	96	50	15.99	74.86	9.92	4.1	3.38	2.74	0	15.99	0.288	1.57	4.1	0	74.86	0.358	1.47	3.38	0	9.92	\N	\N	2.74	1955-08-27 00:00:00	王道茂	510702195508273119
0	1178	1	3	3	106309030043	510702195710243116	1	55	3	3	3	1	3	3	2	1	1	1	148.0	49.5	73.0	22.5986	136	70	132	1.66	27.62	19.65	6.369	6.73	4.97	0	1.66	0.301	0.47	6.369	0	27.62	0.329	0.18	6.73	0	19.65	\N	\N	4.97	1957-10-24 00:00:00	王庆华	510702195710243116
0	1180	1	3	3	106308300052	510702197105153111	1	42	2	2	2	1	1	3	2	1	1	1	177.0	67.0	83.0	21.3859	86	76	42	2.46	277.48	703.02	3.59	4.26	3.93	0	2.46	0.315	1.29	3.59	0	277.48	0.296	1.27	4.26	0	703.02	\N	\N	3.93	1971-05-15 00:00:00	葛万富	510702197105153111
0	1181	1	3	1	106310310065	510702197301243122	2	40	2	2	2	1	2	3	1	1	1	1	152.0	61.0	82.0	26.4024	128	80	25	11.83	95.98	\N	7.45	7.25	\N	0	11.83	0.219	0.08	7.45	0	95.98	0.338	0.65	7.25	\N	\N	\N	\N	\N	1973-01-24 00:00:00	谢金花	510702197301243122
0	1183	1	3	1	106310260151	510703198203292423	2	31	2	2	1	1	2	3	1	1	1	1	160.0	54.0	76.0	21.0937	107	68	90	0.05	1001	\N	0.11	0.12	\N	0	0.05	0.319	1.79	0.11	0	1001	0.335	1.57	0.12	\N	\N	\N	\N	\N	1982-03-29 00:00:00	何春霞	510703198203292423
0	1184	1	3	3	106310110022	510721195707060836	1	56	3	3	3	1	1	3	3	1	1	1	170.0	75.0	85.0	25.9516	130	78	21	0.73	161.75	6.11	0.58	0.72	0.47	0	0.73	0.324	1.86	0.58	0	161.75	0.319	1.82	0.72	0	6.11	\N	\N	0.47	1957-07-06 00:00:00	杨纯高	510721195707060836
0	1185	1	3	1	106309090016	510702196407113129	2	49	2	3	2	1	1	3	1	1	2	2	150.0	65.0	91.0	28.8889	160	90	50	0.32	1001	\N	4.15	3.39	\N	0	0.32	0.279	1.31	4.15	0	1001	0.378	1.35	3.39	\N	\N	\N	\N	\N	1964-07-11 00:00:00	雷秀华	510702196407113129
0	1186	1	3	1	106309030020	510703198906162430	1	24	1	1	1	1	3	3	-1	-1	1	1	172.0	52.0	62.0	17.5771	120	64	35	271.77	1001	\N	1.32	1.67	\N	0	271.77	0.282	1.12	1.32	0	1001	0.318	1.21	1.67	\N	\N	\N	\N	\N	1989-06-16 00:00:00	黄强	510703198906162430
0	1187	1	3	3	106309110040	510702196709023129	2	46	2	3	2	1	2	3	1	1	1	1	161.0	52.0	68.0	20.061	120	68	13	0.01	22.15	0.99	0.09	0.08	0.16	0.01	0.01	0.37	1.86	0.09	0	22.15	0.331	1.73	0.08	0	0.99	\N	\N	0.16	1967-09-02 00:00:00	雍达英	510702196709023129
0	1188	1	3	1	106309040032	510702195510253125	2	57	3	3	3	1	3	3	1	1	1	1	154.0	49.0	80.0	20.6612	116	71	34	1.41	6.5	\N	9.91	10.14	\N	0.01	1.41	0.328	0.01	9.91	0	6.5	0.329	0.01	10.14	\N	\N	\N	\N	\N	1955-10-25 00:00:00	王素英	510702195510253125
0	1192	1	3	1	106309060006	51072119720424072X	2	41	2	2	2	1	1	3	1	1	1	1	163.0	80.0	82.0	30.1103	136	84	38	0.96	55.62	\N	0.44	0.43	\N	0.01	0.96	0.356	1.88	0.44	0	55.62	0.32	1.58	0.43	\N	\N	\N	\N	\N	1972-04-24 00:00:00	刘艳琼	51072119720424072X
0	1193	1	3	1	106309030050	510703199201242427	2	21	1	1	1	1	3	3	1	1	1	1	164.0	47.0	63.0	17.4747	104	60	13	6.14	1001	\N	0.13	0.14	\N	0	6.14	0.334	1.83	0.13	0	1001	0.335	1.76	0.14	\N	\N	\N	\N	\N	1992-01-24 00:00:00	唐书容	510703199201242427
0	1195	1	3	1	106311040015	510702197004153112	1	43	2	2	2	1	1	3	-1	-1	1	1	153.0	58.0	75.0	24.7768	126	70	60	7.37	1001	\N	7.03	7.37	\N	0	7.37	0.316	0.62	7.03	0	1001	0.33	0.61	7.37	\N	\N	\N	\N	\N	1970-04-15 00:00:00	肖永忠	510702197004153112
0	1196	1	3	1	106311010010	510721197208230844	2	41	2	2	2	1	3	3	-1	-1	1	1	157.0	50.0	68.0	20.2848	26	72	13	0	674.43	\N	0.11	1.08	\N	0	0	0.326	1.84	0.11	1.22	674.43	0.33	1.78	1.08	\N	\N	\N	\N	\N	1972-08-23 00:00:00	金施凤	510721197208230844
0	1197	1	3	1	106308300034	510702196205203126	2	51	3	3	3	1	1	3	-1	-1	1	1	150.0	44.0	69.0	19.5556	138	80	18	0	1.6	\N	0.1	0.2	\N	0	0	0.285	1.78	0.1	0	1.6	0.34	1.8	0.2	\N	\N	\N	\N	\N	1962-05-20 00:00:00	黄富兰	510702196205203126
0	1200	1	3	1	106309050026	510702196409303110	1	48	2	3	2	1	1	3	1	3	1	1	157.0	51.0	70.0	20.6905	130	74	19	2.11	8.08	\N	9.34	9.15	\N	0	2.11	0.357	0.05	9.34	0	8.08	0.293	0.09	9.15	\N	\N	\N	\N	\N	1964-09-30 00:00:00	王道平	510702196409303110
0	1201	1	3	1	106309050027	510702197103072828	2	42	2	2	2	1	3	3	1	1	1	1	160.0	50.0	60.0	19.5312	136	88	15	0	315.15	\N	0.13	0.08	\N	0	0	0.318	1.87	0.13	0	315.15	0.337	1.84	0.08	\N	\N	\N	\N	\N	1971-03-07 00:00:00	刘仕蓉	510702197103072828
0	1202	1	3	1	106310300206	342626196105074115	1	52	3	3	3	1	3	3	-1	-1	3	3	165.0	60.0	71.0	22.0386	122	80	85	0	435.77	\N	0.1	0.15	\N	0	0	0.331	1.84	0.1	0	435.77	0.324	1.75	0.15	\N	\N	\N	\N	\N	1961-05-07 00:00:00	鲁兆民	342626196105074115
0	1203	1	3	1	106309050048	510703198601032416	1	27	1	1	1	1	3	3	1	2	1	1	172.0	60.0	70.0	20.2812	118	74	42	0.56	205.71	\N	0.17	0.17	\N	0	0.56	0.391	1.78	0.17	0	205.71	0.285	1.75	0.17	\N	\N	\N	\N	\N	1986-01-03 00:00:00	王安虎	510703198601032416
0	1204	1	3	1	106308290026	510702197009283119	1	42	2	2	2	1	3	3	2	3	1	1	170.0	66.0	87.0	22.8374	120	86	16	3.914	778.07	\N	2.85	6.03	\N	0	3.914	0.309	1.48	2.85	0	778.07	0.33	1.36	6.03	\N	\N	\N	\N	\N	1970-09-28 00:00:00	何朝华	510702197009283119
0	1205	1	3	3	106310270152	510702197702052810	1	36	2	2	2	1	3	3	1	1	2	2	168.0	68.0	76.0	24.093	166	92	23	0.29	152.39	33.23	9.2	8.96	4.83	0	0.29	0.363	0.42	9.2	0	152.39	0.36	0.33	8.96	0	33.23	\N	\N	4.83	1977-02-05 00:00:00	谢勇	510702197702052810
0	1206	1	3	3	106309090006	510702195508233125	2	58	3	3	3	1	3	3	1	1	1	1	150.0	55.0	83.0	24.4444	128	86	67	4.28	103.97	3.8	2.08	2.18	2.14	0	4.28	0.285	1.96	2.08	0	103.97	0.304	1.8	2.18	0	3.8	\N	\N	2.14	1955-08-23 00:00:00	羊山英	510702195508233125
0	1207	1	3	1	106309060028	51078119890706046X	2	24	1	1	1	1	2	3	1	1	1	1	157.0	60.0	78.0	24.3418	102	68	20	0	1001	\N	0.39	0.46	\N	0	0	0.318	1.82	0.39	0	1001	0.335	1.74	0.46	\N	\N	\N	\N	\N	1989-07-06 00:00:00	胡静	51078119890706046X
0	1210	1	3	1	106310300069	510702197704047425	2	36	2	2	2	1	3	3	1	1	1	1	155.0	60.0	83.0	24.974	100	70	44	0.28	135.24	\N	0.07	0.1	\N	0	0.28	0.35	1.74	0.07	0	135.24	0.322	1.82	0.1	\N	\N	\N	\N	\N	1977-04-04 00:00:00	阮小清	510702197704047425
0	1212	1	3	2	106310090117	510702197703252814	1	36	2	2	2	1	1	3	1	3	1	1	177.0	73.0	72.0	23.3011	136	72	8	0	\N	4.89	0.13	\N	0.09	0	0	0.299	1.77	0.13	\N	\N	\N	\N	\N	0	4.89	\N	\N	0.09	1977-03-25 00:00:00	李玉诚	510702197703252814
0	1213	1	3	1	106309130011	510703198703222413	1	26	1	1	1	1	1	3	-1	-1	1	1	180.0	88.0	98.0	27.1605	132	94	445	0.11	66.04	\N	0.14	0.11	\N	0	0.11	0.328	1.7	0.14	0	66.04	0.334	1.68	0.11	\N	\N	\N	\N	\N	1987-03-22 00:00:00	李红贤	510703198703222413
0	1217	1	3	1	106308020070	513225198209160329	2	30	2	2	1	1	3	3	-1	-1	1	1	153.0	51.0	84.0	21.7865	100	56	69	0.29	1001	\N	0.09	0.07	\N	0	0.29	0.305	1.78	0.09	0	1001	0.296	1.84	0.07	\N	\N	\N	\N	\N	1982-09-16 00:00:00	赵海燕	513225198209160329
0	1218	1	3	1	106309120028	510702197401143110	1	39	2	2	2	1	1	3	1	1	1	1	167.0	59.0	76.0	21.1553	124	76	16	0	52.21	\N	1.6	0.09	\N	0.02	0	\N	\N	1.6	0.01	52.21	0.355	1.77	0.09	\N	\N	\N	\N	\N	1974-01-14 00:00:00	谢芳宝	510702197401143110
0	1219	1	3	3	106310240056	51072219750203578X	2	38	2	2	2	1	3	3	-1	-1	1	1	157.0	52.0	73.0	21.0962	106	66	11	30.78	1001	1001	0.91	0.71	0.71	0	30.78	0.348	1.35	0.91	0	1001	0.318	1.75	0.71	0	1001	\N	\N	0.71	1975-02-03 00:00:00	吴金华	51072219750203578X
0	1221	1	3	1	106311070052	51078119831106083X	1	30	2	2	1	1	3	3	-1	-1	1	1	163.0	67.0	73.0	25.2174	126	60	33	1.6	1001	\N	0.08	0.06	\N	0	1.6	0.299	1.57	0.08	0	1001	0.306	1.84	0.06	\N	\N	\N	\N	\N	1983-11-06 00:00:00	唐斌	51078119831106083X
0	1223	1	3	1	106309050030	519002197406300867	2	39	2	2	2	1	1	3	1	1	1	1	164.0	61.0	68.0	22.68	122	78	18	2.87	52.66	\N	0.09	0.06	\N	0	2.87	0.53	1.38	0.09	0	52.66	0.338	1.691	0.06	\N	\N	\N	\N	\N	1974-06-30 00:00:00	李琼	519002197406300867
0	1225	1	3	2	106309110011	510702196810163118	1	44	2	2	2	1	1	3	1	1	1	1	175.0	60.0	68.0	19.5918	118	74	28	5.7	\N	43.74	9.2	\N	8.37	0	5.7	0.332	0.85	9.2	\N	\N	\N	\N	\N	0.01	43.74	\N	\N	8.37	1968-10-16 00:00:00	王辉	510702196810163118
0	1226	1	3	1	106310310002	510702197611182847	2	36	2	2	2	1	2	3	1	1	1	1	165.0	50.0	80.0	18.3655	116	72	17	0	365.29	\N	0.1	0.09	\N	0	0	0.354	1.93	0.1	0	365.29	0.393	1.55	0.09	\N	\N	\N	\N	\N	1976-11-18 00:00:00	刘文清	510702197611182847
0	1227	1	3	3	106310280259	510703197507181728	2	38	2	2	2	1	2	3	-1	-1	1	1	158.0	55.0	73.0	22.0317	100	60	19	0	29.63	1001	0.13	0.12	1.27	0	0	0.312	1.85	0.13	0	29.63	0.327	1.81	0.12	0	1001	\N	\N	1.27	1975-07-18 00:00:00	陈学燕	510703197507181728
0	1228	1	3	3	106310270105	510703198408092441	2	29	1	1	1	1	3	3	-1	-1	1	1	150.0	49.0	67.0	21.7778	106	60	21	0	1001	941.46	1.68	0.09	0.08	0.02	0	\N	\N	1.68	0	1001	0.327	1.89	0.09	0	941.46	\N	\N	0.08	1984-08-09 00:00:00	龙晓兰	510703198408092441
0	1229	1	3	1	106311050075	510822198612034761	2	26	1	1	1	1	2	3	-1	-1	1	1	158.0	67.0	87.0	26.8386	118	70	11	0.56	1001	\N	0.12	0.09	\N	0	0.56	0.306	2.06	0.12	0	1001	0.302	1.82	0.09	\N	\N	\N	\N	\N	1986-12-03 00:00:00	苟文霞	510822198612034761
0	1230	1	3	1	106310250118	520202198611227426	2	26	1	1	1	1	2	3	-1	-1	1	1	150.0	46.0	70.0	20.4444	12	66	13	0	799.37	\N	0.364	1.08	\N	0.04	0	\N	\N	0.364	0	799.37	0.369	1.71	1.08	\N	\N	\N	\N	\N	1986-11-22 00:00:00	何春花	520202198611227426
0	1231	1	3	1	106310200143	510703199507222445	2	18	1	1	1	1	3	3	-1	-1	1	1	160.0	50.0	63.0	19.5312	104	64	9	0.54	761.08	\N	0.1	0.1	\N	0	0.54	0.377	1.81	0.1	0	761.08	0.324	1.82	0.1	\N	\N	\N	\N	\N	1995-07-22 00:00:00	雷雨	510703199507222445
0	1233	1	3	1	106307290066	510703199103162423	2	22	1	1	1	1	2	3	1	1	1	1	163.0	63.0	82.0	23.7118	118	56	17	0	1001	\N	1.67	0.06	\N	0.02	0	\N	\N	1.67	0	1001	0.318	2.04	0.06	\N	\N	\N	\N	\N	1991-03-16 00:00:00	魏晓雪	510703199103162423
0	1235	1	3	1	106310290026	51070319860926246X	2	27	1	1	1	1	3	3	-1	-1	1	1	152.0	47.0	70.0	20.3428	120	74	23	0	44.04	\N	0.18	0.12	\N	0	0	0.327	1.74	0.18	0	44.04	0.292	1.82	0.12	\N	\N	\N	\N	\N	1986-09-26 00:00:00	杨华	51070319860926246X
0	1236	1	3	1	106310210007	510781197603120836	1	37	2	2	2	1	1	3	-1	-1	1	1	169.0	74.0	88.0	25.9095	134	72	66	0	1001	\N	1.75	0.07	\N	0.03	0	\N	\N	1.75	0	1001	0.373	1.85	0.07	\N	\N	\N	\N	\N	1976-03-12 00:00:00	李勇	510781197603120836
0	1239	1	3	1	106310190148	510227198208123382	2	31	2	2	1	1	1	3	-1	-1	1	1	148.0	46.0	65.0	21.0007	96	60	13	2.27	104.41	\N	7.43	8.16	\N	0.01	2.27	0.347	0.98	7.43	0	104.41	0.331	1.15	8.16	\N	\N	\N	\N	\N	1982-08-12 00:00:00	刘小梅	510227198208123382
0	1240	1	3	1	106310280121	51078119860816084X	2	27	1	1	1	1	3	3	1	1	1	1	150.0	41.0	70.0	18.2222	104	60	14	0	4.76	\N	0.05	0.08	\N	0	0	0.377	1.69	0.05	0	4.76	0.288	1.75	0.08	\N	\N	\N	\N	\N	1986-08-16 00:00:00	刘蓉	51078119860816084X
0	1242	1	3	3	106310170055	510702197604072826	2	37	2	2	2	1	1	3	1	1	1	1	150.0	50.0	64.0	22.2222	108	58	13	1.1	123.96	15.43	8.89	8.87	8.78	0	1.1	0.277	1.32	8.89	0	123.96	0.304	1.4	8.87	0	15.43	\N	\N	8.78	1976-04-07 00:00:00	李克蓉	510702197604072826
0	1243	1	3	1	106311030051	510702197509282825	2	38	2	2	2	1	3	1	-1	-1	1	1	162.0	71.0	73.0	27.0538	98	72	13	0.03	86.35	\N	0.06	5.84	\N	0	0.03	0.38	1.63	0.06	0	86.35	0.335	1.6	5.84	\N	\N	\N	\N	\N	1975-09-28 00:00:00	武杨	510702197509282825
0	1248	1	3	1	106310250027	510703199607162435	1	17	1	1	1	1	2	3	-1	-1	1	1	178.0	54.0	64.0	17.0433	102	60	14	8.8	1001	\N	1.87	0.01	\N	0.03	8.8	\N	\N	1.87	0	1001	0.302	1.87	0.01	\N	\N	\N	\N	\N	1996-07-16 00:00:00	魏文强	510703199607162435
0	1249	1	3	3	106310280103	51072219861105874X	2	26	1	1	1	1	1	3	1	2	1	1	160.0	57.0	74.0	22.2656	114	70	34	0.31	620.51	150.51	0.1	0.09	0.15	0	0.31	0.33	1.74	0.1	0	620.51	0.287	1.59	0.09	0	150.51	\N	\N	0.15	1986-11-05 00:00:00	杨海清	51072219861105874X
0	1251	1	3	1	106310170114	510703198408062429	2	29	1	1	1	1	1	3	1	1	1	1	165.0	63.0	78.0	23.1405	120	72	23	0.13	1001	\N	0.15	0.13	\N	0	0.13	0.31	1.8	0.15	0	1001	0.309	1.64	0.13	\N	\N	\N	\N	\N	1984-08-06 00:00:00	蒋晓娟	510703198408062429
0	1255	1	3	3	106310280237	510703198305012453	1	30	2	2	1	1	2	3	-1	-1	1	1	170.0	55.0	67.0	19.0311	128	80	24	10.58	1001	876.76	7.38	7.49	6.16	0	10.58	0.343	1.37	7.38	0	1001	0.351	1.48	7.49	0	876.76	\N	\N	6.16	1983-05-01 00:00:00	尹勇	510703198305012453
0	1257	1	3	1	106311140005	510703198504212415	1	28	1	1	1	1	3	1	2	2	1	1	176.0	82.0	90.0	26.4721	147	88	186	0.06	77.61	\N	0.13	0.21	\N	0	0.06	0.301	1.73	0.13	0	77.61	0.334	1.86	0.21	\N	\N	\N	\N	\N	1985-04-21 00:00:00	曾睿	510703198504212415
0	1259	1	3	1	106310170028	510823198908031195	1	24	1	1	1	1	1	3	-1	-1	1	1	175.0	53.0	60.0	17.3061	117	73	24	66.25	280.92	\N	7.63	7.79	\N	0	66.25	0.314	1.58	7.63	0	280.92	0.316	1.52	7.79	\N	\N	\N	\N	\N	1989-08-03 00:00:00	侯建平	510823198908031195
0	1260	1	3	3	106310170033	510702197709262829	2	36	2	2	2	1	3	3	1	1	1	1	15.0	53.0	73.0	2355.56	114	72	40	10.98	51.84	15.12	3.93	3.76	2.61	0	10.98	0.336	1.49	3.93	0	51.84	0.331	1.53	3.76	0	15.12	\N	\N	2.61	1977-09-26 00:00:00	李俊	510702197709262829
0	1261	1	3	3	106310170029	511026197806192010	1	35	2	2	2	1	1	3	2	2	1	1	177.0	95.0	101.0	30.3233	124	86	68	99.04	840.22	100.28	6.32	6.33	3.45	0	99.04	0.337	0.4	6.32	0	840.22	0.317	0.45	6.33	0	100.28	\N	\N	3.45	1978-06-19 00:00:00	周茂彬	511026197806192010
0	1264	1	3	1	106311030050	51070319880726241X	1	25	1	1	1	1	1	3	-1	-1	1	1	173.0	75.0	88.0	25.0593	138	82	81	1.38	239.25	\N	0.08	0.06	\N	0	1.38	0.328	1.9	0.08	0	239.25	0.326	1.84	0.06	\N	\N	\N	\N	\N	1988-07-26 00:00:00	曾晓龙	51070319880726241X
0	1266	1	3	1	106310300192	51070219750904312X	2	38	2	2	2	1	2	3	-1	-1	1	1	155.0	65.0	80.0	27.0552	124	88	23	10.22	81.52	\N	8.03	8.55	\N	0	10.22	0.393	0.89	8.03	0	81.52	0.323	0.89	8.55	\N	\N	\N	\N	\N	1975-09-04 00:00:00	魏玉	51070219750904312X
0	1268	1	3	1	106310140064	510722198310277308	2	29	1	1	1	1	3	3	1	1	1	1	163.0	46.0	63.0	17.3134	128	80	83	0.25	120.99	\N	8.1	7.66	\N	0	0.25	0.346	1.39	8.1	0	120.99	0.33	1.39	7.66	\N	\N	\N	\N	\N	1983-10-27 00:00:00	肖雪	510722198310277308
0	1269	1	3	1	106310220029	210522197805275324	2	35	2	2	2	1	3	3	1	1	1	1	167.0	74.0	84.0	26.5338	118	76	20	0.11	1001	\N	0.012	0.48	\N	0	0.11	0.319	1.82	0.012	0	1001	0.311	1.77	0.48	\N	\N	\N	\N	\N	1978-05-27 00:00:00	丛晓娟	210522197805275324
0	1273	1	3	1	106310300096	510704197805085124	2	35	2	2	2	1	1	3	-1	-1	1	1	165.0	70.0	83.0	25.7117	126	80	39	3.15	3.14	\N	8.88	9.04	\N	0	3.15	0.29	1.31	8.88	0	3.14	0.358	1.33	9.04	\N	\N	\N	\N	\N	1978-05-08 00:00:00	乔丽	510704197805085124
0	1274	1	3	1	106310290158	510703199406082412	1	19	1	1	1	1	2	3	-1	-1	1	1	173.0	52.0	85.0	17.3745	118	62	17	0.99	1001	\N	0.15	0.18	\N	0	0.99	0.345	1.78	0.15	0	1001	0.365	1.71	0.18	\N	\N	\N	\N	\N	1994-06-08 00:00:00	杨兵	510703199406082412
0	1278	1	3	1	106310310070	510726197609175825	2	37	2	2	2	2	2	3	-1	-1	1	1	152.0	48.0	68.0	20.7756	6	64	18	0	551.63	\N	0.16	0.07	\N	0	0	0.334	1.97	0.16	0	551.63	0.346	1.85	0.07	\N	\N	\N	\N	\N	1976-09-17 00:00:00	李蓉华	510726197609175825
0	1280	1	3	1	106311040036	510703198009182415	1	33	2	2	1	1	1	3	-1	-1	1	1	175.0	77.0	80.0	25.1429	126	60	27	5.18	93.85	\N	9.06	9.23	\N	0	5.18	0.298	1.1	9.06	0	93.85	0.342	1.22	9.23	\N	\N	\N	\N	\N	1980-09-18 00:00:00	刘剑	510703198009182415
0	1281	1	3	1	106310280002	510703199310152420	2	20	1	1	1	1	1	3	-1	-1	1	1	168.0	62.0	78.0	21.9671	108	75	31	12.5	59.32	\N	1.85	0.2	\N	0.03	12.5	\N	\N	1.85	0	59.32	0.325	1.86	0.2	\N	\N	\N	\N	\N	1993-10-15 00:00:00	曾春贺	510703199310152420
0	1282	1	3	1	106310290156	51070219750403622X	2	38	2	2	2	1	3	3	-1	-1	1	1	154.0	54.0	64.0	22.7694	108	69	23	0.09	13.71	\N	3.76	4.25	\N	0	0.09	0.333	1.33	3.76	0	13.71	0.325	1.37	4.25	\N	\N	\N	\N	\N	1975-04-03 00:00:00	王晓英	51070219750403622X
0	1283	1	3	1	106310200178	510702197409062841	2	39	2	2	2	1	2	3	1	1	1	1	147.0	39.0	57.0	18.048	102	74	14	2.73	17.33	\N	8.81	9.27	\N	0	2.73	0.304	1.41	8.81	0	17.33	0.309	1.54	9.27	\N	\N	\N	\N	\N	1974-09-06 00:00:00	王勤	510702197409062841
0	1284	1	3	1	106311040002	510703198301182412	1	30	2	2	1	1	3	3	-1	-1	1	1	173.0	57.0	70.0	19.0451	92	62	24	0	44.06	\N	0.21	0.1	\N	0	0	0.294	1.71	0.21	0	44.06	0.479	1.83	0.1	\N	\N	\N	\N	\N	1983-01-18 00:00:00	刘波	510703198301182412
0	1285	1	3	1	106310210046	510227197405122245	2	39	2	2	2	1	3	3	1	1	1	1	158.0	50.0	66.0	20.0288	100	64	38	0.19	799.86	\N	0.13	0.08	\N	0	0.19	0.343	1.85	0.13	0	799.86	0.415	1.87	0.08	\N	\N	\N	\N	\N	1974-05-12 00:00:00	曾秀娟	510227197405122245
0	1286	1	3	2	106310300154	510726197508084617	1	38	2	2	2	1	1	3	-1	-1	1	1	163.0	65.0	77.0	24.4646	122	80	38	0	\N	21.68	0.2	\N	0.15	0	0	0.311	1.69	0.2	\N	\N	\N	\N	\N	0	21.68	\N	\N	0.15	1975-08-08 00:00:00	王刚军	510726197508084617
0	1288	1	3	1	106310250132	510703198706022417	1	26	1	1	1	1	1	3	-1	-1	1	1	154.0	45.0	62.0	18.9745	124	70	15	0.1	1001	\N	0.13	0.07	\N	0	0.1	0.302	1.91	0.13	0	1001	0.3	1.95	0.07	\N	\N	\N	\N	\N	1987-06-02 00:00:00	李涛	510703198706022417
0	1289	1	3	1	106310220043	510702197412273113	1	38	2	2	2	1	2	3	3	3	1	1	166.0	75.0	82.0	27.2173	138	80	27	14.01	706.82	\N	6.44	6.71	\N	0	14.01	0.302	0.01	6.44	0	706.82	0.355	0.02	6.71	\N	\N	\N	\N	\N	1974-12-27 00:00:00	罗兴全	510702197412273113
0	1290	1	3	1	106310210048	510724197402202846	2	39	2	2	2	1	1	3	1	1	1	1	153.0	55.0	72.0	23.4952	108	72	13	0	819.79	\N	0.21	0.17	\N	0	0	0.343	1.77	0.21	0	819.79	0.308	1.67	0.17	\N	\N	\N	\N	\N	1974-02-20 00:00:00	肖菊华	510724197402202846
0	1291	1	3	1	106310190064	510823197310200068	2	39	2	2	2	1	1	3	1	1	1	1	160.0	62.0	73.0	24.2187	132	76	11	0	718.67	\N	0.72	0.11	\N	0	0	0.304	1.81	0.72	0	718.67	0.282	1.81	0.11	\N	\N	\N	\N	\N	1973-10-20 00:00:00	梁青英	510823197310200068
0	1292	1	3	1	106310220097	510223198203246126	2	31	2	2	1	1	3	3	-1	-1	1	1	162.0	43.0	58.0	16.3847	110	78	64	0	1001	\N	1.59	0.07	\N	0.03	0	\N	\N	1.59	0	1001	0.336	1.89	0.07	\N	\N	\N	\N	\N	1982-03-24 00:00:00	田茂之	510223198203246126
0	1294	1	3	1	106310200016	510781198002242680	2	33	2	2	1	1	2	3	1	1	1	1	167.0	55.0	72.0	19.721	94	66	29	1.45	751.49	\N	0.17	0.07	\N	0	1.45	0.308	1.79	0.17	0	751.49	0.335	1.83	0.07	\N	\N	\N	\N	\N	1980-02-24 00:00:00	刘秀元	510781198002242680
0	1295	1	3	3	106310260084	51072219760820158X	2	37	2	2	2	1	1	1	1	1	1	1	152.0	51.0	67.0	22.0741	98	70	22	8.44	1001	38.83	7.73	0.17	8.36	0	8.44	0.326	1.72	7.73	0	1001	0.323	1.87	0.17	0	38.83	\N	\N	8.36	1976-08-20 00:00:00	彭伟琼	51072219760820158X
0	1296	1	3	2	106310310032	510702197808262824	2	35	2	2	2	1	3	3	-1	-1	1	1	163.0	52.0	70.0	19.5717	104	60	34	0.12	\N	25.82	0.03	\N	0.41	0	0.12	0.327	1.71	0.03	\N	\N	\N	\N	\N	0	25.82	\N	\N	0.41	1978-08-26 00:00:00	魏洪萍	510702197808262824
0	1297	1	3	1	106310210139	510703198906282424	2	24	1	1	1	1	3	3	-1	-1	1	1	153.0	51.0	72.0	21.7865	112	68	21	0	443.22	\N	0.1	0.08	\N	0	0	0.309	2.01	0.1	0	443.22	0.335	1.83	0.08	\N	\N	\N	\N	\N	1989-06-28 00:00:00	张方敏	510703198906282424
0	1298	1	3	1	106310150064	510702197505063115	1	38	2	2	2	1	3	3	2	2	1	1	151.0	46.0	63.0	20.1746	122	72	29	0.47	136.42	\N	7.89	8.07	\N	0	0.47	0.318	1.02	7.89	0.02	136.42	0.351	0.83	8.07	\N	\N	\N	\N	\N	1975-05-06 00:00:00	王林业	510702197505063115
0	1302	1	3	1	106310220123	510703198604092422	2	27	1	1	1	1	3	3	1	1	1	1	15745.0	60.0	未查	0.00242028	92	60	38	0	1001	\N	0.16	0.26	\N	0	0	0.326	1.94	0.16	0	1001	0.334	1.77	0.26	\N	\N	\N	\N	\N	1986-04-09 00:00:00	未晓凤	510703198604092422
0	1303	1	3	1	106310230075	51070319870804242X	2	26	1	1	1	1	1	3	-1	-1	1	1	162.0	55.0	75.0	20.9572	110	73	15	82.93	163.44	\N	0.22	0.39	\N	0	82.93	0.353	1.84	0.22	0.7	163.44	2.228	0.17	0.39	\N	\N	\N	\N	\N	1987-08-04 00:00:00	张芳	51070319870804242X
0	1304	1	3	1	106308290007	510726198908225225	2	24	1	1	1	2	3	3	1	1	1	1	163.0	48.0	67.0	18.0662	114	66	50	0	118.341	\N	0.26	0.14	\N	0	0	0.328	1.42	0.26	0	118.341	0.322	1.7	0.14	\N	\N	\N	\N	\N	1989-08-22 00:00:00	韩德美	510726198908225225
0	1307	1	3	1	106311140006	511023198311118121	2	30	2	2	1	1	3	3	-1	-1	1	1	159.0	50.0	70.0	19.7777	118	78	22	1.91	1001	\N	0.16	0.14	\N	0.01	1.91	0.341	1.87	0.16	0	1001	0.336	1.93	0.14	\N	\N	\N	\N	\N	1983-11-11 00:00:00	邓燕玲	511023198311118121
0	1308	1	3	1	106310270218	510727198608104348	2	27	1	1	1	2	2	3	1	1	1	1	155.0	41.0	51.0	17.0656	96	60	19	0	1001	\N	0.16	0.11	\N	0.03	0	0.341	1.9	0.16	0	1001	0.314	1.84	0.11	\N	\N	\N	\N	\N	1986-08-10 00:00:00	俞静	510727198608104348
0	1311	1	3	1	106310240107	510703198907042414	1	24	1	1	1	1	2	1	-1	-1	1	1	175.0	60.0	74.0	19.5918	126	64	24	3.1	1001	\N	0.17	0.12	\N	0	3.1	0.334	1.61	0.17	0	1001	0.292	1.7	0.12	\N	\N	\N	\N	\N	1989-07-04 00:00:00	罗军	510703198907042414
0	1313	1	3	1	106310270108	51070319980110241X	1	15	1	1	1	1	2	3	-1	-1	1	1	170.0	50.0	55.0	17.301	102	70	17	0	157.03	\N	1.78	0.06	\N	0.03	0	\N	\N	1.78	0	157.03	0.438	1.95	0.06	\N	\N	\N	\N	\N	1998-01-10 00:00:00	陈宏	51070319980110241X
0	1314	1	3	1	106310200046	510703199605212419	1	17	1	1	1	1	2	3	1	2	1	1	185.0	59.0	64.0	17.2389	108	60	16	0	349.74	\N	1.71	0.11	\N	0.02	0	\N	\N	1.71	0.03	349.74	0.487	1.45	0.11	\N	\N	\N	\N	\N	1996-05-21 00:00:00	魏林康	510703199605212419
0	1319	1	3	1	106311140010	510703198310012431	1	30	2	2	1	1	3	1	-1	-1	1	1	170.0	69.0	77.0	23.8754	119	72	16	0	801.87	\N	0.14	0.15	\N	0	0	0.319	1.79	0.14	0	801.87	0.38	1.88	0.15	\N	\N	\N	\N	\N	1983-10-01 00:00:00	李万能	510703198310012431
0	1321	1	3	1	106307180023	510727199305262124	2	20	1	1	1	1	2	1	-1	-1	1	1	167.0	52.0	65.0	18.6453	115	60	7	3.76	1001	\N	0.12	0.08	\N	0	3.76	0.343	1.83	0.12	0	1001	0.325	1.68	0.08	\N	\N	\N	\N	\N	1993-05-26 00:00:00	何晓熙	510727199305262124
0	1324	1	3	3	106310290184	510703199109072437	1	22	1	1	1	1	3	1	2	1	1	1	177.0	78.0	83.0	24.8971	122	74	28	0.12	1001	163.72	0.11	0.8	0.11	0	0.12	0.369	1.96	0.11	0	1001	0.347	1.98	0.8	0	163.72	\N	\N	0.11	1991-09-07 00:00:00	张旭龙	510703199109072437
0	1330	1	3	1	106311040050	51070319950812242X	2	18	1	1	1	1	2	1	-1	-1	1	1	158.0	50.0	58.0	20.0288	112	68	23	0	151.87	\N	0.16	0.12	\N	0	0	0.326	1.66	0.16	0	151.87	0.365	1.77	0.12	\N	\N	\N	\N	\N	1995-08-12 00:00:00	李玲玲	51070319950812242X
0	1331	1	3	1	106308070106	510703198607252428	2	27	1	1	1	1	3	1	-1	-1	1	1	153.0	50.0	70.0	21.3593	102	64	9	0	80.43	\N	0.29	0.13	\N	0	0	0.33	1.87	0.29	0	80.43	0.334	1.8	0.13	\N	\N	\N	\N	\N	1986-07-25 00:00:00	谢术容	510703198607252428
0	1333	1	3	1	106309050035	510704198809072624	2	24	1	1	1	1	3	1	1	1	1	1	167.0	58.0	72.0	20.7967	120	68	17	0	174.58	\N	0.48	0.38	\N	0	0	0.315	1.82	0.48	0	174.58	0.314	1.86	0.38	\N	\N	\N	\N	\N	1988-09-07 00:00:00	陈香	510704198809072624
0	1341	1	3	3	106311120016	510703198212292417	1	30	2	2	1	1	3	1	-1	-1	1	1	168.0	70.0	85.0	24.8016	133	72	45	0	625	112.47	0.09	0.1	0.07	0	0	0.283	1.95	0.09	0	625	0.337	2.05	0.1	0	112.47	\N	\N	0.07	1982-12-29 00:00:00	徐波	510703198212292417
0	1342	1	3	1	106310310053	340824198002101462	2	33	2	2	1	1	3	1	-1	-1	1	1	165.0	55.0	71.0	20.202	100	60	18	0.1	714.83	\N	0.2	0.19	\N	0	0.1	0.327	1.76	0.2	0	714.83	0.287	1.69	0.19	\N	\N	\N	\N	\N	1980-02-10 00:00:00	陈细华	340824198002101462
0	1343	1	3	3	106310250092	510703199612212425	2	16	1	1	1	1	2	3	-1	-1	1	1	155.0	35.0	55.0	14.5682	120	98	41	0.57	1001	18.19	0.12	0.06	0.13	0	0.57	0.326	1.73	0.12	0	1001	0.331	1.84	0.06	0	18.19	\N	\N	0.13	1996-12-21 00:00:00	毛长华	510703199612212425
0	1345	1	3	3	106307210020	510703199711012429	2	15	1	1	1	1	2	3	1	1	1	1	159.0	42.0	62.0	16.6133	98	60	12	14.43	820.87	173.68	0.22	0.13	0.25	0	14.43	0.364	1.91	0.22	0	820.87	0.301	1.79	0.13	0	173.68	\N	\N	0.25	1997-11-01 00:00:00	何婷婷	510703199711012429
0	1346	1	3	2	106308210007	510703199806292419	1	15	1	1	1	1	2	3	1	1	1	1	160.0	41.0	62.5	16.0156	98	60	13	60.95	\N	1001	0.13	\N	0.3	0	60.95	0.333	1.97	0.13	\N	\N	\N	\N	\N	0.01	1001	\N	\N	0.3	1998-06-29 00:00:00	张刘洋	510703199806292419
0	1347	1	3	1	106310170067	510703199107242420	2	22	1	1	1	1	2	1	1	1	1	1	160.0	60.0	75.0	23.4375	120	62	33	0	6.3	\N	0.76	0.1	\N	0	0	0.331	1.71	0.76	0	6.3	0.339	1.73	0.1	\N	\N	\N	\N	\N	1991-07-24 00:00:00	夏青青	510703199107242420
0	1349	1	3	1	106310140084	51070319910219241X	1	22	1	1	1	1	2	3	-1	-1	1	1	175.0	60.0	60.0	19.5918	114	64	16	0.14	951.41	\N	0.15	0.13	\N	0	0.14	0.313	1.9	0.15	0	951.41	0.336	1.9	0.13	\N	\N	\N	\N	\N	1991-02-19 00:00:00	苏东波	51070319910219241X
0	1350	1	3	1	106311100002	51070319950608241X	1	18	1	1	1	1	2	3	-1	-1	1	1	174.0	50.0	66.0	16.5147	96	60	16	0.4	1001	\N	0.09	0.1	\N	0	0.4	0.332	1.73	0.09	0	1001	0.332	1.69	0.1	\N	\N	\N	\N	\N	1995-06-08 00:00:00	魏全波	51070319950608241X
0	1351	1	3	1	106307290010	510703199705282414	1	16	1	1	1	1	2	3	1	1	1	1	170.0	48.0	67.0	16.609	121	71	11	4.96	1001	\N	0.2	0.08	\N	0	4.96	0.324	1.88	0.2	0	1001	0.326	1.92	0.08	\N	\N	\N	\N	\N	1997-05-28 00:00:00	魏巍	510703199705282414
2	1353	1	3	2	106309120180	510703199904073914	1	14	0	0	0	1	2	3	1	1	1	1	175.0	49.0	58.0	16	114	76	8	0.37	\N	183.69	0.09	\N	0.1	0	0.37	0.32	1.73	0.09	\N	\N	\N	\N	\N	0	183.69	\N	\N	0.1	1999-04-07 00:00:00	毛军	510703199904073914
0	1354	1	3	2	106310300193	510703199311022425	2	19	1	1	1	1	2	3	-1	-1	1	1	160.0	42.0	66.0	16.4062	110	74	15	24.01	\N	124.99	0.26	\N	0.13	0	24.01	0.293	1.96	0.26	\N	\N	\N	\N	\N	0	124.99	\N	\N	0.13	1993-11-02 00:00:00	魏冬梅	510703199311022425
4	7	2	2	0	103309130003	51070219570804541X	1	56	3	3	3	1	1	3	3	2	1	1	165	61	83	22.4059	95	123	56	2.42	\N	\N	0.5	\N	\N	0	2.42	0.305	1.18	0.5	\N	\N	\N	\N	\N	\N	\N	\N	\N	\N	1957-08-04 00:00:00	赖复勇	51070219570804541X
4	12	2	2	0	103311040068	510602197510255140	2	38	2	2	2	1	1	3	1	\N	1	1	152	57.1	90	24.7143	74	129	44	27.05	\N	\N	1.49	\N	\N	0	27.05	0.304	1.63	1.49	\N	\N	\N	\N	\N	\N	\N	\N	\N	\N	1975-10-25 00:00:00	刘俠	510602197510255140
4	33	2	2	0	103308080013	513437196103056424	2	52	3	3	3	1	1	3	1	\N	1	1	145	43.3	63	20.5945	71	104	25	0	\N	\N	\N	\N	\N	>250	0	\N	\N	\N	\N	\N	\N	\N	\N	\N	\N	\N	\N	\N	1961-03-05 00:00:00	薛文分	513437196103056424
4	62	2	1	0	103311040034	510702196312105521	2	49	2	3	2	1	1	3	1	\N	1	1	155	65.1	86	27.0968	84	136	41	561.1	\N	\N	0.005	\N	\N	0.02	561.1	\N	\N	0.005	\N	\N	\N	\N	\N	\N	\N	\N	\N	\N	1963-12-10 00:00:00	谢秀芳	510702196312105521
4	69	2	2	0	103310280020	510702196503115423	2	48	2	3	2	1	1	3	1	2	1	1	148	55.5	78	25.3378	66	137	17	29.3	\N	\N	1.89	\N	\N	0.03	29.3	\N	\N	1.89	\N	\N	\N	\N	\N	\N	\N	\N	\N	\N	1965-03-11 00:00:00	周志惠	510702196503115423
4	76	2	2	0	103308290079	510703199311213117	1	19	1	1	1	1	1	3	1	2	1	1	180	69.6	76	21.4815	79	135	16	51.5	\N	\N	0.004	\N	\N	-2	51.5	\N	\N	0.004	\N	\N	\N	\N	\N	\N	\N	\N	\N	\N	1993-11-21 00:00:00	杨林	510703199311213117
4	117	2	2	0	103312240012	510703197904093115	1	34	2	2	2	1	1	3	1	2	1	1	165	71.9	83	26.4096	96	143	27	24	\N	\N	1.93	\N	\N	-2	24	\N	\N	1.93	\N	\N	\N	\N	\N	\N	\N	\N	\N	\N	1979-04-09 00:00:00	刘昌荣	510703197904093115
4	143	2	2	0	103311100029	510722198801182063	2	25	1	1	1	1	1	3	1	\N	1	1	146.8	37.6	67	17.4476	76	113	9	3.72	\N	\N	7.96	\N	\N	0.02	3.72	0.452	0.81	7.96	\N	\N	\N	\N	\N	\N	\N	\N	\N	\N	1988-01-18 00:00:00	李才琼	510722198801182063
4	176	2	2	0	103312250007	51070219650514544X	2	48	2	3	2	1	1	3	1	2	1	1	152	53	76	22.9398	86	140	19	4.66	\N	\N	0.16	\N	\N	0.02	4.66	0.494	1.49	0.16	\N	\N	\N	\N	\N	\N	\N	\N	\N	\N	1965-05-14 00:00:00	林玉珍	51070219650514544X
4	180	2	2	0	103312210017	510726197302174625	2	40	2	2	2	1	1	3	1	\N	1	1	150	48.5	72	21.5556	72	149	22	0.53	\N	\N	0.23	\N	\N	0	0.53	0.319	1.35	0.23	\N	\N	\N	\N	\N	\N	\N	\N	\N	\N	1973-02-17 00:00:00	杨正艳	510726197302174625
4	186	2	2	0	103310260017	510702197302265454	1	40	2	2	2	1	1	3	3	\N	1	1	160	75.9	82	29.6484	78	131	44	23.48	\N	\N	4.67	\N	\N	0	23.48	0.296	1.31	4.67	\N	\N	\N	\N	\N	\N	\N	\N	\N	\N	1973-02-26 00:00:00	郭斯清	510702197302265454
4	189	2	2	0	103310070037	510626198606195272	1	27	1	1	1	1	1	3	1	2	1	1	160	60	80	23.4375	83	122	44	3.59	\N	\N	0.15	\N	\N	0	3.59	0.313	1.84	0.15	\N	\N	\N	\N	\N	\N	\N	\N	\N	\N	1986-06-19 00:00:00	肖亮	510626198606195272
4	192	2	2	0	103309180104	510703198504123121	2	28	1	1	1	1	1	3	1	\N	1	1	156	52	70	21.3675	78	121	17	0.94	\N	\N	8.13	\N	\N	0	0.94	0.3	1.54	8.13	\N	\N	\N	\N	\N	\N	\N	\N	\N	\N	1985-04-12 00:00:00	李娟	510703198504123121
4	199	2	2	0	103309250006	510702196502165429	2	48	2	3	2	1	1	3	1	\N	1	1	155	49.7	76	20.6868	78	128	12	0.24	\N	\N	0.13	\N	\N	0.01	0.24	0.326	1.68	0.13	\N	\N	\N	\N	\N	\N	\N	\N	\N	\N	1965-02-16 00:00:00	任家琼	510702196502165429
4	206	2	2	0	103309110067	510702196410025410	1	48	2	3	2	1	1	3	1	\N	1	2	150	51.8	78	23.0222	66	109	36	1.02	\N	\N	9.56	\N	\N	0.01	1.02	0.369	0.63	9.56	\N	\N	\N	\N	\N	\N	\N	\N	\N	\N	1964-10-02 00:00:00	李金木	510702196410025410
4	214	2	1	0	103312200020	510702195610245448	2	57	3	3	3	1	1	3	1	\N	1	1	154	54.3	80	22.8959	76	137	22	13.93	\N	\N	3.69	\N	\N	0	13.93	0.421	1.3	3.69	\N	\N	\N	\N	\N	\N	\N	\N	\N	\N	1956-10-24 00:00:00	谢代英	510702195610245448
4	216	2	2	0	103309270125	510703199202143113	1	21	1	1	1	1	2	3	1	\N	1	1	170	55.5	72	19.2042	71	113	17	2.32	\N	\N	0.17	\N	\N	0	2.32	0.313	1.76	0.17	\N	\N	\N	\N	\N	\N	\N	\N	\N	\N	1992-02-14 00:00:00	陈园园	510703199202143113
4	226	2	2	0	103312230003	510703198110013130	1	32	2	2	2	1	1	3	2	2	1	1	168	63.5	70	22.4986	69	114	31	55.54	\N	\N	4.92	\N	\N	0	55.54	0.262	1.58	4.92	\N	\N	\N	\N	\N	\N	\N	\N	\N	\N	1981-10-01 00:00:00	邓兴明	510703198110013130
4	232	2	2	0	103312270009	51060219750214511X	1	38	2	2	2	1	1	3	1	2	1	1	170	73.6	90	25.4671	96	144	24	196.28	\N	\N	4.77	\N	\N	0	196.28	0.336	1.04	4.77	\N	\N	\N	\N	\N	\N	\N	\N	\N	\N	1975-02-14 00:00:00	谢家兴	51060219750214511X
4	241	2	2	0	103310240042	510702196701285415	1	46	2	3	2	1	1	3	3	4	1	1	153	43.6	66	18.6253	57	103	25	>1000	\N	\N	\N	\N	\N	0.01	>1000	0.283	1.58	\N	\N	\N	\N	\N	\N	\N	\N	\N	\N	\N	1967-01-28 00:00:00	李明	510702196701285415
4	277	2	2	0	103308140060	510702196601115451	1	47	2	3	2	1	3	3	2	4	1	1	160	64.5	67	25.1953	71	117	16	0	\N	\N	0.12	\N	\N	0	0	0.333	1.94	0.12	\N	\N	\N	\N	\N	\N	\N	\N	\N	\N	1966-01-11 00:00:00	贾贵树	510702196601115451
4	300	2	2	0	103310230028	510702196909205429	2	44	2	2	2	1	1	3	1	\N	1	1	152	50.6	76	21.901	67	113	36	78.39	\N	\N	0.28	\N	\N	0	78.39	0.278	1.56	0.28	\N	\N	\N	\N	\N	\N	\N	\N	\N	\N	1969-09-20 00:00:00	谢明芳	510702196909205429
4	304	2	1	0	103309090039	510703199411153123	2	18	1	1	1	1	1	3	1	\N	1	1	159	66	82	26.1066	50	96	45	29.3	\N	\N	1.89	\N	\N	0.03	29.3	\N	\N	1.89	\N	\N	\N	\N	\N	\N	\N	\N	\N	\N	1994-11-15 00:00:00	杨琳	510703199411153123
4	305	2	1	0	103309090040	510702197608255427	2	37	2	2	2	1	1	3	1	\N	1	1	158	75.5	87	30.2436	73	117	43	11.7	\N	\N	0.903	\N	\N	0.02	11.7	\N	\N	0.903	\N	\N	\N	\N	\N	\N	\N	\N	\N	\N	1976-08-25 00:00:00	杨晓丽	510702197608255427
4	306	2	1	0	103309270133	512921197308156138	1	40	2	2	2	1	3	3	1	\N	1	2	165	63.5	82	23.3242	89	146	46	948.2	\N	\N	0.005	\N	\N	0.01	948.2	\N	\N	0.005	\N	\N	\N	\N	\N	\N	\N	\N	\N	\N	1973-08-15 00:00:00	陈昌胜	512921197308156138
4	307	2	1	0	103311080002	510703199501153119	1	18	1	1	1	1	1	3	1	\N	1	1	156	58	74	23.833	76	140	15	-2	\N	\N	1.94	\N	\N	0.01	-2	\N	\N	1.94	\N	\N	\N	\N	\N	\N	\N	\N	\N	\N	1995-01-15 00:00:00	赖爽	510703199501153119
4	308	2	1	0	103311080003	51070219550110542X	2	58	3	3	3	1	1	3	1	\N	1	1	145	44.8	74	21.308	86	136	30	6.4	\N	\N	0.005	\N	\N	0.01	6.4	\N	\N	0.005	\N	\N	\N	\N	\N	\N	\N	\N	\N	\N	1955-01-10 00:00:00	赖晴晞	51070219550110542X
4	318	2	2	0	103309190023	510703199001203116	1	23	1	1	1	1	3	3	2	2	1	1	168	58.8	71	20.8333	77	132	23	17.9	\N	\N	0.005	\N	\N	0.01	17.9	\N	\N	0.005	\N	\N	\N	\N	\N	\N	\N	\N	\N	\N	1990-01-20 00:00:00	向东伯	510703199001203116
4	329	2	1	0	103309120055	510702195608105411	1	57	3	3	3	1	1	3	1	2	2	1	160	61.8	82	24.1406	71	149	62	20.16	\N	\N	0.25	\N	\N	0	20.16	0.333	1.47	0.25	\N	\N	\N	\N	\N	\N	\N	\N	\N	\N	1956-08-10 00:00:00	谢志友	510702195608105411
4	336	2	1	0	103309040073	510702196502265411	1	48	2	3	2	1	1	3	1	\N	1	1	165	55.7	73	20.4591	84	142	24	151.51	\N	\N	0.34	\N	\N	0	151.51	0.286	1.88	0.34	\N	\N	\N	\N	\N	\N	\N	\N	\N	\N	1965-02-26 00:00:00	王明富	510702196502265411
4	345	2	2	0	103309180089	510602197106295124	2	42	2	2	2	1	1	3	1	\N	1	1	160	55.8	70	21.7969	75	121	13	89.23	\N	\N	0.1	\N	\N	0	89.23	0.344	1.77	0.1	\N	\N	\N	\N	\N	\N	\N	\N	\N	\N	1971-06-29 00:00:00	廖玉蓉	510602197106295124
4	352	2	2	0	103310040105	510703199307213122	2	20	1	1	1	1	2	3	1	\N	1	1	165	60	68	22.0386	86	115	15	285.78	\N	\N	9.3	\N	\N	0	285.78	0.307	0.45	9.3	\N	\N	\N	\N	\N	\N	\N	\N	\N	\N	1993-07-21 00:00:00	阳文君	510703199307213122
4	354	2	2	0	103309050043	510703198903193119	1	24	1	1	1	1	1	3	2	3	1	1	168	70	84	24.8016	85	114	19	0.5	\N	\N	5.56	\N	\N	0	0.5	0.301	0.69	5.56	\N	\N	\N	\N	\N	\N	\N	\N	\N	\N	1989-03-19 00:00:00	李伟	510703198903193119
4	363	2	1	0	103310230008	510726197411231414	1	38	2	2	2	2	1	3	1	\N	1	1	160	56.7	80	22.1484	99	133	68	39.69	\N	\N	0.26	\N	\N	0	39.69	0.3	1.75	0.26	\N	\N	\N	\N	\N	\N	\N	\N	\N	\N	1974-11-23 00:00:00	薛豹	510726197411231414
4	394	2	1	0	103310080022	510702196209095425	2	51	3	3	3	1	1	3	1	2	1	1	140	49.7	78	25.3571	87	148	37	1.97	\N	\N	6.13	\N	\N	0	1.97	0.333	0.37	6.13	\N	\N	\N	\N	\N	\N	\N	\N	\N	\N	1962-09-09 00:00:00	吴明玉	510702196209095425
4	405	2	1	0	103309230046	510702196412065424	2	48	2	3	2	1	1	3	1	\N	1	2	161	75.5	100	29.127	96	169	43	34.13	\N	\N	0.41	\N	\N	0	34.13	0.285	1.54	0.41	\N	\N	\N	\N	\N	\N	\N	\N	\N	\N	1964-12-06 00:00:00	黄清珍	510702196412065424
4	407	2	2	0	103308010074	510702195609075410	1	56	3	3	3	1	3	3	2	3	1	1	176	67.9	90	21.9202	84	138	51	16.49	\N	\N	10.65	\N	\N	0	16.49	0.823	0.5	10.65	\N	\N	\N	\N	\N	\N	\N	\N	\N	\N	1956-09-07 00:00:00	曾荣贵	510702195609075410
4	409	2	1	0	103310040163	510702197405025015	1	39	2	2	2	1	1	3	1	4	1	1	165	67.8	85	24.9036	90	148	70	72.84	\N	\N	4.21	\N	\N	0	72.84	0.295	1.23	4.21	\N	\N	\N	\N	\N	\N	\N	\N	\N	\N	1974-05-02 00:00:00	何勇	510702197405025015
4	410	2	1	0	103310040162	510703199408162643	2	19	1	1	1	1	2	3	1	\N	1	1	163	48	62	18.0662	64	119	9	14.97	\N	\N	0.1	\N	\N	0	14.97	0.311	1.86	0.1	\N	\N	\N	\N	\N	\N	\N	\N	\N	\N	1994-08-16 00:00:00	何晓凤	510703199408162643
4	411	2	2	0	103309280137	510702196810085017	1	44	2	2	2	1	1	3	1	2	1	1	160	64.6	100	25.2344	77	114	21	25.47	\N	\N	5.5	\N	\N	0	25.47	0.305	0.63	5.5	\N	\N	\N	\N	\N	\N	\N	\N	\N	\N	1968-10-08 00:00:00	何军	510702196810085017
4	418	2	1	0	103309060052	511321198611016323	2	26	1	1	1	1	1	3	1	\N	1	1	150	42.6	66	18.9333	72	117	17	1.28	\N	\N	0.15	\N	\N	0.04	1.28	0.495	1.64	0.15	\N	\N	\N	\N	\N	\N	\N	\N	\N	\N	1986-11-01 00:00:00	孙金花	511321198611016323
4	430	2	1	0	103401160001	510702195806055419	1	55	3	3	3	1	1	3	2	4	1	1	150	49.3	74	21.9111	74	128	18	117.45	\N	\N	7.95	\N	\N	0	117.45	0.338	0.08	7.95	\N	\N	\N	\N	\N	\N	\N	\N	\N	\N	1958-06-05 00:00:00	谢深奉	510702195806055419
4	431	2	2	0	103309250083	510702195905165410	1	54	3	3	3	1	1	3	2	4	1	1	162	62.6	81	23.8531	68	121	41	29.06	\N	\N	2.92	\N	\N	0	29.06	0.344	1.38	2.92	\N	\N	\N	\N	\N	\N	\N	\N	\N	\N	1959-05-16 00:00:00	唐清怀	510702195905165410
4	433	2	2	0	103311060047	510703198311253114	1	29	1	1	1	1	1	3	2	\N	1	1	160	71.5	88	27.9297	83	151	59	0.37	\N	\N	0.13	\N	\N	0	0.37	0.359	1.72	0.13	\N	\N	\N	\N	\N	\N	\N	\N	\N	\N	1983-11-25 00:00:00	李大健	510703198311253114
4	434	2	1	0	103311050037	510703198804123123	2	25	1	1	1	1	3	3	1	\N	1	1	155	74.6	96	31.051	63	110	68	>1000	\N	\N	9.66	\N	\N	0	>1000	0.315	0.36	9.66	\N	\N	\N	\N	\N	\N	\N	\N	\N	\N	1988-04-12 00:00:00	李辉涛	510703198804123123
4	436	2	2	0	103309160093	510702197712185414	1	35	2	2	2	1	1	3	2	2	1	1	176	83.3	92	26.8918	78	116	32	2.67	\N	\N	7.66	\N	\N	0	2.67	0.31	0.79	7.66	\N	\N	\N	\N	\N	\N	\N	\N	\N	\N	1977-12-18 00:00:00	杨定超	510702197712185414
4	439	2	1	0	103308190023	510703199404163120	2	19	1	1	1	1	1	3	1	\N	1	1	153	42.5	64	18.1554	61	98	12	0.85	\N	\N	0.14	\N	\N	0	0.85	0.336	1.67	0.14	\N	\N	\N	\N	\N	\N	\N	\N	\N	\N	1994-04-16 00:00:00	雷娟	510703199404163120
4	451	2	1	0	103308200058	510702195804285421	2	55	3	3	3	1	1	3	1	\N	1	1	156	63.7	80	26.1752	77	117	34	53.12	\N	\N	3.72	\N	\N	0.01	53.12	1.126	0.53	3.72	\N	\N	\N	\N	\N	\N	\N	\N	\N	\N	1958-04-28 00:00:00	姚显芳	510702195804285421
4	460	2	1	0	103308290016	510702196305275418	1	50	3	3	3	1	1	3	2	2	1	1	158.1	48	65	19.2034	73	132	14	3.69	\N	\N	1.21	\N	\N	0	3.69	0.342	1.15	1.21	\N	\N	\N	\N	\N	\N	\N	\N	\N	\N	1963-05-27 00:00:00	胡有全	510702196305275418
4	473	2	2	0	103311160006	510702197508275420	2	38	2	2	2	1	1	3	1	\N	1	1	158	62.8	82	25.1562	74	108	24	49.17	\N	\N	8.54	\N	\N	0	49.17	0.319	0.21	8.54	\N	\N	\N	\N	\N	\N	\N	\N	\N	\N	1975-08-27 00:00:00	郭永蓉	510702197508275420
4	486	2	2	0	103310210026	510703198111133126	2	31	2	2	2	1	1	3	1	3	1	1	150	46.4	70	20.6222	72	108	6	0	\N	\N	1.84	\N	\N	0	0	0.318	0.21	1.84	\N	\N	\N	\N	\N	\N	\N	\N	\N	\N	1981-11-13 00:00:00	唐红梅	510703198111133126
4	489	2	2	0	103309200091	510703199503063125	2	18	1	1	1	1	1	3	1	\N	1	1	155	43.1	64	17.9396	62	96	11	0.02	\N	\N	0.08	\N	\N	0	0.02	0.311	1.64	0.08	\N	\N	\N	\N	\N	\N	\N	\N	\N	\N	1995-03-06 00:00:00	李雪	510703199503063125
4	496	2	2	0	103310110019	510727198006030820	2	33	2	2	2	1	1	3	1	\N	1	1	160	57.6	74	22.5	67	109	15	0	\N	\N	0.16	\N	\N	0	0	0.336	2.03	0.16	\N	\N	\N	\N	\N	\N	\N	\N	\N	\N	1980-06-03 00:00:00	曹志玉	510727198006030820
4	499	2	2	0	103309260174	510703199106043112	1	22	1	1	1	1	1	3	1	\N	1	1	170	47.2	62	16.3322	71	115	32	0	\N	\N	0.04	\N	\N	0	0	0.339	1.85	0.04	\N	\N	\N	\N	\N	\N	\N	\N	\N	\N	1991-06-04 00:00:00	赵俊	510703199106043112
4	507	2	2	0	103310080039	510921198911185163	2	23	1	1	1	1	1	3	1	2	1	1	150	50.3	74	22.3556	63	136	14	7.43	\N	\N	0.1	\N	\N	0.06	7.43	0.606	1.39	0.1	\N	\N	\N	\N	\N	\N	\N	\N	\N	\N	1989-11-18 00:00:00	唐琴	510921198911185163
4	511	2	2	0	103310040187	510702197402115437	1	39	2	2	2	1	1	3	1	3	1	1	157	62.9	88	25.5183	103	155	42	0.43	\N	\N	11.04	\N	\N	16.22	0.43	0.297	0.01	11.04	\N	\N	\N	\N	\N	\N	\N	\N	\N	\N	1974-02-11 00:00:00	郭斯洪	510702197402115437
4	518	2	1	0	103309230112	510703197905082629	2	34	2	2	2	1	1	3	1	3	1	1	162	60.4	76	23.0148	55	102	22	37.2	\N	\N	0.005	\N	\N	0.01	37.2	\N	\N	0.005	\N	\N	\N	\N	\N	\N	\N	\N	\N	\N	1979-05-08 00:00:00	李友琼	510703197905082629
4	526	2	2	0	103309050005	510703198709173157	1	25	1	1	1	1	1	3	2	2	1	1	173	69.7	82	23.2884	81	137	28	-2	\N	\N	1.96	\N	\N	-2	-2	\N	\N	1.96	\N	\N	\N	\N	\N	\N	\N	\N	\N	\N	1987-09-17 00:00:00	刘波	510703198709173157
4	537	2	2	0	103401230011	510626199506015128	2	18	1	1	1	1	1	3	1	\N	1	1	158	49	70	19.6283	86	114	9	0.04	\N	\N	0.36	\N	\N	0	0.04	0.311	1.74	0.36	\N	\N	\N	\N	\N	\N	\N	\N	\N	\N	1995-06-01 00:00:00	梁程	510626199506015128
4	540	2	2	0	103311060018	510703198611292625	2	26	1	1	1	1	3	3	1	\N	1	1	166	48.1	72	17.4554	64	109	24	0	\N	\N	0.19	\N	\N	0	0	0.335	1.58	0.19	\N	\N	\N	\N	\N	\N	\N	\N	\N	\N	1986-11-29 00:00:00	唐燕	510703198611292625
4	544	2	1	0	103311060066	510703199403223128	2	19	1	1	1	1	2	3	1	\N	1	1	158	45.2	65	18.1061	61	106	22	124.4	\N	\N	1.84	\N	\N	-2	124.4	\N	\N	1.84	\N	\N	\N	\N	\N	\N	\N	\N	\N	\N	1994-03-22 00:00:00	李雪梅	510703199403223128
4	547	2	2	0	103310180051	510626198701025327	2	26	1	1	1	1	3	3	1	\N	1	1	160	67.6	78	26.4062	87	146	13	108.31	\N	\N	7.01	\N	\N	0	108.31	0.304	0.26	7.01	\N	\N	\N	\N	\N	\N	\N	\N	\N	\N	1987-01-02 00:00:00	姚珊	510626198701025327
4	549	2	2	0	103311080049	510703198704132823	2	26	1	1	1	1	1	3	1	2	1	1	155	65	80	27.0552	73	123	15	199.32	\N	\N	0.12	\N	\N	0	199.32	0.623	0.03	0.12	\N	\N	\N	\N	\N	\N	\N	\N	\N	\N	1987-04-13 00:00:00	王小燕	510703198704132823
4	552	2	1	0	103310200023	510703198405293117	1	29	1	1	1	1	1	3	2	\N	1	1	174	74.3	90	24.5409	69	123	85	0.48	\N	\N	5.62	\N	\N	1.24	0.48	2.902	0.02	5.62	\N	\N	\N	\N	\N	\N	\N	\N	\N	\N	1984-05-29 00:00:00	廖晓明	510703198405293117
4	557	2	2	0	103311040008	510921197811172723	2	34	2	2	2	1	1	3	1	\N	1	1	145	53.7	76	25.541	76	129	23	22.66	\N	\N	0.43	\N	\N	0	22.66	0.294	1.66	0.43	\N	\N	\N	\N	\N	\N	\N	\N	\N	\N	1978-11-17 00:00:00	胡小丽	510921197811172723
4	558	2	2	0	103310070004	510703198005233115	1	33	2	2	2	1	1	3	2	3	1	1	166	49.4	72	17.9271	67	108	46	0.11	\N	\N	4.35	\N	\N	0	0.11	0.307	1.78	4.35	\N	\N	\N	\N	\N	\N	\N	\N	\N	\N	1980-05-23 00:00:00	肖杰	510703198005233115
4	559	2	2	0	103310070005	510702197812035421	2	34	2	2	2	1	2	3	1	\N	1	1	152	49.3	70	21.3383	58	89	20	1.91	\N	\N	6.87	\N	\N	0	1.91	0.333	1.39	6.87	\N	\N	\N	\N	\N	\N	\N	\N	\N	\N	1978-12-03 00:00:00	周晓春	510702197812035421
4	565	2	1	0	103311090010	510703198605223113	1	27	1	1	1	1	1	3	1	\N	1	1	175	88.9	96	29.0286	85	125	41	0	\N	\N	0.11	\N	\N	0	0	0.321	1.86	0.11	\N	\N	\N	\N	\N	\N	\N	\N	\N	\N	1986-05-22 00:00:00	向华	510703198605223113
4	569	2	2	0	103310220062	510822199212306822	2	20	1	1	1	1	1	3	1	2	1	1	155	70	83	29.1363	58	109	13	0.01	\N	\N	0.1	\N	\N	0	0.01	0.334	2.01	0.1	\N	\N	\N	\N	\N	\N	\N	\N	\N	\N	1992-12-30 00:00:00	田瑶	510822199212306822
4	573	2	1	0	103308050020	510702197708315626	2	35	2	2	2	1	1	3	1	\N	1	1	153	54.3	82	23.1962	73	127	14	10.19	\N	\N	0.14	\N	\N	0.01	10.19	0.366	1.7	0.14	\N	\N	\N	\N	\N	\N	\N	\N	\N	\N	1977-08-31 00:00:00	贾明华	510702197708315626
4	575	2	2	0	103310040097	510703198910103126	2	23	1	1	1	1	1	3	1	\N	1	1	155	38.1	58	15.8585	64	103	16	293.55	\N	\N	0.01	\N	\N	0	293.55	0.295	6.46	0.01	\N	\N	\N	\N	\N	\N	\N	\N	\N	\N	1989-10-10 00:00:00	贾雯雯	510703198910103126
4	579	2	2	0	103309130009	510726198608281436	1	27	1	1	1	2	1	3	2	3	1	1	176	75.3	86	24.3091	57	118	18	0.32	\N	\N	0.09	\N	\N	0	0.32	0.314	1.82	0.09	\N	\N	\N	\N	\N	\N	\N	\N	\N	\N	1986-08-28 00:00:00	谷兵	510726198608281436
4	581	2	2	0	103309270095	510703198702053136	1	26	1	1	1	1	1	3	2	4	1	1	150	57.5	82	25.5556	92	147	121	5.14	\N	\N	0.68	\N	\N	0	5.14	0.307	1.68	0.68	\N	\N	\N	\N	\N	\N	\N	\N	\N	\N	1987-02-05 00:00:00	李守金	510703198702053136
4	587	2	2	0	103310180010	510703199408153122	2	19	1	1	1	1	2	3	1	\N	1	1	163	46	59	17.3134	56	86	7	8.28	\N	\N	0.31	\N	\N	0	8.28	0.3	1.84	0.31	\N	\N	\N	\N	\N	\N	\N	\N	\N	\N	1994-08-15 00:00:00	廖雪	510703199408153122
4	588	2	2	0	103310310021	510722198202207601	2	31	2	2	2	1	1	3	1	\N	1	1	156	58.8	84	24.1617	74	129	41	6.152	\N	\N	1.01	\N	\N	0	6.152	0.345	1.72	1.01	\N	\N	\N	\N	\N	\N	\N	\N	\N	\N	1982-02-20 00:00:00	文华琼	510722198202207601
4	602	2	2	0	103309180037	51070319920325312X	2	21	1	1	1	1	1	3	1	\N	1	1	160	56.3	72	21.9922	60	98	16	42.34	\N	\N	0.15	\N	\N	0	42.34	0.327	1.8	0.15	\N	\N	\N	\N	\N	\N	\N	\N	\N	\N	1992-03-25 00:00:00	刘敏	51070319920325312X
4	603	2	1	0	103310270040	510703199304203113	1	20	1	1	1	1	1	3	1	\N	1	1	166	58.7	70	21.3021	93	133	20	0	\N	\N	0.14	\N	\N	0	0	0.323	1.82	0.14	\N	\N	\N	\N	\N	\N	\N	\N	\N	\N	1993-04-20 00:00:00	廖斌智	510703199304203113
4	607	2	2	0	103401250027	510703199708013113	1	16	1	1	1	1	1	3	2	2	1	1	166	55.9	72	20.286	60	116	20	0	\N	\N	0.2	\N	\N	0	0	0.304	1.84	0.2	\N	\N	\N	\N	\N	\N	\N	\N	\N	\N	1997-08-01 00:00:00	粟川	510703199708013113
4	609	2	2	0	103308070052	510703198011243117	1	32	2	2	2	1	1	3	2	4	1	1	170	59.7	78	20.6574	87	135	18	6.7	\N	\N	8.06	\N	\N	0	6.7	0.34	0.83	8.06	\N	\N	\N	\N	\N	\N	\N	\N	\N	\N	1980-11-24 00:00:00	王明祖	510703198011243117
4	611	2	1	0	103311080073	510703198902043119	1	24	1	1	1	1	1	3	1	\N	1	1	165	62.2	72	22.8466	64	111	17	51.85	\N	\N	8.9	\N	\N	0	51.85	0.312	0.72	8.9	\N	\N	\N	\N	\N	\N	\N	\N	\N	\N	1989-02-04 00:00:00	周超	510703198902043119
4	618	2	2	0	103310270012	510703199512243136	1	17	1	1	1	1	2	3	1	\N	1	1	170	50.9	66	17.6125	78	124	8	44.9	\N	\N	1.94	\N	\N	0.03	44.9	\N	\N	1.94	\N	\N	\N	\N	\N	\N	\N	\N	\N	\N	1995-12-24 00:00:00	周连彬	510703199512243136
4	620	2	2	0	103310180026	511023199008250968	2	23	1	1	1	1	1	3	1	\N	1	1	140	46.2	70	23.5714	56	103	33	0.3	\N	\N	0.14	\N	\N	0	0.3	0.277	1.74	0.14	\N	\N	\N	\N	\N	\N	\N	\N	\N	\N	1990-08-25 00:00:00	蒋晓燕	511023199008250968
4	622	2	1	0	103311130015	510923198912095242	2	23	1	1	1	1	1	3	1	\N	1	1	158	56.4	76	22.5925	73	120	14	53.04	\N	\N	6.8	\N	\N	0	53.04	0.304	1.53	6.8	\N	\N	\N	\N	\N	\N	\N	\N	\N	\N	1989-12-09 00:00:00	彭明蓉	510923198912095242
4	623	2	1	0	103310070046	510703199001113129	2	23	1	1	1	1	2	3	1	\N	1	1	159	44.3	56	17.523	70	108	9	0.05	\N	\N	0.13	\N	\N	0	0.05	0.335	1.2	0.13	\N	\N	\N	\N	\N	\N	\N	\N	\N	\N	1990-01-11 00:00:00	李丹丹	510703199001113129
4	625	2	2	0	103310060070	510703198601203123	2	27	1	1	1	1	1	3	1	\N	1	1	160	43.6	72	17.0312	55	96	28	84.9	\N	\N	0.005	\N	\N	0.04	84.9	\N	\N	0.005	\N	\N	\N	\N	\N	\N	\N	\N	\N	\N	1986-01-20 00:00:00	邓杨	510703198601203123
4	627	2	1	0	103311120006	510703199309183115	1	20	1	1	1	1	1	3	2	\N	1	1	170	49.9	76	17.2664	67	111	11	15.7	\N	\N	1.78	\N	\N	0.01	15.7	\N	\N	1.78	\N	\N	\N	\N	\N	\N	\N	\N	\N	\N	1993-09-18 00:00:00	刘振	510703199309183115
4	628	2	1	0	103310070065	510703198707283125	2	26	1	1	1	1	1	3	1	\N	1	1	154	61	84	25.721	74	111	20	335	\N	\N	0.005	\N	\N	0.01	335	\N	\N	0.005	\N	\N	\N	\N	\N	\N	\N	\N	\N	\N	1987-07-28 00:00:00	唐建华	510703198707283125
4	631	2	2	0	103310190025	510703199504173123	2	18	1	1	1	1	3	3	1	\N	1	1	165	57	78	20.9366	68	119	24	139	\N	\N	1.91	\N	\N	0.01	139	\N	\N	1.91	\N	\N	\N	\N	\N	\N	\N	\N	\N	\N	1995-04-17 00:00:00	杨青青	510703199504173123
4	632	2	1	0	103309250041	510703199501013116	1	18	1	1	1	1	2	3	1	2	1	1	170	52.1	68	18.0277	81	131	17	0.01	\N	\N	0.13	\N	\N	0	0.01	0.288	0.288	0.13	\N	\N	\N	\N	\N	\N	\N	\N	\N	\N	1995-01-01 00:00:00	罗文文	510703199501013116
4	634	2	2	0	103310040033	510703199712163114	1	15	1	1	1	1	2	3	1	\N	1	1	178	60.9	74	19.2211	83	137	16	-2	\N	\N	1.85	\N	\N	0.01	-2	\N	\N	1.85	\N	\N	\N	\N	\N	\N	\N	\N	\N	\N	1997-12-16 00:00:00	杨俊	510703199712163114
4	641	2	2	0	103309300059	510703199510183125	2	17	1	1	1	1	2	3	1	\N	1	1	160	45.2	64	17.6563	65	99	11	90.55	\N	\N	0.26	\N	\N	0	90.55	0.295	1.89	0.26	\N	\N	\N	\N	\N	\N	\N	\N	\N	\N	1995-10-18 00:00:00	谢珊	510703199510183125
4	642	2	1	0	103309250141	510703199412203129	2	18	1	1	1	1	2	3	1	\N	1	1	164	54.3	72	20.1889	73	122	18	3.88	\N	\N	0.19	\N	\N	0	3.88	0.311	1.8	0.19	\N	\N	\N	\N	\N	\N	\N	\N	\N	\N	1994-12-20 00:00:00	黄蓉	510703199412203129
4	644	2	2	0	103309250022	51070319910426312X	2	22	1	1	1	1	2	3	1	\N	1	1	161	58.7	72	22.6457	73	120	35	1.07	\N	\N	0.1	\N	\N	0	1.07	0.311	1.47	0.1	\N	\N	\N	\N	\N	\N	\N	\N	\N	\N	1991-04-26 00:00:00	赵婷婷	51070319910426312X
4	645	2	1	0	103311030066	510703199701083119	1	16	1	1	1	1	1	3	1	\N	1	1	165	55.7	68	20.4591	116	139	16	656.35	\N	\N	0.19	\N	\N	0	656.35	0.316	1.83	0.19	\N	\N	\N	\N	\N	\N	\N	\N	\N	\N	1997-01-08 00:00:00	赵进宝	510703199701083119
4	647	2	1	0	103311010036	510703199410103124	2	19	1	1	1	1	1	3	1	\N	1	1	160	54.2	74	21.1719	65	116	19	1.22	\N	\N	0.17	\N	\N	0	1.22	0.259	1.65	0.17	\N	\N	\N	\N	\N	\N	\N	\N	\N	\N	1994-10-10 00:00:00	唐倩	510703199410103124
4	651	1	2	0	106307180002	510703198312180228	2	29	1	1	1	1	1	1	1	\N	1	1	153	80	101	34.1749	80	120	31	227.73	\N	\N	0.13	\N	\N	0	227.73	0.339	1.91	0.13	\N	\N	\N	\N	\N	\N	\N	\N	\N	\N	1983-12-18 00:00:00	甄雪	510703198312180228
4	683	1	2	0	106311020001	510702196512173115	1	47	2	3	2	1	1	1	1	\N	1	1	158	55	65	22.0317	72	128	28	72.77	\N	\N	7.81	\N	\N	0	72.77	0.347	0.59	7.81	\N	\N	\N	\N	\N	\N	\N	\N	\N	\N	1965-12-17 00:00:00	苏韩明	510702196512173115
4	711	1	2	0	106311100016	510702197302033127	2	40	2	2	2	1	1	1	1	\N	1	1	145	45	72	21.4031	70	112	31	0	\N	\N	0.15	\N	\N	0	0	0.31	1.87	0.15	\N	\N	\N	\N	\N	\N	\N	\N	\N	\N	1973-02-03 00:00:00	魏晓燕	510702197302033127
4	715	1	2	0	106311100042	510726197403176021	2	39	2	2	2	1	1	1	1	\N	1	1	150	51	64	22.6667	90	150	14	0	\N	\N	0.12	\N	\N	0	0	0.332	1.94	0.12	\N	\N	\N	\N	\N	\N	\N	\N	\N	\N	1974-03-17 00:00:00	李玉华	510726197403176021
4	716	1	2	0	106310130106	510781198210160866	2	30	2	2	2	1	1	3	1	\N	1	1	158	48	60	19.2277	60	110	21	0	\N	\N	0.17	\N	\N	0	0	0.367	1.79	0.17	\N	\N	\N	\N	\N	\N	\N	\N	\N	\N	1982-10-16 00:00:00	唐芙蓉	510781198210160866
4	720	1	2	0	106310110126	510702195704183129	2	56	3	3	3	1	1	1	1	\N	1	1	143	52	76	25.4291	60	100	20	0.03	\N	\N	11.21	\N	\N	48.93	0.03	0.362	0.01	11.21	\N	\N	\N	\N	\N	\N	\N	\N	\N	\N	1957-04-18 00:00:00	万琼华	510702195704183129
4	721	1	2	0	106311010014	510704198606252713	1	27	1	1	1	1	2	3	1	2	1	1	177	70	78	22.3435	66	127	31	3.1	\N	\N	5.96	\N	\N	0	3.1	0.319	1.55	5.96	\N	\N	\N	\N	\N	\N	\N	\N	\N	\N	1986-06-25 00:00:00	何林	510704198606252713
4	722	1	2	0	106311010013	510703198608212444	2	27	1	1	1	1	2	1	1	\N	1	1	167	65	82	23.3067	56	106	94	3.76	\N	\N	0.09	\N	\N	0	3.76	0.353	1.91	0.09	\N	\N	\N	\N	\N	\N	\N	\N	\N	\N	1986-08-21 00:00:00	宋楠	510703198608212444
4	734	1	2	0	106311040060	510703199002012418	1	23	1	1	1	1	1	1	1	2	1	1	172	75	80	25.3515	68	138	31	0.22	\N	\N	0.13	\N	\N	0.07	0.22	1.228	1.33	0.13	\N	\N	\N	\N	\N	\N	\N	\N	\N	\N	1990-02-01 00:00:00	黄凡	510703199002012418
4	768	1	2	0	106310090130	510702196007213112	1	53	3	3	3	1	1	3	2	3	1	1	170	73	87	25.2595	60	114	14	2.41	\N	\N	0.19	\N	\N	0	2.41	0.388	1.59	0.19	\N	\N	\N	\N	\N	\N	\N	\N	\N	\N	1960-07-21 00:00:00	刘太友	510702196007213112
4	773	1	2	0	106307180005	510702196012300245	2	52	3	3	3	1	3	3	1	\N	1	1	152	44	76	19.0443	58	96	24	11.87	\N	\N	8.28	\N	\N	0	11.87	0.319	0.37	8.28	\N	\N	\N	\N	\N	\N	\N	\N	\N	\N	1960-12-30 00:00:00	彭桂花	510702196012300245
4	787	1	2	0	106310130025	510703199104222432	1	22	1	1	1	1	2	1	1	\N	1	1	155	42	57	17.4818	80	130	42	1.65	\N	\N	1.99	\N	\N	0.24	1.65	0.834	0.11	1.99	\N	\N	\N	\N	\N	\N	\N	\N	\N	\N	1991-04-22 00:00:00	钟冬	510703199104222432
4	791	1	2	0	106310160007	510702196904063118	1	44	2	2	2	1	1	1	2	2	1	1	145	43	65	20.4518	80	118	30	0.18	\N	\N	10.94	\N	\N	85.28	0.18	0.315	0.02	10.94	\N	\N	\N	\N	\N	\N	\N	\N	\N	\N	1969-04-06 00:00:00	冯德友	510702196904063118
4	805	1	2	0	106310180137	510703198510152447	2	28	1	1	1	1	1	1	1	\N	1	1	151	45	68	19.736	66	106	39	20.19	\N	\N	0.11	\N	\N	0	20.19	0.334	1.62	0.11	\N	\N	\N	\N	\N	\N	\N	\N	\N	\N	1985-10-15 00:00:00	涂杨	510703198510152447
4	820	1	2	0	106311020011	510703197208052424	2	41	2	2	2	1	2	1	1	\N	1	1	153	60	74	25.6312	76	128	26	0.18	\N	\N	5.15	\N	\N	0	0.18	0.334	1.49	5.15	\N	\N	\N	\N	\N	\N	\N	\N	\N	\N	1972-08-05 00:00:00	刘凤琼	510703197208052424
4	822	1	2	0	106310290041	510702197302063115	1	40	2	2	2	1	1	1	3	2	1	1	170	75	84	25.9516	78	120	48	9.56	\N	\N	9.14	\N	\N	0	9.56	0.315	0.72	9.14	\N	\N	\N	\N	\N	\N	\N	\N	\N	\N	1973-02-06 00:00:00	陈达荣	510702197302063115
4	844	1	2	0	106310280196	510703199106042419	1	22	1	1	1	1	2	1	2	2	1	1	175	65	72	21.2245	60	106	27	0.01	\N	\N	0.09	\N	\N	0	0.01	0.364	2.08	0.09	\N	\N	\N	\N	\N	\N	\N	\N	\N	\N	1991-06-04 00:00:00	杨凡	510703199106042419
4	851	1	2	0	106310140136	142729199005025149	2	23	1	1	1	1	1	1	1	\N	1	1	167	45	56	16.1354	68	102	10	0.05	\N	\N	0.09	\N	\N	0	0.05	0.35	1.69	0.09	\N	\N	\N	\N	\N	\N	\N	\N	\N	\N	1990-05-02 00:00:00	李月娜	142729199005025149
4	854	1	2	0	106311100038	510703199211272419	1	20	1	1	1	1	3	1	1	\N	1	1	173	64	71	21.3839	72	124	14	0.08	\N	\N	0.09	\N	\N	0	0.08	0.356	2.01	0.09	\N	\N	\N	\N	\N	\N	\N	\N	\N	\N	1992-11-27 00:00:00	刘旭东	510703199211272419
4	856	1	2	0	106310130037	51070219570803311X	1	56	3	3	3	1	3	1	2	4	3	3	160	73	96	28.5156	82	128	28	30.28	\N	\N	3.01	\N	\N	0.01	30.28	0.398	1.54	3.01	\N	\N	\N	\N	\N	\N	\N	\N	\N	\N	1957-08-03 00:00:00	刘太文	51070219570803311X
4	864	1	2	0	106308120014	510702196306253114	1	50	3	3	3	1	3	1	2	4	1	1	163	50	74	18.8189	68	114	21	-2	\N	\N	0.004	\N	\N	0.03	-2	\N	\N	0.004	\N	\N	\N	\N	\N	\N	\N	\N	\N	\N	1963-06-25 00:00:00	魏定贵	510702196306253114
4	883	1	2	0	106311070065	510721197301160705	2	40	2	2	2	1	3	3	1	\N	1	1	163	68	61	25.5937	62	118	29	0	\N	\N	0.15	\N	\N	0	0	0.304	1.87	0.15	\N	\N	\N	\N	\N	\N	\N	\N	\N	\N	1973-01-16 00:00:00	杨秀勤	510721197301160705
4	884	1	2	0	106308120065	510702197112203113	1	41	2	2	2	1	3	1	1	3	1	1	167	58	78	20.7967	110	122	19	0.59	\N	\N	9.05	\N	\N	0	0.59	0.322	0.83	9.05	\N	\N	\N	\N	\N	\N	\N	\N	\N	\N	1971-12-20 00:00:00	王志军	510702197112203113
4	885	1	2	0	106308260014	510703198701072466	2	26	1	1	1	1	3	1	1	\N	1	1	152	38	58	16.4474	66	96	13	19.91	\N	\N	6.32	\N	\N	0	19.91	0.333	0.17	6.32	\N	\N	\N	\N	\N	\N	\N	\N	\N	\N	1987-01-07 00:00:00	毛建华	510703198701072466
4	937	1	2	0	106310160143	510702197102143129	2	42	2	2	2	1	1	1	1	\N	1	1	157	60	72	24.3418	74	110	10	0.1	\N	\N	8.41	\N	\N	0	0.1	0.316	0.77	8.41	\N	\N	\N	\N	\N	\N	\N	\N	\N	\N	1971-02-14 00:00:00	谭翠华	510702197102143129
4	939	1	2	0	106308210006	510703199911143917	1	13	1	1	1	1	2	1	1	\N	1	1	148	35.5	63	16.2071	\N	\N	17	41.23	\N	\N	0.11	\N	\N	0	41.23	0.29	1.75	0.11	\N	\N	\N	\N	\N	\N	\N	\N	\N	\N	1999-11-14 00:00:00	张鹏清	510703199911143917
4	944	1	2	0	106307310016	51070219640517311X	1	49	2	3	2	1	3	3	2	4	1	1	156	51	75	20.9566	96	146	33	0	\N	\N	0.46	\N	\N	2.33	0	3.679	0	0.46	\N	\N	\N	\N	\N	\N	\N	\N	\N	\N	1964-05-17 00:00:00	肖明刚	51070219640517311X
4	947	1	2	0	106311100039	510781197808165149	2	35	2	2	2	1	3	3	1	\N	1	1	156	55	75	22.6003	60	104	36	3.38	\N	\N	0.85	\N	\N	0.7	3.38	5.486	0.02	0.85	\N	\N	\N	\N	\N	\N	\N	\N	\N	\N	1978-08-16 00:00:00	黎春蓉	510781197808165149
4	950	1	2	0	106307220012	510721197308187003	2	39	2	2	2	1	2	3	1	5	1	1	160	57	82	22.2656	107	152	17	3.41	\N	\N	0.14	\N	\N	0.31	3.41	2.249	0.04	0.14	\N	\N	\N	\N	\N	\N	\N	\N	\N	\N	1973-08-18 00:00:00	李成秀	510721197308187003
4	952	1	1	0	106311060079	510823198602147267	2	27	1	1	1	1	1	3	1	\N	1	1	160	57	73	22.2656	62	124	11	0	\N	\N	0.23	\N	\N	0.63	0	2.709	0.01	0.23	\N	\N	\N	\N	\N	\N	\N	\N	\N	\N	1986-02-14 00:00:00	李林清	510823198602147267
4	955	1	2	0	106308020061	510702195410183115	1	58	3	3	3	1	2	3	3	4	1	1	162	62	86	23.6244	72	114	33	10.47	\N	\N	0.5	\N	\N	0.29	10.47	1.915	0.04	0.5	\N	\N	\N	\N	\N	\N	\N	\N	\N	\N	1954-10-18 00:00:00	魏永烈	510702195410183115
4	956	1	2	0	106308020047	510702195505133129	2	58	3	3	3	1	2	3	1	\N	3	1	158	76	103	30.4438	92	150	26	0	\N	\N	2.98	\N	\N	0.64	0	1.66	0	2.98	\N	\N	\N	\N	\N	\N	\N	\N	\N	\N	1955-05-13 00:00:00	王琼芳	510702195505133129
4	958	1	1	0	106310300194	510702196904013110	1	44	2	2	2	1	1	3	3	2	1	1	152	53	74	22.9398	78	112	28	8.65	\N	\N	2.57	\N	\N	0.11	8.65	1.157	0.01	2.57	\N	\N	\N	\N	\N	\N	\N	\N	\N	\N	1969-04-01 00:00:00	魏星	510702196904013110
4	961	1	2	0	106308020011	510702196902152846	2	44	2	2	2	1	3	3	1	\N	1	1	160	58	86	22.6562	74	136	29	1.17	\N	\N	0.75	\N	\N	0.2	1.17	1.163	0.01	0.75	\N	\N	\N	\N	\N	\N	\N	\N	\N	\N	1969-02-15 00:00:00	李晓蓉	510702196902152846
4	966	1	2	0	106307260031	51070319960224241X	1	17	1	1	1	1	2	3	1	\N	1	1	175	62	82	20.2449	66	106	24	4.58	\N	\N	0.19	\N	\N	1.48	4.58	2.692	0.01	0.19	\N	\N	\N	\N	\N	\N	\N	\N	\N	\N	1996-02-24 00:00:00	王光鸿	51070319960224241X
4	967	1	2	0	106308020015	510722197310201552	1	39	2	2	2	1	3	3	2	4	1	1	170	60	80	20.7612	66	120	20	9.49	\N	\N	1.29	\N	\N	0.36	9.49	2.086	0.01	1.29	\N	\N	\N	\N	\N	\N	\N	\N	\N	\N	1973-10-20 00:00:00	王旭东	510722197310201552
4	968	1	2	0	106310250068	510702196410223126	2	49	2	3	2	1	1	3	1	\N	1	1	163	58	74	21.83	80	118	29	4.39	\N	\N	0.27	\N	\N	0.36	4.39	1.113	1.09	0.27	\N	\N	\N	\N	\N	\N	\N	\N	\N	\N	1964-10-22 00:00:00	杨素清	510702196410223126
4	970	1	1	0	106308050011	510702196809293134	1	44	2	2	2	1	3	3	2	4	1	1	168	66	85	23.3844	94	142	33	1.87	\N	\N	3.63	\N	\N	0.59	1.87	1.469	0.08	3.63	\N	\N	\N	\N	\N	\N	\N	\N	\N	\N	1968-09-29 00:00:00	杨文军	510702196809293134
4	984	1	2	0	106307310009	510703198609062468	2	26	1	1	1	1	2	3	1	\N	1	1	168	52	71	18.424	50	93	21	26.02	\N	\N	0.15	\N	\N	0	26.02	0.362	1.88	0.15	\N	\N	\N	\N	\N	\N	\N	\N	\N	\N	1986-09-06 00:00:00	李芝芝	510703198609062468
4	990	1	2	0	106308060015	510702195611263111	1	56	3	3	3	1	1	3	2	\N	1	1	160	55	74	21.4844	68	104	35	1	\N	\N	4.84	\N	\N	0	1	0.284	1.05	4.84	\N	\N	\N	\N	\N	\N	\N	\N	\N	\N	1956-11-26 00:00:00	徐元宽	510702195611263111
4	996	1	2	0	106310260273	510702197104132829	2	42	2	2	2	1	1	3	1	2	1	1	152	74	97	32.0291	72	116	21	0	\N	\N	0.17	\N	\N	0	0	0.29	1.8	0.17	\N	\N	\N	\N	\N	\N	\N	\N	\N	\N	1971-04-13 00:00:00	李竹英	510702197104132829
4	997	1	1	0	106310260280	510702197006093117	1	43	2	2	2	1	3	3	1	2	1	1	155	65	86	27.0552	70	112	43	3.83	\N	\N	2.7	\N	\N	0	3.83	0.287	1.65	2.7	\N	\N	\N	\N	\N	\N	\N	\N	\N	\N	1970-06-09 00:00:00	陈长兵	510702197006093117
4	1001	1	1	0	106307300013	51070319860829243X	1	26	1	1	1	1	2	3	2	\N	1	1	170	82	83	28.3737	92	135	41	0	\N	\N	0.13	\N	\N	0	0	0.303	1.86	0.13	\N	\N	\N	\N	\N	\N	\N	\N	\N	\N	1986-08-29 00:00:00	陈国庆	51070319860829243X
4	1002	1	1	0	106307310002	51070219730408311X	1	40	2	2	2	1	1	3	2	4	1	1	153	49	75	20.9321	60	120	17	0.21	\N	\N	0.1	\N	\N	0	0.21	0.303	1.48	0.1	\N	\N	\N	\N	\N	\N	\N	\N	\N	\N	1973-04-08 00:00:00	刘小平	51070219730408311X
4	1009	1	2	0	106307310034	510702197105143116	1	42	2	2	2	1	3	3	2	4	1	1	168	60	77	21.2585	80	106	18	20.11	\N	\N	4.91	\N	\N	0	20.11	0.291	0.84	4.91	\N	\N	\N	\N	\N	\N	\N	\N	\N	\N	1971-05-14 00:00:00	杜军	510702197105143116
4	1029	1	1	0	106308020004	510702195510213115	1	57	3	3	3	1	3	3	2	4	1	1	162	60	74	22.8624	88	132	14	1.89	\N	\N	8.51	\N	\N	0	1.89	0.331	1.58	8.51	\N	\N	\N	\N	\N	\N	\N	\N	\N	\N	1955-10-21 00:00:00	夏治国	510702195510213115
4	1038	1	2	0	106308070047	510922197306068171	1	40	2	2	2	1	3	1	2	\N	1	1	168	60	80	21.2585	68	94	73	1.79	\N	\N	0.16	\N	\N	0.01	1.79	0.31	1.91	0.16	\N	\N	\N	\N	\N	\N	\N	\N	\N	\N	1973-06-06 00:00:00	罗明洪	510922197306068171
4	1039	1	2	0	106308070029	510722197404034070	1	39	2	2	2	1	2	1	2	2	1	1	173	60	77	20.0474	76	120	14	2.58	\N	\N	4.79	\N	\N	0.07	2.58	0.638	0.86	4.79	\N	\N	\N	\N	\N	\N	\N	\N	\N	\N	1974-04-03 00:00:00	林旭生	510722197404034070
4	1046	1	2	0	106308080047	51070219710511311X	1	42	2	2	2	1	2	1	2	\N	1	1	172	73	90	24.6755	84	120	44	5.69	\N	\N	6.24	\N	\N	0	5.69	0.361	0.76	6.24	\N	\N	\N	\N	\N	\N	\N	\N	\N	\N	1971-05-11 00:00:00	刘勇	51070219710511311X
4	1047	1	2	0	106310290070	510702197609122829	2	37	2	2	2	1	3	1	1	\N	1	1	152	62	74	26.8352	74	108	36	21.74	\N	\N	4.08	\N	\N	0	21.74	0.343	1.53	4.08	\N	\N	\N	\N	\N	\N	\N	\N	\N	\N	1976-09-12 00:00:00	陈达芬	510702197609122829
4	1050	1	2	0	106308070101	510703199903042411	1	14	1	1	1	1	2	1	1	\N	1	1	165	50	69	18.3655	\N	\N	16	16.98	\N	\N	0.07	\N	\N	0	16.98	0.376	1.78	0.07	\N	\N	\N	\N	\N	\N	\N	\N	\N	\N	1999-03-04 00:00:00	杨清晨	510703199903042411
4	1053	1	2	0	106308090008	510702196501073119	1	48	2	3	2	1	1	1	2	2	1	1	165	50	65	18.3655	76	110	14	10.38	\N	\N	4.02	\N	\N	0	10.38	0.355	1.6	4.02	\N	\N	\N	\N	\N	\N	\N	\N	\N	\N	1965-01-07 00:00:00	陈泽武	510702196501073119
4	1062	1	2	0	106309120163	510703199805032412	1	15	1	1	1	1	2	3	1	\N	1	1	165	47	58	17.2635	\N	\N	37	3.11	\N	\N	0.18	\N	\N	0.38	3.11	0.645	1.4	0.18	\N	\N	\N	\N	\N	\N	\N	\N	\N	\N	1998-05-03 00:00:00	雷刚强	510703199805032412
4	1064	1	2	0	106309120564	510403199808010714	1	15	1	1	1	1	3	3	1	\N	1	1	165	48	59	17.6309	98	128	16	1.12	\N	\N	0.1	\N	\N	0.05	1.12	0.538	1.53	0.1	\N	\N	\N	\N	\N	\N	\N	\N	\N	\N	1998-08-01 00:00:00	肖远鹏	510403199808010714
4	1065	1	2	0	106309180001	510724199709291256	1	15	1	1	1	1	2	3	1	\N	1	1	180	55	65	16.9753	\N	\N	38	1.67	\N	\N	0.08	\N	\N	0.03	1.67	0.324	1.76	0.08	\N	\N	\N	\N	\N	\N	\N	\N	\N	\N	1997-09-29 00:00:00	岳州	510724199709291256
4	1067	1	2	0	106309120165	51070319970318241X	1	16	1	1	1	1	2	3	1	\N	1	1	170	57	63	19.7232	60	118	31	0.2	\N	\N	0.15	\N	\N	0	0.2	0.31	1.95	0.15	\N	\N	\N	\N	\N	\N	\N	\N	\N	\N	1997-03-18 00:00:00	谢潼	51070319970318241X
4	1068	1	2	0	106309120188	510781199806150831	1	15	1	1	1	1	2	3	1	\N	1	1	175	48	56	15.6735	\N	\N	8	1.05	\N	\N	0.15	\N	\N	0	1.05	0.336	2.03	0.15	\N	\N	\N	\N	\N	\N	\N	\N	\N	\N	1998-06-15 00:00:00	代宗奇	510781199806150831
4	1084	1	2	0	106310270170	510703199806012421	2	15	1	1	1	1	2	3	1	\N	1	1	158	45	60	18.026	80	120	12	0.74	\N	\N	0.26	\N	\N	0	0.74	0.303	1.88	0.26	\N	\N	\N	\N	\N	\N	\N	\N	\N	\N	1998-06-01 00:00:00	魏淼	510703199806012421
4	1085	1	2	0	106310270169	410327197612051461	2	36	2	2	2	1	3	3	1	\N	1	1	160	51	63	19.9219	74	103	19	0.22	\N	\N	0.23	\N	\N	0	0.22	0.3	1.73	0.23	\N	\N	\N	\N	\N	\N	\N	\N	\N	\N	1976-12-05 00:00:00	金明芳	410327197612051461
4	1087	1	1	0	106307300006	510724196109020416	1	51	3	3	3	1	1	3	2	4	1	1	164	75	92	27.8852	90	140	52	0.57	\N	\N	0.1	\N	\N	0	0.57	4.945	1.63	0.1	\N	\N	\N	\N	\N	\N	\N	\N	\N	\N	1961-09-02 00:00:00	谢永明	510724196109020416
4	1099	1	1	0	106308050030	510703199510282422	2	17	1	1	1	1	2	3	1	\N	1	1	167	52	71	18.6453	64	100	13	11.31	\N	\N	0.11	\N	\N	0	11.31	0.34	1.92	0.11	\N	\N	\N	\N	\N	\N	\N	\N	\N	\N	1995-10-28 00:00:00	刘婷芝	510703199510282422
4	1100	1	2	0	106311030096	510702196601013113	1	47	2	3	2	1	3	3	1	4	1	1	165	66	78	24.2424	84	121	37	5.46	\N	\N	8.43	\N	\N	0	5.46	0.354	0.84	8.43	\N	\N	\N	\N	\N	\N	\N	\N	\N	\N	1966-01-01 00:00:00	谭家军	510702196601013113
4	1106	1	2	0	106308090050	513722198706033388	2	26	1	1	1	1	2	3	1	\N	1	1	164	54	72	20.0773	68	106	20	0.21	\N	\N	0.13	\N	\N	0	0.21	0.32	2	0.13	\N	\N	\N	\N	\N	\N	\N	\N	\N	\N	1987-06-03 00:00:00	张晓艳	513722198706033388
4	1109	1	2	0	106310290152	510781199001150703	2	23	1	1	1	1	2	3	1	\N	1	1	165	58	78	21.3039	64	98	11	0	\N	\N	0.1	\N	\N	0	0	0.332	1.74	0.1	\N	\N	\N	\N	\N	\N	\N	\N	\N	\N	1990-01-15 00:00:00	赵琴	510781199001150703
4	1113	1	1	0	106311120017	510726198201011629	2	31	2	2	2	2	1	3	1	\N	1	1	162	64.5	83	24.577	80	120	22	0.05	\N	\N	0.12	\N	\N	0	0.05	0.327	1.68	0.12	\N	\N	\N	\N	\N	\N	\N	\N	\N	\N	1982-01-01 00:00:00	余凤霞	510726198201011629
4	1117	1	2	0	106310300198	510703198209162451	1	31	2	2	2	1	3	3	2	\N	3	1	180	98	94	30.2469	82	126	100	4.54	\N	\N	0.1	\N	\N	0	4.54	0.305	1.73	0.1	\N	\N	\N	\N	\N	\N	\N	\N	\N	\N	1982-09-16 00:00:00	张金伟	510703198209162451
4	1120	1	2	0	106310260100	510702196611163115	1	46	2	3	2	1	1	3	2	4	1	1	157	58	70	23.5304	76	118	37	1.33	\N	\N	2.55	\N	\N	0	1.33	0.287	1.47	2.55	\N	\N	\N	\N	\N	\N	\N	\N	\N	\N	1966-11-16 00:00:00	刘东	510702196611163115
4	1125	1	2	0	106308060026	510702197505072812	1	38	2	2	2	1	3	3	1	\N	1	1	170	55	73	19.0311	58	102	22	9.58	\N	\N	9.05	\N	\N	0	9.58	0.294	0.82	9.05	\N	\N	\N	\N	\N	\N	\N	\N	\N	\N	1975-05-07 00:00:00	胡益春	510702197505072812
4	1130	1	2	0	106308060016	510702197210143118	1	40	2	2	2	1	2	3	2	2	1	1	175	82	95	26.7755	88	106	48	1.39	\N	\N	8.85	\N	\N	0.76	1.39	2.07	1.36	8.85	\N	\N	\N	\N	\N	\N	\N	\N	\N	\N	1972-10-14 00:00:00	刘奇	510702197210143118
4	1131	1	2	0	106309020068	510702196608173128	2	47	2	3	2	1	3	3	1	2	1	1	158	55	73	22.0317	68	128	15	1.38	\N	\N	0.13	\N	\N	0	1.38	0.324	1.76	0.13	\N	\N	\N	\N	\N	\N	\N	\N	\N	\N	1966-08-17 00:00:00	李秀英	510702196608173128
4	1133	1	2	0	106308300032	510702197210103132	1	40	2	2	2	1	2	3	3	\N	1	1	172	58	74	19.6052	78	106	42	4.1	\N	\N	7.36	\N	\N	0	4.1	0.309	1.2	7.36	\N	\N	\N	\N	\N	\N	\N	\N	\N	\N	1972-10-10 00:00:00	徐军	510702197210103132
4	1143	1	1	0	106310270146	510703198110192466	2	32	2	2	2	1	2	3	1	\N	1	1	152	54	74	23.3726	72	106	23	0	\N	\N	1.77	\N	\N	0	0	5.94	0.355	1.77	\N	\N	\N	\N	\N	\N	\N	\N	\N	\N	1981-10-19 00:00:00	朱燕茹	510703198110192466
4	1147	1	2	0	106308290012	510702196008013120	2	53	3	3	3	1	1	3	1	\N	1	1	145	52	86	24.7325	68	112	16	10.22	\N	\N	0.63	\N	\N	0	10.22	0.343	1.51	0.63	\N	\N	\N	\N	\N	\N	\N	\N	\N	\N	1960-08-01 00:00:00	李维华	510702196008013120
4	1149	1	2	0	106308290063	510702196705173111	1	46	2	3	2	1	1	3	2	4	1	1	160	53	76	20.7031	94	138	12	0	\N	\N	0.12	\N	\N	0.01	0	0.335	1.68	0.12	\N	\N	\N	\N	\N	\N	\N	\N	\N	\N	1967-05-17 00:00:00	李孝平	510702196705173111
4	1150	1	2	0	106311050054	510702196912293116	1	43	2	2	2	1	1	3	1	\N	1	1	172	67	82	22.6474	64	122	24	5.75	\N	\N	1.69	\N	\N	0	5.75	0.352	1.71	1.69	\N	\N	\N	\N	\N	\N	\N	\N	\N	\N	1969-12-29 00:00:00	何大红	510702196912293116
4	1151	1	1	0	106310290205	510703198406302417	1	29	1	1	1	1	3	3	2	\N	1	1	157	68	80	27.5873	88	136	60	27.38	\N	\N	6.02	\N	\N	0.02	27.38	0.321	1.06	6.02	\N	\N	\N	\N	\N	\N	\N	\N	\N	\N	1984-06-30 00:00:00	郑丹	510703198406302417
4	1152	1	1	0	106310290206	51062319890504642X	2	24	1	1	1	1	2	3	1	\N	1	1	155	52	83	21.6441	80	116	25	0	\N	\N	0.27	\N	\N	0	0	0.344	1.79	0.27	\N	\N	\N	\N	\N	\N	\N	\N	\N	\N	1989-05-04 00:00:00	陈丽	51062319890504642X
4	1155	1	2	0	106310300183	510824198604165879	1	27	1	1	1	1	2	3	2	2	1	1	160	45	60	17.5781	70	122	38	0.07	\N	\N	0.11	\N	\N	0	0.07	0.311	1.85	0.11	\N	\N	\N	\N	\N	\N	\N	\N	\N	\N	1986-04-16 00:00:00	曾建军	510824198604165879
4	1159	1	1	0	106310300197	510822198602123947	2	27	1	1	1	1	3	3	1	\N	1	1	163	59	70	22.2063	76	114	9	0.25	\N	\N	0.11	\N	\N	0	0.25	0.329	1.86	0.11	\N	\N	\N	\N	\N	\N	\N	\N	\N	\N	1986-02-12 00:00:00	郑国兰	510822198602123947
4	1161	1	1	0	106310280053	51072319871221383X	1	25	1	1	1	1	3	3	2	2	1	1	170	73	86	25.2595	74	114	130	4.11	\N	\N	7.041	\N	\N	0	4.11	0.305	1.3	7.041	\N	\N	\N	\N	\N	\N	\N	\N	\N	\N	1987-12-21 00:00:00	张甫	51072319871221383X
4	1164	1	2	0	106308060011	510921197304198806	2	40	2	2	2	1	1	3	1	\N	1	1	160	67	88	26.1719	102	178	33	4.98	\N	\N	7.44	\N	\N	0	4.98	0.302	1.44	7.44	\N	\N	\N	\N	\N	\N	\N	\N	\N	\N	1973-04-19 00:00:00	李琼	510921197304198806
4	1165	1	2	0	106308060010	510702196807083010	1	45	2	3	2	1	2	3	2	4	1	1	160	74	93	28.9062	82	114	39	14.99	\N	\N	7.25	\N	\N	0	14.99	0.309	1.11	7.25	\N	\N	\N	\N	\N	\N	\N	\N	\N	\N	1968-07-08 00:00:00	袁明全	510702196807083010
4	1172	1	2	0	106311070051	510702197003293113	1	43	2	2	2	1	1	3	2	4	1	1	173	66	80	22.0522	80	144	25	1.8	\N	\N	11.04	\N	\N	1.97	1.8	0.317	0.01	11.04	\N	\N	\N	\N	\N	\N	\N	\N	\N	\N	1970-03-29 00:00:00	余明清	510702197003293113
4	1179	1	2	0	106310280129	51070219660618312X	2	47	2	3	2	1	3	3	1	\N	1	1	160	74	86.6	28.9062	80	128	31	0.03	\N	\N	0.14	\N	\N	0	0.03	0.297	1.87	0.14	\N	\N	\N	\N	\N	\N	\N	\N	\N	\N	1966-06-18 00:00:00	刘玉华	51070219660618312X
4	1182	1	2	0	106309060026	510721196805260705	2	45	2	3	2	1	3	3	1	\N	1	1	152	56	72	24.2382	76	120	23	0.17	\N	\N	0.13	\N	\N	0	0.17	0.3	1.84	0.13	\N	\N	\N	\N	\N	\N	\N	\N	\N	\N	1968-05-26 00:00:00	朱生兰	510721196805260705
4	1189	1	2	0	106309030027	510702197003073129	2	43	2	2	2	1	1	3	1	\N	1	1	160	65	81	25.3906	80	124	103	>1000	\N	\N	3.5	\N	\N	0	>1000	0.337	1.31	3.5	\N	\N	\N	\N	\N	\N	\N	\N	\N	\N	1970-03-07 00:00:00	谭素蓉	510702197003073129
4	1190	1	2	0	106309090050	510702197202163127	2	41	2	2	2	1	3	3	1	\N	1	1	155	63	84	26.2227	80	128	19	5.1	\N	\N	6.03	\N	\N	0	5.1	0.338	0.28	6.03	\N	\N	\N	\N	\N	\N	\N	\N	\N	\N	1972-02-16 00:00:00	未莉蓉	510702197202163127
4	1191	1	1	0	106310310022	510702197103033124	2	42	2	2	2	1	3	3	1	\N	1	1	153	58	75	24.7768	82	132	19	0.05	\N	\N	9.51	\N	\N	0.02	0.05	0.325	1.15	9.51	\N	\N	\N	\N	\N	\N	\N	\N	\N	\N	1971-03-03 00:00:00	刘翠蓉	510702197103033124
4	1198	1	2	0	106311020020	51070319950118242X	2	18	1	1	1	1	1	3	1	\N	1	1	162	78	90	29.7211	58	80	21	0.16	\N	\N	0.13	\N	\N	0	0.16	0.316	1.9	0.13	\N	\N	\N	\N	\N	\N	\N	\N	\N	\N	1995-01-18 00:00:00	拓欢欢	51070319950118242X
4	1209	1	2	0	106310270211	510824197606145391	1	37	2	2	2	1	3	3	2	4	1	1	167	81	88	29.0437	74	120	23	5.9	\N	\N	3.47	\N	\N	0.25	5.9	1.627	0.7	3.47	\N	\N	\N	\N	\N	\N	\N	\N	\N	\N	1976-06-14 00:00:00	赵智谋	510824197606145391
4	1211	1	2	0	106310240040	510703198109252425	2	32	2	2	2	1	2	3	1	\N	1	1	168	55	66	19.487	80	132	32	0.3	\N	\N	0.08	\N	\N	0	0.3	0.323	1.9	0.08	\N	\N	\N	\N	\N	\N	\N	\N	\N	\N	1981-09-25 00:00:00	黄艳	510703198109252425
4	1214	1	2	0	106310300149	510921197503246604	2	38	2	2	2	1	3	3	1	\N	1	1	153	50	65	21.3593	76	112	32	7.6	\N	\N	5.68	\N	\N	0	7.6	0.329	0.89	5.68	\N	\N	\N	\N	\N	\N	\N	\N	\N	\N	1975-03-24 00:00:00	李金容	510921197503246604
4	1215	1	2	0	106310310058	510722198208132508	2	31	2	2	2	1	2	3	1	\N	1	1	145	48	68	22.83	60	112	14	0.25	\N	\N	0.2	\N	\N	0	0.25	0.344	1.63	0.2	\N	\N	\N	\N	\N	\N	\N	\N	\N	\N	1982-08-13 00:00:00	林春花	510722198208132508
4	1216	1	2	0	106310210027	510703199604292429	2	17	1	1	1	1	2	3	1	\N	1	1	165	61	70	22.4059	70	130	14	5.36	\N	\N	0.27	\N	\N	0	5.36	0.305	1.85	0.27	\N	\N	\N	\N	\N	\N	\N	\N	\N	\N	1996-04-29 00:00:00	雷晓翠	510703199604292429
4	1220	1	2	0	106310300120	510703198611122415	1	26	1	1	1	1	2	3	2	2	1	1	176	78	78	25.1808	68	114	31	0	\N	\N	0.09	\N	\N	0	0	0.322	1.93	0.09	\N	\N	\N	\N	\N	\N	\N	\N	\N	\N	1986-11-12 00:00:00	李能	510703198611122415
4	1224	1	2	0	106308080033	510703198807262428	2	25	1	1	1	1	3	3	1	\N	1	1	167	48	63	17.2111	78	122	8	4.87	\N	\N	0.19	\N	\N	0.27	4.87	1.346	0.66	0.19	\N	\N	\N	\N	\N	\N	\N	\N	\N	\N	1988-07-26 00:00:00	刘丹丹	510703198807262428
4	1234	1	2	0	106309170144	510703199902033927	2	14	1	1	1	1	2	1	1	\N	1	1	145	41	70	19.5006	\N	\N	9	5.32	\N	\N	0.16	\N	\N	0	5.32	0.33	2.01	0.16	\N	\N	\N	\N	\N	\N	\N	\N	\N	\N	1999-02-03 00:00:00	刘洋	510703199902033927
4	1237	1	2	0	106310210022	510702197509303120	2	38	2	2	2	1	1	3	1	\N	1	1	165	65	82	23.8751	86	130	32	0.84	\N	\N	8.59	\N	\N	0	0.84	0.379	0.32	8.59	\N	\N	\N	\N	\N	\N	\N	\N	\N	\N	1975-09-30 00:00:00	钟霞	510702197509303120
4	1245	1	2	0	106310230063	510724198511096127	2	27	1	1	1	1	3	3	1	\N	1	1	150	55	75	24.4444	72	120	13	0.15	\N	\N	0.03	\N	\N	0	0.15	0.301	0.7	0.03	\N	\N	\N	\N	\N	\N	\N	\N	\N	\N	1985-11-09 00:00:00	柏东梅	510724198511096127
4	1247	1	2	0	106310170083	510321198406086911	1	29	1	1	1	1	3	3	1	\N	1	1	175	61	69	19.9184	76	118	8	0	\N	\N	0.09	\N	\N	0	0	0.316	1.74	0.09	\N	\N	\N	\N	\N	\N	\N	\N	\N	\N	1984-06-08 00:00:00	吴小平	510321198406086911
4	1252	1	2	0	106310210114	510781197608140844	2	37	2	2	2	1	1	3	1	\N	1	1	162	41	65	15.6226	84	118	12	0	\N	\N	0.16	\N	\N	0	0	0.302	1.69	0.16	\N	\N	\N	\N	\N	\N	\N	\N	\N	\N	1976-08-14 00:00:00	苏蓉	510781197608140844
4	1253	1	2	0	106310290170	510704197802232723	2	35	2	2	2	1	3	3	1	\N	1	1	150	67	80	29.7778	64	120	28	0	\N	\N	0.15	\N	\N	0	0	0.344	1.84	0.15	\N	\N	\N	\N	\N	\N	\N	\N	\N	\N	1978-02-23 00:00:00	高艳	510704197802232723
4	1254	1	2	0	106310140148	612326198501065024	2	28	1	1	1	1	1	3	1	\N	1	1	155	55	73	22.8928	74	116	10	0	\N	\N	0.07	\N	\N	0	0	0.329	1.88	0.07	\N	\N	\N	\N	\N	\N	\N	\N	\N	\N	1985-01-06 00:00:00	唐守艳	612326198501065024
4	1256	1	1	0	106310210123	510781199101060705	2	22	1	1	1	1	3	3	1	\N	1	1	157	42	54	17.0392	80	110	13	0.52	\N	\N	0.08	\N	\N	0	0.52	0.373	1.91	0.08	\N	\N	\N	\N	\N	\N	\N	\N	\N	\N	1991-01-06 00:00:00	赵丹	510781199101060705
4	1265	1	2	0	106310300104	510703198702162420	2	26	1	1	1	1	3	3	1	\N	1	1	163	58	77	21.83	70	118	23	3.33	\N	\N	8.09	\N	\N	0	3.33	0.365	0.09	8.09	\N	\N	\N	\N	\N	\N	\N	\N	\N	\N	1987-02-16 00:00:00	魏春艳	510703198702162420
4	1270	1	2	0	106310180109	510723198409092086	2	29	1	1	1	1	2	3	1	\N	1	1	160	50	78	19.5312	70	106	10	0	\N	\N	0.26	\N	\N	0	0	0.326	1.79	0.26	\N	\N	\N	\N	\N	\N	\N	\N	\N	\N	1984-09-09 00:00:00	廖容	510723198409092086
4	1271	1	2	0	106310200154	510703199501212414	1	18	1	1	1	1	2	3	2	2	1	1	170	49	59	16.955	62	106	22	14.59	\N	\N	0.1	\N	\N	0	14.59	0.351	1.84	0.1	\N	\N	\N	\N	\N	\N	\N	\N	\N	\N	1995-01-21 00:00:00	李林	510703199501212414
4	1275	1	2	0	106310290157	510703198901092437	1	24	1	1	1	1	3	3	2	2	1	1	162	73	87	27.8159	82	134	86	1.85	\N	\N	7.95	\N	\N	0	1.85	0.328	1.23	7.95	\N	\N	\N	\N	\N	\N	\N	\N	\N	\N	1989-01-09 00:00:00	曾小军	510703198901092437
4	1276	1	2	0	106310190009	510703199008152470	1	23	1	1	1	1	3	3	2	4	1	1	168	65	76	23.03	102	174	43	0	\N	\N	0.17	\N	\N	0	0	0.3	1.96	0.17	\N	\N	\N	\N	\N	\N	\N	\N	\N	\N	1990-08-15 00:00:00	曾宁	510703199008152470
4	1277	1	2	0	106310190018	510726198308271025	2	30	2	2	2	2	1	3	1	\N	1	1	155	55	77	22.8928	66	114	18	0.09	\N	\N	0.21	\N	\N	0	0.09	0.302	1.65	0.21	\N	\N	\N	\N	\N	\N	\N	\N	\N	\N	1983-08-27 00:00:00	张蓉	510726198308271025
4	1279	1	2	0	106311050072	510902198512288705	2	27	1	1	1	1	3	3	1	\N	1	1	1560	62	79	0.254767	70	110	21	0	\N	\N	0.13	\N	\N	0	0	0.276	1.9	0.13	\N	\N	\N	\N	\N	\N	\N	\N	\N	\N	1985-12-28 00:00:00	刘春华	510902198512288705
4	1310	1	1	0	106310300076	510703199008152454	1	23	1	1	1	1	3	3	2	2	1	1	173	53	61	17.7086	76	122	23	0.15	\N	\N	0.1	\N	\N	0	0.15	0.336	1.81	0.1	\N	\N	\N	\N	\N	\N	\N	\N	\N	\N	1990-08-15 00:00:00	谢姚	510703199008152454
4	1312	1	1	0	106308230012	510703199710242417	1	15	1	1	1	1	2	3	1	\N	1	1	164	46	67	17.1029	66	120	17	2.27	\N	\N	0.12	\N	\N	0.11	2.27	0.495	1.65	0.12	\N	\N	\N	\N	\N	\N	\N	\N	\N	\N	1997-10-24 00:00:00	李沐阳	510703199710242417
4	1315	1	2	0	106310270221	510703199604302447	2	17	1	1	1	1	2	3	1	\N	1	1	163	48	67	18.0662	69	109	11	15.07	\N	\N	0.15	\N	\N	0	15.07	0.367	1.69	0.15	\N	\N	\N	\N	\N	\N	\N	\N	\N	\N	1996-04-30 00:00:00	刘璐琳	510703199604302447
4	1317	1	1	0	106310260257	510703199201102416	1	21	1	1	1	1	2	3	2	2	1	1	160	64	80	25	82	130	31	0.1	\N	\N	0.14	\N	\N	0	0.1	0.32	1.96	0.14	\N	\N	\N	\N	\N	\N	\N	\N	\N	\N	1992-01-10 00:00:00	魏翔	510703199201102416
4	1320	1	2	0	106310300070	510703199212282432	1	20	1	1	1	1	2	1	2	\N	1	1	167	45	62	16.1354	84	118	28	2.5	\N	\N	0.55	\N	\N	0.08	2.5	3.559	0.43	0.55	\N	\N	\N	\N	\N	\N	\N	\N	\N	\N	1992-12-28 00:00:00	代明城	510703199212282432
4	1322	1	2	0	106310300033	510703199606172412	1	17	1	1	1	1	2	1	2	2	1	1	176	62	68	20.0155	70	136	10	5.97	\N	\N	0.14	\N	\N	0	5.97	0.341	1.91	0.14	\N	\N	\N	\N	\N	\N	\N	\N	\N	\N	1996-06-17 00:00:00	胡锐峰	510703199606172412
4	1325	1	2	0	106310280253	510781198905070349	2	24	1	1	1	1	2	1	1	\N	1	1	163	76	85	28.6048	73	110	46	0.07	\N	\N	0.19	\N	\N	0	0.07	0.352	1.98	0.19	\N	\N	\N	\N	\N	\N	\N	\N	\N	\N	1989-05-07 00:00:00	唐丽丽	510781198905070349
4	1326	1	2	0	106308300062	51070319920206241X	1	21	1	1	1	1	2	1	2	5	1	1	176	59	68	19.047	70	120	30	0	\N	\N	0.15	\N	\N	0	0	0.309	2.05	0.15	\N	\N	\N	\N	\N	\N	\N	\N	\N	\N	1992-02-06 00:00:00	王强	51070319920206241X
4	1332	1	1	0	106308070108	510703199601092413	1	17	1	1	1	1	2	3	2	2	1	1	173	53	69	17.7086	66	116	6	3.81	\N	\N	0.21	\N	\N	0	3.81	0.322	2.01	0.21	\N	\N	\N	\N	\N	\N	\N	\N	\N	\N	1996-01-09 00:00:00	杨清虹	510703199601092413
4	1337	1	2	0	106310240068	510703199306302422	2	20	1	1	1	1	2	1	1	\N	1	1	160	41	55	16.0156	64	100	26	10.85	\N	\N	0.24	\N	\N	0	10.85	0.338	1.8	0.24	\N	\N	\N	\N	\N	\N	\N	\N	\N	\N	1993-06-30 00:00:00	张涵茜	510703199306302422
4	1338	1	2	0	106308090013	510781197904177123	2	34	2	2	2	1	3	3	1	\N	1	1	167	55	75	19.721	68	112	21	0.1	\N	\N	0.14	\N	\N	0	0.1	0.636	1.6	0.14	\N	\N	\N	\N	\N	\N	\N	\N	\N	\N	1979-04-17 00:00:00	石丽平	510781197904177123
4	1339	1	1	0	106311170012	510822198102121267	2	32	2	2	2	1	1	3	1	\N	1	1	159	74	83	29.271	56	108	28	0.02	\N	\N	0.21	\N	\N	0	0.02	0.365	1.73	0.21	\N	\N	\N	\N	\N	\N	\N	\N	\N	\N	1981-02-12 00:00:00	冯兴慧	510822198102121267
4	1348	1	1	0	106307310059	510703199803062423	2	15	1	1	1	1	2	1	1	\N	1	1	160	55	67	21.4844	80	118	21	12.39	\N	\N	0.11	\N	\N	0	12.39	0.331	1.97	0.11	\N	\N	\N	\N	\N	\N	\N	\N	\N	\N	1998-03-06 00:00:00	李巧	510703199803062423
4	1355	1	1	0	106310270212	510703199508052441	2	18	1	1	1	1	2	3	1	\N	1	1	105	53	67	48.0726	60	108	11	14.7	\N	\N	0.14	\N	\N	0	14.7	0.31	1.92	0.14	\N	\N	\N	\N	\N	\N	\N	\N	\N	\N	1995-08-05 00:00:00	潘云	510703199508052441
4	18	2	3	0	103310070024	510703199703243112	1	16	1	1	1	1	1	3	1	\N	1	1	175	56.4	70	18.4163	72	124	11	0.34	\N	\N	0.12	\N	\N	0	0.34	0.283	1.78	0.12	\N	\N	\N	\N	\N	\N	\N	\N	\N	\N	1997-03-24 00:00:00	洪俊豪	510703199703243112
4	39	2	3	0	103308060031	513437197106208520	2	42	2	2	2	1	3	3	1	\N	1	1	156	63.8	94	26.2163	67	114	43	18.95	\N	\N	4.1	\N	\N	0	18.95	0.389	1.37	4.1	\N	\N	\N	\N	\N	\N	\N	\N	\N	\N	1971-06-20 00:00:00	胡常敏	513437197106208520
4	44	2	3	0	103310310014	512922197211276340	2	40	2	2	2	1	1	3	1	\N	1	1	172	71.4	86	24.1347	74	123	15	83.77	\N	\N	2.76	\N	\N	0	83.77	0.317	1.63	2.76	\N	\N	\N	\N	\N	\N	\N	\N	\N	\N	1972-11-27 00:00:00	仁治英	512922197211276340
4	56	2	3	0	103308100024	510702195508285523	2	57	3	3	3	1	1	3	1	\N	2	1	155	57.1	81	23.7669	104	146	181	43.4	\N	\N	0.005	\N	\N	-2	43.4	\N	\N	0.005	\N	\N	\N	\N	\N	\N	\N	\N	\N	\N	1955-08-28 00:00:00	周玉琼	510702195508285523
4	85	2	3	0	103309040006	510702196711095412	1	45	2	3	2	1	1	3	2	4	1	1	166	69.1	84	25.0762	79	115	35	2.4	\N	\N	0.005	\N	\N	0.03	2.4	\N	\N	0.005	\N	\N	\N	\N	\N	\N	\N	\N	\N	\N	1967-11-09 00:00:00	吴代明	510702196711095412
4	122	2	3	0	103308230036	510702197301065426	2	40	2	2	2	1	1	3	1	\N	1	1	155	55	76	22.8928	59	99	15	139	\N	\N	1.91	\N	\N	0.01	139	\N	\N	1.91	\N	\N	\N	\N	\N	\N	\N	\N	\N	\N	1973-01-06 00:00:00	詹凤琼	510702197301065426
4	125	2	3	0	103309060001	510702196004025028	2	53	3	3	3	1	1	3	1	\N	1	1	145	52.4	83	24.9227	81	142	36	28.2	\N	\N	1.87	\N	\N	0.02	28.2	\N	\N	1.87	\N	\N	\N	\N	\N	\N	\N	\N	\N	\N	1960-04-02 00:00:00	钟秀英	510702196004025028
4	136	2	3	0	103309040062	513437196210298525	2	50	3	3	3	1	1	3	1	\N	2	1	160	97.7	116	38.1641	114	180	27	2.78	\N	\N	3.72	\N	\N	0.05	2.78	1.049	0.68	3.72	\N	\N	\N	\N	\N	\N	\N	\N	\N	\N	1962-10-29 00:00:00	唐先秀	513437196210298525
4	156	2	3	0	103309110078	510602196406265125	2	49	2	3	2	1	1	3	1	\N	1	1	160	64.1	80	25.0391	68	105	21	71.86	\N	\N	2.4	\N	\N	0	71.86	0.325	0.42	2.4	\N	\N	\N	\N	\N	\N	\N	\N	\N	\N	1964-06-26 00:00:00	王用琼	510602196406265125
4	169	2	3	0	103309250013	512922197402194540	2	39	2	2	2	1	1	3	1	\N	1	1	160	50	70	19.5312	89	137	19	16.45	\N	\N	8.46	\N	\N	0	16.45	0.39	1.41	8.46	\N	\N	\N	\N	\N	\N	\N	\N	\N	\N	1974-02-19 00:00:00	张群兰	512922197402194540
4	197	2	3	0	103312230018	510702196312195432	1	50	3	3	3	1	1	3	2	4	1	1	166	66.1	78	23.9875	99	186	22	16.89	\N	\N	11.51	\N	\N	0	16.89	0.332	0.01	11.51	\N	\N	\N	\N	\N	\N	\N	\N	\N	\N	1963-12-19 00:00:00	谢家国	510702196312195432
4	227	2	3	0	103311150021	510702196804105421	2	45	2	3	2	1	1	3	1	\N	1	1	156	59.7	80	24.5316	77	138	17	341.21	\N	\N	3.67	\N	\N	0	341.21	0.281	1.42	3.67	\N	\N	\N	\N	\N	\N	\N	\N	\N	\N	1968-04-10 00:00:00	向英	510702196804105421
4	228	2	3	0	103309230031	510702197206185526	2	41	2	2	2	1	1	3	1	\N	1	1	145	67	92	31.8668	78	120	19	1.76	\N	\N	0.91	\N	\N	0	1.76	0.306	1.56	0.91	\N	\N	\N	\N	\N	\N	\N	\N	\N	\N	1972-06-18 00:00:00	唐胜芳	510702197206185526
4	231	2	3	0	103310040024	51070319941202311X	1	18	1	1	1	1	2	3	1	\N	1	1	172	56.2	65	18.9968	81	121	13	137.84	\N	\N	0.1	\N	\N	0	137.84	0.294	1.75	0.1	\N	\N	\N	\N	\N	\N	\N	\N	\N	\N	1994-12-02 00:00:00	周祖辉	51070319941202311X
4	235	2	3	0	103309160107	510702196312185429	2	49	2	3	2	1	1	3	1	\N	1	1	150	47.8	72	21.2444	65	109	38	17.43	\N	\N	1.6	\N	\N	0	17.43	0.291	1.32	1.6	\N	\N	\N	\N	\N	\N	\N	\N	\N	\N	1963-12-18 00:00:00	高进兰	510702196312185429
4	236	2	3	0	103309110048	510702195811025417	1	54	3	3	3	1	1	3	2	2	1	1	150	49.1	77	21.8222	60	115	23	2.58	\N	\N	2.4	\N	\N	0	2.58	0.304	0.19	2.4	\N	\N	\N	\N	\N	\N	\N	\N	\N	\N	1958-11-02 00:00:00	杨天模	510702195811025417
4	237	2	3	0	103309020045	510623196710196832	1	45	2	3	2	1	1	3	2	4	1	1	156	60.3	85	24.7781	96	138	53	22.39	\N	\N	6.31	\N	\N	0	22.39	0.298	0.32	6.31	\N	\N	\N	\N	\N	\N	\N	\N	\N	\N	1967-10-19 00:00:00	周祖进	510623196710196832
4	239	2	3	0	103309060046	510702196701085421	2	46	2	3	2	1	1	3	1	\N	1	1	155	59.6	78	24.8075	65	108	43	17.4	\N	\N	0.91	\N	\N	0	17.4	1.422	0.86	0.91	\N	\N	\N	\N	\N	\N	\N	\N	\N	\N	1967-01-08 00:00:00	黄秀英	510702196701085421
4	246	2	3	0	103309060058	510702196801076426	2	45	2	3	2	1	1	3	1	\N	1	1	154	48.4	72	20.4082	79	132	28	54.29	\N	\N	2.87	\N	\N	0	54.29	0.784	1.13	2.87	\N	\N	\N	\N	\N	\N	\N	\N	\N	\N	1968-01-07 00:00:00	谢琼	510702196801076426
4	253	2	3	0	103310260050	510703199608053126	2	17	1	1	1	1	1	3	1	\N	1	1	160	53.5	68	20.8984	67	122	10	2.79	\N	\N	0.16	\N	\N	0	2.79	0.338	1.5	0.16	\N	\N	\N	\N	\N	\N	\N	\N	\N	\N	1996-08-05 00:00:00	罗容	510703199608053126
4	254	2	3	0	103311160016	510702195603095525	2	57	3	3	3	1	1	3	1	\N	2	1	148	67.2	89	30.6793	99	171	20	123.63	\N	\N	3.47	\N	\N	0	123.63	0.258	0.74	3.47	\N	\N	\N	\N	\N	\N	\N	\N	\N	\N	1956-03-09 00:00:00	刘术琼	510702195603095525
4	257	2	3	0	103312200009	51070319850802311X	1	28	1	1	1	1	1	3	2	2	1	1	170	73	80	25.2595	65	157	23	106	\N	\N	0.24	\N	\N	0	106	0.269	0.97	0.24	\N	\N	\N	\N	\N	\N	\N	\N	\N	\N	1985-08-02 00:00:00	胡心勇	51070319850802311X
4	270	2	3	0	103309060060	510702196508075416	1	48	2	3	2	1	1	3	2	2	2	1	162	50.4	77	19.2044	61	98	157	143.11	\N	\N	1.89	\N	\N	0	143.11	0.294	1.51	1.89	\N	\N	\N	\N	\N	\N	\N	\N	\N	\N	1965-08-07 00:00:00	李科华	510702196508075416
4	295	2	3	0	103309120040	510702197406265416	1	39	2	2	2	1	1	3	2	3	1	1	168	68	83	24.093	89	122	54	1.16	\N	\N	2.63	\N	\N	0	1.16	0.303	1.07	2.63	\N	\N	\N	\N	\N	\N	\N	\N	\N	\N	1974-06-26 00:00:00	谢志高	510702197406265416
4	298	2	3	0	103312230006	510702197702155414	1	36	2	2	2	1	1	3	1	\N	1	1	165	63.1	75	23.1772	72	122	81	7.25	\N	\N	3.67	\N	\N	0.13	7.25	1.608	0.07	3.67	\N	\N	\N	\N	\N	\N	\N	\N	\N	\N	1977-02-15 00:00:00	张述斌	510702197702155414
4	322	2	3	0	103312200018	510703199301153122	2	20	1	1	1	1	1	3	1	\N	1	1	154	52.2	68	22.0105	58	109	15	16.4	\N	\N	1.86	\N	\N	-2	16.4	\N	\N	1.86	\N	\N	\N	\N	\N	\N	\N	\N	\N	\N	1993-01-15 00:00:00	廖姮	510703199301153122
4	334	2	3	0	103311060039	510702197604135428	2	37	2	2	2	1	1	3	1	\N	1	1	152	54.9	72	23.7621	80	130	15	1.9	\N	\N	8.81	\N	\N	0	1.9	0.304	0.45	8.81	\N	\N	\N	\N	\N	\N	\N	\N	\N	\N	1976-04-13 00:00:00	郭春燕	510702197604135428
4	346	2	3	0	103308050057	51070319980408312X	2	15	1	1	1	1	2	3	1	\N	1	1	156	46	76	18.902	76	121	40	30.46	\N	\N	0.25	\N	\N	0	30.46	0.313	1.73	0.25	\N	\N	\N	\N	\N	\N	\N	\N	\N	\N	1998-04-08 00:00:00	赵金天	51070319980408312X
4	368	2	3	0	103311180012	51060219690320514X	2	44	2	2	2	1	1	3	2	2	1	1	156	59.5	77	24.4494	77	122	55	1.02	\N	\N	0.1	\N	\N	0	1.02	0.3211	1.92	0.1	\N	\N	\N	\N	\N	\N	\N	\N	\N	\N	1969-03-20 00:00:00	郑宗碧	51060219690320514X
4	372	2	3	0	103310040202	510703198103273129	2	32	2	2	2	1	3	3	1	\N	1	1	165	58.8	83	21.5978	67	105	28	81.98	\N	\N	0.09	\N	\N	0	81.98	0.413	8.35	0.09	\N	\N	\N	\N	\N	\N	\N	\N	\N	\N	1981-03-27 00:00:00	赵新	510703198103273129
4	382	2	3	0	103310230016	510703198601173120	2	27	1	1	1	1	1	3	1	\N	1	1	160	74.9	90	29.2578	88	120	15	25.78	\N	\N	8.82	\N	\N	0	25.78	0.319	0.49	8.82	\N	\N	\N	\N	\N	\N	\N	\N	\N	\N	1986-01-17 00:00:00	周晓娟	510703198601173120
4	396	2	3	0	103311030062	510703198912153274	1	23	1	1	1	1	1	3	1	2	1	1	170	52.4	80	18.1315	68	127	40	38.6	\N	\N	7.13	\N	\N	0	38.6	0.328	1.25	7.13	\N	\N	\N	\N	\N	\N	\N	\N	\N	\N	1989-12-15 00:00:00	王圳	510703198912153274
4	399	2	3	0	103309200019	510703199509303126	2	17	1	1	1	1	1	3	1	\N	1	1	160	40.2	60	15.7031	54	97	10	159.82	\N	\N	0.12	\N	\N	0	159.82	0.307	1.92	0.12	\N	\N	\N	\N	\N	\N	\N	\N	\N	\N	1995-09-30 00:00:00	刘璐璐	510703199509303126
4	421	2	3	0	103309090016	510922195405275599	1	59	3	3	3	1	1	3	2	3	1	1	166	59.3	90	21.5198	81	126	25	19.09	\N	\N	0.17	\N	\N	0	19.09	0.338	1.81	0.17	\N	\N	\N	\N	\N	\N	\N	\N	\N	\N	1954-05-27 00:00:00	胥银勋	510922195405275599
4	422	2	3	0	103401160009	510703199103203117	1	22	1	1	1	1	1	3	2	2	1	1	165	67.2	76	24.6832	70	134	27	0	\N	\N	0.08	\N	\N	0	0	0.34	1.94	0.08	\N	\N	\N	\N	\N	\N	\N	\N	\N	\N	1991-03-20 00:00:00	赖任	510703199103203117
4	423	2	3	0	103308060007	51070219631225544X	2	49	2	3	2	1	3	3	1	\N	1	1	157	46	74	18.662	83	116	21	11.63	\N	\N	7.17	\N	\N	0	11.63	0.317	1.36	7.17	\N	\N	\N	\N	\N	\N	\N	\N	\N	\N	1963-12-25 00:00:00	刘会苹	51070219631225544X
4	424	2	3	0	103401220023	510702197203105420	2	41	2	2	2	1	1	3	1	\N	1	1	160	75.4	86	29.4531	78	120	32	5.09	\N	\N	0.11	\N	\N	0.02	5.09	1.553	0.01	0.11	\N	\N	\N	\N	\N	\N	\N	\N	\N	\N	1972-03-10 00:00:00	梁成英	510702197203105420
4	425	2	3	0	103401160002	510702197005285416	1	43	2	2	2	1	1	3	1	2	1	1	160	72.7	96	28.3984	89	109	36	0	\N	\N	0.27	\N	\N	0	0	0.314	1.91	0.27	\N	\N	\N	\N	\N	\N	\N	\N	\N	\N	1970-05-28 00:00:00	赖成江	510702197005285416
4	429	2	3	0	103309250128	510702195901275428	2	54	3	3	3	1	1	3	1	\N	1	1	145	53.4	78	25.3983	61	108	89	47.98	\N	\N	6.79	\N	\N	0	47.98	0.331	1.72	6.79	\N	\N	\N	\N	\N	\N	\N	\N	\N	\N	1959-01-27 00:00:00	刘春梅	510702195901275428
4	435	2	3	0	103308160013	510702195808085427	2	55	3	3	3	1	1	3	1	\N	1	1	155	56.4	89	23.4755	70	123	124	18.2	\N	\N	0.15	\N	\N	0	18.2	0.307	1.807	0.15	\N	\N	\N	\N	\N	\N	\N	\N	\N	\N	1958-08-08 00:00:00	谢忠琼	510702195808085427
4	440	2	3	0	103308300029	510703199307243129	2	20	1	1	1	1	1	3	1	\N	1	3	155	42	59	17.4818	70	121	15	41.05	\N	\N	0.25	\N	\N	0.09	41.05	1.346	无	0.25	\N	\N	\N	\N	\N	\N	\N	\N	\N	\N	1993-07-24 00:00:00	曾会	510703199307243129
4	454	2	3	0	103311100008	510703199109233122	2	22	1	1	1	1	1	3	1	\N	1	1	149	60.5	80	27.251	78	120	21	24.51	\N	\N	7.43	\N	\N	0	24.51	0.346	0.84	7.43	\N	\N	\N	\N	\N	\N	\N	\N	\N	\N	1991-09-23 00:00:00	李莉	510703199109233122
4	456	2	3	0	103311060056	510702195910165415	1	54	3	3	3	1	1	3	1	3	1	1	160	53	76	20.7031	80	136	27	11.4	\N	\N	10.05	\N	\N	1.88	11.4	0.369	0.05	10.05	\N	\N	\N	\N	\N	\N	\N	\N	\N	\N	1959-10-16 00:00:00	赖仁华	510702195910165415
4	457	2	3	0	103311060057	510702196305045428	2	50	3	3	3	1	1	3	1	\N	1	1	148	49.6	74	22.6443	79	120	33	10.05	\N	\N	5.37	\N	\N	1.3	10.05	1.357	0.49	5.37	\N	\N	\N	\N	\N	\N	\N	\N	\N	\N	1963-05-04 00:00:00	叶晓云	510702196305045428
4	458	2	3	0	103307310037	510722197610137548	2	36	2	2	2	1	3	3	1	\N	1	1	162	61.5	76.1	23.4339	66	100	20	42.44	\N	\N	5.16	\N	\N	0.08	42.44	0.618	0.96	5.16	\N	\N	\N	\N	\N	\N	\N	\N	\N	\N	1976-10-13 00:00:00	刘蓉	510722197610137548
4	475	2	3	0	103309110073	510703199211293121	2	20	1	1	1	1	2	3	1	\N	1	1	150	41.6	68	18.4889	69	103	14	0.99	\N	\N	7	\N	\N	0	0.99	0.335	1.79	7	\N	\N	\N	\N	\N	\N	\N	\N	\N	\N	1992-11-29 00:00:00	唐莎莎	510703199211293121
4	477	2	3	0	103311190017	510703198311153113	1	30	2	2	2	1	1	3	2	3	1	1	160	67.4	84	26.3281	81	134	16	3.8	\N	\N	0.1	\N	\N	0	3.8	0.327	3.269	0.1	\N	\N	\N	\N	\N	\N	\N	\N	\N	\N	1983-11-15 00:00:00	郭永东	510703198311153113
4	478	2	3	0	103308270037	510703199305093112	1	20	1	1	1	1	1	3	2	\N	1	1	172	62.1	66	20.9911	78	124	18	26.74	\N	\N	0.38	\N	\N	0	26.74	0.362	1.27	0.38	\N	\N	\N	\N	\N	\N	\N	\N	\N	\N	1993-05-09 00:00:00	赖强	510703199305093112
4	481	2	3	0	103311080069	510703198306273129	2	30	2	2	2	1	1	3	1	2	1	1	163	63.4	72	23.8624	65	130	22	0.25	\N	\N	10.86	\N	\N	146.58	0.25	0.328	0.02	10.86	\N	\N	\N	\N	\N	\N	\N	\N	\N	\N	1983-06-27 00:00:00	郭欢欢	510703198306273129
4	482	2	3	0	103310070042	510702197801196422	2	35	2	2	2	1	1	3	1	\N	1	1	150	58.7	76	26.0889	70	117	9	100.52	\N	\N	8.21	\N	\N	0	100.52	0.328	0.02	8.21	\N	\N	\N	\N	\N	\N	\N	\N	\N	\N	1978-01-19 00:00:00	杨顺英	510702197801196422
4	483	2	3	0	103307310061	510702197503265418	1	38	2	2	2	1	3	3	1	2	1	1	166	57.6	76	20.9029	76	121	40	19.22	\N	\N	1.13	\N	\N	0	19.22	..337	8.69	1.13	\N	\N	\N	\N	\N	\N	\N	\N	\N	\N	1975-03-26 00:00:00	向万福	510702197503265418
4	498	2	3	0	103311060051	510522197506241758	1	38	2	2	2	1	2	3	1	\N	1	1	165	55.9	77	20.5326	82	140	15	122.22	\N	\N	0.12	\N	\N	0	122.22	0.329	1.8	0.12	\N	\N	\N	\N	\N	\N	\N	\N	\N	\N	1975-06-24 00:00:00	李防修	510522197506241758
4	509	2	3	0	103312260010	510702197804095416	1	35	2	2	2	1	1	3	2	3	1	1	174	72	78	23.7812	84	134	21	1.59	\N	\N	0.16	\N	\N	0	1.59	0.336	1.86	0.16	\N	\N	\N	\N	\N	\N	\N	\N	\N	\N	1978-04-09 00:00:00	赵宗厚	510702197804095416
4	514	2	3	0	103311110013	511113198512120319	1	27	1	1	1	1	1	3	2	2	1	1	180	66.6	76	20.5556	69	129	26	0	\N	\N	0.16	\N	\N	0	0	0.311	1.52	0.16	\N	\N	\N	\N	\N	\N	\N	\N	\N	\N	1985-12-12 00:00:00	王川	511113198512120319
4	517	2	3	0	103309050006	510726199101311426	2	22	1	1	1	2	2	3	1	\N	1	1	160	50.2	68	19.6094	73	114	9	>1000	\N	\N	9.42	\N	\N	0	>1000	0.32	0.14	9.42	\N	\N	\N	\N	\N	\N	\N	\N	\N	\N	1991-01-31 00:00:00	张晓玲	510726199101311426
4	529	2	3	0	103401230007	513722198301015675	1	31	2	2	2	1	1	3	1	\N	1	1	165	58.3	70	21.4141	72	118	15	838.3	\N	\N	0.053	\N	\N	-2	838.3	\N	\N	0.053	\N	\N	\N	\N	\N	\N	\N	\N	\N	\N	1983-01-01 00:00:00	李军如	513722198301015675
4	533	2	3	0	103312230017	510703198612083112	1	27	1	1	1	1	1	3	2	3	1	1	175	66	76	21.551	115	138	36	1.31	\N	\N	9.52	\N	\N	0.01	1.31	0.335	0.08	9.52	\N	\N	\N	\N	\N	\N	\N	\N	\N	\N	1986-12-08 00:00:00	张小军	510703198612083112
4	545	2	3	0	103401240013	510703199503063117	1	18	1	1	1	1	1	3	1	\N	1	1	172	64	72	21.6333	66	116	33	4.7	\N	\N	2.05	\N	\N	0.02	4.7	\N	\N	2.05	\N	\N	\N	\N	\N	\N	\N	\N	\N	\N	1995-03-06 00:00:00	杨永林	510703199503063117
4	553	2	3	0	103310200021	510703198310023122	2	30	2	2	2	1	1	3	1	\N	1	1	165	60.9	83	22.3691	69	107	31	20.33	\N	\N	0.14	\N	\N	0	20.33	0.38	1.6	0.14	\N	\N	\N	\N	\N	\N	\N	\N	\N	\N	1983-10-02 00:00:00	赖红梅	510703198310023122
4	556	2	3	0	103401250025	510703199701243119	1	17	1	1	1	1	1	3	1	\N	1	1	160	50.6	68	19.7656	64	110	9	0.83	\N	\N	0.7	\N	\N	0	0.83	3.679	1.55	0.7	\N	\N	\N	\N	\N	\N	\N	\N	\N	\N	1997-01-24 00:00:00	杨浩	510703199701243119
4	574	2	3	0	103308030059	510602198210225112	1	30	2	2	2	1	1	3	2	2	1	1	173	58.3	72	19.4794	68	134	26	18.41	\N	\N	0.77	\N	\N	0.04	18.41	0.335	1.42	0.77	\N	\N	\N	\N	\N	\N	\N	\N	\N	\N	1982-10-22 00:00:00	李念	510602198210225112
4	586	2	3	0	103311110003	510703198608143119	1	27	1	1	1	1	1	3	2	2	1	1	170	82.5	88	28.5467	88	133	35	57.67	\N	\N	0.24	\N	\N	0	57.67	0.34	1.44	0.24	\N	\N	\N	\N	\N	\N	\N	\N	\N	\N	1986-08-14 00:00:00	崔兴龙	510703198608143119
4	597	2	3	0	103308160043	510703199111083135	1	21	1	1	1	1	1	3	1	\N	1	1	170	79	83	27.3356	91	148	32	0.03	\N	\N	0.26	\N	\N	0	0.03	0.352	1.64	0.26	\N	\N	\N	\N	\N	\N	\N	\N	\N	\N	1991-11-08 00:00:00	粟刚	510703199111083135
4	612	2	3	0	103309170131	510703198007083114	1	33	2	2	2	1	1	3	2	\N	1	1	180	57.1	69	17.6235	83	133	11	0.06	\N	\N	0.14	\N	\N	0	0.06	0.319	1.78	0.14	\N	\N	\N	\N	\N	\N	\N	\N	\N	\N	1980-07-08 00:00:00	黄玉常	510703198007083114
4	614	2	3	0	103310270004	510703199406053128	2	19	1	1	1	1	1	3	1	\N	1	1	162	51.6	60.6	19.6616	68	109	8	106.4	\N	\N	1.79	\N	\N	0.03	106.4	\N	\N	1.79	\N	\N	\N	\N	\N	\N	\N	\N	\N	\N	1994-06-05 00:00:00	刘越兰	510703199406053128
4	616	2	3	0	103309300035	511224198108225340	2	32	2	2	2	1	1	3	1	\N	1	1	155	51.8	76	21.5609	77	99	11	-2	\N	\N	1.92	\N	\N	0.02	-2	\N	\N	1.92	\N	\N	\N	\N	\N	\N	\N	\N	\N	\N	1981-08-22 00:00:00	曾贵	511224198108225340
4	624	2	3	0	103311180019	510703199209133110	1	21	1	1	1	1	1	3	2	2	1	1	165	60.2	76	22.112	68	122	25	2.98	\N	\N	6.06	\N	\N	0	2.98	0.319	1.46	6.06	\N	\N	\N	\N	\N	\N	\N	\N	\N	\N	1992-09-13 00:00:00	张阳	510703199209133110
4	626	2	3	0	103310260052	510703199803173123	2	15	1	1	1	1	1	3	1	\N	1	1	155	44.7	66	18.6056	57	91	15	24	\N	\N	1.93	\N	\N	-2	24	\N	\N	1.93	\N	\N	\N	\N	\N	\N	\N	\N	\N	\N	1998-03-17 00:00:00	李云云	510703199803173123
4	638	2	3	0	103308200053	510703199508053129	2	18	1	1	1	1	1	3	1	\N	1	1	150	43.3	62	19.2444	66	117	14	61.9	\N	\N	1.86	\N	\N	0.02	61.9	\N	\N	1.86	\N	\N	\N	\N	\N	\N	\N	\N	\N	\N	1995-08-05 00:00:00	谢婷婷	510703199508053129
4	643	2	3	0	103310110027	510703199110023122	2	22	1	1	1	1	1	3	1	\N	1	1	155	57	74	23.7253	80	133	15	1.85	\N	\N	0.11	\N	\N	0	1.85	0.304	1.72	0.11	\N	\N	\N	\N	\N	\N	\N	\N	\N	\N	1991-10-02 00:00:00	杨莎莎	510703199110023122
4	648	2	3	0	103401160012	510703198808033125	2	25	1	1	1	1	1	3	1	\N	1	1	158	49.1	68	19.6683	57	108	16	0	\N	\N	0.17	\N	\N	0	0	0.257	2.14	0.17	\N	\N	\N	\N	\N	\N	\N	\N	\N	\N	1988-08-03 00:00:00	李倩	510703198808033125
4	682	1	3	0	106310110123	510703199109102421	2	22	1	1	1	1	3	1	1	\N	1	1	160	47	67	18.3594	60	100	8	3.4	\N	\N	0.2	\N	\N	0.01	3.4	0.497	1.54	0.2	\N	\N	\N	\N	\N	\N	\N	\N	\N	\N	1991-09-10 00:00:00	曹丹	510703199109102421
4	695	1	3	0	106310130005	510721196708040866	2	46	2	3	2	1	2	3	1	\N	1	1	140	52	78	26.5306	76	136	13	0.23	\N	\N	0.04	\N	\N	0	0.23	0.38	1.6	0.04	\N	\N	\N	\N	\N	\N	\N	\N	\N	\N	1967-08-04 00:00:00	刘国容	510721196708040866
4	738	1	3	0	106311040017	510702196802023131	1	45	2	3	2	1	3	3	1	\N	1	1	160	62	70	24.2188	74	134	42	0.98	\N	\N	8.73	\N	\N	0	0.98	0.345	0.59	8.73	\N	\N	\N	\N	\N	\N	\N	\N	\N	\N	1968-02-02 00:00:00	黄世军	510702196802023131
4	746	1	3	0	106310080053	510702195603143128	2	57	3	3	3	1	1	1	1	\N	1	1	148	53	83	24.1965	80	136	12	110.4	\N	\N	0.34	\N	\N	0	110.4	0.349	1.57	0.34	\N	\N	\N	\N	\N	\N	\N	\N	\N	\N	1956-03-14 00:00:00	李秀英	510702195603143128
4	750	1	3	0	106310080023	510702195708213129	2	56	3	3	3	1	3	1	1	\N	1	1	160	51	75	19.9219	80	142	39	0.05	\N	\N	0.13	\N	\N	0	0.05	0.351	1.73	0.13	\N	\N	\N	\N	\N	\N	\N	\N	\N	\N	1957-08-21 00:00:00	刘素兰	510702195708213129
4	765	1	3	0	106310270019	510702195509153127	2	58	3	3	3	1	1	3	1	3	1	1	145	53	60	25.2081	60	108	13	1.22	\N	\N	9.16	\N	\N	0	1.22	0.316	1.42	9.16	\N	\N	\N	\N	\N	\N	\N	\N	\N	\N	1955-09-15 00:00:00	魏心秀	510702195509153127
4	782	1	3	0	106310290101	510702196006123123	2	53	3	3	3	1	1	1	1	\N	1	1	150	58	78.01	25.7778	80	120	21	0	\N	\N	6.19	\N	\N	0	0	0.31	1.23	6.19	\N	\N	\N	\N	\N	\N	\N	\N	\N	\N	1960-06-12 00:00:00	黄世琼	510702196006123123
4	783	1	3	0	106311050028	510702197607282810	1	37	2	2	2	1	3	1	2	2	1	1	165	73	85	26.8136	66	126	27	0	\N	\N	0.15	\N	\N	0	0	0.324	1.88	0.15	\N	\N	\N	\N	\N	\N	\N	\N	\N	\N	1976-07-28 00:00:00	刘伟	510702197607282810
4	789	1	3	0	106310120073	510702197002273129	2	43	2	2	2	1	3	1	1	\N	1	1	157	70	88	28.3987	70	126	33	23.01	\N	\N	2.01	\N	\N	0	23.01	0.326	1.48	2.01	\N	\N	\N	\N	\N	\N	\N	\N	\N	\N	1970-02-27 00:00:00	李桂琼	510702197002273129
4	807	1	3	0	106311040008	510702197112303130	1	41	2	2	2	1	1	3	1	\N	1	1	172	71	80	23.9995	72	132	38	14.21	\N	\N	5.34	\N	\N	0	14.21	0.393	1.14	5.34	\N	\N	\N	\N	\N	\N	\N	\N	\N	\N	1971-12-30 00:00:00	钟太明	510702197112303130
4	808	1	3	0	106307220038	510702195703263127	2	56	3	3	3	1	1	3	1	\N	1	1	153	55	84	23.4952	110	173	22	7.11	\N	\N	2.71	\N	\N	0	7.11	0.326	1.11	2.71	\N	\N	\N	\N	\N	\N	\N	\N	\N	\N	1957-03-26 00:00:00	潘昌菊	510702195703263127
4	819	1	3	0	106310290111	510702196807223116	1	45	2	3	2	1	2	1	3	2	1	1	170	70	80	24.2215	88	138	34	0.09	\N	\N	0.11	\N	\N	0	0.09	0.339	1.96	0.11	\N	\N	\N	\N	\N	\N	\N	\N	\N	\N	1968-07-22 00:00:00	刘太雄	510702196807223116
4	828	1	3	0	106310280095	510223198103034716	1	32	2	2	2	1	3	1	2	2	1	1	170	59	71	20.4152	80	130	15	0	\N	\N	0.25	\N	\N	0.01	0	0.354	1.71	0.25	\N	\N	\N	\N	\N	\N	\N	\N	\N	\N	1981-03-03 00:00:00	周杨	510223198103034716
4	830	1	3	0	106308130018	510703198701292426	2	26	1	1	1	1	2	1	1	\N	1	1	165	60	81	22.0386	60	93	21	0.07	\N	\N	0.15	\N	\N	0	0.07	0.301	1.97	0.15	\N	\N	\N	\N	\N	\N	\N	\N	\N	\N	1987-01-29 00:00:00	陈春梅	510703198701292426
4	838	1	3	0	106311100027	53272919710804002X	2	42	2	2	2	2	1	1	1	\N	1	3	153	69	83	29.4758	64	150	41	1.19	\N	\N	5.35	\N	\N	0	1.19	0.347	0.3	5.35	\N	\N	\N	\N	\N	\N	\N	\N	\N	\N	1971-08-04 00:00:00	刀永琼	53272919710804002X
4	852	1	3	0	106308150048	510702196012243113	1	52	3	3	3	1	3	1	1	\N	1	1	153.5	45	65	19.0983	76	116	29	19.57	\N	\N	2.57	\N	\N	0	19.57	0.354	0.79	2.57	\N	\N	\N	\N	\N	\N	\N	\N	\N	\N	1960-12-24 00:00:00	唐清礼	510702196012243113
4	862	1	3	0	106311150001	51070219680623311X	1	45	2	3	2	1	3	1	2	4	1	1	170	70	89	24.2215	84	120	32	6.98	\N	\N	7.49	\N	\N	0	6.98	0.316	1.23	7.49	\N	\N	\N	\N	\N	\N	\N	\N	\N	\N	1968-06-23 00:00:00	张道洋	51070219680623311X
4	865	1	3	0	106311080024	510702197012043116	1	42	2	2	2	1	3	3	1	3	1	1	168	75	85	26.5731	78	116	16	8.13	\N	\N	0.17	\N	\N	0	8.13	0.346	1.73	0.17	\N	\N	\N	\N	\N	\N	\N	\N	\N	\N	1970-12-04 00:00:00	张道伟	510702197012043116
4	880	1	3	0	106310240120	510724197101112441	2	42	2	2	2	1	1	3	1	\N	1	1	150	75	93	33.3333	80	134	23	0	\N	\N	0.15	\N	\N	0	0	0.333	1.06	0.15	\N	\N	\N	\N	\N	\N	\N	\N	\N	\N	1971-01-11 00:00:00	文安蓉	510724197101112441
4	891	1	3	0	106308220023	510702196304052925	2	50	3	3	3	1	3	1	1	\N	2	1	147	72	103.5	33.3195	108	166	30	11.11	\N	\N	3.01	\N	\N	0	11.11	0.331	1.59	3.01	\N	\N	\N	\N	\N	\N	\N	\N	\N	\N	1963-04-05 00:00:00	党世英	510702196304052925
4	899	1	3	0	106308120033	510703196802122427	2	45	2	3	2	1	3	1	1	\N	3	1	154	66	100	27.8293	78	112	20	0	\N	\N	0.11	\N	\N	0.01	0	0.289	1.92	0.11	\N	\N	\N	\N	\N	\N	\N	\N	\N	\N	1968-02-12 00:00:00	莫仕英	510703196802122427
4	903	1	3	0	106308260009	510702197409283126	2	38	2	2	2	1	1	3	1	\N	1	1	161	47	68	18.132	60	92	14	0.08	\N	\N	7.96	\N	\N	0	0.08	0.344	1.25	7.96	\N	\N	\N	\N	\N	\N	\N	\N	\N	\N	1974-09-28 00:00:00	魏春蓉	510702197409283126
4	909	1	3	0	106308160019	510703199303072422	2	20	1	1	1	1	2	3	1	\N	1	1	162.5	45	64	17.0414	76	104	23	18.02	\N	\N	0.55	\N	\N	0.01	18.02	0.36	1.97	0.55	\N	\N	\N	\N	\N	\N	\N	\N	\N	\N	1993-03-07 00:00:00	张玉坤	510703199303072422
4	921	1	3	0	106308260029	510702195403063115	1	59	3	3	3	1	3	1	2	4	1	1	160	50	71	19.5312	102	168	21	2.11	\N	\N	6.48	\N	\N	0	2.11	0.31	0.3	6.48	\N	\N	\N	\N	\N	\N	\N	\N	\N	\N	1954-03-06 00:00:00	谭加财	510702195403063115
4	925	1	3	0	106310110071	510703199101232424	2	22	1	1	1	1	3	1	1	\N	1	1	150	42	62	18.6667	74	130	12	0	\N	\N	0.21	\N	\N	0	0	0.335	2.01	0.21	\N	\N	\N	\N	\N	\N	\N	\N	\N	\N	1991-01-23 00:00:00	夏燕	510703199101232424
4	935	1	3	0	106310110120	510702197009023114	1	43	2	2	2	1	1	1	1	4	1	1	157	60	77	24.3418	70	144	20	2.08	\N	\N	9.07	\N	\N	0	2.08	0.314	0.14	9.07	\N	\N	\N	\N	\N	\N	\N	\N	\N	\N	1970-09-02 00:00:00	夏治强	510702197009023114
4	969	1	3	0	106310250067	510702196302033114	1	50	3	3	3	1	1	3	1	2	1	1	160	55	70	21.4844	80	128	56	15.62	\N	\N	4.21	\N	\N	0	15.62	0.777	1.15	4.21	\N	\N	\N	\N	\N	\N	\N	\N	\N	\N	1963-02-03 00:00:00	陈长建	510702196302033114
4	1010	1	3	0	106307290013	510824197911302234	1	33	2	2	2	1	1	3	2	\N	1	1	170	66	84	22.8374	74	114	30	4.39	\N	\N	7.44	\N	\N	0	4.39	0.319	0.08	7.44	\N	\N	\N	\N	\N	\N	\N	\N	\N	\N	1979-11-30 00:00:00	王咸东	510824197911302234
4	1032	1	3	0	106308070095	510922196512213056	1	47	2	3	2	1	1	1	2	4	1	1	163	51	70	19.1953	74	112	31	1.31	\N	\N	9.32	\N	\N	0	1.31	0.428	1.21	9.32	\N	\N	\N	\N	\N	\N	\N	\N	\N	\N	1965-12-21 00:00:00	董华平	510922196512213056
4	1033	1	3	0	106308070033	510702196109123118	1	51	3	3	3	1	1	1	2	\N	1	1	157	50	71	20.2848	50	102	27	0.39	\N	\N	1.03	\N	\N	0	0.39	0.344	1.03	1.03	\N	\N	\N	\N	\N	\N	\N	\N	\N	\N	1961-09-12 00:00:00	刘喜贵	510702196109123118
4	1058	1	3	0	106309120146	510703199809202415	1	14	1	1	1	1	2	3	1	\N	1	1	170	47	59	16.263	\N	\N	13	2.11	\N	\N	0.12	\N	\N	0.56	2.11	2.05	0.04	0.12	\N	\N	\N	\N	\N	\N	\N	\N	\N	\N	1998-09-20 00:00:00	吴林	510703199809202415
4	1059	1	3	0	106309120153	510781199810260849	2	14	1	1	1	1	2	3	1	\N	1	1	149	50	63	22.5215	\N	\N	21	0.51	\N	\N	0.09	\N	\N	0	0.51	0.351	1.97	0.09	\N	\N	\N	\N	\N	\N	\N	\N	\N	\N	1998-10-26 00:00:00	李顺华	510781199810260849
4	1069	1	3	0	106309120199	510722199805117909	2	15	1	1	1	1	2	3	1	\N	1	1	155	51	87	21.2279	\N	\N	8	1.44	\N	\N	0.23	\N	\N	0	1.44	0.311	1.79	0.23	\N	\N	\N	\N	\N	\N	\N	\N	\N	\N	1998-05-11 00:00:00	王金玉	510722199805117909
4	1073	1	3	0	106310250003	510702196702123127	2	46	2	3	2	1	1	3	1	\N	1	1	152	50	76	21.6413	60	100	19	0.03	\N	\N	0.22	\N	\N	0	0.03	0.326	1.94	0.22	\N	\N	\N	\N	\N	\N	\N	\N	\N	\N	1967-02-12 00:00:00	黄烈华	510702196702123127
4	1074	1	3	0	106310290066	510702197805152822	2	35	2	2	2	1	3	3	1	\N	1	1	160	71	83	27.7344	86	122	64	2.14	\N	\N	0.09	\N	\N	0	2.14	0.303	1.71	0.09	\N	\N	\N	\N	\N	\N	\N	\N	\N	\N	1978-05-15 00:00:00	陈小兰	510702197805152822
4	1108	1	3	0	106309030036	510702196606063128	2	47	2	3	2	1	3	3	1	\N	1	1	153	56	78	23.9224	60	106	18	0.2	\N	\N	0.09	\N	\N	0	0.2	0.312	1.78	0.09	\N	\N	\N	\N	\N	\N	\N	\N	\N	\N	1966-06-06 00:00:00	向文碧	510702196606063128
4	1110	1	3	0	106310280172	510702197501123117	1	38	2	2	2	1	3	3	2	4	1	1	177	60	76	19.1516	80	112	32	0.21	\N	\N	4.34	\N	\N	0	0.21	0.288	1.42	4.34	\N	\N	\N	\N	\N	\N	\N	\N	\N	\N	1975-01-12 00:00:00	罗仲华	510702197501123117
4	1118	1	3	0	106310300126	510703197902192427	2	34	2	2	2	1	2	3	1	\N	1	1	160	78	86	30.4688	88	124	29	12.41	\N	\N	3.83	\N	\N	0	12.41	0.31	1.31	3.83	\N	\N	\N	\N	\N	\N	\N	\N	\N	\N	1979-02-19 00:00:00	谢辉	510703197902192427
4	1123	1	3	0	106309020025	510702195411013134	1	58	3	3	3	1	1	3	2	\N	2	1	160	70	91	27.3438	93	136	46	3	\N	\N	8.93	\N	\N	0	3	0.311	0.64	8.93	\N	\N	\N	\N	\N	\N	\N	\N	\N	\N	1954-11-01 00:00:00	朱祖荣	510702195411013134
4	1132	1	3	0	106310180078	510702196208123113	1	51	3	3	3	1	1	3	2	2	1	1	169	80	98	28.0102	88	120	23	6.7	\N	\N	5.06	\N	\N	0	6.7	0.279	1.35	5.06	\N	\N	\N	\N	\N	\N	\N	\N	\N	\N	1962-08-12 00:00:00	李孝江	510702196208123113
4	1138	1	3	0	106308300023	510702195503103129	2	58	3	3	3	1	1	3	1	\N	1	1	154	53	78	22.3478	68	134	15	2.5	\N	\N	3.74	\N	\N	0	2.5	0.392	0.67	3.74	\N	\N	\N	\N	\N	\N	\N	\N	\N	\N	1955-03-10 00:00:00	许秀华	510702195503103129
4	1139	1	3	0	106310290050	510703198604022459	1	27	1	1	1	1	3	3	1	2	1	1	173	60	67	20.0474	75	106	30	0	\N	\N	0.09	\N	\N	0	0	0.335	1.83	0.09	\N	\N	\N	\N	\N	\N	\N	\N	\N	\N	1986-04-02 00:00:00	王林	510703198604022459
4	1148	1	3	0	106310120113	510702196203013126	2	51	3	3	3	1	1	3	1	\N	1	1	157	61	77	24.7475	82	120	31	4.28	\N	\N	6.83	\N	\N	0.01	4.28	0.333	1.19	6.83	\N	\N	\N	\N	\N	\N	\N	\N	\N	\N	1962-03-01 00:00:00	龚桂华	510702196203013126
4	1157	1	3	0	106308300031	510702197302133128	2	40	2	2	2	1	1	3	1	\N	1	1	155	53	73	22.0604	76	130	28	0	\N	\N	0.21	\N	\N	0	0	0.321	1.81	0.21	\N	\N	\N	\N	\N	\N	\N	\N	\N	\N	1973-02-13 00:00:00	吴远秀	510702197302133128
4	1167	1	3	0	106309100011	510703198706192432	1	26	1	1	1	1	2	3	2	2	1	1	170	50.5	71.5	17.474	70	128	19	3.36	\N	\N	0.09	\N	\N	0	3.36	0.311	1.89	0.09	\N	\N	\N	\N	\N	\N	\N	\N	\N	\N	1987-06-19 00:00:00	许明松	510703198706192432
4	1170	1	3	0	106310260101	510721196602196344	2	47	2	3	2	1	1	3	1	\N	1	1	154	41	68	17.2879	58	109	14	0.88	\N	\N	9.17	\N	\N	0	0.88	0.307	0.91	9.17	\N	\N	\N	\N	\N	\N	\N	\N	\N	\N	1966-02-19 00:00:00	高光碧	510721196602196344
4	1176	1	3	0	106310260142	510702196204273122	2	51	3	3	3	1	1	3	1	\N	1	1	146	64	88	30.0244	82	132	53	0	\N	\N	8.99	\N	\N	0	0	0.298	0.95	8.99	\N	\N	\N	\N	\N	\N	\N	\N	\N	\N	1962-04-27 00:00:00	冯仕珍	510702196204273122
4	1194	1	3	0	106309090042	51070219671210312X	2	45	2	3	2	1	3	3	1	\N	1	1	153	50	72	21.3593	76	134	14	1.95	\N	\N	9.18	\N	\N	0	1.95	0.338	0.84	9.18	\N	\N	\N	\N	\N	\N	\N	\N	\N	\N	1967-12-10 00:00:00	肖玉华	51070219671210312X
4	1199	1	3	0	106310280138	510921199303303968	2	20	1	1	1	1	1	3	1	\N	1	1	155	43	66	17.898	78	115	22	0.06	\N	\N	0.14	\N	\N	0	0.06	0.345	1.84	0.14	\N	\N	\N	\N	\N	\N	\N	\N	\N	\N	1993-03-30 00:00:00	赵慧	510921199303303968
4	1208	1	3	0	106308300065	510702197401203136	1	39	2	2	2	1	3	3	3	4	1	1	168	50	75	17.7154	74	110	20	0	\N	\N	0.19	\N	\N	0	0	0.291	1.93	0.19	\N	\N	\N	\N	\N	\N	\N	\N	\N	\N	1974-01-20 00:00:00	刘文华	510702197401203136
4	1222	1	3	0	106310270157	510703198701062428	2	26	1	1	1	1	3	3	1	\N	1	1	160	50	60	19.5312	80	114	23	0.63	\N	\N	9.2	\N	\N	0	0.63	0.321	0.41	9.2	\N	\N	\N	\N	\N	\N	\N	\N	\N	\N	1987-01-06 00:00:00	黄春喜	510703198701062428
4	1232	1	3	0	106310270214	510703199206292431	1	21	1	1	1	1	1	3	1	2	1	1	167	57	67	20.4382	70	128	26	0.57	\N	\N	0.14	\N	\N	0	0.57	0.36	1.8	0.14	\N	\N	\N	\N	\N	\N	\N	\N	\N	\N	1992-06-29 00:00:00	张宇	510703199206292431
4	1238	1	3	0	106310190111	510703198603222432	1	27	1	1	1	1	3	3	2	\N	1	1	175	88	94	28.7347	82	120	27	2.42	\N	\N	0.29	\N	\N	0.48	2.42	1.825	0.01	0.29	\N	\N	\N	\N	\N	\N	\N	\N	\N	\N	1986-03-22 00:00:00	张林	510703198603222432
4	1244	1	3	0	106310280116	510704198402164922	2	29	1	1	1	1	1	3	1	\N	1	1	167	50	67	17.9282	83	111	26	8.38	\N	\N	0.44	\N	\N	0	8.38	0.312	1.72	0.44	\N	\N	\N	\N	\N	\N	\N	\N	\N	\N	1984-02-16 00:00:00	李海英	510704198402164922
4	1246	1	3	0	106310210140	510727197410163321	2	39	2	2	2	2	1	3	1	\N	1	1	155	43	66	17.898	60	104	17	0.53	\N	\N	0.08	\N	\N	0	0.53	0.58	1.59	0.08	\N	\N	\N	\N	\N	\N	\N	\N	\N	\N	1974-10-16 00:00:00	张静	510727197410163321
4	1250	1	3	0	106310170011	510703198701082410	1	26	1	1	1	1	1	3	2	3	1	1	175	76	80	24.8163	62	120	19	157.55	\N	\N	5.55	\N	\N	0.11	157.55	1.454	0.6	5.55	\N	\N	\N	\N	\N	\N	\N	\N	\N	\N	1987-01-08 00:00:00	杨元建	510703198701082410
4	1258	1	3	0	106310160047	510703198609032437	1	27	1	1	1	1	1	3	2	2	1	1	158	61	74	24.4352	92	146	26	0	\N	\N	0.15	\N	\N	0	0	0.29	1.55	0.15	\N	\N	\N	\N	\N	\N	\N	\N	\N	\N	1986-09-03 00:00:00	李波	510703198609032437
4	1262	1	3	0	106310160044	510703199210142444	2	21	1	1	1	1	2	3	1	\N	1	1	150	44	57	19.5556	54	84	25	11.05	\N	\N	0.09	\N	\N	0	11.05	0.309	1.89	0.09	\N	\N	\N	\N	\N	\N	\N	\N	\N	\N	1992-10-14 00:00:00	李丽	510703199210142444
4	1263	1	3	0	106311030049	510781198807232009	2	25	1	1	1	1	3	3	1	\N	1	1	170	52	65	17.9931	72	110	28	0.06	\N	\N	0.11	\N	\N	0	0.06	0.326	1.77	0.11	\N	\N	\N	\N	\N	\N	\N	\N	\N	\N	1988-07-23 00:00:00	何小蓉	510781198807232009
4	1272	1	3	0	106309040021	510703199211092426	2	20	1	1	1	1	1	3	1	\N	1	1	160	55	72	21.4844	75	110	37	2.77	\N	\N	0.13	\N	\N	0	2.77	0.328	1.92	0.13	\N	\N	\N	\N	\N	\N	\N	\N	\N	\N	1992-11-09 00:00:00	吴冬梅	510703199211092426
4	1287	1	3	0	106310190047	510703198606112415	1	27	1	1	1	1	1	3	1	2	1	1	180	87	90	26.8519	80	116	35	16.94	\N	\N	0.18	\N	\N	0	16.94	0.305	1.86	0.18	\N	\N	\N	\N	\N	\N	\N	\N	\N	\N	1986-06-11 00:00:00	魏庆伟	510703198606112415
4	1293	1	3	0	106310300097	510703198109112422	2	32	2	2	2	1	3	3	1	\N	1	1	162	65	85	24.7676	74	124	22	26.23	\N	\N	5.26	\N	\N	0	26.23	0.3	1.24	5.26	\N	\N	\N	\N	\N	\N	\N	\N	\N	\N	1981-09-11 00:00:00	张芳	510703198109112422
4	1299	1	3	0	106310300059	510703198912162410	1	23	1	1	1	1	1	3	2	\N	1	1	172	65	77	21.9713	74	120	143	0.05	\N	\N	0.08	\N	\N	0	0.05	0.304	2.04	0.08	\N	\N	\N	\N	\N	\N	\N	\N	\N	\N	1989-12-16 00:00:00	陈潇	510703198912162410
4	1300	1	3	0	106309020053	510704198607054516	1	27	1	1	1	1	2	3	1	\N	2	1	170	75	90	25.9516	80	138	77	0	\N	\N	0.06	\N	\N	0.01	0	0.344	1.83	0.06	\N	\N	\N	\N	\N	\N	\N	\N	\N	\N	1986-07-05 00:00:00	张简	510704198607054516
4	1301	1	3	0	106307210015	510703198704302423	2	26	1	1	1	1	2	3	1	\N	1	1	165	46	64	16.8962	54	98	7	1.67	\N	\N	0.11	\N	\N	0	1.67	0.338	1.95	0.11	\N	\N	\N	\N	\N	\N	\N	\N	\N	\N	1987-04-30 00:00:00	刘静	510703198704302423
4	1305	1	3	0	106310220094	51302219820210106X	2	31	2	2	2	1	2	3	1	\N	1	1	158	55	63	22.0317	72	110	28	0	\N	\N	0.06	\N	\N	0	0	0.362	1.87	0.06	\N	\N	\N	\N	\N	\N	\N	\N	\N	\N	1982-02-10 00:00:00	何丽	51302219820210106X
4	1306	1	3	0	106310200106	430522199103282669	2	22	1	1	1	1	1	3	1	\N	1	1	150	43	65	19.1111	70	106	56	0.06	\N	\N	0.36	\N	\N	0	0.06	0.335	1.77	0.36	\N	\N	\N	\N	\N	\N	\N	\N	\N	\N	1991-03-28 00:00:00	刘采莲	430522199103282669
4	1316	1	3	0	106311070070	510703199207282438	1	21	1	1	1	1	3	3	2	\N	1	1	185	65	75	18.992	70	108	21	0.1	\N	\N	0.11	\N	\N	0.02	0.1	0.3	1.94	0.11	\N	\N	\N	\N	\N	\N	\N	\N	\N	\N	1992-07-28 00:00:00	魏园园	510703199207282438
4	1318	1	3	0	106310180021	510703199108032433	1	22	1	1	1	1	1	3	1	\N	1	1	160	50	83	19.5312	66	128	43	0.06	\N	\N	0.09	\N	\N	0.03	0.06	0.331	1.77	0.09	\N	\N	\N	\N	\N	\N	\N	\N	\N	\N	1991-08-03 00:00:00	罗源	510703199108032433
4	1323	1	3	0	106308060023	510224197608263049	2	36	2	2	2	1	2	1	1	\N	1	1	156	50	67	20.5457	64	122	8	0.14	\N	\N	0.19	\N	\N	0	0.14	0.321	1.8	0.19	\N	\N	\N	\N	\N	\N	\N	\N	\N	\N	1976-08-26 00:00:00	罗利娟	510224197608263049
4	1327	1	3	0	106308290015	510726197910051012	1	33	2	2	2	2	3	1	1	2	1	1	176	50	66	16.1415	68	106	20	1.37	\N	\N	0.08	\N	\N	0.02	1.37	0.725	0.83	0.08	\N	\N	\N	\N	\N	\N	\N	\N	\N	\N	1979-10-05 00:00:00	刘兵	510726197910051012
4	1328	1	3	0	106311050001	510703198904052414	1	24	1	1	1	1	2	1	1	2	1	1	180	89	88	27.4691	86	134	54	0.08	\N	\N	0.19	\N	\N	0	0.08	0.363	1.95	0.19	\N	\N	\N	\N	\N	\N	\N	\N	\N	\N	1989-04-05 00:00:00	张强	510703198904052414
4	1329	1	3	0	106311120018	510703199403252420	2	19	1	1	1	1	2	3	1	\N	1	1	153	43	60	18.369	62	96	19	0.27	\N	\N	0.1	\N	\N	0	0.27	0.331	2	0.1	\N	\N	\N	\N	\N	\N	\N	\N	\N	\N	1994-03-25 00:00:00	魏欢	510703199403252420
4	1334	1	3	0	106310290216	510723199311281684	2	19	1	1	1	1	1	1	1	\N	1	1	165	52	75	19.1001	60	102	16	0.02	\N	\N	0.14	\N	\N	0	0.02	0.312	1.9	0.14	\N	\N	\N	\N	\N	\N	\N	\N	\N	\N	1993-11-28 00:00:00	张瑶瑶	510723199311281684
4	1335	1	3	0	106308080077	511324198707011921	2	26	1	1	1	1	2	1	1	\N	1	1	161	51	77	19.6752	76	114	15	1.72	\N	\N	0.53	\N	\N	0.51	1.72	1.877	1.04	0.53	\N	\N	\N	\N	\N	\N	\N	\N	\N	\N	1987-07-01 00:00:00	杨红梅	511324198707011921
4	1336	1	3	0	106310300202	511025198207034430	1	31	2	2	2	1	2	1	1	\N	1	1	167	55	70	19.721	62	118	41	7.5	\N	\N	8.39	\N	\N	0	7.5	0.329	1.4	8.39	\N	\N	\N	\N	\N	\N	\N	\N	\N	\N	1982-07-03 00:00:00	张林	511025198207034430
4	1340	1	3	0	106310130133	510703197910202429	2	33	2	2	2	1	2	1	1	\N	1	1	157	55	70	22.3133	60	102	41	0.02	\N	\N	0.18	\N	\N	0	0.02	0.303	1.81	0.18	\N	\N	\N	\N	\N	\N	\N	\N	\N	\N	1979-10-20 00:00:00	刘欣艳	510703197910202429
4	1352	1	3	0	106311040042	511023198110170169	2	32	2	2	2	1	1	1	1	\N	1	1	148	49	68	22.3703	60	105	25	4.15	\N	\N	0.12	\N	\N	0	4.15	0.35	1.82	0.12	\N	\N	\N	\N	\N	\N	\N	\N	\N	\N	1981-10-17 00:00:00	王建红	511023198110170169
1	28	2	3	3	103309210001	510702196612275418	1	46	2	3	2	1	1	3	1	2	1	1	161	72	98	27.7767	96	152	56	20.4	1001	1001	1.42	0.09	0.08	0.13	20.4	\N	\N	1.42	0	1001	0.342	1.68	0.09	0	1001	\N	\N	0.08	1966-12-27 00:00:00	郑华元	510702196612275418
1	98	2	3	1	103311040054	510702197404125516	1	39	2	2	2	1	1	3	1	4	1	1	160	62.5	75	24.4141	84	126	41	-2	72.99	72.99	1.59	9.8	\N	0.08	-2	\N	\N	1.59	0.01	72.99	0.36	0.02	9.8	\N	72.99	\N	\N	\N	1974-04-12 00:00:00	王用海	510702197404125516
1	133	2	3	1	103308060045	510702196509265449	2	47	2	3	2	1	3	3	1	\N	1	1	149	61	91	27.4762	73	134	39	0.64	15.78	15.78	8.82	9.41	\N	0.39	0.64	0.314	0.05	8.82	0.11	15.78	0.766	0.04	9.41	\N	15.78	\N	\N	\N	1965-09-26 00:00:00	李家琼	510702196509265449
1	134	2	3	3	103310180078	510702195510275420	2	57	3	3	3	1	1	3	1	\N	1	1	150	54.9	88	24.4	79	141	14	0	3.93	3.93	10.19	1.98	10.81	0.14	0	0.341	0.05	10.19	2.48	3.93	4.683	0	1.98	0.03	3.93	\N	\N	10.81	1955-10-27 00:00:00	周素群	510702195510275420
1	166	2	3	3	103309210026	51070219631022544X	2	49	2	3	2	1	1	3	1	\N	1	1	162	68.9	90	26.2536	61	109	20	1.9	0.81	0.81	9.56	10.71	9.72	0.13	1.9	0.305	0.14	9.56	0.08	0.81	0.341	0.07	10.71	0	0.81	\N	\N	9.72	1963-10-22 00:00:00	刘昌兰	51070219631022544X
1	196	2	3	2	103311020012	510702195408155529	2	59	3	3	3	1	1	3	1	\N	1	1	155	65.7	88	27.3465	89	149	27	30.48	\N	\N	9.57	\N	5.2	0.89	30.48	4.222	0	9.57	\N	\N	\N	\N	\N	0.01	\N	\N	\N	5.2	1954-08-15 00:00:00	郭秀华	510702195408155529
1	200	2	3	3	103310100018	510722198203032567	2	31	2	2	2	1	1	3	1	\N	1	1	145	39.9	66	18.9774	82	132	21	3.09	1.51	1.51	10.54	11.17	10.03	1.2	3.09	0.33	0.04	10.54	1.22	1.51	0.305	0.01	11.17	6.3	1.51	0.01	0.326	10.03	1982-03-03 00:00:00	林小华	510722198203032567
1	213	2	3	2	103309230077	510602197310295148	2	39	2	2	2	1	1	3	1	\N	1	1	155	48.6	69	20.2289	62	108	12	50.54	\N	\N	8.14	\N	0.19	0	50.54	0.288	0.88	8.14	\N	\N	\N	\N	\N	0	\N	\N	\N	0.19	1973-10-29 00:00:00	廖丽华	510602197310295148
1	222	2	3	3	103309280051	510702195703115423	2	56	3	3	3	1	1	3	1	\N	1	1	140	54.9	73	28.0102	78	137	22	5.27	10.8	10.8	10.04	9.06	8.56	1.43	5.27	0.328	0.59	10.04	0.41	10.8	0.626	0.53	9.06	0	10.8	\N	\N	8.56	1957-03-11 00:00:00	何德秀	510702195703115423
1	243	2	3	1	103309220044	510726198505022618	1	28	1	1	1	2	1	3	1	\N	1	1	170	65.3	82	22.5952	72	120	34	-2	23.89	23.89	0.843	0.08	\N	0.06	-2	\N	\N	0.843	0	23.89	0.307	1.71	0.08	\N	23.89	\N	\N	\N	1985-05-02 00:00:00	张小平	510726198505022618
1	252	2	3	1	103311060063	510702197111155041	2	41	2	2	2	1	3	3	1	\N	1	1	149	49.3	65	22.2062	72	112	9	0.9	1001	1001	9.71	0.13	\N	0.49	0.9	0.292	0.04	9.71	0	1001	0.311	2.09	0.13	\N	1001	\N	\N	\N	1971-11-15 00:00:00	罗小琼	510702197111155041
1	386	2	3	1	103311100014	510703198710233110	1	26	1	1	1	1	1	3	1	\N	1	1	173	68.9	78	23.0212	62	126	48	2.51	0.98	0.98	9.75	9.45	\N	0.12	2.51	0.365	0.1	9.75	0.01	0.98	0.331	0.06	9.45	\N	0.98	\N	\N	\N	1987-10-23 00:00:00	赖伟	510703198710233110
1	392	2	3	3	103308290112	510702197202195444	2	41	2	2	2	1	1	3	1	\N	1	1	155	49.7	68	20.6868	71	113	20	2.93	9.02	9.02	11.84	11.19	10.87	75.73	2.93	0.311	0.01	11.84	82.08	9.02	0.34	0.03	11.19	49.54	9.02	0.325	0.01	10.87	1972-02-19 00:00:00	姜春华	510702197202195444
1	428	2	3	3	103308210031	51070319951112328X	2	17	1	1	1	1	2	3	1	\N	1	1	156	42.8	63	17.5871	73	116	16	1.552	1.48	1.48	9.93	10.4	9.64	0.25	1.552	0.351	0.05	9.93	0.28	1.48	0.291	0.02	10.4	0.51	1.48	0.325	0.02	9.64	1995-11-12 00:00:00	王芳	51070319951112328X
1	432	2	3	3	103309160098	510722197712178324	2	35	2	2	2	1	1	3	1	\N	1	1	170	62.3	74	21.5571	73	113	27	0.46	0.53	0.53	9.72	10.15	9.29	6.38	0.46	0.361	0.95	9.72	4.39	0.53	0.341	0.88	10.15	4.26	0.53	0.299	0.69	9.29	1977-12-17 00:00:00	刘秀华	510722197712178324
1	515	2	3	3	103309200045	510703199804033114	1	15	1	1	1	1	1	3	1	\N	1	1	165	43.2	60	15.8678	59	96	15	-2	1001	1001	1.55	0.07	0.09	0.07	-2	\N	\N	1.55	0.02	1001	0.34	1.39	0.07	0	1001	\N	\N	0.09	1998-04-03 00:00:00	程红亮	510703199804033114
1	522	2	3	2	103311190004	510703199305013127	2	20	1	1	1	1	1	3	1	\N	1	1	162	71.3	80	27.1681	82	135	13	244.4	\N	\N	1.91	\N	0.25	-2	244.4	\N	\N	1.91	\N	\N	\N	\N	\N	0	\N	\N	\N	0.25	1993-05-01 00:00:00	贾婷婷	510703199305013127
1	528	2	3	2	103312230009	513722198710135707	2	26	1	1	1	1	1	3	1	\N	1	1	152	53.3	68	23.0696	76	120	20	-2	\N	\N	1.59	\N	0.08	0.08	-2	\N	\N	1.59	\N	\N	\N	\N	\N	0	\N	\N	\N	0.08	1987-10-13 00:00:00	李兰玉	513722198710135707
1	561	2	3	1	103309110064	510722198210027563	2	30	2	2	2	1	1	3	1	\N	1	1	156	50.7	72	20.8333	64	105	13	3.84	2.43	2.43	11.16	11.67	\N	1.5	3.84	0.307	0.61	11.16	2.8	2.43	0.311	0.02	11.67	\N	2.43	\N	\N	\N	1982-10-02 00:00:00	李晓兰	510722198210027563
1	675	1	3	3	106310100114	510702196301183110	1	50	3	3	3	1	1	3	2	4	1	1	167	59	80	21.1553	86	124	19	1.36	1.01	1.01	9.07	9.32	10.24	1.41	1.36	0.354	0.12	9.07	0.37	1.01	0.377	0.02	9.32	0	1.01	\N	\N	10.24	1963-01-18 00:00:00	曾庆富	510702196301183110
1	685	1	3	3	106310130012	510702195704063135	1	56	3	3	3	1	2	1	1	3	1	1	168	78	85	27.6361	98	146	20	0.21	12.2	12.2	10.05	9.63	9.52	0.46	0.21	0.366	0.01	10.05	0	12.2	0.309	0.42	9.63	0.08	12.2	\N	\N	9.52	1957-04-06 00:00:00	蒋光元	510702195704063135
1	728	1	3	1	106310120015	510702196510113119	1	48	2	3	2	1	1	3	2	3	1	1	177	90	97	28.7274	92	136	20	0.11	0.05	0.05	10.98	11.68	\N	16.73	0.11	0.346	0.03	10.98	8.98	0.05	0.34	0.02	11.68	\N	0.05	\N	\N	\N	1965-10-11 00:00:00	晏斌	510702196510113119
1	785	1	3	1	106307210037	510702196302163138	1	50	3	3	3	1	1	3	2	2	1	1	168	65	86	23.03	89	145	11	0.36	7.82	7.82	1096	4.98	\N	0.34	0.36	0.329	0.01	1096	0	7.82	0.292	1.55	4.98	\N	7.82	\N	\N	\N	1963-02-16 00:00:00	杨荣忠	510702196302163138
1	813	1	3	3	106310310007	510703197610102418	1	37	2	2	2	1	1	1	1	\N	1	1	157	71	88	28.8044	60	102	48	0	999.11	999.11	10.59	3.39	10.52	1.69	0	0.354	0.01	10.59	0	999.11	0.311	1.51	3.39	0.24	999.11	\N	\N	10.52	1976-10-10 00:00:00	刘强	510703197610102418
1	826	1	3	3	106308120036	510702196002173123	2	53	3	3	3	1	3	1	1	\N	2	1	150	60	85	26.6667	86	148	13	1.3	1.89	1.89	10.81	11.42	9.98	0.32	1.3	0.326	0.01	10.81	0.1	1.89	0.356	0.02	11.42	0.01	1.89	0.221	0.02	9.98	1960-02-17 00:00:00	魏加凤	510702196002173123
1	843	1	3	1	106311090061	510703198406122416	1	29	1	1	1	1	3	1	1	\N	1	1	165	73	84	26.8136	96	120	40	0.83	78.25	78.25	10.68	4.46	\N	55.64	0.83	0.335	0.01	10.68	0	78.25	0.316	1.38	4.46	\N	78.25	\N	\N	\N	1984-06-12 00:00:00	陈达军	510703198406122416
1	855	1	3	1	106310280109	510702197111023110	1	41	2	2	2	1	2	1	1	2	1	1	165	75	85	27.5482	96	147	36	4.52	1001	1001	0.15	0.14	\N	0.19	4.52	1.29	0.06	0.15	0	1001	0.314	1.96	0.14	\N	1001	\N	\N	\N	1971-11-02 00:00:00	张道建	510702197111023110
1	922	1	3	3	106310160036	510702196209183126	2	51	3	3	3	1	1	1	1	\N	1	1	163	72	80	27.0993	100	140	15	9.62	14.27	14.27	10.17	10.1	9.79	7.15	9.62	0.345	0.01	10.17	8.38	14.27	0.373	0.02	10.1	2.35	14.27	0.25	0.02	9.79	1962-09-18 00:00:00	李春华	510702196209183126
1	943	1	3	3	106310300203	510702196402043117	1	49	2	3	2	1	3	3	2	4	1	1	175	70	85	22.8571	94	146	24	5.13	149.7	149.7	0.25	0.07	0.12	0.57	5.13	1.799	0.35	0.25	0	149.7	0.307	1.84	0.07	0.01	149.7	\N	\N	0.12	1964-02-04 00:00:00	魏道双	510702196402043117
1	959	1	3	3	106307240014	510702195411133128	2	58	3	3	3	1	1	3	1	\N	1	1	150	50	82	22.2222	86	139	24	-2	14.49	14.49	0.007	4.54	5.11	0.06	-2	\N	\N	0.007	0	14.49	0.327	1.24	4.54	0	14.49	\N	\N	5.11	1954-11-13 00:00:00	魏雪华	510702195411133128
1	964	1	3	1	106308230008	510702196310213123	2	49	2	3	2	1	3	3	1	\N	1	1	160	53	84	20.7031	74	126	15	2.31	1.45	1.45	3.42	10.39	\N	0.53	2.31	0.915	0.01	3.42	0.13	1.45	0.351	0.04	10.39	\N	1.45	\N	\N	\N	1963-10-21 00:00:00	王素华	510702196310213123
1	971	1	3	1	106307220022	510623197205298314	1	41	2	2	2	1	3	3	2	5	1	1	162	52	71	19.8141	74	114	162	9.09	1.93	1.93	4.01	11.38	\N	0.29	9.09	1.251	0.08	4.01	12.86	1.93	0.343	0.01	11.38	\N	1.93	\N	\N	\N	1972-05-29 00:00:00	代礼堂	510623197205298314
1	972	1	3	3	106308020064	510702196906173126	2	44	2	2	2	1	3	3	1	\N	1	1	155	54	84	22.4766	68	120	19	82.8	135.69	135.69	0.004	8.77	7.27	0.03	82.8	\N	\N	0.004	0	135.69	0.309	1.37	8.77	0.03	135.69	\N	\N	7.27	1969-06-17 00:00:00	李晓红	510702196906173126
1	1049	1	3	3	106310280239	510725198308248021	2	30	2	2	2	1	3	3	1	\N	1	1	148	49	65	22.3703	70	118	38	0.67	0.66	0.66	9.99	10.53	9.08	1.65	0.67	0.344	1.14	9.99	0.99	0.66	0.327	1.05	10.53	1.38	0.66	0.292	1.2	9.08	1983-08-24 00:00:00	卫彦琼	510725198308248021
1	1241	1	3	1	106310210006	51070319740117241X	1	39	2	2	2	1	1	3	2	2	1	1	162	58	78	22.1003	74	114	45	0.26	0.51	0.51	4.36	4.27	\N	0.21	0.26	0.631	1.31	4.36	0.16	0.51	0.509	1.4	4.27	\N	0.51	\N	\N	\N	1974-01-17 00:00:00	林波	51070319740117241X
1	1267	1	3	1	106310190046	510723198807062181	2	25	1	1	1	1	1	3	1	\N	1	1	160	64	78	25	66	106	19	0.14	128.73	128.73	11.13	9.26	\N	43.74	0.14	0.337	0.02	11.13	0	128.73	0.358	1.37	9.26	\N	128.73	\N	\N	\N	1988-07-06 00:00:00	石霞	510723198807062181
1	1309	1	3	1	106310280104	510703198411212416	1	28	1	1	1	1	3	3	1	2	1	1	173	58	68	19.3792	68	120	12	1.69	0.11	0.11	0.15	11.15	\N	0.06	1.69	0.333	1.5	0.15	0.76	0.11	0.318	0.01	11.15	\N	0.11	\N	\N	\N	1984-11-21 00:00:00	魏伟	510703198411212416
[truncated: 2 more columns]

## Sheet:  spss版1281人
是否剔除（0否，1剔1，2剔2，3剔3，4失访）	疫苗队列原始编码	VACCINATION_TYPE（1:016；2:012	VACCINATION_STATUS（打了几针）	随访状态：0.无随访；1.仅有一次随访（F1）；2.仅有一次随访（F2）；3.两次随访均有	sex赋值（1男2女）	AGE	age赋值（璇） 15-29; 30-49; 50-59	age赋值（娟） 15-29; 30-44; 45-59	age赋值（朋） 15-29; 30-49; 50-59	natinality赋值（1汉族2非汉族）	HISTORY_OF_VACCINATION（1: 无, 2: 有, 3: 不详）	MOTHER_HISTORY_OF_HB（1: 无, 2: 有, 3: 不详）	吸烟情况(1: 从不吸烟,2:现在吸烟, 3: 已戒烟,单选)	折合酒精量(1: 无, 2: <20g/天, 3: ≥20g/天,单选,【酒精含量（g）=饮酒量（ml）×乙醇含量（%）×0.8】)	既往史-高血压（1无2有3不详）	既往史-糖尿病（1无2有3不详）	身高(CM)	体重(KG)	腰围(CM)	BMI	收缩压	舒张压	ALT	HBsAb0（雅培）	HBsAb1	HBsAb2	HBcAb0（雅培）	HBcAb1	HBcAb2	CITIZEN_NAME	ID_CARD_NO	c.DABH
0	1	2	3	3	2	53	3	3	3	1	1	3	-1	-1	2	2	160.0	58.0	75.0	22.6562	149	91	30	340.83	482.53	0.55	1.24	9.09	3.79	钟洪玉	510502196003041922	103307310027
0	2	2	3	3	2	37	2	2	2	1	1	3	1	1	1	1	150.0	50.0	72.0	22.2222	118	76	39	323.83	1001	1001	8.11	8.96	8.43	李晓兰	510703197603103121	103309220019
0	3	2	3	3	1	57	3	3	3	1	3	3	1	2	1	1	171.0	63.1	75.1	21.5793	120	63	21	215.15	367.66	333.47	2.45	3.1	2.71	刘兴枢	51070219560606541X	103307310026
0	4	2	3	2	1	55	3	3	3	1	3	3	1	1	2	2	160.0	62.8	79.0	24.5312	142	92	77	10.54	\N	434.69	9.02	\N	8.48	刘兴贵	510702195708275418	103308120018
0	5	2	3	2	2	58	3	3	3	1	1	3	1	1	1	1	145.0	57.2	81.0	27.2057	152	90	202	10.28	\N	61.01	7.21	\N	6.16	李华琼	510702195412235441	103309190017
0	6	2	3	2	2	40	2	2	2	1	1	3	1	1	1	1	157.0	53.0	74.0	21.5019	138	87	18	25.03	\N	13.41	5.72	\N	5.13	贾琼蓉	510702197307045426	103308010037
0	8	2	3	2	2	58	3	3	3	1	3	3	-1	-1	1	1	158.0	57.1	98.0	22.8729	134	84	29	1.64	\N	1.01	3.14	\N	2.52	梁琼珍	510702195506305420	103308070003
0	9	2	3	3	2	45	2	3	2	1	3	3	1	1	1	1	150.0	54.9	76.0	24.4	103	64	26	1.9	12.97	116.13	0.56	0.53	0.51	李元蓉	510702196807205444	103308270039
0	10	2	3	3	1	41	2	2	2	1	1	3	2	1	1	1	164.0	49.6	66.0	18.4414	105	66	20	48.62	865.08	283.02	6.93	7.51	6.66	杨勇	510702197205025416	103308030021
0	11	2	3	3	2	22	1	1	1	1	1	3	1	1	1	1	155.0	49.0	70.0	20.3954	114	73	15	4.57	139.44	46.04	0.16	0.09	0.12	赵萍	510703199108023123	103309270036
0	13	2	3	2	2	36	2	2	2	1	1	3	1	1	1	1	150.0	50.2	74.0	22.3111	112	75	15	2.42	\N	1.47	0.18	\N	0.11	杨建	510702197704225420	103311020067
0	14	2	3	2	1	38	2	2	2	1	1	3	1	1	1	1	165.0	65.7	73.0	24.1322	132	84	50	1.23	\N	3.67	0.14	\N	0.1	段正全	510921197507250213	103311030063
0	15	2	3	3	2	47	2	3	2	1	1	3	1	1	1	1	156.0	47.0	66.0	19.313	137	73	23	221.21	1001	1001	2.17	2.81	1.86	赵国碧	510702196508225445	103307310008
0	16	2	3	3	1	33	2	2	1	1	1	3	1	1	1	1	170.0	67.0	75.0	23.1834	122	72	28	1.07	77.91	573.58	0.19	0.12	0.11	杨帮金	510525198001261132	103309200006
0	17	2	3	3	2	16	1	1	1	1	1	3	1	1	1	1	160.0	53.4	70.0	20.8594	109	63	8	26.43	144.21	325.46	0.11	0.09	0.1	郭欢欢	51070319961220314X	103310060024
0	19	2	3	3	2	55	3	3	3	1	2	3	1	1	1	1	145.0	53.0	88.0	25.2081	122	71	22	3.52	281.35	137.76	0.15	0.11	0.1	徐明秀	51070219580205542X	103310040063
0	20	2	3	3	1	16	1	1	1	1	1	3	1	1	1	1	180.0	55.2	60.0	17.037	125	79	30	0.19	197.29	20.61	0.06	0.16	7.35	李栋	510703199707253115	103308160020
0	21	2	3	3	2	40	2	2	2	1	1	3	1	1	1	1	152.0	59.9	80.0	25.9262	119	86	51	3.5	39.32	4.26	0.009	4.14	4.52	刘翠英	510702197307135421	103309020046
0	22	2	3	3	2	29	1	1	1	1	1	3	1	1	1	1	152.0	51.5	74.0	22.2905	120	80	12	8.12	63.96	53.08	0.24	0.3	0.1	周朝燕	513437198311091928	103310150026
0	23	2	3	3	2	54	3	3	3	1	1	3	1	1	1	1	155.0	61.2	78.0	25.4735	140	83	22	0	1001	84.45	0.01	4.75	7.29	刘仁定	513437195906106427	103311070044
0	24	2	3	3	1	16	1	1	1	1	1	3	1	1	1	1	171.0	57.8	78.0	19.7668	99	51	35	28.19	747.2	389.63	0.13	0.07	0.08	李俊杰	510703199701153113	103308050052
0	25	2	3	3	2	28	1	1	1	1	1	3	1	1	1	1	164.0	56.1	70.0	20.8581	121	66	58	3.31	16.79	46.84	0.2	0.11	0.08	李晴	510727198507172747	103308040008
0	26	2	3	3	1	32	2	2	1	1	3	3	3	3	1	1	175.0	81.0	87.0	26.449	130	80	86	1.01	32.4	17.19	0.1	0.05	0.04	周安	510703198106073114	103308020023
0	27	2	3	3	2	49	2	3	2	1	1	3	1	3	1	1	155.0	49.1	74.0	20.437	98	64	33	19.05	11.85	26.65	4.85	4.37	5.21	田玉兰	510702196310105421	103309240025
0	29	2	3	3	2	24	1	1	1	1	2	3	1	1	1	1	156.0	51.2	70.0	21.0388	102	71	20	5.19	1001	232.25	0.15	0.19	0.27	郑晓蓉	510703198907253123	103309270128
0	30	2	3	3	1	37	2	2	2	1	1	3	2	3	1	1	172.0	72.8	86.0	24.6079	147	77	32	0.72	3.57	22.98	0.54	0.7	0.18	刘荣发	510702197608185414	103310200033
0	31	2	3	3	1	44	2	2	2	1	1	3	2	3	1	1	152.0	56.9	80.0	24.6278	120	71	22	9.29	283.29	20.62	0.77	0.84	0.58	洪余银	510702196902155430	103309220059
0	32	2	3	3	2	37	2	2	2	2	1	3	1	1	1	1	152.0	46.8	66.0	20.2562	101	69	35	1.32	27.06	74.51	0.15	0.1	0.08	江利华	510726197510090020	103308150043
0	34	2	3	3	1	18	1	1	1	1	2	3	-1	-1	1	1	170.2	60.5	70.0	20.8851	135	83	23	1.02	424.79	46.15	无	7.49	10.23	谢锐	510703199411063136	103310030001
0	35	2	3	2	2	16	1	1	1	1	1	3	-1	-1	1	1	153.0	50.0	76.0	21.3593	120	71	10	1.93	\N	27.34	0.44	\N	0.1	谢倩倩	510703199703203129	103310290005
0	36	2	3	3	2	19	1	1	1	1	2	3	1	1	1	1	158.0	48.1	70.0	19.2677	105	60	6	2.29	42.91	4.6	2.07	0.33	0.12	胡晓玲	510703199409063129	103310270026
0	37	2	3	3	2	27	1	1	1	1	3	3	1	1	3	3	156.0	50.9	70.0	20.9155	108	70	24	0	1001	625.05	0.005	7.6	7.89	胡利利	510703198603133122	103310270025
0	38	2	3	3	1	32	2	2	1	1	1	3	2	2	1	1	170.0	58.9	72.0	20.3806	130	69	24	43.03	1001	136.07	8.42	7.97	7.6	李涛源	510703198108203111	103311100039
0	40	2	3	3	2	50	3	3	3	1	1	3	1	1	1	1	151.0	54.5	83.0	23.9025	131	81	30	38.76	66.83	116.47	7.08	8.03	6.85	马玉兰	510702196307185424	103308010009
0	41	2	3	3	1	41	2	2	2	1	1	3	1	3	1	1	165.0	70.5	90.0	25.8953	158	110	38	56.88	301.01	67.34	6.47	6.02	5.83	蒋军	510922197203031990	103309200069
0	42	2	3	3	2	27	1	1	1	1	1	3	1	1	1	1	148.0	59.9	78.0	27.3466	101	52	11	0	14.95	9.84	0.2	0.16	0.11	唐静	510703198603213122	103309200071
0	43	2	3	3	2	36	2	2	2	1	1	3	1	1	1	1	150.0	57.3	78.0	25.4667	104	65	25	7.36	293.94	61.87	0.86	1.22	1.87	胡燕	510702197612275420	103308260034
0	45	2	3	3	1	54	3	3	3	1	1	3	1	2	2	2	155.0	56.7	78.0	23.6004	155	91	42	56.92	870.26	294.74	0.35	0.4	0.34	王延银	510702195810225433	103309040009
0	46	2	3	3	2	50	3	3	3	1	3	3	1	1	1	1	155.0	50.4	70.0	20.9781	112	67	69	5.9	13	4.2	0.423	0.36	0.25	谭翠琼	510702196210175422	103308300053
0	47	2	3	2	1	57	3	3	3	1	1	3	1	1	1	1	150.0	51.7	70.0	22.9778	115	72	20	52.9	\N	236.69	0.005	\N	4.58	谢申伯	510702195511205432	103309240185
0	48	2	3	3	2	47	2	3	2	1	1	3	1	1	1	1	160.0	65.8	83.0	25.7031	118	75	27	7.96	27.47	13.46	2.32	3.33	1.75	赖素英	510702196511295428	103309250062
0	49	2	3	3	2	38	2	2	2	1	1	3	1	1	1	1	145.0	47.4	70.0	22.5446	138	70	24	0	0	105.01	1.73	0.09	2.23	周秀苹	510702197502085423	103308080037
0	50	2	3	3	2	48	2	3	2	1	1	3	1	1	1	1	154.0	51.2	68.0	21.5888	118	70	14	23.9	72.5	15.35	0.078	4.2	2.25	魏银芳	510702196409245424	103308220050
0	51	2	3	3	2	39	2	2	2	1	1	3	1	1	2	2	150.0	57.9	76.0	25.7333	146	100	17	0	259.58	257.58	0.982	1.18	0.84	赵宗碧	510702197310105426	103309050021
0	52	2	3	3	2	39	2	2	2	1	1	3	2	1	1	1	156.0	55.4	78.0	22.7646	114	73	11	45.2	307.05	54.96	0.005	5.85	4.59	梁小红	510823197404255043	103309250036
0	53	2	3	3	2	56	3	3	3	1	1	3	1	1	1	1	140.0	46.6	86.0	23.7755	163	76	9	0	388.97	737.77	0.292	2	2	田明华	510702195704145421	103309280088
0	54	2	3	3	2	54	3	3	3	1	1	3	1	1	1	1	150.0	64.7	89.0	28.7556	146	86	33	0	144.52	3.24	1.64	0.09	0.17	唐定碧	510702195812295427	103309160077
0	55	2	3	3	2	38	2	2	2	1	1	3	1	1	1	1	154.0	38.9	89.0	16.4024	103	64	13	63.9	923.51	691.5	0.005	0.04	5.95	刘顺凤	510702197507245529	103308030041
0	57	2	3	3	2	49	2	3	2	1	1	3	1	2	1	1	145.0	52.5	81.0	24.9703	126	80	42	3.5	111.89	139.4	1.8	5.92	5.28	钟盛蓉	510702196406105426	103309280073
0	58	2	3	3	1	57	3	3	3	1	1	3	2	3	1	1	155.0	47.1	78.0	19.6046	138	82	135	0	108.1	29.67	1.76	0.43	0.4	谢申常	510702195510225458	103309240042
0	59	2	3	3	2	51	3	3	3	1	1	3	1	1	1	1	150.0	50.3	71.0	22.3556	122	69	24	75.2	188.84	87.52	1.37	1.33	5.8	杨芳	510702196201205423	103309110012
0	60	2	3	3	1	51	3	3	3	1	1	3	2	3	1	1	166.0	76.1	100.0	27.6165	124	77	34	10	1.5	2.26	0.005	9.95	8.62	李和武	510702196208095415	103309110011
0	61	2	3	3	2	42	2	2	2	1	1	3	1	1	1	1	150.0	44.3	66.0	19.6889	107	71	21	0	24.65	19.37	1.78	9.31	9.06	王申会	510702197108045423	103308280037
0	63	2	3	3	1	52	3	3	3	1	1	3	2	1	1	1	165.0	65.0	85.0	23.8751	131	88	87	32.1	179.63	68.32	0.008	4.3	4.81	舒文金	510702196102165411	103309240043
0	64	2	3	3	2	49	2	3	2	1	1	3	1	1	1	1	152.0	54.0	76.0	23.3726	113	70	14	0	179.14	35.87	1.92	4.07	3.55	余佩琼	510702196310075429	103308160017
0	65	2	3	3	1	58	3	3	3	1	1	3	2	2	1	1	155.0	53.2	78.0	22.1436	158	93	79	0	193.54	11.52	0.005	1.41	1.24	邓从寿	51070219550106543X	103309160123
0	66	2	3	3	1	42	2	2	2	1	1	3	2	2	1	1	161.0	56.8	77.0	21.9127	123	77	98	102.3	1001	1001	0.005	4.89	4.83	贾明先	51070219710117541X	103309280077
0	67	2	3	2	2	57	3	3	3	1	1	3	1	1	2	2	152.0	71.5	90.0	30.947	145	91	42	0	\N	33	1.59	\N	0.16	李玉凤	510702195605275423	103309060049
0	68	2	3	2	2	56	3	3	3	1	1	3	1	1	1	1	155.0	64.8	90.0	26.9719	142	63	50	222	\N	97.97	0.005	\N	4.08	谢秀兰	510702195701195423	103309220052
0	70	2	3	3	2	33	2	2	1	1	1	3	1	1	1	1	152.0	54.7	76.0	23.6756	100	69	23	11.7	152.94	0.76	0.903	8.09	0.13	胡常容	513437198008266422	103310080024
0	71	2	3	3	2	57	3	3	3	1	1	3	1	1	2	2	150.0	50.3	80.0	22.3556	143	82	23	4	94.39	215.31	0.005	8.27	7.04	谢碧英	51070219560810542X	103309040019
0	72	2	3	3	2	44	2	2	2	1	3	3	1	1	1	1	150.0	47.1	67.0	20.9333	121	76	49	0	52.77	78.1	1.94	7.59	7.11	陈晓清	510702196810265421	103307310044
0	73	2	3	3	2	41	2	2	2	1	3	3	1	1	1	1	154.0	49.1	68.0	20.7033	123	79	19	6.4	564.48	32.43	0.005	3.48	3.98	黄春芬	512925197203043829	103310040186
0	74	2	3	1	1	23	1	1	1	1	1	3	2	2	1	1	166.0	63.0	80.6	22.8625	120	78	21	3.7	6.65	\N	0.005	0.05	\N	苏东	510725198911174514	103309020056
0	75	2	3	3	2	46	2	3	2	1	1	3	1	1	1	1	155.0	49.8	72.0	20.7284	118	79	22	63.1	55.87	39.86	0.005	6.72	7.32	刘冬梅	510702196703125423	103309230104
0	77	2	3	2	1	51	3	3	3	1	1	3	2	3	1	1	145.0	59.8	100.0	28.4423	175	96	32	26.9	\N	71.5	0.005	\N	3.65	曾乐金	510702196209275418	103311070014
0	78	2	3	3	1	38	2	2	2	1	1	3	1	1	1	1	166.0	62.0	86.0	22.4996	131	76	68	4.3	3.952	4.17	0.005	10.32	9.14	李奎	510702197504225418	103308060028
0	79	2	3	3	2	38	2	2	2	1	3	3	1	1	1	1	150.0	61.2	82.0	27.2	104	68	22	6.1	23.28	199.48	0.007	9.82	8.43	周秀凤	510702197503145424	103308050058
0	80	2	3	2	2	42	2	2	2	1	1	3	1	1	1	1	150	55.2	75.0	24.5333	125	66	53	2.3	\N	142.62	1.89	\N	0.09	彭小兰	510702197011115421	103309030023
0	81	2	3	3	1	47	2	3	2	1	1	3	2	2	1	1	165.0	71.1	92.0	26.1157	107	62	118	0	1001	303.97	0.005	5.87	5.16	郭诚	510702196608035411	103309030088
0	82	2	3	3	2	48	2	3	2	1	1	3	1	1	1	1	148.0	46.2	70.0	21.092	108	62	49	0	5.57	3.99	1.74	0.07	0.07	孙德琼	510702196503105428	103309170111
0	83	2	3	3	2	36	2	2	2	1	1	3	1	1	1	1	155.0	49.8	70.0	20.7284	121	79	30	0	32.42	4.14	0.005	7.74	6.87	杨元惠	51070219761129542X	103309110001
0	84	2	3	3	2	27	1	1	1	1	1	3	-1	-1	1	1	165.0	60.6	67.0	22.259	104	73	13	0	7.95	433.42	1.55	10.36	0.22	黄艳	510722198606192741	103308200012
0	86	2	3	3	2	46	2	3	2	1	1	3	1	1	1	1	154.0	69.7	100.0	29.3894	119	74	17	0	37.29	1001	1.73	9.86	1.81	凌琼兰	510702196704275423	103308100041
0	87	2	3	3	2	38	2	2	2	1	1	3	1	2	1	1	155.0	57.0	80.0	23.7253	108	75	17	9.7	45.19	106.5	0.005	8.67	7.66	米英	510702197506075521	103309230039
0	88	2	3	3	1	49	2	3	2	1	1	3	-1	-1	1	1	158.0	57.9	80.0	23.1934	125	80	22	11.3	1001	983.11	0.006	0.09	4.81	周尚玉	510702196409055516	103311140003
0	89	2	3	3	2	41	2	2	2	1	1	3	1	1	1	1	160.0	60.2	84.0	23.5156	122	70	18	150.6	1001	657.17	1.7	0.14	0.13	马秀英	510702197204095420	103309240027
0	90	2	3	3	2	48	2	3	2	1	1	3	1	2	1	1	154.0	62.3	86.0	26.2692	124	74	77	0	10.08	23.86	1.58	0.11	0.18	张蓉	510702196409235429	103308100025
0	91	2	3	3	1	24	1	1	1	1	3	3	-1	-1	1	1	164.0	48.1	62.0	17.8837	125	64	40	37.2	1001	1001	0.005	8.81	8.59	何章	51070319890409311X	103307310047
0	92	2	3	3	2	51	3	3	3	1	1	3	1	1	1	1	150.0	59.2	78.0	26.3111	120	74	43	15.9	572.1	48.92	1.94	0.88	0.78	谢丽华	51070219620422542X	103308300010
0	93	2	3	3	1	42	2	2	2	1	1	3	2	3	1	1	170.0	62.5	80.0	21.6263	117	84	48	244.4	1001	1001	1.91	1.56	0.94	周斌	51070219710301541X	103311080017
0	94	2	3	3	2	41	2	2	2	1	1	3	-1	-1	1	1	158.0	62.7	84.0	25.1162	112	72	23	812.1	210.36	385.39	0.006	0.19	4.68	谢世群	511028197209167047	103310160002
0	95	2	3	3	1	39	2	2	2	1	1	3	-1	-1	1	1	165.0	51.9	68.0	19.0634	111	74	20	56	1001	150.48	1.84	4.9	6.56	李小军	510702197408215412	103309030029
0	96	2	3	3	2	45	2	3	2	1	1	3	-1	-1	2	2	158.0	62.2	82.0	24.9159	188	113	8	0	322.7	224.39	1.96	0.34	0.34	肖青秀	510702196804115523	103311020055
0	97	2	3	3	2	26	1	1	1	1	1	3	-1	-1	1	1	163.0	53.4	74.0	20.0986	116	57	4	0	396.74	5.01	0.848	10.13	7.76	魏杨荭	510724198611232448	103311030065
0	99	2	3	3	2	37	2	2	2	1	1	3	-1	-1	1	1	152.0	63.3	86.0	27.3979	126	67	16	0	7.34	1.31	1.77	0.43	0.13	蒋琼英	510702197601215529	103311020010
0	100	2	3	3	1	54	3	3	3	1	1	3	2	3	1	1	155.0	55.3	76.0	23.0177	132	73	64	0	311.06	265.39	0.005	5.08	4.99	吴代金	510702195810085418	103309050034
0	101	2	3	3	2	42	2	2	2	1	1	3	1	1	1	1	157.0	59.3	80.0	24.0578	112	70	13	0	31.31	17.6	1.79	0.15	0.14	李凤铭	510702197105015421	103309170073
0	102	2	3	3	1	45	2	3	2	1	1	3	1	1	1	1	174.0	81.6	96.0	26.952	121	79	27	0	785.49	173.75	2.01	1.46	1.91	王德斌	510726196710292837	103310070016
0	103	2	3	3	2	41	2	2	2	1	1	3	1	1	1	1	153.0	66.2	88.0	28.2797	131	81	19	45.2	1001	50.84	1.89	4.53	4.14	王英	510702197206055529	103310050040
0	104	2	3	3	2	17	1	1	1	1	1	3	-1	-1	1	1	173.0	59.0	72.0	19.7133	120	77	11	0	1001	959.92	1.82	0.19	7.31	卓华芬	522321199606282827	103310060013
0	106	2	3	3	2	48	2	3	2	1	1	3	-1	-1	1	1	155.0	56.5	76.0	23.5172	142	81	13	69.3	0	89.09	0.005	3.11	2.47	郭晓蓉	510702196509295525	103311020035
0	107	2	3	3	2	43	2	2	2	1	1	3	-1	-1	1	1	155.0	62.7	86.0	26.0978	148	84	10	124.4	245.16	29.09	1.84	8.4	7.52	王用美	510702197006125529	103311030011
0	108	2	3	3	2	48	2	3	2	1	1	3	1	1	1	1	150.0	45.5	75.0	20.2222	112	80	57	4.7	453.41	44.39	2.05	7.51	7	李玉琼	510702196411045421	103309200047
0	109	2	3	3	1	50	3	3	3	1	1	3	3	3	1	1	165.0	66.5	88.0	24.4261	89	72	32	8.8	1001	189.26	1.9	0.3	0.12	程应全	510702196305145410	103309200046
0	110	2	3	3	1	46	2	3	2	1	1	3	2	3	1	1	155.0	49.8	77.0	20.7284	103	70	19	3	16.73	3.54	1.8	0.07	0.1	黄云坤	510702196612155416	103309170006
0	111	2	3	3	1	50	3	3	3	1	1	3	2	3	1	1	165.0	71.5	90.0	26.2626	140	92	31	75.2	250.53	76.35	1.37	0.23	0.17	周季春	510702196304155414	103308020033
0	112	2	3	3	1	52	3	3	3	1	2	3	2	2	1	1	170.0	65.1	80.0	22.526	115	80	149	0	50.97	52.49	1.78	4.42	4.13	赵德成	510702196107285455	103309250004
0	113	2	3	3	2	23	1	1	1	1	2	3	1	1	1	1	155.0	48.0	68.0	19.9792	125	74	14	0	1.85	678.51	1.92	0.14	0.6	杨佳佳	510703199005213127	103310040130
0	114	2	3	3	2	42	2	2	2	1	1	3	1	1	1	1	150.0	58.8	86.0	26.1333	120	73	72	561.1	1001	598.99	0.005	8.09	7.57	曾方玉	510702197102095024	103310040131
0	115	2	3	3	1	44	2	2	2	1	1	3	2	3	1	1	162.0	77.7	95.0	29.6068	154	109	196	8.4	1001	108.92	0.035	2.87	2.27	谢正地	510702196904205411	103309230021
0	116	2	3	3	1	30	2	2	1	1	3	3	-1	-1	1	1	166.0	63.7	80.0	23.1166	125	77	26	0	17.49	10.69	1.92	0.09	0.12	范金	510703198210293117	103308010083
0	118	2	3	3	2	43	2	2	2	1	1	3	-1	-1	1	1	155.0	53.5	76.0	22.2685	151	86	25	15.7	1001	256.37	1.78	5.94	4.24	周春兰	510702197001195421	103312210020
0	119	2	3	3	1	42	2	2	2	1	1	3	1	3	1	1	170.0	63.9	78.0	22.1107	106	72	10	10	63.69	26.41	0.005	7.35	5.94	李宏	51070219701007543X	103309110004
0	120	2	3	3	2	33	2	2	1	1	3	3	1	1	1	1	152.0	49.5	66.0	21.4249	113	82	15	0	5.19	32.49	1.9	0.19		周晓丽	510703198002053127	103310040114
0	121	2	3	3	1	24	1	1	1	1	1	3	2	2	1	1	170.0	55.5	70.0	19.2042	118	81	32	280.9	1001	1001	0.005	0.17	0.15	钟健	510703198908083111	103310110017
0	123	2	3	3	2	46	2	3	2	1	1	3	1	1	1	1	160.0	59.9	80.0	23.3984	125	86	26	0	27.91	77.54	1.96	7.15	6.59	周翠云	510702196611035420	103309110086
0	124	2	3	3	2	29	1	1	1	1	3	3	-1	-1	1	1	161.0	55.0	66.0	21.2183	120	69	14	0	1001	95.09	1.85	0.39	0.21	王丹丹	510703198402282623	103310270029
0	126	2	3	3	2	51	3	3	3	1	1	3	1	1	1	1	145.0	61.2	98.0	29.1082	171	94	24	0	421.86	86.25	1.88	0.4	0.1	王汝琼	510702196208055528	103311030051
0	127	2	3	3	2	51	3	3	3	1	1	3	-1	-1	1	1	152.0	53.0	78.0	22.9398	144	86	16	296.6	121.93	75.94	0.005	9.06	8.64	纪玉琼	510702196207185523	103310300015
0	128	2	3	3	2	51	3	3	3	1	1	3	1	1	1	1	158.0	59.2	85.0	23.7141	136	85	51	0	38.42	15.09	1.86	0.11	0.13	罗兴凤	510702196208025425	103309160072
0	129	2	3	3	2	51	3	3	3	1	1	3	1	1	1	1	155.0	54.8	73.0	22.8096	121	89	16	0	234.09	394.8	1.94	4.76	4.23	赵宗英	510702196206065423	103309030028
0	130	2	3	3	2	54	3	3	3	1	1	3	1	1	1	1	130.0	38.5	78.0	22.7811	129	69	29	1.36	6.51	2.69	8.08	9.45	8.51	赖素华	510702195905145428	103309110058
0	131	2	3	3	2	18	1	1	1	1	1	3	-1	-1	1	1	150.0	44.0	63.0	19.5556	113	74	5	2.3	419.78	106.91	1.64	0.14	0.11	李柯欣	510703199412093126	103310050053
0	132	2	3	1	2	40	2	2	2	1	3	3	1	1	1	1	164.0	54.3	70.0	20.1889	123	77	62	0.89	156.31	\N	4.41	3.88	\N	郭述兰	510702197212055445	103308010069
0	135	2	3	3	2	31	2	2	1	1	1	3	1	2	1	1	161.0	55.4	70.0	21.3726	120	87	24	7.69	115.1	99.52	0.41	0.302	0.3	欧蓉	510623198203077926	103308220030
0	137	2	3	3	2	26	1	1	1	1	1	3	1	1	1	1	160.0	57.2	72.0	22.3437	114	76	19	6.1	56.06	29.34	0.005	9.21	7.89	董晓丽	510703198708253286	103310060025
0	138	2	3	3	2	38	2	2	2	1	1	3	1	1	1	1	160.0	69.0	81.0	26.9531	122	72	10	83.6	930.36	374.64	0.007	2.57	7.16	谢春燕	510702197505205427	103310270031
0	139	2	3	3	1	56	3	3	3	1	1	3	2	1	1	1	155.0	62.5	90.0	26.0146	139	76	51	35.2	40.59	44.95	1.69	0.08	0.1	刘兴科	510702195612215410	103310040123
0	140	2	3	3	2	57	3	3	3	1	1	3	1	1	1	1	160.0	60.6	74.0	23.6719	116	83	74	4.44	1001	34.3	6.79	7.66	7.41	李成静	510702195602115424	103309030035
0	142	2	3	3	1	51	3	3	3	1	1	3	2	3	2	2	155.0	64.1	82.0	26.6805	149	101	33	4.4	4.31	6.51	2.8	4.28	2.28	李正伦	510702196208125418	103309220031
0	144	2	3	3	2	50	3	3	3	1	1	3	1	1	2	2	145.0	57.2	80.0	27.2057	152	90	169	6.12	880.24	15.73	7.83	7.73	7.34	余琼珍	510702196209125428	103308280054
0	145	2	3	3	2	55	3	3	3	1	1	3	1	1	1	1	150.0	64.7	88.0	28.7556	132	70	23	4.7	1.33	161.43	0.667	1.07	0.98	林琼华	510702195804195426	103309040021
0	146	2	3	3	1	55	3	3	3	1	1	3	1	2	1	1	164.0	56.1	72.0	20.8581	109	72	142	1.48	2.22	30.41	5.47	4.65	4.73	谢申太	510702195803195416	103309020010
0	147	2	3	2	1	36	2	2	2	1	1	3	1	1	1	1	156.0	69.4	92.0	28.5174	135	84	66	120.19	\N	413.48	9.56	\N	9.27	谢勇	510702197701095413	103309300065
0	148	2	3	3	1	42	2	2	2	1	1	3	2	2	1	1	160.0	66.2	81.0	25.8594	134	88	25	3	114.28	5.62	0.006	5.57	4.52	雷斌	510702197101075435	103311070021
0	150	2	3	3	2	51	3	3	3	1	1	3	1	1	1	1	154.0	69.1	90.0	29.1364	123	77	38	115.19	1001	188.52	4.84	4.41	3.36	郭凤珍	510702196206265425	103309060080
0	151	2	3	3	1	57	3	3	3	1	1	3	2	1	1	1	155.0	60.0	82.0	24.974	134	82	48	1.63	0.82	93.74	4.5	4.7	0.16	何远贵	510702195606215414	103309230101
0	152	2	3	3	2	57	3	3	3	1	1	3	1	1	1	1	155.0	59.6	80.0	24.8075	124	82	23	11.84	65.16	29.66	4.41	4.76	4.21	付桂英	510702195604065424	103309230100
0	153	2	3	3	2	36	2	2	2	1	1	3	1	1	1	1	150.0	45.2	70.0	20.0889	99	58	10	64.63	867.25	1001	2.39	4.7	2.46	谢家燕	51060219761013512X	103309130032
0	154	2	3	3	1	28	1	1	1	1	1	3	2	1	1	1	172.0	76.7	89.0	25.9262	133	77	47	14.1	1001	136.45	5.69	6.38	6.27	郭明健	510703198501103117	103308290095
0	155	2	3	2	2	44	2	2	2	1	1	3	1	1	1	1	155.0	54.4	77.0	22.6431	125	78	22	32.52	\N	1001	0.47	\N	0.23	邓先英	510702196811215522	103309200004
0	157	2	3	3	1	23	1	1	1	1	1	3	1	1	1	1	165.0	48.7	72.0	17.888	113	73	24	92.17	642.63	355.67	0.35	0.25	0.26	崔平	510703198912053118	103309200003
0	158	2	3	2	1	26	1	1	1	1	1	3	1	1	1	1	170.0	65.0	70.0	22.4913	146	78	26	1	\N	5.22	0.26	\N	0.24	李尚清	510703198705053115	103312220005
0	160	2	3	3	1	48	2	3	2	1	1	3	2	3	1	1	152.0	50.5	77.0	21.8577	134	80	74	3.7	78.11	18.16	0.007	4.53	3.86	赖顺儒	510702196502275433	103308030084
0	161	2	3	2	1	37	2	2	2	1	1	3	-1	-1	1	1	170.0	57.0	76.0	19.7232	132	89	13	27.05	\N	45.64	8.63	\N	7.77	周尚斌	510702197511155518	103311080019
0	162	2	3	3	1	46	2	3	2	1	1	3	1	2	2	2	160.0	63.7	83.0	24.8828	176	100	46	6.5	137.22	31.74	0.575	1.32	1.2	赖成保	510702196708035419	103309260104
0	163	2	3	3	2	51	3	3	3	1	1	3	1	1	1	1	150.0	61.5	85.0	27.3333	125	64	23	5.87	7.84	3	6.59	7.3	5.28	顾翠莲	510702196111255427	103309250042
0	164	2	3	3	2	30	2	2	1	1	1	3	-1	-1	1	1	165.0	76.5	90.0	28.0992	126	83	23	31.66	477	86.92	4.73	5.66	7.09	邓丽萍	510722198305127364	103311040043
0	165	2	3	3	1	30	2	2	1	1	2	3	-1	-1	1	1	155.0	55.6	76.0	23.1426	137	96	63	85.82	901.08	281.5	6.41	7.63	8.05	周斌	510703198212173119	103311040044
0	167	2	3	3	1	52	3	3	3	1	1	3	2	1	1	1	170.0	62.3	82.0	21.5571	111	78	33	14.3	67	28.78	0.005	9.44	8.77	廖绪光	510702196103295410	103309210027
0	168	2	3	3	2	42	2	2	2	1	1	3	-1	-1	1	1	152.0	46.6	72.0	20.1697	106	76	6	83.4	1001	1001	5.93	6.9	5.68	何会蓉	510702197109015541	103311020054
0	170	2	3	3	2	28	1	1	1	1	1	3	1	1	1	1	162.0	55.6	68.0	21.1858	125	66	11	0	28.67	0.24	1.76	0.09	0.14	崔兴红	510703198502173125	103309200011
0	171	2	3	2	2	34	2	2	1	1	1	3	-1	-1	1	1	156.0	43.3	66.0	17.7926	127	73	22	12.23	\N	1001	无	\N	3.03	郭洪英	510703197904023125	103311080020
0	172	2	3	2	1	40	2	2	2	1	3	3	2	3	1	1	165.0	65.3	82.0	23.9853	138	85	26	2.34	\N	165.17	0.08	\N	0.14	谢申林	510702197305175438	103309250009
0	173	2	3	3	2	46	2	3	2	1	1	3	1	1	1	1	145.0	51.5	84.0	24.4946	94	56	14	14.36	156.38	130.78	3.7	6.51	6.05	毛秀琼	51070219670112542X	103309240080
0	174	2	3	3	2	47	2	3	2	1	1	3	1	1	1	1	150.0	48.0	71.0	21.3333	110	68	22	15.59	230.27	167.41	0.13	0.09	0.1	李本凤	510702196604065429	103309240172
0	175	2	3	3	1	49	2	3	2	1	2	3	2	3	1	1	167.0	56.7	81.0	20.3306	127	82	104	25.7	45.92	13.98	0.005	8.91	8.7	罗曙光	510702196408155419	103309240173
0	177	2	3	3	2	52	3	3	3	1	1	3	1	1	1	1	155.0	52.9	80.0	22.0187	133	74	169	12.77	691.07	21.83	0.39	0.31	0.15	郭秀祝	510702196101235422	103309020064
0	178	2	3	3	2	28	1	1	1	1	1	3	1	1	1	1	160.0	73.8	70.0	28.8281	130	82	29	21.1	115.41	1001	0.006	7.89	0.43	何春梅	51070319850208312X	103310040084
0	179	2	3	3	1	52	3	3	3	1	1	3	2	2	1	1	162.0	70.2	88.0	26.749	162	90	43	36.98	165.53	101.44	2.06	1.95	1.77	何远明	510702196010285416	103309030060
0	181	2	3	3	2	58	3	3	3	1	1	3	1	1	1	1	148.0	59.5	83.0	27.164	133	66	21	29.79	498.08	6.29	7.89	7.85	4.59	曾玉琼	510702195503045424	103309030011
0	182	2	3	1	1	56	3	3	3	1	1	3	2	3	1	1	164.0	50.1	75.0	18.6273	117	73	16	82.3	262.19	\N	3.24	3.72	\N	何远跃	522627195707110019	103309030012
0	183	2	3	3	1	42	2	2	2	1	1	3	1	2	1	1	169.0	70.0	89.0	24.5089	138	89	39	1.84	1.66	1.22	7.97	9.77	8.44	杨国林	510702197106265430	103308150039
0	184	2	3	3	2	24	1	1	1	1	1	3	1	1	1	1	152.0	43.5	70.0	18.8279	117	80	13	8.25	430.81	1.63	0.22	0.2	5.48	周秀	510703198906033129	103309270132
0	185	2	3	3	2	47	2	3	2	1	1	3	1	1	1	1	167.0	51.8	78.0	18.5736	141	97	24	0	659.7	330.88	0.16	0.95	0.49	洪玉琼	510702196608265428	103309040127
0	187	2	3	3	2	41	2	2	2	1	1	3	1	1	1	1	150.0	57.7	80.0	25.6444	101	59	16	>1000	17.8	17.25	3.8	6.43	6.42	王琼华	510702197201205540	103308300073
0	188	2	3	3	1	42	2	2	2	1	1	3	1	2	1	1	170.0	66.4	85.0	22.9758	95	55	38	120.62	1001	1001	8.57	8.56	7.82	郭永龙	510702197101025411	103309120043
0	190	2	3	3	2	50	3	3	3	1	1	3	1	1	1	1	155.0	58.4	80.0	24.308	110	65	13	23.48	46.66	17.57	4.17	3.76	3.01	马素琼	510702196304225427	103309280117
0	191	2	3	3	2	48	2	3	2	1	1	3	1	1	1	1	155.0	62.5	83.0	26.0146	116	82	22	13.9	108.64	21.17	8.91	9.14	8.67	唐蓉	51070219650525542X	103309180103
0	193	2	3	3	2	32	2	2	1	1	1	3	-1	-1	1	1	150.0	44.4	62.0	19.7333	122	72	11	148.19	1001	17.5	7.7	7.52	4.34	李玉红	510703198102023128	103308260072
0	194	2	3	3	1	56	3	3	3	1	2	3	1	1	1	1	155.0	55.2	68.0	22.9761	113	87	23	>1000	78.1	35.58	8.36	9.27	8.51	刘代清	51070219570812541X	103309230096
0	195	2	3	3	2	58	3	3	3	1	1	3	1	1	1	1	150.0	90.6	123.0	40.2667	164	93	19	18.3	10.39	7.77	0.005	9.59	8.49	黄秀珍	510702195507065449	103309160070
0	198	2	3	2	1	49	2	3	2	1	1	3	-1	-1	1	1	168.0	76.2	100.0	26.9983	165	89	22	24.29	\N	37.21	8.94	\N	8.17	陈建军	510702196312255415	103311190015
0	201	2	3	3	1	48	2	3	2	1	1	3	1	1	1	1	155.0	58.1	79.0	24.1831	115	79	50	19.58	158.45	16.24	9.63	9.99	9.56	陈光辉	51070219650905545X	103309100079
0	202	2	3	3	2	45	2	3	2	1	1	3	1	2	1	1	155.0	68.0	90.0	28.3039	121	80	91	13.7	1001	49.33	1.02	0.34	0.78	杨世英	510702196808115424	103309270078
0	203	2	3	3	2	43	2	2	2	1	1	3	1	1	1	1	160.0	51.1	74.0	19.9609	107	66	19	66.54	302.38	249.48	6.33	6.53	6.84	李碧珍	510702197007275449	103309220017
0	204	2	3	3	2	59	3	3	3	1	1	3	-1	-1	1	1	150.0	59.6	86.0	26.4889	134	80	12	7.8	16.88	19.96	0.005	7.74	6.97	张琼芳	510702195402065522	103311030055
0	205	2	3	3	2	50	3	3	3	1	1	3	1	1	1	1	155.0	52.4	74.0	21.8106	128	72	29	5.7	87.04	85.08	0.005	0.29	9.03	周奠凤	510702196307185440	103309230016
0	207	2	3	3	2	39	2	2	2	1	1	3	1	1	1	1	152.0	47.9	60.0	20.7323	109	61	15	2.73	397.9	16.25	3.26	3.16	9.42	谢术琼	510702197404285421	103309170109
0	208	2	3	3	2	47	2	3	2	1	1	3	1	1	1	1	155.0	54.4	70.0	22.6431	138	95	25	0	28.63	11.52	1.67	0.26	0.28	谢秀明	510702196509135425	103308130044
0	209	2	3	3	2	45	2	3	2	1	1	3	1	1	1	1	160.0	54.4	82.0	21.25	116	75	60	82.81	149.47	426.54	7.02	7.4	0.25	马成容	510702196807266423	103309090038
0	210	2	3	3	1	30	2	2	1	1	1	3	1	1	1	1	163.0	43.9	68.0	16.523	110	69	32	0.06	1001	738.94	0.17	0.11	0.06	刘刚	510703198301013117	103309060037
0	211	2	3	3	2	16	1	1	1	1	2	3	1	1	1	1	158.0	53.4	66.0	21.3908	117	73	15	0	134.33	46.15	0.12	0.61	0.05	郭晓凤	510703199704083122	103310270034
0	212	2	3	3	2	32	2	2	1	1	1	3	-1	-1	1	1	161.0	54.3	74.0	20.9483	125	79	26	62.56	196.17	5.09	6.78	6.01	7.19	李开春	510703198103072626	103309280091
0	215	2	3	3	1	58	3	3	3	1	1	3	1	1	1	1	160.0	63.9	87.0	24.9609	148	90	93	0	0.17	0	10.86	10.91	0.19	杨世武	510702195502175411	103309280112
0	217	2	3	3	2	43	2	2	2	1	1	3	1	1	1	1	150.0	57.9	76.0	25.7333	109	49	19	17.26	114.65	250.05	9.51	10.5	1.54	李春香	510623197007111942	103309230133
0	218	2	3	3	1	47	2	3	2	1	1	3	2	1	1	1	157.0	59.4	80.0	24.0983	127	74	20	19.95	179.13	118.58	1.77	2.12	1.9	邓从全	510702196602195414	103310050007
0	219	2	3	3	2	47	2	3	2	1	3	3	1	1	1	1	158.0	63.8	76.0	25.5568	119	92	29	2.58	49	7.58	5.93	7.64	6.4	李清华	510702196606145422	103307310056
0	221	2	3	3	2	58	3	3	3	1	1	3	1	1	1	1	154.0	62.5	80.0	26.3535	169	111	54	6.83	9.88	22.13	0.18	0.2	0.14	曾全惠	510702195506085421	103312220009
0	223	2	3	3	1	34	2	2	1	1	1	3	2	3	1	1	168.0	69.7	91.0	24.6953	128	75	50	15.06	1001	778.55	0.53	0.48	0.49	谢积刚	510703197902193112	103309260169
0	224	2	3	3	1	55	3	3	3	1	1	3	1	1	1	1	155.0	56.6	80.0	23.5588	140	81	25	16.7	18.94	26.35	0.005	8.92	8.51	赵学敏	510702195709115416	103308030092
0	225	2	3	3	1	51	3	3	3	1	1	3	2	2	1	1	160.0	61.4	80.0	23.9844	149	80	20	20.9	1001	341.9	2.39	2.44	4.39	谢家严	510702196207105415	103312230015
0	229	2	3	3	1	43	2	2	2	1	1	3	2	2	1	1	165.0	72.2	88.0	26.5197	139	92	20	3.7	95.04	76.43	0.009	4.18	3.7	粟丰林	510702196912125438	103311060026
0	230	2	3	3	1	57	3	3	3	1	1	3	-1	-1	2	2	165.0	56.8	72.0	20.8632	161	102	115	0.52	26.74	19.35	4.02	3.4	3.3	李玉旭	510702195609255438	103309270160
0	233	2	3	3	2	29	1	1	1	1	1	3	-1	-1	1	1	160.0	49.8	74.0	19.4531	126	93	13	16.51	470.47	74.89	2.78	0.09	2.61	谢燕	510703198311263128	103310300045
0	234	2	3	3	1	50	3	3	3	1	1	3	2	3	1	1	155.0	73.6	98.0	30.6348	132	82	7	15.49	33.2	15.18	4.56	0.11	3.69	赖成华	510702196305165438	103309240005
0	238	2	3	3	2	44	2	2	2	1	1	3	1	1	1	1	155.0	61.5	78.0	25.5983	149	94	54	36.17	460.28	258.93	1.38	1.16	5.02	胡用兰	510702196809125421	103309020029
0	240	2	3	1	2	42	2	2	2	2	1	3	1	1	1	1	155.0	59.9	76.0	24.9324	122	72	9	5.35	27.89	\N	6.3	7.76	\N	魏国琼	510726197102051823	103310240041
0	242	2	3	3	2	48	2	3	2	1	1	3	1	1	1	1	146.0	50.7	72.0	23.785	109	47	12	2.01	56.08	2.55	3.7	2.87	3.19	谢秀芳	510702196501035446	103308300065
0	244	2	3	3	2	41	2	2	2	1	1	3	1	1	1	1	145.0	48.0	76.0	22.83	114	75	164	1.56	1.39	0.08	6.63	9.29	8.63	黄秀华	510602197204085489	103310090021
0	248	2	3	2	2	33	2	2	1	1	1	3	1	1	1	1	162.0	54.0	76.0	20.5761	108	66	15	13.7	\N	894.42	5.83	\N	4.32	赵紫红	510703198009023123	103312180009
0	249	2	3	3	1	55	3	3	3	1	1	3	2	3	1	1	155.0	55.8	84.0	23.2258	132	89	35	0.8	15.07	134.54	0.25	10.11	9.12	郭永恩	510702195710155415	103309020074
0	250	2	3	3	2	55	3	3	3	1	1	3	1	1	2	2	146.0	57.8	83.0	27.1158	165	98	33	73.51	32.86	63.96	9.26	9.16	9.23	周安会	510702195711215424	103309020075
0	251	2	3	3	1	41	2	2	2	1	2	3	1	1	1	1	155.0	71.1	89.0	29.5942	136	120	48	1.32	5.17	29.66	8.89	9.16	5.37	刘勇	510702197205225418	103311060062
0	255	2	3	3	1	42	2	2	2	1	1	3	1	1	1	1	170.0	59.8	81.0	20.692	125	66	17	21.81	1001	1001	5.13	2.28	1.08	谢龙	510702197105055415	103309030084
0	256	2	3	3	2	44	2	2	2	1	1	3	1	1	1	1	160.0	53.3	82.0	20.8203	179	113	62	18.6	49.75	9.29	5.15	4.65	4.84	李维秀	510602196808144449	103308140055
0	258	2	3	3	2	45	2	3	2	1	1	3	1	1	1	1	155.0	66.0	80.0	27.4714	136	84	17	4.84	245.96	89.74	4.87	1.69	4.43	米运秀	510702196803055426	103312200008
0	259	2	3	3	1	50	3	3	3	1	1	3	1	1	1	1	174.0	72.0	84.0	23.7812	105	74	47	12.21	610.44	200.09	0.23	1.9	5.06	郭义	510702196307115418	103309020066
0	260	2	3	3	2	56	3	3	3	1	1	3	1	1	1	1	145.0	60.8	78.0	28.918	150	86	15	7.28	87.57	118.32	1.67	1.83	1.64	谢碧琼	510702195703255426	103310040081
0	261	2	3	2	1	42	2	2	2	1	1	3	-1	-1	1	1	166.0	64.5	76.0	23.4069	159	96	25	0	\N	1001	0.727	\N	0.69	王燕	510702197102265417	103311170014
0	262	2	3	3	1	51	3	3	3	1	1	3	2	3	1	1	160.0	64.8	90.6	25.3125	171	92	20	2.27	0.63	2.16	8.54	70.78	9.99	赵宗友	510702196207035410	103309270074
0	263	2	3	3	2	47	2	3	2	2	1	3	1	1	2	2	162.0	81.7	96.0	31.1309	123	63	15	48.3	0.5	85.58	0.23	9.49	0.09	何秀英	510702196608115462	103311210001
0	264	2	3	3	2	44	2	2	2	1	1	3	1	1	1	1	156.0	50.0	74.0	20.5457	136	84	27	0	5.38	9.28	0.005	7.65	7.7	谢志英	510702196812105421	103309030007
0	265	2	3	2	1	41	2	2	2	1	3	3	2	3	1	1	161.0	61.1	80.0	23.5716	123	85	22	4.76	\N	5.31	5.5	\N	7.73	谢纯燕	510702197112105417	103308130019
0	266	2	3	3	1	46	2	3	2	1	1	3	2	2	1	1	165.0	69.1	87.0	25.3811	128	77	26	248.63	648.77	387.56	3.05	4.92	3.54	谢军	510702196704145434	103309050046
0	267	2	3	3	2	42	2	2	2	1	1	3	1	1	1	1	146.0	50.5	76.0	23.6911	114	71	17	13.31	26.29	613.55	2.12	2.71	1.69	王小华	51062319710423432X	103309050045
0	268	2	3	3	1	47	2	3	2	1	1	3	2	2	1	1	168.0	73.8	86.0	26.148	142	94	24	42.34	225	108.92	0.55	0.53	0.39	何勇	51070219651003543X	103309090033
0	269	2	3	3	2	48	2	3	2	1	1	3	1	1	1	1	155.0	69.6	84.0	28.9698	112	63	87	545.52	556.77	630.22	3.09	0.08	3.21	谢琼茹	510702196507175423	103309090034
0	271	2	3	2	2	40	2	2	2	1	1	3	1	1	1	1	152.0	55.3	76.0	23.9352	109	71	32	23.94	\N	49.52	4.69	\N	4.72	鲜玉	51072719730815084X	103309180031
0	272	2	3	3	2	47	2	3	2	1	1	3	1	1	2	2	158.0	61.6	80.0	24.6755	167	102	32	0	19.27	1001	1.67	0.17	0.13	谢龙英	510702196605295429	103309040120
0	273	2	3	3	2	48	2	3	2	1	1	3	1	1	1	1	150.0	85.0	100.0	37.7778	175	101	30	2.48	7.81	1.71	6.45	8.02	7.99	刘秀琼	510702196411105543	103311020037
0	274	2	3	3	1	47	2	3	2	1	1	3	-1	-1	1	1	155.0	62.5	84.0	26.0146	132	82	19	18.92	913.06	313.69	6.93	6.68	6.55	王用卫	510702196512165510	103311010025
0	275	2	3	3	1	44	2	2	2	1	1	3	2	3	1	1	160.0	49.9	74.0	19.4922	119	78	15	28.16	408.99	84	1.38	1.79	1.74	邓益全	51070219690301543X	103312250002
0	276	2	3	3	2	58	3	3	3	1	1	3	1	1	1	1	150.0	50.0	81.0	22.2222	153	91	25	2.84	176.72	34.41	3.5	4.14	2.1	曾桂琼	510702195410275423	103309030074
0	278	2	3	3	2	56	3	3	3	1	1	3	1	1	1	1	145.0	63.1	93.0	30.0119	146	85	20	0	1.66	1.93	0.13	0.16	0.12	程世兰	510702195611095429	103308190010
0	279	2	3	3	1	49	2	3	2	1	1	3	2	3	1	1	153.0	69.9	93.0	29.8603	132	81	43	0	5.56	1001	0.12	0.18	6.45	谢文国	510702196310055436	103308100009
0	280	2	3	2	2	39	2	2	2	1	1	3	1	1	1	1	152.0	53.2	78.0	23.0263	112	70	90	0	\N	0.3	1.7	\N	0.28	唐志会	510721197311064389	103310220055
0	281	2	3	3	1	58	3	3	3	1	1	3	2	1	1	1	154.0	52.8	77.0	22.2635	127	80	28	158.6	346.28	51.71	0.005	6.76	5.65	赵宗义	510702195503155412	103309260097
0	282	2	3	2	2	55	3	3	3	1	1	3	1	1	1	1	142.0	45.0	76.0	22.317	161	76	35	4.75	\N	16.99	9.37	\N	9.24	李素琼	510702195712305421	103309060076
0	283	2	3	2	1	27	1	1	1	1	1	3	2	1	1	1	166.0	100.3	105.0	36.3986	143	86	73	4.67	\N	25.9	5.15	\N	4.54	李刚	510703198603163137	103309240178
0	284	2	3	3	2	50	3	3	3	1	1	3	1	1	1	1	155.0	58.2	84.0	24.2248	115	80	81	1.41	28.88	137.64	8.07	9.45	8.44	唐福会	510702196304115447	103309100044
0	285	2	3	2	2	38	2	2	2	2	1	3	1	1	1	1	156.0	59.5	72.0	24.4494	108	43	11	0	\N	6.31	1.87	\N	0.08	冯志秀	51072619750418264X	103308200045
0	286	2	3	3	2	39	2	2	2	1	1	3	1	1	1	1	152.0	42.8	62.0	18.5249	136	92	13	0.13	40.78	166.32	7.33	7.47	0.51	徐明英	510702197309265027	103308230050
0	287	2	3	3	1	15	1	1	1	1	1	3	-1	-1	1	1	165.0	50.4	64.0	18.5124	100	55	9	6.021	587.84	35.9	0.36	0.09	7.55	李沁	510703199807213110	103309200129
0	288	2	3	3	2	48	2	3	2	1	1	3	-1	-1	1	1	153.0	50.2	66.5	21.4447	110	70	39	0	122.44	676.08	1.8	0.29	0.16	杨述琼	51060219641115514X	103308020036
0	289	2	3	2	2	37	2	2	2	1	1	3	1	1	1	1	151.0	54.5	76.0	23.9025	95	62	18	1.68	\N	5.29	0.11	\N	0.1	王东兰	510702197511255025	103309100056
0	290	2	3	3	2	36	2	2	2	1	1	3	-1	-1	1	1	158.0	48.4	70.0	19.3879	92	64	40	8.4	388.2	135.46	0.571	0.94	0.5	王霞	510726197708160223	103309030059
0	291	2	3	3	2	52	3	3	3	1	1	3	1	1	1	1	158.0	62.0	85.0	24.8358	140	91	159	7.2	205.29	16.25	0.005	1.16	9.42	唐定春	510702196102045428	103309160109
0	292	2	3	3	1	47	2	3	2	1	1	3	2	2	1	1	160.0	65.1	81.0	25.4297	131	79	45	11.05	372.15	15.89	5.23	6.31	9.94	赵学古	51070219660524543X	103309260069
0	293	2	3	3	2	47	2	3	2	1	1	3	1	3	1	1	152.0	54.3	74.0	23.5024	103	61	34	140.7	1001	305.46	2.94	2.6	2.76	陈必芳	510702196604276429	103308210047
0	294	2	3	3	2	23	1	1	1	1	1	3	-1	-1	1	1	152.0	54.2	78.0	23.4591	108	69	17	0	13.81	0.68	1.92	0.14	0.11	朱春梅	510626199002287402	103309230128
0	296	2	3	3	2	50	3	3	3	1	1	3	-1	-1	1	1	150.0	52.3	76.0	23.2444	131	58	58	16.1	1001	91.37	1.68	0.15	0.11	孙红宇	510702196309185428	103310150021
0	297	2	3	3	1	56	3	3	3	1	1	3	1	1	1	1	165.0	63.4	77.0	23.2874	124	77	36	3.3	236.48	7.92	7.83	8.03	7.32	任万发	510702195708155416	103309110053
0	299	2	3	3	2	18	1	1	1	1	2	3	1	1	1	1	150.0	40.3	60.0	17.9111	108	71	22	2.87	578.7	29.91	0.13	0.12	0.21	邓玲	510703199506153126	103310040022
0	301	2	3	3	2	49	2	3	2	1	1	3	-1	-1	1	1	156.0	62.2	76.0	25.5588	112	68	16	97	1001	364.12	0.005	8.1	7.58	邓德凤	51060219640801512X	103310180080
0	302	2	3	3	2	51	3	3	3	1	1	3	-1	-1	1	1	158.0	56.5	76.0	22.6326	149	88	29	9.33	182.36	78.34	8.13	7.12	5.94	林桂琼	510702196207225441	103310060064
0	303	2	3	3	1	56	3	3	3	1	1	3	-1	-1	1	1	155.0	60.2	86.0	25.0572	141	83	34	47.89	33.84	46.95	0.91	0.91	0.81	何奉生	510602195706025110	103310060063
0	309	2	3	3	2	58	3	3	3	1	1	3	1	1	1	1	152.0	63.4	84.0	27.4411	146	76	21	3.7	511.39	27.41	0.005	9.49	8.95	刘世斌	510702195503165426	103308300023
0	310	2	3	3	1	26	1	1	1	1	2	3	-1	-1	1	1	176.0	87.1	90.0	28.1185	129	93	61	63.1	31.7	25.54	0.005	6.85	9.09	郭永虎	510703198609273118	103309020067
0	311	2	3	3	2	29	1	1	1	1	1	3	-1	-1	1	1	155.0	47.0	66.0	19.563	101	62	23	51.5	601.62	134.72	0.004	0.05	7.91	杨雪蓉	510823198406177063	103309030013
0	312	2	3	3	1	50	3	3	3	1	3	3	1	2	1	1	156.0	62.3	90.0	25.5999	114	73	20	26.9	85.5	29.57	0.005	6.73	5.21	周永远	510702196301185415	103310070007
0	313	2	3	3	2	49	2	3	2	1	1	3	1	1	1	1	153.0	56.5	74.0	24.136	127	68	35	26	48.21	46.3	0.083	2.83	2.42	李琼芳	510702196311065425	103309260012
0	314	2	3	3	2	47	2	3	2	1	1	3	-1	-1	1	1	155.0	61.4	78.0	25.5567	134	82	15	6.1	64.65	5	0.007	6.82	5.59	孙德凤	510702196603215544	103311040057
0	315	2	3	3	1	52	3	3	3	1	1	3	1	1	2	2	164.0	67.9	92.0	25.2454	144	77	66	13.2	70.62	17.01	0.005	7.66	7.08	孙德育	51070219610415541X	103308230030
0	316	2	3	3	2	49	2	3	2	1	1	3	1	1	1	1	156.0	64.0	78.0	26.2985	156	116	17	0	1001	1001	0.005	6.16	5.96	陈显述	510702196406045427	103308230031
0	317	2	3	3	2	43	2	2	2	1	1	3	1	1	1	1	150.0	54.3	82.0	24.1333	116	79	20	146.9	83.78	502.46	0.005	1.51	5.82	王银芳	510702197010065020	103310180025
0	319	2	3	3	2	22	1	1	1	1	1	3	-1	-1	1	1	155.0	64.2	80.0	26.7222	136	79	22	85.6	375.42	43.04	0.005	0.17	0.1	王彩霞	510922199108235206	103310090020
0	320	2	3	3	1	54	3	3	3	1	1	3	1	1	1	1	160.0	45.0	70.0	17.5781	143	92	110	2.4	30.46	4.92	0.005	8.71	8.06	马成文	510702195811025433	103308260011
0	321	2	3	3	2	39	2	2	2	1	1	3	1	1	1	1	146.0	44.9	65.0	21.064	114	61	11	0	10.53	18.1	1.73	0.14	4.78	米晓娟	51060219731009512X	103308120032
0	323	2	3	3	2	43	2	2	2	1	1	3	1	1	1	1	155.0	68.8	92.0	28.6368	134	85	80	39.5	17.65	21.73	0.005	8.21	7.3	蒋彩英	510602197002275284	103309290076
0	324	2	3	3	2	56	3	3	3	1	1	3	1	1	1	1	145.0	46.3	76.0	22.0214	108	64	40	0	161.01	23.79	0.11	8.63	7.68	郭清莲	510702195610075426	103309060051
0	325	2	3	3	2	48	2	3	2	1	1	3	1	1	1	1	145.0	44.1	70.0	20.975	111	58	16	8.88	362.84	146.65	7.5	0.39	0.36	肖哓蓉	51070219650912542X	103309130036
0	326	2	3	3	1	25	1	1	1	1	2	3	2	3	1	1	174.0	87.0	95.0	28.7356	172	90	134	0.05	370.46	150.08	9.56	0.07	7.29	周强	510703198710283118	103308060053
0	327	2	3	3	2	35	2	2	2	1	1	3	-1	-1	1	1	156.0	52.7	70.0	21.6552	103	67	18	21.19	72.62	7.87	8.98	9.02	8.03	谢晓莉	510702197803235421	103310040144
0	328	2	3	3	2	55	3	3	3	1	1	3	1	1	1	1	148.0	47.5	70.0	21.6855	119	64	26	7.62	51.12	4.05	4.16	9.25	7.8	赵礼蓉	510702195708285421	103308270024
0	330	2	3	3	1	49	2	3	2	1	1	3	1	2	2	2	160.0	64.3	82.0	25.1172	166	110	69	1.57	1001	276.59	0.11	0.1	0.11	谢家康	510702196407065411	103309200079
0	331	2	3	3	2	59	3	3	3	1	1	3	1	2	1	1	146.0	48.9	73.0	22.9405	132	86	73	42.9	339.17	129.64	0.2	0.07	0.16	王聪	510702195406295421	103308220035
0	332	2	3	3	2	52	3	3	3	1	1	3	-1	-1	1	1	148.0	52.6	76.0	24.0139	118	67	19	14.51	223.84	175.16	0.95	0.82	6.52	杨琼英	510702196011205529	103310040184
0	333	2	3	3	2	59	3	3	3	1	1	3	1	3	1	1	150.0	44.9	86.0	19.9556	116	77	20	28.42	8.25	1001	1.24	7.1	7.64	田兴琼	510702195409145445	103310050057
0	335	2	3	3	1	43	2	2	2	1	1	3	2	2	2	2	164.0	51.7	66.0	19.2222	140	100	30	20.61	1001	108.85	1.12	1	0.11	谢忠华	510702197001065416	103308300042
0	337	2	3	3	1	22	1	1	1	1	1	3	-1	-1	1	1	182.0	57.0	68.0	17.2081	114	74	29	0.5	1001	1001	9.42	7.76	7.62	李超	510703199104093116	103309130052
0	338	2	3	3	1	47	2	3	2	1	1	3	2	2	1	1	165.0	58.6	80.0	21.5243	106	69	29	0	1001	945.62	0.005	5.23	4.92	李念华	51070219660615541X	103309130051
0	339	2	3	3	2	44	2	2	2	1	1	3	1	1	1	1	152.0	52.2	68.0	22.5935	116	71	60	0	529.74	65.32	0.12	1.15	1.32	郑素蓉	510702196812275447	103308120046
0	340	2	3	3	2	45	2	3	2	1	1	3	1	1	1	1	155.0	61.4	80.0	25.5567	118	74	20	7.71	122.04	37.02	8.76	0.01	0.1	杨荣华	510821196805056320	103309230053
0	341	2	3	3	2	35	2	2	2	1	1	3	1	1	1	1	150.0	46.5	67.0	20.6667	115	76	15	63.68	89.26	47.54	8.41	7.95	5.21	李红梅	510702197802175447	103308260071
0	342	2	3	3	2	40	2	2	2	1	1	3	1	1	1	1	163.0	50.5	61.0	19.0071	107	69	13	1.58	187	224.02	0.11	5.16	3.59	王小蓉	510702197302175029	103309100046
0	343	2	3	3	1	43	2	2	2	1	1	3	2	2	1	1	176.0	78.6	92.0	25.3745	115	74	82	>1000	19.62	20.83	8.59	10.08	9.66	李建	510702197002195415	103309260192
0	344	2	3	3	2	19	1	1	1	1	2	3	1	1	1	1	165.0	45.5	65.0	16.7126	84	59	15	30.2	465.58	56.51	0.48	0.12	0.09	崔云	510703199408193124	103309180090
0	347	2	3	3	2	42	2	2	2	1	1	3	1	1	1	1	124.0	38.3	73.0	24.9089	108	70	26	0.08	7.6	176.78	0.13	0.12	0.08	向万秀	510702197106105429	103308290105
0	348	2	3	3	1	44	2	2	2	1	1	3	1	2	1	1	166.1	81.9	102.0	29.6855	137	79	15	7.18	379.47	54.34	1.1	0.89	0.73	王安武	510702196901035410	103309100004
0	349	2	3	3	2	19	1	1	1	1	2	3	1	1	1	1	165.0	49.0	68.0	17.9982	120	80	18	0	40.34	5.85	0.21	0.12	0.1	王晓凤	510703199407083126	103310090038
0	350	2	3	3	1	48	2	3	2	1	1	3	-1	-1	1	1	147.0	69.9	94.0	32.3476	134	90	104	7.82	1001	27.64	7.74	7.19	6.42	林子才	510702196502265518	103310300016
0	351	2	3	3	1	51	3	3	3	1	1	3	3	1	1	1	167.0	57.6	73.0	20.6533	121	73	41	0	9.81	6.69	0.22	0.11	0.1	阳清华	510702196207145417	103308070019
0	353	2	3	3	2	57	3	3	3	1	1	3	1	1	2	2	155.0	66.3	87.0	27.5963	146	86	44	160.89	1001	226.4	9.11	9.51	8.97	杨玉琼	510702195606155423	103309050015
0	355	2	3	3	1	48	2	3	2	1	1	3	2	3	1	1	162.0	65.1	88.0	24.8057	127	82	18	3.81	5.81	5.29	7.41	7.81	6.27	向能甫	510702196503255418	103310070011
0	356	2	3	3	2	23	1	1	1	1	2	3	-1	-1	1	1	168.0	58.2	72.0	20.6207	124	85	61	0	11.24	0.62	0.34	0.1	6.1	邓木兰	510703199001273122	103309290061
0	357	2	3	3	2	59	3	3	3	1	1	3	-1	-1	2	2	145.0	47.6	70.0	22.6397	167	88	11	85.77	1001	105.12	2.66	3.27	5.91	贾述兰	510702195403215529	103311080058
0	358	2	3	3	2	51	3	3	3	1	1	3	1	1	1	1	150.0	64.6	95.0	28.7111	142	101	109	204.38	1001	2.82	0.91	0.96	0.99	蓝玉芳	510702196109195429	103309130012
0	359	2	3	3	2	36	2	2	2	1	1	3	1	1	1	1	165	67.5	78.0	24.7934	136	90	24	51.3	294.58	227.76	8.35	8.81	7.56	李明琼	510702197610095047	103309270012
0	360	2	3	3	1	41	2	2	2	1	1	3	2	3	1	1	170.0	61.0	79.0	21.1073	143	87	121	281.47	881.18	525.3	9.07	8.86	8.38	赵宗泽	510702197110275412	103309280002
0	361	2	3	3	2	40	2	2	2	1	1	3	1	1	2	2	145.0	62.8	90.0	29.8692	195	124	18	0	1001	7.28	0.14	0.19	0.09	杨桂梅	510702197303195427	103309280001
0	362	2	3	3	2	58	3	3	3	1	1	3	1	1	1	1	155.0	50.6	83.0	21.0614	143	76	181	720.73	1001	831.09	5	4.87	4.87	赖述琼	510702195505255468	103309280032
0	364	2	3	3	1	40	2	2	2	1	1	3	2	3	1	1	163.0	56.2	74.0	21.1525	78	63	23	197.86	1001	647.64	8.46	8.8	8.2	杨其刚	510702197302105418	103309280111
0	366	2	3	3	2	47	2	3	2	1	1	3	1	1	1	1	161.0	82.1	98.0	31.6732	136	82	40	2.05	14.45	3.18	7.7	9.95	8.85	米琼茹	510702196602205424	103309260117
0	367	2	3	3	1	58	3	3	3	1	1	3	2	3	1	1	155.0	58.7	88.0	24.4329	127	66	65	0.58	13.15	2.97	4.21	3.94	3.3	李科泉	510702195505185439	103309170124
0	369	2	3	3	2	40	2	2	2	1	1	3	1	1	1	1	155.0	47.0	64.0	19.563	116	73	23	1.01	323.98	105.84	0.11	0.22	0.11	米述平	510602197210124448	103309220040
0	370	2	3	3	2	37	2	2	2	1	1	3	-1	-1	1	1	155.0	46.9	84.0	19.5213	108	70	15	2.65	114.99	103.02	8.56	8.06	8.47	谢晓燕	510702197510225449	103310040197
0	371	2	3	3	1	58	3	3	3	1	1	3	1	2	1	1	165.0	67.8	86.0	24.9036	144	95	46	20.54	449.27	65.1	1.2	1.89	1.1	赵春昌	510702195501105411	103310040065
0	373	2	3	3	1	27	1	1	1	1	3	3	2	1	1	1	175.0	54.0	64.0	17.6327	97	57	32	0.12	15.97	354.41	0.08	0.6	0.06	阳小虎	51070319851215311X	103308140053
0	375	2	3	3	1	35	2	2	2	1	1	3	-1	-1	1	1	171.0	59.5	79.0	20.3481	108	71	27	28.27	1001	330.75	6.06	6.08	5.66	赵智勇	510702197711295419	103310040044
0	376	2	3	3	2	35	2	2	2	1	1	3	-1	-1	1	1	165.0	57.9	76.0	21.2672	116	81	19	79.05	1001	450.93	3.69	4.37	3.26	胡自容	510781197710206002	103310040048
0	377	2	3	3	1	42	2	2	2	1	1	3	1	1	1	1	166.0	83.8	100.0	30.4108	135	92	158	12.59	290.64	29.41	8.71	8.85	5.91	李正远	510702197103105415	103310240002
0	378	2	3	3	1	50	3	3	3	1	1	3	2	1	1	1	160.0	57.8	84.0	22.5781	164	100	125	8.66	5.84	89.99	8.34	3.26	8.73	唐毅	510702196303015452	103310180070
0	379	2	3	3	2	39	2	2	2	1	1	3	1	1	1	1	154.0	57.2	82.0	24.1187	142	91	14	0	14.47	408.04	0.08	4.93	2.24	张红梅	510722197408157422	103310180069
0	380	2	3	3	2	59	3	3	3	1	1	3	-1	-1	2	2	150.0	55.6	90.0	24.7111	154	87	17	37.95	828.16	3.63	2.35	2.99	0.24	张秀英	510702195402085443	103310180043
0	381	2	3	3	2	34	2	2	1	1	1	3	1	1	1	1	160.0	60.6	84.0	23.6719	112	67	29	31.85	119.94	1.64	0.68	0.76	7.25	文容	510703197906303825	103310110015
0	383	2	3	2	1	50	3	3	3	1	1	3	1	1	2	2	165.0	75.6	90.0	27.7686	130	76	48	18.1	\N	110.8	0.006	\N	5.09	詹章荣	510702196309085419	103309230114
0	384	2	3	3	1	59	3	3	3	1	1	3	2	1	2	2	156.0	60.9	87.0	25.0247	158	84	88	12.72	35.22	14.88	1.34	1.34	1.49	谢志友	510702195408265410	103309060079
0	385	2	3	3	2	22	1	1	1	1	2	3	1	1	1	1	160.0	60.8	73.0	23.75	121	66	13	4.61	303.68	808.48	0.12	0.08	0.05	代敏	510626199106255122	103308270033
0	387	2	3	3	2	41	2	2	2	1	1	3	1	1	1	1	160.0	48.5	72.0	18.9453	137	84	14	5.08	20.84	7.28	6.75	9.02	8.55	李春芳	513026197212125680	103312230001
0	388	2	3	1	2	38	2	2	2	1	1	3	1	1	1	1	158.0	55.1	78.0	22.0718	130	83	33	1.56	68.88	\N	0.09	0.09	\N	张秀蓉	510802197505022204	103309220078
0	389	2	3	3	1	18	1	1	1	1	1	3	-1	-1	1	1	173.0	53.5	72.0	17.8756	105	68	40	0	1001	35.68	1.5	0.09	7.27	廖磊	510703199509293116	103310200017
0	390	2	3	3	1	32	2	2	1	1	1	3	3	2	1	1	165.0	65.6	78.0	24.0955	120	83	24	4.51	17.41	140.53	0.07	0.05	1.39	赵宗治	510703198012273115	103309200065
0	391	2	3	3	1	51	3	3	3	1	3	3	2	1	1	1	169.0	71.3	86.0	24.9641	133	86	147	0.13	5.17	0.8	6.59	6.29	6.79	王申玉	510702196111095419	103308140024
0	393	2	3	3	2	56	3	3	3	1	1	3	1	1	1	1	152.0	46.7	72.0	20.213	120	66	14	0	136.57	1001	0.005	6.95	5.75	龙顺琼	510702195710185526	103310280035
0	395	2	3	3	1	18	1	1	1	1	2	3	-1	-1	1	1	170.0	57.4	68.0	19.8616	98	48	17	31.75	1001	2.22	0.14	1.26	0.12	秦秋平	510703199508083117	103310040167
0	397	2	3	3	2	34	2	2	1	1	1	3	1	1	1	1	150.0	46.8	70.0	20.8	117	71	48	47.9	97.7	18.96	0.065	3.14	8.16	王正英	511121197904258523	103309200063
0	398	2	3	3	1	27	1	1	1	1	1	3	2	2	1	1	172.0	58.0	70.0	19.6052	134	82	26	27.61	1001	1001	9.49	9.39	8.74	邓伟	51070319860402311X	103312270006
0	400	2	3	3	2	41	2	2	2	1	1	3	1	1	1	1	158.0	61.1	80.0	24.4752	120	50	17	287.75	1001	269.74	1.96	1.82	0.09	谢素蓉	510702197206105426	103309120009
0	402	2	3	3	2	35	2	2	2	1	1	3	1	1	1	1	155.0	50.8	74.0	21.1446	110	69	20	25.72	57.34	3.38	3.07	2.44	1.58	傅玉琼	510702197802105422	103309020085
0	403	2	3	3	2	56	3	3	3	1	1	3	1	1	1	1	152.0	63.4	89.0	27.4411	140	80	46	82.66	1001	30.52	1.3	1.21	7.93	贾翠环	510702195707195424	103311170009
0	404	2	3	3	1	51	3	3	3	1	1	3	1	2	1	1	165.0	71.2	90.0	26.1524	136	89	60	>1000	1001	1001	7.57	7.23	6.53	张兴华	510702196206185417	103309300082
0	406	2	3	3	1	58	3	3	3	1	1	3	1	1	1	1	170.0	61.2	84.0	21.1765	135	75	30	6	46	253.22	3.03	3.44	8.65	周昌华	510702195508185434	103309210011
0	408	2	3	3	2	53	3	3	3	1	1	3	1	1	1	1	146.0	60.0	82.0	28.1479	107	64	26	8.6	5.38	1.1	2.44	1.42	1.32	李念凤	510602196005033745	103312300009
0	412	2	3	3	2	34	2	2	1	1	1	3	1	1	1	1	156.0	48.0	72.0	19.7239	102	59	19	18.43	12.69	168.74	7.95	8.18	7.19	董见红	510702197809295425	103309040125
0	413	2	3	3	1	39	2	2	2	1	1	3	2	2	1	1	168.0	62.7	78.0	22.2151	127	79	18	0	1001	946.07	1.48	0.3	0.29	周祖洪	510702197407135410	103309040122
0	414	2	3	3	2	26	1	1	1	1	1	3	1	1	1	1	165.0	56.1	83.0	20.6061	139	80	19	0.02	50.61	355.5	0.26	0.18	0.2	邓丽娟	510703198708022621	103309190010
0	415	2	3	3	2	50	3	3	3	1	1	3	1	3	1	1	162.0	68.0	88.0	25.9107	122	75	23	4.3	83.41	71.45	0.005	0.36	5.84	谢桂琼	510702196306095427	103309160022
0	416	2	3	3	2	58	3	3	3	1	1	3	1	1	1	1	147.0	49.0	71.0	22.6757	139	89	20	19.77	272.32	50.35	9.11	8.86	8.28	李昌凤	510702195412235468	103308010031
0	417	2	3	2	2	42	2	2	2	1	1	3	1	1	1	1	150.0	45.1	70.0	20.0444	104	70	22	0.79	\N	28.73	0.14	\N	0.12	余术华	510602197011204269	103309190012
0	419	2	3	3	1	34	2	2	1	1	1	3	-1	-1	1	1	168.0	69.3	83.0	24.5536	130	73	36	0	11.14	534.86	0.11	0.32	1.53	周代长	510703197903133111	103310130012
0	420	2	3	2	2	43	2	2	2	1	1	3	1	1	1	1	150.0	60.3	91.0	26.8	114	77	21	48.47	\N	624.17	4.69	\N	7.44	谢桂芳	510602196911194807	103309190002
0	426	2	3	3	2	59	3	3	3	1	1	3	1	1	1	1	140.0	52.5	86.0	26.7857	143	75	32	21.3	110.37	53.66	7.45	6.7	5.43	邓会英	510702195309265423	103309250039
0	427	2	3	2	2	42	2	2	2	1	1	3	1	1	1	1	152.0	42.2	77.0	18.2652	110	74	6	9.7	\N	28.36	0.005	\N	7.33	甘云兰	510702197106226327	103310240029
0	437	2	3	3	2	38	2	2	2	1	1	3	1	1	1	1	152.0	50.6	72.0	21.901	131	73	14	0	18.96	0.56	0.25	0.11	0.08	白小春	510702197502095429	103309160092
0	438	2	3	3	1	50	3	3	3	1	1	3	2	1	1	1	160.0	51.2	65.0	20	120	76	36	2.25	18.89	62.36	5.43	6.04	7.89	杨兴成	510702196210165419	103309060036
0	441	2	3	3	2	32	2	2	1	1	1	3	1	1	1	1	160.0	58.0	70.0	22.6562	113	71	14	2.35	26.07	29.56	7.05	8.62	7.84	胡明英	510921198105158443	103310040079
0	442	2	3	3	1	33	2	2	1	1	2	3	-1	-1	1	1	174.0	74.0	81.0	24.4418	136	81	21	6.95	105	253.37	6.1	6.1	1.3	刘定胜	510703198006183113	103310040078
0	443	2	3	3	1	38	2	2	2	1	1	3	1	3	1	1	165.0	82.2	94.0	30.1928	133	84	23	10.51	58.97	16.51	3.65	4.45	3.07	郭永双	510702197502255410	103311160004
0	444	2	3	3	2	59	3	3	3	1	3	3	1	1	2	2	155.0	63.7	90.0	26.514	178	95	35	20.26	97.33	19.96	0.29	0.27	0.14	李秀琼	510702195404235425	103308230024
0	445	2	3	3	2	54	3	3	3	1	1	3	1	1	1	1	147.0	42.9	64.0	19.8528	111	63	28	7.43	198.82	18.25	8.17	8.74	8.66	李秀琼	510702195908225423	103309120016
0	447	2	3	3	2	38	2	2	2	1	1	3	1	1	1	1	156.0	65.9	83.0	27.0792	121	82	38	0	12.62	55.33	0.005	6.89	8.85	郭燕	510702197503025422	103309040094
0	448	2	3	3	2	35	2	2	2	1	2	3	1	1	1	1	165.0	53.3	62.0	19.5776	101	58	18	41.04	358.06	136.22	5.33	6.95	5.58	郑桂群	510702197808175421	103308270029
0	449	2	3	3	1	58	3	3	3	1	1	3	1	1	1	1	164.0	63.0	86.0	23.4236	133	88	34	16.34	19.84	17.09	9.09	9.48	7.34	谢代坤	510702195507245415	103308010022
0	450	2	3	3	2	51	3	3	3	1	3	3	1	1	1	1	147.0	54.0	77.0	24.9896	117	75	39	205.13	617.69	264.1	5.07	6.2	5.15	杨秀如	510702196202105520	103307310028
0	452	2	3	3	2	59	3	3	3	1	1	3	1	1	1	1	160.0	53.8	68.0	21.0156	127	67	19	7.42	55.37	222.25	1.55	1.74	1.43	周桂英	510702195405155427	103308270027
0	453	2	3	3	2	39	2	2	2	1	1	3	1	1	1	1	161.0	57.2	72.0	22.067	115	66	16	34.18	666.85	108.75	5.11	0.82	4.65	邓秀华	510702197310085429	103310070068
0	455	2	3	3	2	56	3	3	3	1	1	3	1	1	1	1	153.0	61.4	83.0	26.2292	155	102	62	0	0.57	0.43	0.005	10.37	9.73	杨光惠	51070219570506544X	103308040023
0	459	2	3	3	2	20	1	1	1	1	2	3	1	1	1	1	155.0	45.6	74.0	18.9802	104	57	12	22	49.66	37.29	1.47	0.19	4.9	刘蓉梅	510703199211273120	103309290008
0	461	2	3	2	1	56	3	3	3	1	1	3	1	1	1	1	163.0	59.8	80.0	22.5074	109	73	18	0.1	\N	2.61	10.22	\N	7.02	周连开	510702195703015414	103309260020
0	462	2	3	3	2	23	1	1	1	1	1	3	1	1	1	1	160.0	60.1	77.0	23.4766	108	68	25	40.22	412.34	197.59	9.45	9.18	8.66	赵丹	510722198909108682	103308290032
0	464	2	3	3	2	25	1	1	1	1	1	3	1	1	1	1	150.0	57.2	78.0	25.4222	135	74	40	157.65	233.65	109	2.05	2.18	9.04	唐小春	51072219871216586X	103309270094
0	465	2	3	3	1	50	3	3	3	1	1	3	1	1	1	1	160.0	73.7	94.0	28.7891	164	94	20	7.51	14.63	41.16	10.11	0.23	4.75	赖仁富	510702196304225419	103311100013
0	466	2	3	3	2	27	1	1	1	1	1	3	-1	-1	1	1	156.0	57.3	80.0	23.5454	114	77	32	0	20.2	3.41	0.12	0.01	0.05	陈万芳	51070319851209202X	103310040046
0	467	2	3	2	1	32	2	2	1	1	1	3	-1	-1	1	1	166.0	78.0	90.0	28.306	146	104	59	0	\N	7.42	0.11	\N	0.11	周健	510703198104223115	103310040045
0	468	2	3	3	1	52	3	3	3	1	1	3	3	3	1	1	165.0	58.4	87.0	21.4509	114	73	55	34.52	660.33	173.81	0.21	1.02	0.51	谭清元	510702196104145414	103309040121
0	469	2	3	3	2	50	3	3	3	1	1	3	1	1	1	1	150.0	50.0	74.0	22.2222	123	69	45	1.23	119.21	4.91	4.38	4.72	4.13	向光丽	510702196301145421	103310070020
0	470	2	3	3	1	50	3	3	3	1	3	3	2	1	1	1	136.0	43.4	70.0	23.4645	93	61	40	5.31	45.61	73.06	7.36	8.26	7.52	郑福国	510702196302155410	103308300047
0	471	2	3	3	2	36	2	2	2	2	2	3	1	1	1	1	155.0	54.6	81.0	22.7263	114	71	27	56.26	699.08	17.75	0.68	0.96	8.53	李红	510702197708075423	103309240169
0	472	2	3	3	1	35	2	2	2	1	1	3	1	2	1	1	160.0	65.4	89.0	25.5469	110	59	33	5.29	72.94	537.88	8.95	9.8	8.29	谢发志	510702197711055415	103309120054
0	474	2	3	3	2	21	1	1	1	1	2	3	-1	-1	1	1	153.0	35.2	58.0	15.037	123	84	15	9.68	339.03	632.7	0.15	0.1	8.98	雷婷婷	510703199207123146	103308020013
0	476	2	3	1	2	38	2	2	2	1	1	3	1	1	1	1	154.0	52.5	78.0	22.137	130	82	13	23.28	257.7	\N	4.55	5.35	\N	杨顺蓉	510702197508195420	103312250010
0	479	2	3	3	1	16	1	1	1	1	2	3	1	1	1	1	165.0	45.8	60.0	16.8228	108	70	10	1.53	950.63	1001	0.13	0.07	0.15	李锐	510703199708053115	103310040153
0	480	2	3	2	1	15	1	1	1	1	1	3	1	1	1	1	161.0	41.8	64.0	16.1259	105	65	63	2.12	\N	377.48	0.15	\N	0.08	郭雨	510703199806273111	103308130035
0	484	2	3	3	1	35	2	2	2	1	1	3	1	1	1	1	170.0	68.0	80.0	23.5294	131	80	43	0	74.54	10.35	1.71	0.23	3.47	王坤	510702197803255414	103308300100
0	485	2	3	3	2	31	2	2	1	1	1	3	1	1	1	1	160.0	49.8	67.0	19.4531	119	76	24	7.13	1001	176.7	6.05	5.93	7.85	张燕	510722198208165641	103309030077
0	487	2	3	2	1	36	2	2	2	1	3	3	2	2	1	1	165.0	57.4	69.0	21.0836	101	49	20	33.67	\N	140.67	0.9	\N	7.6	邹能贵	510702197708115413	103309060040
0	488	2	3	3	2	37	2	2	2	1	1	3	1	1	1	1	146.0	44.5	72.0	20.8763	120	74	14	14.136	278.18	99.23	3.77	3.67	3.79	蒋琼芳	510722197608107665	103309060043
0	490	2	3	2	2	38	2	2	2	1	1	3	1	1	1	1	155.0	46.0	65.0	19.1467	120	66	10	5.39	\N	825.82	5.33	\N	4.24	王桂兰	510702197502266427	103310180074
0	491	2	3	3	1	31	2	2	1	1	1	3	2	2	1	1	166.0	55.0	72.0	19.9594	117	67	23	25.5	530.08	48.65	8.38	8.23	7.82	郭永建	510703198206203115	103309020071
0	492	2	3	2	1	24	1	1	1	1	1	3	-1	-1	1	1	170.0	86.0	88.0	29.7578	137	68	37	36.83	\N	686.6	0.93	\N	0.91	吴友刚	510703198906113110	103312260006
0	493	2	3	3	2	36	2	2	2	1	1	3	1	1	1	1	160.0	76.3	93.0	29.8047	118	81	27	0.75	104.49	118.33	8.84	8.76	8.8	徐位燕	510726197609254822	103309030052
0	494	2	3	2	1	21	1	1	1	1	2	3	1	1	1	1	170.0	51.0	62.0	17.6471	119	76	16	0	\N	40.44	1.88	\N	0.14	李小明	510703199108183119	103308130003
0	495	2	3	3	2	30	2	2	1	1	1	3	1	1	1	1	140.0	46.0	82.0	23.4694	125	73	30	0	3.89	0.81	0.11	0.06	0.06	刘小兰	510703198211223129	103309270145
0	497	2	3	3	1	26	1	1	1	1	1	3	2	3	1	1	163.0	66.1	76.0	24.8786	122	62	95	0	89.7	366.77	0.04	0.03	2.42	郭小虎	51070319870117311X	103308300074
0	500	2	3	3	2	34	2	2	1	2	1	3	1	2	1	1	160.0	70.0	87.0	27.3437	123	71	17	11.01	237.12	391.13	8.92	9.54	8.56	盖艳霞	152322197810271621	103309280027
0	501	2	3	3	2	24	1	1	1	1	2	3	1	1	1	1	166.0	58.9	72.0	21.3747	118	74	13	0.5	26.27	39.33	0.23	0.2	0.12	韩成玉	511132198907101744	103310040021
0	502	2	3	3	1	36	2	2	2	1	1	3	2	2	1	1	155.0	59.0	80.0	24.5578	140	78	35	0	1.58	8.1	1.89	0.06	8.1	詹勇	510702197705185416	103401200016
0	503	2	3	3	2	21	1	1	1	1	2	3	-1	-1	1	1	160.0	44.3	62.0	17.3047	112	89	22	60.33	1001	0.17	0.17	0.15	0.19	赖婷婷	51070319920317312X	103309040074
0	504	2	3	3	2	33	2	2	1	1	1	3	1	1	1	1	160.0	53.5	72.0	20.8984	105	64	37	0	127	241.32	0.16	0.09	0.06	金义娇	510602197912244268	103309060072
0	505	2	3	3	1	16	1	1	1	1	1	3	-1	-1	1	1	156.0	52.2	76.0	21.4497	140	81	7	0.93	123.23	34.63	0.1	0.1	0.08	李钊	510703199707213113	103310260023
0	506	2	3	3	2	24	1	1	1	1	1	3	1	1	1	1	155.0	45.9	64.0	19.1051	114	79	17	30.84	1001	344.86	9.19	0.06	0.05	李春	510703198901093122	103309180095
0	508	2	3	3	2	24	1	1	1	1	1	3	-1	-1	1	1	155.0	43.0	63.0	17.898	104	58	21	0	108.13	37.77	0.14	0.13	0.11	谢建红	51070319890605312X	103308280062
0	510	2	3	3	2	28	1	1	1	1	3	3	1	1	1	1	156.0	47.3	66.0	19.4362	136	71	8	0.01	38.02	3.28	0.1	0.09	0.09	邱启春	513029198506065787	103310040137
0	512	2	3	3	2	35	2	2	2	1	1	3	1	1	1	1	155.0	63.0	78.0	26.2227	104	69	13	0.04	13.58	13.53	0.32	0.1	0.16	刘碧英	510702197709155521	103308130001
0	516	2	3	3	2	20	1	1	1	1	1	3	1	1	1	1	152.0	49.3	66.0	21.3383	119	76	6	2.1	1001	207.69	1.86	0.21	0.13	谢静	51070319930806312X	103310310028
0	519	2	3	3	1	34	2	2	1	1	1	3	1	1	2	2	164.0	69.5	88.0	25.8403	134	92	58	15.9	910.25	7.46	1.94	2.52	8.7	廖绪林	510702197811225418	103311010027
0	520	2	3	3	1	28	1	1	1	1	1	3	-1	-1	1	1	170.0	76.7	93.0	26.5398	125	84	56	0	38.28	64.68	0.19	0.318	0.17	周奠斌	510626198409085111	103308050055
0	521	2	3	3	1	32	2	2	1	1	1	3	2	1	1	1	176.0	90.5	96.0	29.2162	114	65	36	>1000	1001	1.89	2.61	2.48	6.37	苏刚	510703198106011335	103309130050
0	523	2	3	3	2	31	2	2	1	1	1	3	1	1	1	1	150.0	60.0	76.0	26.6667	148	68	13	812.1	700.86	185.74	0.006	8.66	8.83	曾礼萍	510703198204293129	103401250022
0	524	2	3	2	1	30	2	2	1	1	1	3	1	1	1	1	165.0	55.8	70.0	20.4959	110	70	16	86.38	\N	183.31	8.07	\N	7.24	谢建辉	510703198212023110	103309280095
0	530	2	3	3	2	20	1	1	1	1	2	3	-1	-1	1	1	165.0	50.0	61.0	18.3655	98	70	12	0.04	88.78	1.32	0.09	0.35	2.68	李桂如	510703199308113123	103309230076
0	531	2	3	3	1	28	1	1	1	1	1	3	-1	-1	1	1	174.0	78.9	86.0	26.0602	136	80	23	0	2.46	1.94	0.005	9.96	9.17	李伯洪	510703198412263119	103309160064
0	532	2	3	3	2	25	1	1	1	1	2	3	1	1	1	1	155.0	57.0	75.0	23.7253	121	65	20	0.15	14.17	12.73	0.13	0.25	0.12	崔丹丹	510703198806143128	103308130030
0	534	2	3	3	2	15	1	1	1	1	2	3	1	1	1	1	160.0	45.7	59.0	17.8516	105	62	6	0.31	1001	239.82	0.15	0.12	0.17	罗莉	510703199801083140	103308300012
0	536	2	3	3	1	27	1	1	1	1	1	3	2	2	1	1	170.0	72.0	80.0	24.9135	136	88	28	0	415.59	22.52	0.14	0.13	0.09	李奇	510703198601143116	103312270005
0	538	2	3	3	1	17	1	1	1	1	2	3	-1	-1	1	1	170.0	54.0	66.0	18.6851	144	87	18	0	6.48	11.73	1.79	9.04	5.87	纪鹏	510703199605013110	103308090048
0	539	2	3	3	1	16	1	1	1	1	2	3	1	1	1	1	170.0	54.1	68.0	18.7197	101	66	48	0	423.43	117.55	2.01	0.06	0.11	李首国	51070319970820311X	103309200132
0	542	2	3	3	2	29	1	1	1	1	1	3	1	1	1	1	160.0	46.4	66.0	18.125	110	64	24	0	15.88	52.31	1.82	0.14	1.99	郑晓燕	510703198404033129	103309060081
0	543	2	3	3	2	31	2	2	1	1	1	3	1	1	1	1	155.0	59.1	79.0	24.5994	130	94	28	69.3	104	261.47	0.005	8.28	8.39	方春燕	510703198202172622	103309100061
0	546	2	3	3	1	23	1	1	1	1	1	3	1	1	1	1	165.0	78.6	88.0	28.8705	140	118	252	8.8	404.36	157.58	1.9	0.12	0.17	李明	510703199006203115	103309220013
0	548	2	3	3	2	34	2	2	1	1	1	3	1	1	1	1	145.0	44.0	63.0	20.9275	99	64	24	0	201.02	23.7	0.024	5.35	5.05	范桂英	510602197902084264	103308090094
0	550	2	3	3	2	25	1	1	1	1	1	3	1	1	1	1	160.0	46.2	62.0	18.0469	104	82	13	21.85	1001	1001	0.11	0.08	0.19	谢春蓉	510703198804033128	103309130046
0	551	2	3	3	2	27	1	1	1	1	1	3	1	1	1	1	155.0	44.9	68.0	18.6889	110	68	53	25.51	1001	191.17	8.88	9.27	7.2	曾全红	510703198512053127	103308010029
0	554	2	3	3	1	31	2	2	1	1	1	3	3	1	1	1	165.0	50.5	65.0	18.5491	96	65	30	19.8	1001	676.04	0.38	0.41	0.36	刘小明	51070319811205311X	103309020041
0	555	2	3	3	2	39	2	2	2	1	1	3	1	1	1	1	155.0	61.4	80.0	25.5567	127	89	24	2.07	12.92	25.83	0.13	0.14	0.1	杨小春	510702197310205021	103308210003
0	560	2	3	3	1	31	2	2	1	2	1	3	1	2	1	1	170.0	77.1	98.0	26.6782	142	94	244	0.3	95.37	197.94	8.44	9.3	8.14	唐子兵	513224198203090597	103309110062
0	562	2	3	3	2	20	1	1	1	1	2	3	-1	-1	1	1	158.0	50.6	66.0	20.2692	122	65	7	2.18	1001	12.14	0.13	0.11	6.63	曹雪梅	510703199309263289	103311030015
0	563	2	3	3	2	35	2	2	2	1	2	3	-1	-1	1	1	160.0	47.8	66.0	18.6719	118	73	18	19.66	738.3	85.76	2.85	3.05	2.63	张桂华	510702197712125024	103311060064
0	564	2	3	3	2	32	2	2	1	1	1	3	1	1	1	1	165.0	65.0	80.0	23.8751	115	73	8	65.57	1001	443.02	3.11	3.04	2.92	谢蓉	510703198109073128	103311020075
0	566	2	3	3	2	35	2	2	2	1	1	3	1	1	1	1	158.0	52.0	76.0	20.83	114	72	20	3.82	0.4	12.14	10.24	0.02	6.63	谢东珍	510702197711275426	103311020074
0	567	2	3	3	2	26	1	1	1	1	2	3	1	1	1	1	155.0	40.3	67.0	16.7742	104	80	61	0.33	341.49	92.01	0.47	0.15	0.14	罗燕	510703198704183129	103309200100
0	568	2	3	3	1	24	1	1	1	1	1	3	-1	-1	1	1	170.0	53.5	73.0	18.5121	141	89	26	27.28	47.9	47.69	8.8	8.79	7.96	李超	510703198904213118	103311040067
0	570	2	3	3	2	29	1	1	1	1	1	3	1	1	1	1	146.0	47.8	70.0	22.4245	127	87	22	1.53	388.96	697.99	0.12	0.1	0.18	梁小琼	510723198408163209	103309200095
0	571	2	3	3	2	33	2	2	1	1	1	3	1	1	1	1	157.0	52.7	72.0	21.3802	131	79	18	0	53.09	1.78	1.69	0.12	0.15	景红英	51062219791103722X	103308080052
0	572	2	3	3	1	22	1	1	1	1	2	3	-1	-1	1	1	170.0	58.4	74.0	20.2076	112	70	55	0.33	119.39	238.79	0.15	0.15	1.79	赵东	510703199011183112	103309240118
0	576	2	3	3	2	18	1	1	1	1	1	3	1	1	1	1	162.0	64.7	76.0	24.6533	124	64	13	0	1001	289.64	1.97	0.11	3.08	贺槿煊	510703199503073120	103312200013
0	577	2	3	3	2	21	1	1	1	1	1	3	1	2	1	1	145.0	49.4	74.0	23.4958	119	70	8	28.17	1001	415.83	0.88	1.03	1.92	米娟	510703199201253126	103310240043
0	580	2	3	2	2	32	2	2	1	1	2	3	1	1	1	1	145.0	47.5	72.0	22.5922	105	76	23	99.44	\N	1001	6.61	\N	5.84	赖桂红	510703198108013123	103308280078
0	582	2	3	3	2	33	2	2	1	1	1	3	1	1	1	1	158.0	50.6	66.0	20.2692	129	96	22	3.2	244.24	959.92	8.33	8.49	7.31	顾萍	510723197911043904	103310060010
0	583	2	3	3	1	15	1	1	1	1	2	3	2	2	1	1	168.0	53.0	62.0	18.7783	110	65	14	3.1	503.2	100.78	0.09	0.12	0.13	郭兴红	510703199710203119	103309060057
0	584	2	3	2	1	26	1	1	1	1	2	3	-1	-1	1	1	164.0	73.6	86.0	27.3647	123	84	144	0	\N	0.97	0.08	\N	0.13	谢兴亮	510703198708143116	103310060014
0	589	2	3	3	1	22	1	1	1	1	1	3	-1	-1	1	1	168.0	62.2	80.0	22.038	153	88	105	0.47	42.91	5.46	0.09	0.1	0.09	唐杰明	510703199110083117	103311090016
0	591	2	3	3	2	38	2	2	2	1	1	3	1	1	1	1	158.0	49.5	82.0	19.8286	155	86	12	52.73	1001	742.13	0.51	0.57	0.54	黄毕华	510725197509140522	103309270035
0	592	2	3	3	1	29	1	1	1	1	1	3	1	1	1	1	175.0	55.5	74.0	18.1224	111	78	19	138.89	162.2	197.66	1.14	1.29	1.03	王勇	51070319840225311X	103309200064
0	594	2	3	3	2	32	2	2	1	1	1	3	1	1	1	1	162.0	56.4	80.0	21.4906	111	72	37	0	41.86	231.62	0.13	0.1	0.42	梁翠平	510823198012015686	103309180017
0	595	2	3	3	1	22	1	1	1	1	1	3	2	1	1	1	165.0	63.1	70.0	23.1772	123	78	27	1.28	525.24	32.26	0.19	0.08	0.15	唐敏	510703199107083116	103312240015
0	596	2	3	3	2	29	1	1	1	1	1	3	1	1	1	1	164.0	56.5	72.0	21.0068	114	65	14	93.45	196	146.47	3.78	3.98	3.26	黄蓉	510703198408223122	103401210017
0	598	2	3	3	2	32	2	2	1	1	3	3	-1	-1	1	1	154.0	43.1	64.0	18.1734	105	64	28	0.2	499.12	12.66	0.09	8.15	0.11	曾红梅	510703198106223127	103308070014
0	600	2	3	3	2	27	1	1	1	1	1	3	1	1	1	1	156.0	62.8	80.0	25.8054	104	50	47	83.99	945.64	0.7	5.04	4.72	1.46	肖红英	510703198601112846	103309090012
0	601	2	3	3	1	30	2	2	1	1	1	3	2	1	1	1	168.0	52.9	63.0	18.7429	124	55	19	12.23	684.96	167.31	1.97	1.9	2.47	郭伟	510703198209223111	103309090011
0	604	2	3	3	2	32	2	2	1	1	1	3	-1	-1	1	1	154.0	46.8	72.0	19.7335	123	75	21	0	41.7	10.88	0.23	0.1	0.11	谢红英	510703198101153123	103310210025
0	605	2	3	3	2	28	1	1	1	1	1	3	1	1	1	1	161.0	62.0	74.0	23.9188	115	71	17	1.24	102.49	220.28	0.07	0.08	0.09	米翠	510626198504134428	103309160110
0	606	2	3	3	2	30	2	2	1	1	1	3	1	1	1	1	165.0	58.1	77.0	21.3407	104	61	24	22.14	4.5	127.3	4.17	0.78	4.4	谢金梅	510722198210194249	103308270005
0	608	2	3	3	2	16	1	1	1	1	3	3	1	1	1	1	168.0	59.6	81.0	21.1168	113	57	27	0	114.06	13.41	0.19	0.11	0.15	李媛	510703199702103126	103308030091
0	610	2	3	3	2	32	2	2	1	1	1	3	-1	-1	1	1	162.0	57.6	78.0	21.9479	111	70	11	4.07	1001	52.91	0.14	0.19	0.18	赵彩霞	511321198106296782	103310260046
0	613	2	3	3	2	16	1	1	1	1	1	3	1	1	1	1	156.0	47.1	64.0	19.354	114	87	15	3	61.39	4.54	1.8	0.11	8.07	白冰雪	510703199612203123	103309200031
0	615	2	3	3	1	31	2	2	1	1	1	3	1	1	1	1	165.0	59.4	79.0	21.8182	117	68	34	0	102.89	1001	1.78	0.11	0.16	向能全	510703198109083115	103308300007
0	617	2	3	1	2	29	1	1	1	1	1	3	1	1	1	1	160.0	62.9	82.0	24.5703	109	69	20	0	22.4	\N	0.005	8.64	\N	李晓琼	510703198404203124	103309300061
0	621	2	3	3	1	20	1	1	1	1	2	3	2	1	1	1	172.0	63.4	74.0	21.4305	112	72	58	25.33	490.53	261.77	0.36	0.05	0.16	李强	510703199209183118	103309160062
0	629	2	3	3	2	20	1	1	1	1	2	3	-1	-1	1	1	155.0	37.5	60.0	15.6087	110	79	26	0	23.21	390.91	1.9	0.11	4.44	邓雪梅	510703199306263144	103310040023
0	630	2	3	3	1	21	1	1	1	1	1	3	-1	-1	1	1	175.0	54.6	64.0	17.8286	148	88	37	280.9	1001	352.61	0.005	9.43	8.73	吴强	510703199203243132	103311020034
0	633	2	3	3	2	16	1	1	1	1	1	3	-1	-1	1	1	152.0	60.3	80.0	26.0994	126	66	138	0	17.75	0.55	1.96	0.12	0.09	李春琼	510703199703253126	103401240007
0	635	2	3	3	2	17	1	1	1	1	2	3	1	1	1	1	165.0	59.2	76.0	21.7447	117	72	15	28.2	1001	19.32	1.87	0.07	0.07	谢丽	510703199601143129	103310280037
0	636	2	3	3	2	19	1	1	1	1	1	3	-1	-1	1	1	165.0	54.7	70.0	20.0918	100	60	10	140.3	176.66	10.83	0.005	9.1	7.55	邓阳炀	510703199408013146	103311100012
0	639	2	3	3	1	16	1	1	1	1	2	3	-1	-1	1	1	182.0	51.1	63.0	15.4269	135	83	15	0	229.99	25.48	1.94	0.21	0.11	吴龙	510703199701303118	103308070068
0	640	2	3	3	2	19	1	1	1	1	1	3	1	1	1	1	150.0	43.2	68.0	19.2	114	70	37	0.05	32.28	22.41	0.12	0.11	0.13	李潼淋	510703199412053124	103401210006
0	646	2	3	2	1	18	1	1	1	1	1	3	1	1	1	1	168.0	60.1	70.0	21.2939	140	70	13	12.04	\N	533.59	0.36	\N	0.08	王金龙	510703199505259658	103309260006
0	649	2	3	3	1	19	1	1	1	1	2	3	1	1	1	1	170.0	56.5	73.0	19.5502	115	65	8	0	60.58	187.8	0.05	0.07	4.91	周俊	51070319931223311X	103311040090
0	652	1	3	1	1	28	1	1	1	1	2	3	-1	-1	1	1	165.0	62.0	76.0	22.7732	118	80	52	12.87	1001	\N	0.13	0.1	\N	兰义兵	510704198412283116	106311100031
0	653	1	3	1	2	23	1	1	1	1	3	1	-1	-1	1	1	157.0	43.0	69.0	17.4449	100	66	12	0.14	64.55	\N	0.11	3.72	\N	周俊芳	510781199002260840	106307180011
0	654	1	3	1	1	23	1	1	1	1	3	1	-1	-1	1	1	177.0	72.0	89.0	22.9819	116	72	80	0	1001	\N	0.031	3.27	\N	顾赛华	320681198910087216	106307190060
0	655	1	3	3	1	29	1	1	1	1	3	1	-1	-1	1	1	183.0	85.0	94.0	25.3815	130	76	41	0.01	119.5	6.15	0.22	0.23	0.27	刘敏	510703198401202417	106310110033
0	656	1	3	3	2	34	2	2	1	1	2	1	1	1	1	1	160.0	55.0	70.0	21.4844	100	60	10	70.88	165.36	171.25	8.96	9.23	8.51	兰容	51070319790206242X	106310110062
0	657	1	3	3	2	58	3	3	3	1	1	1	1	1	1	1	155.0	65.0	87.0	27.0552	124	86	13	15.71	309.77	109.11	0.51	0.52	0.87	张玉芳	51070219550320312X	106310110059
0	658	1	3	2	1	59	3	3	3	1	2	1	1	1	1	1	160.0	60.0	76.0	23.4375	135	70	32	0.18	\N	2.18	0.08	\N	0.12	刘太兴	510702195406253117	106310120002
0	659	1	3	3	2	57	3	3	3	1	1	1	1	1	1	1	158.0	52.0	70.0	20.83	142	80	16	31.19	53.77	45.73	4.23	4.32	5.36	王芳秀	510702195602103124	106310110037
0	660	1	3	2	1	42	2	2	2	1	3	1	2	2	1	1	170.0	89.0	92.0	30.7958	142	90	25	6.38	\N	12.04	8.02	\N	7.66	曹国	510702197104183116	106311090001
0	661	1	3	2	2	54	3	3	3	1	1	3	1	1	1	1	157.0	80.0	92.0	32.4557	124	82	20	1.27	\N	15.3	5.6	\N	6.7	陈再秀	510702195909163121	106310110077
0	662	1	3	3	2	51	3	3	3	1	1	1	1	1	1	1	145.0	55.0	77.0	26.1593	120	70	55	54.51	74.91	28.39	5.32	8.56	4.99	田相琴	510702196205153149	106310170047
0	663	1	3	3	1	42	2	2	2	1	2	1	2	3	1	1	162.0	66.0	80.0	25.1486	108	64	20	3.27	1001	16.27	9.47	0.08	6.96	蒋传林	510702197101073130	106310120084
0	664	1	3	3	2	45	2	3	2	1	1	3	-1	-1	1	1	155.0	53.0	68.0	22.0604	114	60	11	3.9	1001	1001	0.056	3.2	3.12	吴桂容	510721196810056362	106310120103
0	665	1	3	3	2	49	2	3	2	1	3	1	1	1	1	1	166.0	63.0	76.0	22.8625	118	78	12	9.67	24.92	17.64	9.22	8.8	9.08	蒋胜蓉	51070219631120312X	106310100148
0	666	1	3	3	2	40	2	2	2	1	3	1	1	2	1	1	160.0	59.0	74.0	23.0469	122	62	13	18.86	1001	405.81	0.27	0.16	0.18	魏桂华	519002197303230704	106310100145
0	667	1	3	3	2	50	3	3	3	1	3	3	-1	-1	2	2	155.0	80.0	100.0	33.2986	186	86	19	0	108.8	12.16	0.012	4.61	5.82	魏加瑛	510702196303023129	106310110036
0	668	1	3	3	1	40	2	2	2	1	1	1	1	2	1	1	170.0	80.0	88.0	27.6817	110	70	40	3.18	10.25	20.29	6.78	6.74	6.91	李建国	510702197305103119	106310090059
0	669	1	3	1	1	41	2	2	2	1	3	3	2	3	1	1	165.0	60.0	67.0	22.0386	146	94	14	40.1	357.5	\N	8.88	7.81	\N	李贤伟	510702197207163134	106310120108
0	670	1	3	3	2	43	2	2	2	1	1	3	1	1	1	1	155.0	68.0	93.0	28.3039	94	62	47	0.43	28.86	1.14	0.12	0.18	0.13	高长秀	510721197005130464	106310090100
0	671	1	3	3	2	59	3	3	3	1	1	1	1	1	1	1	160.0	65.0	84.0	25.3906	160	76	32	4.15	46.5	9.13	2.19	2.32	2.73	曹玉琼	510702195405123126	106310110063
0	672	1	3	2	2	59	3	3	3	1	1	1	1	1	1	1	147.0	35.0	50.0	16.197	120	70	27	0.93	\N	113.55	9.21	\N	8.78	张启秀	510702195405213121	106310110122
0	673	1	3	3	1	44	2	2	2	1	3	1	1	3	1	1	166.0	62.0	72.0	22.4996	120	72	33	1.01	275.34	1001	0.07	0.1	0.1	苏韩斌	510702196903193113	106310140145
0	674	1	3	2	2	42	2	2	2	1	3	3	1	1	1	1	150.0	58.0	82.0	25.7778	132	80	17	9.38	\N	444.65	0.24	\N	0.54	葛春蓉	51072119710212084X	106310140144
0	676	1	3	3	2	47	2	3	2	1	1	1	1	1	1	1	157.0	69.0	80.0	27.993	122	72	21	6.4	1001	12.73	4.13	1.71	4.67	刘太玉	510702196602113140	106310110066
0	677	1	3	3	2	46	2	3	2	1	2	1	-1	-1	1	1	160.0	51.0	68.0	19.9219	120	64	12	5.05	1.73	22.25	6.15	10.23	8.11	薛永芬	510702196611283141	106310130109
0	678	1	3	3	2	32	2	2	1	1	1	1	-1	-1	1	1	157.0	49.0	65.0	19.8791	98	64	11	3.18	0	10.29	0.08	0.09	0.13	刘小玲	510703198102132447	106310140122
0	679	1	3	3	1	35	2	2	2	1	1	3	-1	-1	1	1	166.0	60.0	71.0	21.7738	116	64	17	43.63	404.7	166.14	3.75	4.32	4.86	毛星原	51072319771210513X	106310140123
0	680	1	3	3	1	45	2	3	2	1	3	1	1	1	1	1	157.0	65.0	83.0	26.3702	124	76	21	10.68	323.23	58.1	1.76	1.97	2.13	曹华才	510702196805073118	106310090147
0	681	1	3	1	2	27	1	1	1	1	3	1	1	1	1	1	160.0	65.0	80.0	25.3906	114	76	23	3.71	667.9	\N	0.14	0.11	\N	黄小莉	510626198603013904	106310100123
0	684	1	3	3	2	41	2	2	2	1	3	1	1	1	1	1	152.0	51.0	70.0	22.0741	94	62	6	11.29	31.9	7.63	3.82	4.78	5.44	江晓蓉	510721197204200701	106310090152
0	686	1	3	3	1	39	2	2	2	1	2	1	1	1	1	1	175.0	70.0	77.0	22.8571	122	70	43	12.43	7.08	961.08	5.91	4.76	5.71	陈明	510702197404133110	106310140049
0	687	1	3	1	1	40	2	2	2	1	1	3	1	2	1	1	170.0	58.0	72.0	20.0692	118	70	32	6.74	67.75	\N	8.05	8.49	\N	向明	510702197303073112	106310120012
0	688	1	3	3	1	42	2	2	2	1	1	1	2	2	1	1	163.0	70.0	86.0	26.3465	120	72	78	18.44	340.112	160.59	4.57	4.65	4.9	曾庆友	510702197102113130	106310100151
0	689	1	3	3	1	48	2	3	2	1	1	3	2	2	1	1	165.0	75.0	92.0	27.5482	138	80	79	1.55	53.47	128.77	3.68	3.28	3.74	邹坤金	510702196410223118	106310140077
0	690	1	3	3	1	55	3	3	3	1	2	3	1	2	1	1	155.0	45.0	59.0	18.7305	126	74	15	5.41	178.1	6.53	0.25	0.24	0.25	晏天国	510702195807283114	106310120060
0	691	1	3	3	2	49	2	3	2	1	1	3	1	1	1	1	143.0	58.0	82.0	28.3632	136	80	53	17.56	1001	467.58	1.99	0.11	2.16	李志琼	510702196405233127	106310120057
0	692	1	3	1	1	51	3	3	3	1	2	3	1	1	1	1	168.0	77.0	88.0	27.2817	124	94	41	470.05	1001	\N	3.57	3.95	\N	罗长清	510702196111113111	106310120122
0	693	1	3	1	1	49	2	3	2	1	1	3	2	3	1	1	157.0	65.0	84.0	26.3702	134	80	73	0.34	4.17	\N	8.69	8.97	\N	李孝元	510702196311093119	106310130017
0	694	1	3	1	1	52	3	3	3	1	1	3	1	1	1	1	157.0	51.0	7.0	20.6905	116	66	28	2.99	586	\N	9.52	9.27	\N	李孝前	510702196108223117	106310130020
0	696	1	3	1	2	47	2	3	2	1	3	3	1	1	1	1	157.0	60.0	82.0	24.3418	120	74	18	0.03	5.77	\N	0.12	0.15	\N	钟定蓉	510702196608123120	106310130016
0	697	1	3	3	2	56	3	3	3	1	2	1	1	1	1	1	150.0	70.0	87.0	31.1111	114	68	27	27.21	459.75	160.14	1.12	1.62	2.48	兰昆伦	510702195709043125	106310120086
0	698	1	3	3	2	39	2	2	2	1	1	1	1	1	1	1	170.0	52.0	67.0	17.9931	128	80	16	7.3	1001	47.38	9.53	9.59	8.79	邓玉华	519002197401140729	106310090074
0	699	1	3	1	1	38	2	2	2	1	2	3	1	1	1	1	160.0	63.0	82.0	24.6094	126	86	30	120.72	622.1	\N	5.1	4.9	\N	张云	510702197505193139	106310120118
0	700	1	3	3	2	58	3	3	3	1	1	3	1	3	1	1	155.0	45.0	60.0	18.7305	122	76	21	1.8	121.44	22.42	5.94	6.03	6.99	刘成文	510702195502073124	106310150069
0	701	1	3	3	2	46	2	3	2	1	2	3	1	2	1	1	165.0	62.0	79.0	22.7732	124	76	28	13.92	183.69	37.11	5.01	5.08	8.2	兰翔	510702196707163128	106307200006
0	702	1	3	3	2	54	3	3	3	1	1	1	1	1	1	1	145.0	41.0	58.0	19.5006	120	66	16	57.2	62.54	91.03	0.47	0.5	0.66	薛琼芳	510702195812113144	106310130075
0	703	1	3	3	2	50	3	3	3	1	1	1	1	1	1	1	155.0	60.0	98.0	24.974	126	84	57	0.31	52.37	3.26	6.95	7.04	5.97	冯天珍	510702196305243125	106311020028
0	704	1	3	1	2	58	3	3	3	1	3	1	-1	-1	1	1	153.0	52.0	74.0	22.2137	154	90	19	1.73	31.89	\N	9.31	9.35	\N	唐红容	510702195508053124	106310120008
0	705	1	3	3	2	57	3	3	3	1	1	3	1	1	1	1	150.0	65.0	83.0	28.8889	124	78	20	5.14	26.96	13.13	5.85	9.81	3.34	魏秀兰	510702195604263148	106310150009
0	706	1	3	3	1	45	2	3	2	1	1	1	2	1	1	1	170.0	55.0	73.0	19.0311	112	74	20	7.78	47.41	18.99	2.32	1.94	3.16	朱玉平	510702196711223111	106310140070
0	707	1	3	3	2	38	2	2	2	1	1	3	1	1	1	1	163.0	66.0	78.0	24.841	134	94	30	0	55.26	2.53	0.08	0.06	0.14	刘建梅	519002197505150702	106310150050
0	708	1	3	3	2	51	3	3	3	1	1	3	1	1	1	1	157.0	53.0	66.0	21.5019	114	80	21	1.82	81.13	12.75	0.41	0.48	0.39	黄桂英	51070219620525314X	106310140090
0	709	1	3	3	2	33	2	2	1	1	2	3	1	1	1	1	155.0	51.0	64.0	21.2279	130	94	34	0	135.27	30.29	0.08	0.08	0.08	王辉	510703198008242420	106310270175
0	710	1	3	3	2	17	1	1	1	1	2	3	-1	-1	1	1	163.0	65.0	74.0	24.4646	120	74	38	1.39	85.73	18.65	0.15	0.06	0.55	刘春艳	510703199603122428	106310140120
0	712	1	3	3	2	58	3	3	3	1	1	1	1	1	1	1	150.0	51.0	76.0	22.6667	128	74	19	6.56	222.44	31.64	0.35	0.28	0.32	薛玉华	510702195504123148	106310150047
0	713	1	3	3	1	58	3	3	3	1	3	3	2	2	1	1	153.0	50.0	70.0	21.3593	164	84	17	6.17	31.25	8.16	8.28	8.23	6.89	刘定前	510702195502093117	106310160022
0	714	1	3	3	1	44	2	2	2	1	1	3	1	1	1	1	167.0	65.0	79.0	23.3067	122	80	20	0	183.42	26	0.09	0.11	0.14	李孝平	510702196901163113	106310120005
0	717	1	3	3	2	45	2	3	2	1	1	1	1	1	1	1	158.0	52.0	71.0	20.83	166	112	13	4.83	38.01	16.61	8.81	9.65	8.4	吕秀	510702196805273128	106310120059
0	718	1	3	3	2	46	2	3	2	1	1	3	1	1	1	1	145.0	58.0	84.0	27.5862	138	78	26	0	284.67	50.31	0.17	0.13	0.11	韩应芳	510922196709145202	106310150049
0	719	1	3	3	1	50	3	3	3	1	3	1	-1	-1	1	1	165.0	61.0	82.0	22.4059	134	66	19	5.01	56.76	15.12	6.95	7.28	7.02	刘太春	510702196305053110	106310220136
0	723	1	3	1	2	28	1	1	1	1	3	1	1	1	1	1	160.0	48.0	60.0	18.75	102	62	21	0	1001	\N	0.15	0.11	\N	郭莉娟	510781198506110841	106311050077
0	724	1	3	3	2	44	2	2	2	1	2	3	1	1	1	1	135.0	40.0	64.0	21.9479	128	62	24	43.56	941.88	234.44	0.37	0.21	1.01	杨菊喜	510702196908112925	106310120075
0	725	1	3	3	1	45	2	3	2	1	3	3	2	1	1	1	165.0	65.0	85.0	23.8751	106	70	65	8.9	35.19	11.99	8.02	7.66	7.69	李孝能	510702196806293112	106310130149
0	726	1	3	1	1	49	2	3	2	1	3	3	-1	-1	1	1	165.0	78.0	85.0	28.6501	136	90	25	0.9	11.7	\N	1	1.16	\N	辛国全	510702196405183115	106310310090
0	727	1	3	1	2	47	2	3	2	1	3	3	-1	-1	1	1	155.0	61.0	80.0	25.3902	112	70	14	0.08	12.58	\N	0.13	0.13	\N	黄秀琼	510702196601023127	106310310087
0	729	1	3	3	1	43	2	2	2	1	1	3	-1	-1	3	3	168.0	55.0	67.0	19.487	114	78	34	1.14	62.56	117.17	3.2	9.14	2.85	邹少奇	51070219700428311X	106310110032
0	730	1	3	3	2	42	2	2	2	1	1	3	1	2	1	1	164.0	56.0	64.0	20.8209	120	74	16	0.17	32.84	4.9	0.08	0.13	0.12	李生琼	510722197106032720	106310190139
0	731	1	3	3	1	42	2	2	2	1	3	1	1	1	1	1	173.0	77.0	86.0	25.7276	130	78	18	5.98	20.26	46.79	3.4	9.1	8.41	高明武	510721197107300831	106310230023
0	732	1	3	3	1	59	3	3	3	1	1	3	-1	-1	1	1	160.0	60.0	70.0	23.4375	190	85	16	2.29	177.25	11.93	0.15	0.16	0.15	李伦友	510702195405093115	106310130082
0	733	1	3	3	2	57	3	3	3	1	3	3	1	1	1	1	155.0	47.0	72.0	19.563	138	70	7	217.09	237.26	149.98	9.14	9.43	9.24	张琼英	510702195512233128	106310080036
0	735	1	3	3	1	57	3	3	3	1	2	1	1	1	1	1	167.0	77.0	95.0	27.6095	166	110	55	42.04	88.41	49.42	2.23	2.11	2.99	兰伦富	510702195605233119	106310120007
0	736	1	3	1	1	44	2	2	2	1	3	3	2	3	1	1	175.0	80.0	91.0	26.1224	134	86	55	8.2	258.29	\N	0.266	1.95	\N	刘钢	510702196901173119	106310120001
0	737	1	3	3	2	57	3	3	3	1	1	1	1	1	1	1	152.0	48.0	70.0	20.7756	164	90	9	0.29	38.19	358.4	7.55	8.01	7.93	张秀华	510702195607093164	106310080059
0	739	1	3	3	1	46	2	3	2	1	1	1	-1	-1	1	1	175.0	80.0	85.0	26.1224	106	82	55	0.11	64.5	1.15	0.09	0.09	0.12	黄兴民	510702196707153114	106310250114
0	740	1	3	3	1	50	3	3	3	1	1	3	1	1	1	1	167.0	72.0	88.0	25.8166	152	98	19	47.52	326.83	86.63	0.45	0.67	0.47	王元志	510702196307193117	106310080032
0	741	1	3	3	2	42	2	2	2	1	1	1	1	1	1	1	150.0	53.0	58.0	23.5556	150	90	37	0.96	57.94	3.95	0.11	0.12	0.14	杨秀琼	510702197012263143	106310250082
0	742	1	3	3	1	36	2	2	2	1	1	3	-1	-1	1	1	168.0	66.0	84.0	23.3844	112	70	17	0	38.93	4.03	0.11	0.1	0.08	张先斌	510702197703292859	106311040039
0	743	1	3	3	2	42	2	2	2	1	3	1	1	1	1	1	153.0	55.0	76.0	23.4952	162	60	24	0	96.21	25.97	1.68	0.13	0.25	林远蓉	510702197105262828	106310090022
0	744	1	3	3	1	43	2	2	2	1	3	1	2	3	1	1	165.0	50.0	65.0	18.3655	128	74	11	7.89	19.35	10.29	6.71	7.63	7.46	高胜	510702197009203158	106310090021
0	745	1	3	3	1	41	2	2	2	1	3	1	2	1	1	1	160.0	65.0	80.0	25.3906	138	80	26	6.03	26.79	11.17	5.65	5.43	5.47	林中飞	510703197209152419	106311040020
0	747	1	3	1	2	59	3	3	3	1	1	3	1	1	2	2	153.0	65.0	83.0	27.7671	180	100	56	0	203.3	\N	0.1	0.1	\N	李尚英	510702195401263121	106310110017
0	749	1	3	1	2	42	2	2	2	1	1	3	-1	-1	1	1	153.0	50.0	73.0	21.3593	128	90	21	0.57	706.82	\N	0.1	0.12	\N	罗远碧	510721197012220468	106310290222
0	751	1	3	3	2	58	3	3	3	1	1	1	1	2	1	1	160.0	66.0	88.0	25.7812	132	86	12	9.61	12.8	9.54	7.66	7.69	6.07	汪友珍	510702195507103126	106310090053
0	752	1	3	3	2	31	2	2	1	1	2	3	1	1	1	1	160.0	50.0	62.0	19.5312	112	68	11	0.17	325.56	62.79	0.1	0.1	0.09	刘晓川	510703198209202441	106310090111
0	753	1	3	1	2	38	2	2	2	1	2	1	-1	-1	1	1	162.0	49.0	61.0	18.6709	102	64	14	275.48	610.54	\N	7.32	7.82	\N	刘小君	510702197412163125	106310110089
0	754	1	3	3	2	32	2	2	1	2	2	1	-1	-1	1	1	152.0	54.0	76.0	23.3726	114	60	27	5.51	1001	226.19	0.1	0.8	0.07	张艳艳	220102198109015042	106311040057
0	755	1	3	3	2	42	2	2	2	1	3	1	1	1	1	1	156.0	48.0	70.0	19.7239	110	62	8	90.26	74.32	55.66	5.13	8.9	7.33	刘远秀	510702197011043122	106310080090
0	756	1	3	3	2	55	3	3	3	1	3	1	1	1	1	1	158.0	55.0	74.0	22.0317	152	74	12	0	691.95	99.6	0.09	0.1	0.13	尹华玉	510702195712163144	106310090083
0	757	1	3	1	2	42	2	2	2	1	2	1	-1	-1	1	1	150.0	45.0	64.0	20	120	60	8	7.56	372.4	\N	9.92	9.52	\N	魏莉	510702197010163122	106310090039
0	758	1	3	3	1	39	2	2	2	1	3	1	2	3	1	1	180.0	76.0	86.0	23.4568	129	87	30	11.97	100.3	100.26	10.69	10.85	9.8	刘合波	510702197408112819	106310300100
0	759	1	3	1	2	47	2	3	2	1	2	1	1	1	1	1	150.0	58.0	70.0	25.7778	102	72	10	12.83	1001	\N	4.87	4.86	\N	赵太容	510702196610053125	106310080066
0	760	1	3	2	2	47	2	3	2	1	1	1	1	1	1	1	158.0	57.0	69.0	22.8329	126	70	42	0.97	\N	4.95	9.18	\N	9.13	姚仁碧	510721196610110467	106310250081
0	761	1	3	2	2	51	3	3	3	1	1	1	1	1	1	1	150.0	50.0	83.0	22.2222	126	72	25	12.39	\N	25.99	2.42	\N	3.75	杨文珍	51072119620207070X	106310120027
0	762	1	3	3	1	28	1	1	1	1	3	3	-1	-1	1	1	177.0	62.0	73.0	19.79	132	72	32	10.33	816.28	851.11	4.67	8.37	6.21	刘东波	510703198509282412	106310110108
0	763	1	3	1	1	57	3	3	3	1	1	1	-1	-1	1	1	170.0	57.5	82.0	19.8962	134	90	13	20.02	568.23	\N	6.56	6.55	\N	邓林平	51070219560506313X	106310100103
0	764	1	3	1	2	39	2	2	2	1	3	1	-1	-1	1	1	153.0	49.5	76.0	21.1457	142	100	23	3.87	121.6	\N	0.71	0.77	\N	王全会	510702197402232828	106307210039
0	766	1	3	1	2	22	1	1	1	1	2	3	-1	-1	1	1	155.0	51.0	67.0	21.2279	100	60	35	1.13	320.78	\N	0.13	0.1	\N	魏媛媛	510703199106132422	106310280246
0	767	1	3	3	2	48	2	3	2	1	1	3	-1	-1	1	1	160.0	66.0	88.0	25.7812	136	90	18	3.36	69.32	15.78	3.94	3.96	4.93	陈素琼	510702196509193123	106310110004
0	769	1	3	2	1	48	2	3	2	1	1	3	2	3	1	1	160.0	51.0	67.0	19.9219	118	70	15	14.6	\N	94.17	8.98	\N	8.45	刘德军	510702196502013118	106310110009
0	770	1	3	3	2	50	3	3	3	1	3	3	1	1	2	2	155.0	67.0	90.0	27.8876	150	96	13	4.88	168.5	2.08	8.52	8.75	8.85	羊华珍	510702196302133123	106310080067
0	771	1	3	1	1	58	3	3	3	1	3	3	2	3	1	1	150.0	50.0	68.0	22.2222	132	78	14	0.88	594.75	\N	4.83	5.39	\N	魏金成	510702195506283110	106310090110
0	772	1	3	3	2	24	1	1	1	1	3	3	-1	-1	1	1	165.0	72.0	85.0	26.4463	106	68	81	3.07	1001	792.93	0.16	0.19	0.21	罗朝莉	510725198909092720	106311040023
0	774	1	3	3	2	49	2	3	2	1	1	1	1	1	1	1	150.0	50.0	88.0	22.2222	124	84	26	27.85	64.27	127.6	4.07	3.48	4.3	何秀华	510702196309143121	106307200024
0	775	1	3	3	2	59	3	3	3	1	3	1	1	1	1	1	155.0	61.0	90.0	25.3902	126	82	26	1.21	3.08	11.21	9.71	10.03	9.21	钟定英	510702195405203126	106307190032
0	776	1	3	3	1	34	2	2	1	1	2	1	-1	-1	1	1	170.0	63.0	77.5	21.7993	136	80	21	0.05	15.87	1.01	0.09	0.12	0.15	文小军	51222219790625449X	106308150017
0	777	1	3	3	2	27	1	1	1	1	3	1	-1	-1	1	1	155.0	40.0	68.0	16.6493	102	70	15	0.18	117.22	4.01	0.12	0.1	0.12	蒋依锘	510781198604180843	106307200013
0	778	1	3	2	2	50	3	3	3	1	1	1	1	1	1	1	147.0	42.0	57.0	19.4363	116	64	18	6.25	\N	11.64	8.65	\N	8.68	骆春兰	510702196212123124	106310160033
0	779	1	3	2	1	28	1	1	1	1	3	1	-1	-1	1	1	173.0	90.0	90.0	30.0712	128	90	133	0.2	\N	255.98	8.92	\N	8.53	刘波	510703198412022411	106310300153
0	780	1	3	3	2	53	3	3	3	1	1	1	1	1	2	2	152.0	64.5	90.0	27.9172	114	74	17	0.33	241.34	2.65	6.012	6.43	5.63	唐洪秀	510702195910073123	106307210044
0	781	1	3	2	2	58	3	3	3	1	1	3	1	1	1	1	159.0	49.0	76.0	19.3821	134	80	14	0.76	\N	239	9.04	\N	9.27	唐祝英	510702195507163129	106307190021
0	784	1	3	3	1	59	3	3	3	1	1	3	2	1	1	1	157.0	69.0	88.0	27.993	188	98	68	0	5.1	24.86	0.27	0.1	0.11	吴荣清	510702195403233110	106307200011
0	786	1	3	3	1	58	3	3	3	1	1	3	1	1	1	1	160.0	50.0	67.0	19.5312	84	64	35	2.52	15.06	43.48	6.85	6.95	7.24	刘建	510702195508133159	106310180033
0	788	1	3	1	1	45	2	3	2	1	1	1	-1	-1	1	1	163.0	62.0	80.0	23.3355	128	60	21	73.39	452.01	\N	3.45	3.58	\N	钟定宝	510702196804103119	106310120074
0	790	1	3	1	2	29	1	1	1	1	3	3	1	1	1	1	153.0	55.0	74.0	23.4952	122	74	18	0.96	107.18	\N	0.16	0.13	\N	周治娟	511622198404208042	106311030027
0	792	1	3	3	1	43	2	2	2	1	1	3	1	1	1	1	163.0	75.0	95.0	28.2284	138	70	40	10.95	77.97	0.07	9.04	9.49	12.5	林忠武	510702197005143119	106310080015
0	793	1	3	3	2	26	1	1	1	1	3	1	1	1	1	1	155.0	65.0	90.0	27.0552	116	68	35	0.12	170.05	5.79	0.09	0.13	0.11	杨丽	510781198706026345	106311090059
0	794	1	3	2	2	56	3	3	3	1	1	1	-1	-1	1	1	153.0	43.0	70.0	18.369	141	81	46	0.08	\N	25.14	6.18	\N	0.36	张蓉芳	510702195705293127	106307210035
0	795	1	3	3	1	35	2	2	2	1	1	1	-1	-1	1	1	170.0	66.0	82.0	22.8374	118	84	111	13.27	60.29	30.02	5	5.52	5.13	赵成红	510702197712022850	106307200016
0	796	1	3	1	2	57	3	3	3	1	1	3	1	1	1	1	130.0	32.0	73.0	18.9349	120	71	15	74.87	256.77	\N	0.86	1.08	\N	罗明兰	510702195509133126	106307210041
0	797	1	3	3	2	54	3	3	3	1	3	1	1	1	1	1	155.0	50.0	78.0	20.8117	104	70	25	52.1	118.21	43.12	1.5	1.54	2.03	李琼珍	51070219590218312X	106307190026
0	798	1	3	3	2	39	2	2	2	1	3	1	1	1	1	1	167.0	55.0	72.0	19.721	108	74	31	4.76	85.02	80.98	9.29	9.58	8.25	周秀华	510721197406110229	106307220027
0	799	1	3	3	1	55	3	3	3	1	2	1	1	1	1	1	157.0	60.0	80.0	24.3418	138	80	24	0.62	439.95	75.18	0.11	0.14	0.15	冯德明	510702195802083113	106310160005
0	800	1	3	1	2	41	2	2	2	1	3	1	1	1	1	1	155.0	45.0	65.0	18.7305	132	80	38	3.01	119.75	\N	2.53	2.48	\N	杨明菊	510721197206070349	106310120019
0	801	1	3	3	2	38	2	2	2	1	3	1	-1	-1	1	1	167.0	61.0	77.0	21.8724	134	82	29	7.27	1001	1001	9.42	9.52	0.16	李天菊	519002197508165141	106310130022
0	802	1	3	3	2	57	3	3	3	1	3	3	1	1	1	1	155.0	55.0	84.0	22.8928	128	60	30	42.83	6.66	44.42	8.65	1.25	7.53	王苹芳	510702195610103124	106310120120
0	803	1	3	3	2	42	2	2	2	1	1	2	1	1	1	1	163.0	61.0	78.0	22.9591	110	66	22	0.07	1001	93.08	0.16	0.19	0.25	黄晓琼	510702197107173124	106307190035
0	804	1	3	1	2	30	2	2	1	1	2	1	1	1	1	1	160.0	60.0	77.0	23.4375	118	70	74	0.91	115.2	\N	0.24	0.01	\N	江燕	510823198210193483	106310130121
0	806	1	3	2	1	59	3	3	3	1	1	3	2	1	2	2	167.0	65.0	93.0	23.3067	145	89	20	18.79	\N	135.55	4.2	\N	4.37	胥兴根	510702195403043114	106307210027
0	809	1	3	3	2	51	3	3	3	1	1	1	1	2	1	1	165.0	90.0	102.0	33.0579	134	80	40	8.7	18.03	14.04	0.09	2.83	2.99	刘定秀	510702196207093127	106310150075
0	810	1	3	1	1	27	1	1	1	1	2	1	-1	-1	1	1	173.0	80.0	82.0	26.7299	136	84	53	0.86	1001	\N	0.08	0.1	\N	邹仕波	510703198610192438	106310270220
0	811	1	3	1	2	42	2	2	2	1	1	1	-1	-1	1	1	152.0	55.0	70.0	23.8054	130	73	16	4.25	28.77	\N	6.98	4.66	\N	王玉英	510721197012190705	106311040031
0	812	1	3	2	1	43	2	2	2	1	1	1	-1	-1	1	1	167.0	67.0	90.0	24.0238	126	78	14	42.63	\N	71.46	9.29	\N	9	张世明	510702197010033117	106311050015
0	814	1	3	1	1	50	3	3	3	1	1	3	-1	-1	1	1	163.0	58.0	73.0	21.83	132	66	18	37.39	852.3	\N	0.23	0.09	\N	刘学	510702196302023119	106310120037
0	815	1	3	1	1	59	3	3	3	1	3	3	2	2	1	1	162.0	62.0	78.0	23.6244	140	92	9	2.17	79.62	\N	1.12	1.11	\N	蒋忠富	510702195410023111	106310140080
0	816	1	3	1	2	27	1	1	1	1	2	1	1	1	1	1	155.0	65.0	82.0	27.0552	112	74	9	0	3.15	\N	0.14	0.13	\N	林小青	510722198603287067	106310140081
0	817	1	3	2	1	38	2	2	2	1	3	1	-1	-1	1	1	173.0	68.0	85.0	22.7204	126	70	23	3.46	\N	11.2	8.76	\N	8.72	刘青	510702197505202816	106310240049
0	818	1	3	3	2	57	3	3	3	1	1	1	1	1	2	2	158.0	60.5	79.3	24.2349	130	78	13	4.09	46.74	12.5	9.27	9.06	8.61	陈尚兰	510702195602023124	106308140004
0	821	1	3	2	2	59	3	3	3	1	1	1	1	1	1	1	140.0	43.0	71.0	21.9388	102	64	15	30.59	\N	21.55	8.29	\N	8.3	张素英	510702195402183123	106308130024
0	823	1	3	3	2	40	2	2	2	1	1	1	1	1	1	1	167.0	68.0	86.0	24.3824	118	80	21	475.74	505.03	460.53	0.31	0.31	0.26	王世芳	510702197308163125	106310280164
0	824	1	3	3	2	58	3	3	3	1	1	1	1	1	1	1	147.5	46.0	73.0	21.1433	130	72	24	9.21	73.07	13.55	6.42	6.17	6.21	李琼英	510702195501023125	106308150004
0	825	1	3	1	2	59	3	3	3	1	1	1	1	1	1	1	155.0	50.0	70.0	20.8117	130	70	15	11.64	98.18	\N	7.06	7.64	\N	邹坤琼	510702195410143121	106310160156
0	827	1	3	3	1	56	3	3	3	1	1	1	2	3	1	1	163.0	56.0	76.0	21.0772	94	68	26	4.29	7.38	15.74	5.26	5.59	4.55	陈万兴	510702195609093117	106308120035
0	829	1	3	3	1	59	3	3	3	1	1	1	2	3	1	1	150.0	48.0	84.0	21.3333	154	96	9	23.15	31.15	43.75	8.25	8.26	7.35	万合成	510702195403183117	106307210002
0	831	1	3	3	2	36	2	2	2	1	3	1	1	1	1	1	162.5	61.0	84.0	23.1006	116	80	30	0.15	44.66	3.18	0.07	0.1	0.09	杨晓英	510723197609161264	106308140020
0	832	1	3	3	2	44	2	2	2	1	3	1	1	1	1	1	145.0	53.0	84.2	25.2081	120	76	15	5.5	1001	384.61	2.19	2.27	2.75	徐惠屏	510702196903052927	106308140021
0	833	1	3	3	2	50	3	3	3	1	3	1	1	1	1	1	152.5	76.0	110.0	32.6794	128	72	31	0.38	0.64	1.11	10.08	10.17	10.48	罗宗容	510702196209203123	106308140025
0	834	1	3	3	2	58	3	3	3	1	3	3	1	1	2	2	145.0	60.0	89.0	28.5375	158	72	15	7.8	0.42	9.37	9.42	11.65	8.73	姚桂琼	510702195408163123	106308130027
0	835	1	3	3	2	48	2	3	2	1	1	1	1	1	1	1	155.0	50.0	70.0	20.8117	102	76	93	0.69	267.13	19.89	7.4	7.83	7.86	李桂华	510702196508113128	106308130014
0	836	1	3	1	2	49	2	3	2	1	3	1	1	3	1	1	150.0	50.0	68.0	22.2222	124	68	53	1.96	206.98	\N	8.66	8.22	\N	周福容	510702196406063123	106310300038
0	837	1	3	1	2	27	1	1	1	1	1	1	-1	-1	1	1	155.0	65.0	70.0	27.0552	114	80	12	0	1.61	\N	0.12	0.13	\N	蒋玲	510703198609062425	106310170130
[truncated: 691 more rows]

## Sheet: 汇总剔除原则
	筛选阶段	剔除	干预阶段		随访阶段
			干预措施执行情况	干预措施完成的质量
[truncated: 6 more rows]

## Sheet: Sheet1
					Variable					Standard schedule (n=472)	Accelerated schedule（n=440）	χ2 /t	P
[truncated: 46 more rows]

[truncated: 1 more sheets: Sheet2]
